# Supplementary material
Source: HighWire-hosted journal article supplement (doi:10.1101/rna.073288.119)
Supplement: Supplemental_Table_S1_Kinetics_of_RNA_levels.xlsx [file Supplemental_Table_S1_Kinetics_of_RNA_levels.xlsx]

## Sheet: Legend
	Tables S1 & S2. RNA levels measured at each time point of the kinetic response to σE induction. The table S1 provides the normalized RNA levels for each sample of the three experiental series. The table S2 provides the means of RNA levels, the RNA ratio between an experimental time point and the corresponding abundance measured at the origine of the kinetic (t0), the statistical treatments and th…
	Column name	Description	Time
	S1_RNA levels all 3 series
	CDS (synonyms)	DNA portion transcribed encoding for a protein or a non-protein encoding RNA	all
	locus	Locus description	all
	x_t0_series_1	Expression level, first replica	0 min
	x_t0_series_2	Expression level, second replica	0 min
	x_t0_series_3	Expression level, third replica	0 min
	x_t5_series_1	Expression level, first replica	5 min
	x_t5_series_2	Expression level, second replica	5 min
	x_t5_series_3	Expression level, third replica	5 min
	x_t10_series_1	Expression level, first replica	10 min
	x_t10_series_2	Expression level, second replica	10 min
	x_t10_series_3	Expression level, third replica	10 min
	x_t15_series_1	Expression level, first replica	15 min
	x_t15_series_2	Expression level, second replica	15 min
	x_t15_series_3	Expression level, third replica	15 min
	x_t20_series_1	Expression level, first replica	20 min
	x_t20_series_2	Expression level, second replica	20 min
	x_t20_series_3	Expression level, third replica	20 min
	S2_means & Relative ratio t0
	CDS (synonyms)	DNA portion transcribed encoding for a protein or a non-protein encoding RNA	all
	locus	Locus description	all
	x_t0	Expression level (mean)	0 min
	x_t5	Expression level (mean)	5 min
	x_t10	Expression level (mean)	10 min
	x_t15	Expression level (mean)	15 min
	x_t20	Expression level (mean)	20 min
	r_t5	Log-ratio	t5 versus t0
	t_t5	Test-statistic	t5 versus t0
	p_t5	p-value	t5 versus t0
	q_t5	q-value	t5 versus t0
	s_t5	Significance	t5 versus t0
	r_t10	Log-ratio	t10 versus t0
	t_t10	Test-statistic	t10 versus t0
	p_t10	p-value	t10 versus t0
	q_t10	q-value	t10 versus t0
	s_t10	Significance	t10 versus t0
	r_t15	Log-ratio	t15 versus t0
	t_t15	Test-statistic	t15 versus t0
	p_t15	p-value	t15 versus t0
	q_t15	q-value	t15 versus t0
	s_t15	Significance	t15 versus t0
	r_t20	Log-ratio	t20 versus t0
	t_t20	Test-statistic	t20 versus t0
	p_t20	p-value	t20 versus t0
	q_t20	q-value	t20 versus t0
	s_t20	Significance	t20 versus t0

## Sheet: RNA levels individual series
	CDS (synomyms)	locus		x_t0_series_1	x_t0_series_2	x_t0_series_3		x_t5_series_1	x_t5_series_2	x_t5_series_3		x_t10_series_1	x_t10_series_2	x_t10_series_3		x_t15_series_1	x_t15_series_2	x_t15_series_3		x_t20_series_1	x_t20_series_2	x_t20_series_3
	thrL	U00096.3:189-255		16155.2	29474.6	14055.3		16847	15148.8	10078.2		12987.9	11381	5527.39		21888.9	4260.08	7071.65		7816.14	7898.37	3392.42
	thrA	U00096.3:336-2799		19.6047	29.9733	20.4563		23.0832	18.6581	15.7551		8.23374	6.48449	7.59269		11.2855	6.83065	6.55654		7.60001	7.61339	5.62408
	thrB	U00096.3:2800-3733		24.1969	22.7881	28.2111		29.4894	28.8942	21.7489		24.4384	7.63165	7.23748		7.75355	13.054	9.69195		8.96343	8.28499	10.9903
	thrC	U00096.3:3733-5020		28.2072	31.9367	34.5191		44.4368	40.5931	28.3396		13.9258	11.4268	10.7196		9.28141	6.57608	7.36633		9.5036	9.37473	8.2044
	yaaX	U00096.3:5233-5530		13.392	14.9637	11.0035		42.7524	38.093	35.2539		29.9814	18.4414	5.53549		13.9	7.49021	7.9868		16.0774	11.5464	2.01343
	yaaA	U00096.3:5682-6459		17.5772	22.0318	31.7878		20.0347	15.4487	16.6287		14.0222	7.92072	17.1273		6.34997	8.33986	9.91764		6.23509	5.3387	7.18368
	yaaJ	U00096.3:6528-7959		0.790518	2.74738	2.88203		0.902562	1.85202	0.946557		2.18291	0.787407	1.97867		1.9607	0.384066	0.815611		2.09199	0.984964	1.52838
	talB	U00096.3:8237-9191		222.784	269.561	240.395		266.173	222.967	201.574		250.485	121.726	130.071		108.762	84.5759	91.3007		123.391	104.516	105.017
	mog	U00096.3:9305-9893		27.4945	19.8952	11.8341		20.5481	31.2311	24.6485		23.8488	12.519	14.7374		12.3841	17.3391	11.8394		17.8009	8.47258	15.1712
	satP	U00096.3:9927-10494		5.51741	1.77706	0		5.66414	4.49033	3.28494		6.07195	7.42045	7.48313		10.809	15.3739	8.09		13.6401	6.56206	5.76148
	yaaW	U00096.3:10642-11356		0.716092	0.771227	0.785316		0.842606	1.10193	0.394525		1.55423	4.7437	2.94224		2.97477	5.3312	3.7518		7.15963	2.10226	5.70384
	yaaI	U00096.3:11381-11786		0.667082	0.478958	0		0	1.0528	0		1.12877	0	0		4.17365	1.3531	0.861959		4.22277	0.87889	0
	dnaK	U00096.3:12162-14079		284.225	426.156	535.105		643.978	429.391	322.645		523.643	253.96	269.819		1353.84	1547.68	1158.09		1490.89	1330	1295.09
	dnaJ	U00096.3:14167-15298		45.6736	56.2839	83.9857		92.0054	54.8411	63.277		108.85	49.0833	66.4645		227.965	328.229	200.572		237.076	137.618	197.401
	hokC	U00096.3:16750-17006		0	3.86369	0		0	0	0		0	0	0		0	0	0		0	0	13.1053
	mokC	U00096.3:16750-17006		0	0	0		0	0	0		0	0	0		0	0	0		0	0	0.000194351
	sokC	U00096.3:16750-17006		12010.3	21798.3	2156.46		2669	8367.49	12847.3		0	15630.3	3709.67		14653.6	695.186	1763.36		6451.18	15368.6	1820.86
	nhaA	U00096.3:17488-18655		19.2531	13.0887	14.8596		21.8454	17.2066	26.8279		32.443	15.9813	19.2615		21.8229	19.9362	22.8726		17.9066	12.1723	13.5988
	nhaR	U00096.3:18714-19620		11.7957	5.3202	6.27426		12.9754	13.9658	15.1001		12.2431	10.0524	11.6374		13.8117	13.4766	15.4914		11.6516	9.65556	11.2816
	rpsT	U00096.3:20814-21078		4708.54	1560.13	1739.2		4232.03	5817.5	9359.73		3982.15	4829.22	4976.19		5625.54	3898.89	3633.02		4555.16	2630.66	2866.36
	yaaY	U00096.3:21180-21399		2.51402	6.79127	0		0	5.90081	4.34587		0	35.1553	22.2067		19.769	26.5342	2.7118		16.5024	22.4433	3.96409
	ribF	U00096.3:21406-22348		18.4448	20.8751	28.3436		13.7008	19.0808	21.1398		10.4589	8.31851	8.24056		10.5809	17.2497	12.7862		13.9138	10.7683	10.8489
	ileS	U00096.3:22390-25701		32.6119	44.5133	35.9736		54.1854	49.4966	42.6131		32.7146	21.5785	18.2255		31.1328	29.5164	22.607		26.796	30.0779	25.8974
	lspA	U00096.3:22390-25701		32.5892	18.219	32.1181		54.6544	54.5133	28.3667		14.9845	15.0146	28.3423		28.8657	25.0533	33.7759		21.3793	23.217	22.5251
	fkpB	U00096.3:25825-26275		44.8262	68.9331	58.0398		82.503	79.0456	43.2908		39.5787	30.356	34.3693		49.7005	51.6757	25.6803		61.3637	52.7918	37.4523
	ispH	U00096.3:26276-27227		13.52	6.8591	11.0318		16.7978	17.5553	24.0791		16.5576	13.2477	11.4005		20.5961	19.7478	10.6939		11.9969	24.18	20.3396
	rihC	U00096.3:27292-28207		25.7279	33.7055	26.7413		13.6638	9.08659	11.2523		12.3551	4.2034	5.33738		4.90683	5.70178	5.08488		7.83082	5.43152	10.4479
	dapB	U00096.3:28373-29195		20.0885	26.4007	33.204		29.1692	19.0853	46.0192		17.1609	11.248	19.4095		7.11402	12.0916	13.1831		9.12526	6.99561	9.09604
	carA	U00096.3:29650-30799		1.65918	4.03762	2.42012		1.49042	1.54587	3.05886		6.08421	3.24587	1.8069		3.90484	2.46605	4.55073		3.63865	2.03684	4.93638
	carB	U00096.3:30816-34038		2.00381	1.76986	1.26961		1.40631	1.593	1.96955		1.58803	1.80173	1.75547		1.42425	2.2752	1.16945		2.46523	1.71612	1.83349
	caiF	U00096.3:34299-34695		0.804847	8.3013	5.83654		1.64744	2.31979	2.19052		1.51339	4.68726	4.98822		6.21916	8.66349	24.4554		16.1586	5.90551	4.6934
	caiE	U00096.3:34780-35371		3.33298	2.9522	1.89967		10.8336	9.81325	21.7585		290.256	206.07	221.817		410.237	293.627	214.18		343.31	185.338	201.697
	caiD	U00096.3:35376-36162		1.02412	0.537124	0.945385		3.84516	5.31954	6.17912		71.0584	34.4036	77.5975		95.0243	107.731	81.2866		98.8325	76.4407	59.6258
	caiC	U00096.3:36270-37824		0.561928	0.742685	0.55377		0.836191	0.523669	0.524384		3.66331	4.60851	3.36137		5.63895	3.11869	3.00131		3.88275	7.05572	3.66132
	caiB	U00096.3:37897-39115		1.09823	1.0429	1.44478		2.03146	1.13817	2.77438		9.21369	6.99954	6.22796		10.4893	9.81511	8.74916		10.1191	7.41177	6.62859
	caiA	U00096.3:39243-40386		2.61195	2.57384	2.21612		2.31742	0.949387	2.95502		3.03596	3.28116	3.97967		4.05324	3.2975	6.24276		5.04056	3.92071	3.92711
	caiT	U00096.3:40416-41931		0.382492	0.338694	0		0	0.0636943	0.130216		0	0.300351	0		0.581129	0.280637	1.12557		0.595263	0.509818	0.103809
	fixA	U00096.3:42402-43173		1.02118	0.251475	0		0.742253	0	0.789842		0.456554	0	0.623034		0.709699	0	0.267781		1.76801	0.341977	0.732656
	fixB	U00096.3:43187-44129		0.379461	0.495289	1.88711		1.07483	0	1.25407		2.63272	3.04123	5.33988		2.63969	3.92311	5.25093		3.3608	1.72336	8.215
	fixC	U00096.3:44179-45466		0.0794096	0.258754	0		0.333343	0.929442	0		3.29638	1.53309	3.21633		3.1868	1.71715	0.447228		2.77104	1.43375	1.35131
	fixX	U00096.3:45463-45750		0	0.723407	0		2.19653	0	0		16.9196	2.49258	4.33288		2.41003	2.76766	5.65423		0	4.07767	1.82767
	yaaU	U00096.3:45806-47138		0.388383	0.296963	0.263225		0.375973	0.178328	0.194486		2.73047	1.44707	1.53821		2.90786	1.60015	0.259566		1.92596	1.10118	1.2955
	kefC	U00096.3:47245-49631		1.82553	1.81219	0.878595		0.911976	2.08126	1.23954		1.49849	0.429486	1.07275		1.43488	1.80786	0.793563		0.935718	1.37721	1.04119
	kefF	U00096.3:47245-49631		0.88225	0.742046	1.42372		0.673251	1.26146	0.697264		2.5096	0.758118	1.09565		0.816829	0.333287	0.833456		0.519733	1.77381	1.06211
	folA	U00096.3:49822-50302		25.3221	18.8998	25.6067		19.4003	17.7928	60.5712		43.708	7.96409	15.1009		13.4569	20.0286	18.821		11.7696	8.27434	18.8319
	apaH	U00096.3:50379-51222		8.10565	6.01162	8.66113		14.4374	16.5355	11.197		41.5756	51.7123	54.2699		55.0138	42.9007	53.5532		60.3139	73.8916	62.3322
	apaG	U00096.3:51228-51606		64.1865	58.1295	121.598		55.7815	57.1251	99.604		188.876	119.438	421.83		416.821	277.982	377.527		468.838	246.881	190.45
	pdxA	U00096.3:51608-54702		11.1968	15.6489	9.24116		29.9448	27.395	41.6196		213.912	115.492	169.179		220.758	227.363	139.745		189.231	174.974	235.574
	rsmA	U00096.3:51608-54702		33.4339	31.3514	30.4179		52.2227	65.228	60.6766		200.186	215.174	206.568		308.36	169.092	155.071		242.961	277.584	152.883
	surA	U00096.3:51608-54702		60.6084	74.7004	70.756		131.007	199.431	346.52		1291.31	1130.72	1482.53		1341.42	1666.93	1377.27		1461.35	1254.78	1394.83
	lptD	U00096.3:54754-57109		26.6119	39.4058	36.3563		52.5994	66.6208	107.32		202.671	194.151	283.068		287.89	226.825	263.714		278.154	286.651	196.626
	djlA	U00096.3:57363-58179		11.6234	9.97871	10.0631		18.7623	37.743	41.3926		158.571	208.865	223.263		193.051	143.622	182.845		172.945	154.443	135.524
	yabP	U00096.3:58473-59279		11.688	10.052	7.97683		17.6684	16.7487	26.7649		77.2806	139.495	119.134		137.176	99.6885	130.575		137.117	133.63	76.3921
	rluA	U00096.3:59686-60346		18.648	3.48718	4.71295		17.6334	15.6244	29.7367		18.6487	18.9043	18.8012		23.4225	27.5922	19.9483		19.5313	15.72	11.2279
	rapA	U00096.3:60357-63264		9.87575	3.63999	4.55362		11.7534	18.7044	19.7497		20.9968	15.7831	20.9027		22.1154	24.3572	14.3311		19.4561	12.9185	10.6884
	polB	U00096.3:63428-65780		1.61832	3.24603	1.99772		2.39814	1.37876	1.45931		1.70859	1.48389	0.584481		1.50006	1.71203	0.826891		1.32518	1.92808	2.23072
	araD	U00096.3:65854-66550		1.11197	0.314839	0		0	0.840151	0		4.1034	1.99973	2.0129		1.70692	1.44114	1.00992		0	1.18055	0.263165
	araA	U00096.3:66834-68337		0.382481	0.741608	0.698553		0.581942	0.230882	0.160615		0.945698	0.618067	0		0.525701	1.11558	1.45161		1.06037	0.556646	1.27918
	araB	U00096.3:68347-70048		0.453531	0.170672	0.202426		0	0.175168	0		0.337263	0.673473	0.199573		0.577168	0.604017	0.50196		0.730526	0.728232	0.90167
	araC	U00096.3:70386-71265		15.4104	14.2405	8.58063		2.23068	3.13799	3.89759		4.89637	5.79583	6.30698		7.5975	3.08331	2.93329		18.105	13.9083	11.4474
	yabI	U00096.3:71350-72115		5.14699	4.69403	4.13509		35.9814	54.991	102.899		268.803	166.565	348.634		191.322	280.993	220.344		372.017	162.061	216.518
	thiB	U00096.3:72228-75480		4.7227	4.21969	6.76955		6.36371	3.44275	6.69654		2.31853	0.942412	0.796311		0.700104	2.07648	3.70571		3.61754	0.56875	1.83373
	thiP	U00096.3:72228-75480		2.31921	1.68836	1.40208		1.46073	2.63813	3.01663		2.32464	2.16426	3.85489		1.45456	1.83515	1.16794		1.07671	0.774246	0.907826
	thiQ	U00096.3:72228-75480		5.40512	2.75921	1.94728		2.1497	3.56613	4.60296		4.04115	1.24725	3.02813		1.44271	0	0.966681		0.706892	0.501812	2.04386
	sgrR	U00096.3:75643-77299		2.75609	3.36024	1.95778		1.8048	2.66621	1.39327		2.92532	1.35744	0.633977		1.91293	1.37528	0.465028		2.4547	1.29582	1.39801
	sgrS	U00096.3:77366-77593		89.5495	92.1439	332.648		75.7648	130.2	208.506		46.2231	101.384	223.374		36.5416	40.8465	206.472		93.7631	40.5342	24.1214
	sgrT	U00096.3:77366-77593		81.5757	95.2105	0		0	0	0		122.796	84.2651	0		45.7229	0	0		0	0	0
	setA	U00096.3:77620-78799		9.86809	6.50319	8.39453		8.25475	5.47329	4.89213		3.65267	2.40388	8.53868		3.406	4.8979	5.25879		4.91257	3.31134	4.88161
	leuD	U00096.3:78847-79453		1.83393	1.63492	3.81151		1.7366	2.70463	2.66058		16.1607	5.74045	6.9544		5.79179	7.45738	5.1702		10.9142	7.87847	11.6938
	leuC	U00096.3:79463-80864		0.773057	1.43304	1.15869		1.83889	2.34871	2.5578		11.846	9.70152	6.01194		12.1162	7.7961	10.5222		9.92145	8.8558	10.0905
	leuA	U00096.3:80866-83529		0.482129	1.31841	2.09142		0.779012	0.987854	2.38295		4.74292	3.34903	3.42822		4.08055	3.64632	1.95265		4.79688	2.58675	4.92994
	leuB	U00096.3:80866-83529		0.494208	1.03791	2.29328		1.35127	1.0513	0.769055		5.46327	4.27169	6.83384		9.53201	9.80716	6.46899		8.75583	4.1297	9.43177
	leuL	U00096.3:83621-83708		223.202	1156.54	2334.92		750.299	334.239	958.233		469.236	640.171	993.049		1864.56	398.722	206.901		486.846	219.905	192.58
	leuO	U00096.3:84367-85312		0.458566	1.91164	2.17241		0.787277	0.213191	0.665977		0.323501	0	1.08306		0.889368	1.44516	2.33254		2.06446	0.555291	0.728569
	ilvI	U00096.3:85629-87354		2.73049	4.26813	3.2251		3.19931	2.05181	2.1344		5.46352	1.72753	4.13773		3.62887	1.92437	2.89028		4.74176	2.36303	2.20484
	ilvH	U00096.3:87356-87848		1.33363	3.87271	2.04471		0.662228	0	0.995103		4.77177	1.62444	1.21707		0.727741	7.62006	3.25254		3.75998	3.51053	5.12554
	cra	U00096.3:88027-89032		18.0591	14.4113	11.1035		9.30918	6.59017	8.17778		28.0908	15.5424	12.5884		22.1913	20.2257	14.128		22.6805	11.8853	16.9592
	mraZ	U00096.3:89633-90092		51.0532	55.9909	44.2604		32.6556	33.4413	35.3227		51.6065	34.2811	23.4102		63.5828	31.2921	21.1837		36.1471	16.6003	27.6812
	ftsL	U00096.3:90093-91397		314.509	530.128	104.238		350.663	698.654	184.405		52.7475	550.092	98.0785		341.509	81.6546	55.4646		71.6689	192.616	38.6412
	rsmH	U00096.3:90093-91397		36.7108	53.4011	40.8563		38.2685	43.9782	36.4922		23.5541	25.0645	23.5905		31.0196	31.5221	23.8895		29.5875	24.328	23.8892
	ftsI	U00096.3:91412-97084		40.4135	25.8721	20.7885		38.654	30.0047	29.0033		16.7706	16.755	28.4702		14.989	20.6124	10.8349		22.1214	20.3992	11.4942
	mraY	U00096.3:91412-97084		19.9271	15.2193	23.453		35.6641	31.6573	39.7098		26.0694	26.4511	19.1957		29.389	20.8826	13.1284		24.966	13.0423	23.1916
	murE	U00096.3:91412-97084		21.4399	19.8744	23.4879		28.2684	22.3096	30.7325		11.1518	13.6894	15.0861		21.0147	21.833	16.2435		19.3616	19.7651	23.3703
	murF	U00096.3:91412-97084		10.4781	12.9815	15.1885		16.3506	14.6325	15.3333		14.5277	8.63542	7.75655		8.05822	8.64157	4.94017		15.2001	9.64848	11.3996
	ftsW	U00096.3:97086-100711		13.3325	7.27542	13.2393		25.1363	19.4367	25.4589		11.1767	14.5437	20.1185		20.1174	23.9511	13.8731		18.1844	14.0805	15.8882
	murD	U00096.3:97086-100711		29.3014	11.3313	26.9796		48.4427	53.3196	43.2549		50.3698	21.3336	26.4964		29.6009	23.3683	16.8134		20.6263	21.8213	19.8254
	murG	U00096.3:97086-100711		17.6423	12.8543	19.8858		29.5176	29.9559	44.1552		38.1399	17.4502	30.3027		20.7255	21.0848	22.2539		20.2187	17.5984	19.5831
	ddlB	U00096.3:100764-103153		37.3691	41.9347	37.6934		52.4953	58.0434	50.6775		41.4852	57.4106	55.0075		36.5467	33.3617	37.5936		35.4828	31.6025	28.0298
	murC	U00096.3:100764-103153		21.6572	19.7751	18.2751		28.2793	31.9385	37.0425		27.6239	22.0045	28.5228		17.1126	24.2519	24.7627		26.0336	21.6787	23.6778
	ftsA	U00096.3:103154-105244		68.8733	55.5583	49.0862		92.5602	85.9694	115.499		261.535	201.192	292.893		237.427	199.018	261.916		252.299	258.093	179.673
	ftsQ	U00096.3:103154-105244		32.124	30.115	21.552		45.4647	57.0244	67.6889		67.144	47.4031	63.4913		51.4398	46.7902	52.8901		42.681	35.4957	36.1266
	ftsZ	U00096.3:105304-106456		70.5953	53.2546	56.4864		118.415	98.2002	155.33		849.8	414.397	437.753		475.453	490.772	357.898		439.78	440.914	431.99
	lpxC	U00096.3:106556-107474		77.2912	66.2861	64.0536		82.8518	109.37	91.5698		167.777	84.5564	177.004		158.926	197.967	207.317		185.472	149.451	145.473
	secM	U00096.3:107704-108217		37.9084	52.1485	64.4784		33.5634	37.5443	55.5631		121.794	115.107	145.517		222.634	111.87	96.0052		186.94	115.82	117.181
	secA	U00096.3:108278-110984		40.8915	49.8759	41.0643		44.9	52.2946	45.9718		94.7268	99.3493	121.553		234.165	163.001	199.002		193.227	231.525	126.86
	mutT	U00096.3:111043-111433		8.52275	5.69734	14.5373		14.9034	7.58295	11.6718		6.4181	20.5478	6.88161		8.43336	23.296	15.0087		26.3357	10.4156	6.16535
	yacG	U00096.3:111648-111846		328.262	313.752	253.01		429.069	396.718	268.169		190.649	366.748	309.267		145.122	215.746	156.408		111.228	266.793	168.799
	coaE	U00096.3:111855-113219		18.6394	16.4349	13.9046		16.4864	18.7404	17.3449		14.504	14.4552	19.0949		11.5874	17.9407	8.77469		12.8919	12.979	7.92719
	zapD	U00096.3:111855-113219		14.8292	20.6583	15.7852		22.8457	20.2259	24.171		30.5605	9.37488	22.3723		15.9835	11.9443	9.52941		19.3653	11.7686	10.7501
	guaC	U00096.3:113443-114487		33.699	27.4694	21.0267		24.7926	35.6004	41.1926		13.6401	17.312	17.0733		16.1415	15.7823	15.5897		11.1423	7.31667	5.99154
	hofB	U00096.3:114521-117099		0.434526	0.280771	0.145545		0.343359	1.66265	0.852194		1.18473	1.61108	1.45038		3.13489	2.81059	1.00596		2.99164	1.80001	2.05196
	hofC	U00096.3:114521-117099		1.54481	0.966627	0.685718		1.0872	1.43659	1.76477		0	0.233931	1.60958		2.30816	1.95165	1.75615		1.26845	0.621085	1.42672
	ppdD	U00096.3:117108-117549		0	0.233612	0		0	0	0		1.20505	0	1.06066		2.76236	0	0		0	0.270137	0
	nadC	U00096.3:117751-118645		2.21773	7.42301	7.43872		2.85553	4.44367	4.69174		3.92959	1.68479	2.55474		2.08677	1.81874	5.1713		3.22116	2.19404	2.5209
	ampD	U00096.3:118732-120135		5.91122	9.38253	10.5968		6.48846	2.52616	4.83498		1.93481	1.58814	8.0285		3.57859	6.90738	1.89395		5.09709	4.41614	5.55107
	ampE	U00096.3:118732-120135		6.6756	10.9845	9.30735		5.73953	8.20047	3.64915		5.08096	11.0314	4.58304		4.61637	2.85212	5.52453		6.2228	4.80246	3.63478
	aroP	U00096.3:120177-121551		4.3339	4.22576	6.44065		5.18181	5.08719	4.13505		10.6827	11.2808	9.73242		15.3633	5.60557	8.63273		13.3514	11.0365	7.88308
	pdhR	U00096.3:122091-122856		6.84962	25.7498	49.6592		46.5936	51.7555	79.4139		87.3705	42.5807	43.1135		51.3362	26.2999	11.3071		10.5939	6.73275	9.04212
	aceE	U00096.3:123016-125680		319.012	111.791	89.4745		165.459	244.739	261.747		185.865	179.019	212.973		149.153	163.63	98.5601		67.8867	38.9905	30.0976
	aceF	U00096.3:125694-127587		346.76	117.924	74.815		136.485	189.383	233.263		187.144	149.486	219.207		134.102	181.055	135.907		89.4688	41.8084	40.3203
	lpd	U00096.3:127911-129336		539.347	381.867	259.849		334.618	293.141	392.737		617.014	417.757	415.992		364.123	323.351	226.041		324.986	292.238	226.244
	yacH	U00096.3:129406-131260		0	0.13171	0.105711		0.246144	0.265802	0.153829		0.455083	1.12132	0.621586		0.792878	0.791994	0.845773		0.726979	0.54799	0.976229
	acnB	U00096.3:131614-134212		49.5814	86.8295	67.4838		90.6034	67.8674	48.5876		55.7779	54.5268	47.9156		67.7915	65.9766	54.3541		72.4519	98.2362	112.952
	yacL	U00096.3:134387-134750		24.2371	40.7976	29.6504		41.5409	29.7521	57.4807		31.7725	22.0897	8.95274		22.4848	37.7888	32.452		37.0069	27.4311	33.3003
	speD	U00096.3:134787-135582		97.6124	102.949	47.6603		86.1084	112.182	149.481		208.887	148.417	201.324		203.45	112.031	142.277		141.289	107.81	69.3597
	speE	U00096.3:135597-136464		59.1905	41.313	31.8983		67.8408	78.6228	109.507		164.346	123.428	129.916		156.828	106.697	99.1617		99.6247	98.1658	59.9983
	yacC	U00096.3:136569-136917		47.5076	34.2171	22.7952		18.9697	30.775	37.2232		18.9449	22.3163	14.8029		30.5848	20.1266	27.3637		27.3625	30.6399	20.5594
	cueO	U00096.3:137082-138633		3.72395	6.39593	5.74614		5.0614	5.87517	7.0546		9.86553	5.25878	10.8313		8.44826	9.06318	5.741		10.2085	6.27613	9.70269
	gcd	U00096.3:138834-141225		3.9508	3.80981	3.9772		10.1194	11.1636	14.5086		12.2319	9.35053	12.8553		16.6463	8.4763	4.98364		3.51567	2.29798	2.04916
	hpt	U00096.3:141430-141967		59.1	45.9032	34.2627		56.893	60.3301	52.2477		39.6573	31.2181	39.9699		27.3648	31.6955	32.7454		24.3635	23.4812	19.9097
	can	U00096.3:142007-142670		56.5933	85.1555	45.027		37.8746	39.9506	36.5951		29.0369	34.5479	30.905		76.7259	41.088	33.2842		46.6412	50.8676	40.9985
	yadG	U00096.3:142778-144472		10.2246	19.3064	14.8284		16.4794	18.7843	22.1585		23.8457	21.2903	25.0647		38.7412	22.6577	20.6519		19.8359	19.0801	11.6229
	yadH	U00096.3:142778-144472		7.78606	11.7793	14.1822		16.7204	10.9424	17.5603		24.7972	20.0963	13.2345		21.8631	16.1059	14.8537		15.3021	12.2957	12.467
	yadI	U00096.3:144576-145017		18.2108	5.36489	15.1965		10.5569	11.2567	17.8323		18.4945	25.0983	40.3833		28.0303	35.6177	22.1676		37.4174	40.7193	22.2126
	yadE	U00096.3:145080-146310		2.03631	2.21958	2.2116		1.83355	1.08107	2.8201		5.43248	3.3071	3.13051		4.8767	3.7895	3.33891		5.81798	3.32531	1.81976
	panD	U00096.3:146313-146694		83.0813	107.796	159.063		109.547	68.6973	155.961		74.6719	28.4238	83.9342		31.1786	70.8106	59.2105		76.3537	36.167	92.0929
	yadD	U00096.3:146967-147870		9.12722	16.0484	13.1406		6.17093	7.53454	8.38558		15.6593	19.232	11.8986		17.3092	5.80577	7.48035		10.4276	9.4144	7.80104
	panC	U00096.3:147943-148795		72.2751	124.102	79.7935		55.467	74.4232	65.5202		54.9291	40.1135	37.1787		38.5574	29.5971	23.8698		54.7899	35.4933	30.574
	panB	U00096.3:148806-149601		22.2124	39.0034	45.6042		20.8471	29.5021	30.2718		26.6768	13.1216	14.8324		20.3245	17.9264	12.8026		23.2084	10.0091	18.3699
	yadC	U00096.3:149714-150953		1.5004	0.887083	0.231238		0.352846	1.62906	1.20716		2.62938	2.6735	2.37635		2.11639	2.64707	2.88415		2.93181	4.24786	3.29273
	yadK	U00096.3:151002-151599		0.959111	0.408862	0		0	2.16335	1.30345		10.7385	6.82582	13.466		14.1453	7.11515	7.28637		12.7854	16.1357	3.37129
	yadL	U00096.3:151625-152231		0	0.819566	0		1.08879	1.74966	0.565855		0	2.68205	0.876912		8.26296	5.30946	10.6908		11.406	6.89265	3.59459
	yadM	U00096.3:152242-152812		0.345074	1.26466	0		0	1.08178	0		1.59896	4.76862	8.85979		6.23656	6.86265	5.92031		8.20438	5.05223	5.39295
	htrE	U00096.3:152828-155426		0.0831695	0.35587	0.3371		0.0813877	0.643717	0.493741		2.11419	0.467556	0.928964		1.68796	0.910847	1.20853		2.0689	1.4066	0.50703
	yadV	U00096.3:155460-156201		0	0.38197	0		0.995653	0	1.1596		0.584166	1.32609	0		1.68506	2.02018	0.256421		0.567779	0.575821	0.307525
	yadN	U00096.3:156298-156883		0	0	0.711793		0.366112	0.326024	0		0.264223	0.0591724	0.708915		0.101576	1.07486	1.11302		1.04108	0.202465	0
	folK	U00096.3:157252-159126		12.2465	6.64035	11.3421		10.7764	10.6636	22.0772		20.6196	9.63936	6.60128		14.5121	10.7619	9.37073		9.31016	5.96648	8.22208
	pcnB	U00096.3:157252-159126		40.8418	28.173	30.3721		43.8942	49.0706	44.9575		34.5674	28.7984	25.2774		30.9608	28.6141	29.1412		33.2873	25.1925	21.7413
	gluQ	U00096.3:159185-160112		14.0652	5.51802	3.95734		5.84018	8.09666	7.40489		7.76511	5.64955	4.90862		11.9589	7.85694	6.48606		8.34545	9.08578	7.79111
	dksA	U00096.3:160148-160604		613.17	746.989	383.316		315.9	325.097	488.828		522.001	545.989	419.097		439.474	250.333	295.723		484.38	453.977	510.33
	sfsA	U00096.3:160781-161486		41.1602	47.5813	44.4908		28.7847	34.1535	20.3198		12.0729	15.82	11.5079		12.5765	10.7815	14.4494		18.8607	21.5762	9.81652
	ligT	U00096.3:161500-162031		2.32706	8.91931	12.2524		0.595226	1.93441	2.2352		3.85192	1.65941	0		3.30764	3.30586	0.985627		3.1091	2.54818	1.20895
	hrpB	U00096.3:162104-164534		4.38999	3.93147	3.87562		3.92373	3.61922	5.11341		4.18695	2.09188	3.31423		4.92479	4.28545	3.05738		3.0247	3.62321	3.0211
	mrcB	U00096.3:164729-167264		7.18991	5.11376	5.1026		6.00616	6.60928	9.82693		3.30454	2.38471	5.1783		4.19062	5.84793	4.03012		5.02501	4.24865	4.83616
	fhuA	U00096.3:167483-169727		14.6263	15.3174	11.7685		5.73527	6.18826	6.23498		4.29233	2.09004	2.00231		1.95358	2.10629	0.723527		1.76731	0.98055	0.616003
	fhuB	U00096.3:169777-173444		3.98957	1.01584	1.13037		2.35345	2.59514	0.900009		1.39842	0.712474	1.03079		1.84284	1.4685	0.500076		0.834098	0.728238	0.62106
	fhuC	U00096.3:169777-173444		7.92112	6.52101	4.36349		5.43727	2.96827	1.91241		3.62325	4.02471	0.898166		2.74759	1.30332	0.670016		0.986982	1.69305	0.472433
	fhuD	U00096.3:169777-173444		5.93792	1.5051	2.10213		0.738035	2.69805	0.759453		1.16439	2.30494	0.381083		0.272936	1.00198	0.355928		0.880212	0.921761	1.5393
	hemL	U00096.3:173601-174882		26.8019	22.6429	36.5299		27.882	31.396	39.0898		36.3632	21.7901	27.2734		24.12	23.5082	17.3935		26.2401	16.3032	21.5136
	clcA	U00096.3:175106-176528		4.74877	5.91501	9.08954		5.63055	6.00071	8.09709		5.23646	3.26183	6.05532		4.51204	4.62869	3.19711		3.74317	4.11497	2.99619
	erpA	U00096.3:176609-176954		151.246	82.9035	64.1375		181.928	137.84	173.764		52.7024	73.0291	103.142		82.9994	122.245	72.6152		90.8305	49.4243	60.638
	yadS	U00096.3:177000-177624		6.7902	4.89116	4.67528		9.84999	6.15653	13.1657		1.40255	4.47754	4.96848		5.42457	10.1257	4.94402		5.97289	4.62807	5.92332
	btuF	U00096.3:177661-179153		13.8206	7.6766	6.18718		7.08161	7.01496	10.308		8.32506	5.02298	5.33901		6.01758	8.71696	3.95687		8.99393	4.69908	3.75037
	mtn	U00096.3:177661-179153		21.931	18.3572	23.1195		21.0975	18.2941	35.5275		31.5504	16.0815	20.5693		12.4364	28.9145	15.4312		10.7664	7.95942	13.2941
	dgt	U00096.3:179236-180754		2.61738	7.2534	6.3616		2.63442	1.46185	2.33291		2.6146	0.867086	3.46965		1.79958	2.33153	2.0958		6.05105	1.97862	1.96118
	degP	U00096.3:180883-182308		22.5625	37.2309	45.8487		393.547	541.344	889.582		5671.92	4305.67	5686.68		9271.6	8920.82	6987.31		7662.24	5179.48	6931.73
	cdaR	U00096.3:182462-183620		8.20324	5.66885	2.59492		7.32403	10.8455	14.1747		73.5174	93.8538	75.3732		141.825	117.359	95.2507		103.628	99.6872	60.4888
	yaeH	U00096.3:183708-184095		11.9251	45.6372	32.6876		7.51977	14.7063	15.1194		13.1141	15.5916	17.5849		12.1745	17.8474	17.8894		20.1313	3.91168	20.9723
	yaeI	U00096.3:184256-185069		0.317863	2.46349	1.75539		1.25054	0.828725	0		0.271759	1.75645	0.632968		0.565052	0.709406	0.543904		0.175336	0.943388	0.57947
	dapD	U00096.3:185122-185947		44.6932	74.0902	90.0679		72.0784	55.9859	83.3566		59.9119	25.1957	37.4281		21.189	30.6527	24.4231		18.6845	14.8331	20.863
	glnD	U00096.3:185977-188650		3.08628	4.0353	3.25339		3.41762	3.13448	3.63279		3.47838	2.27358	1.84408		1.79609	1.61265	3.35528		2.42497	2.03848	1.1366
	map	U00096.3:188711-189506		55.8992	35.496	28.857		33.2017	42.5362	48.9487		21.1062	17.9017	23.0885		22.8878	21.8879	12.6594		23.2932	8.14418	11.7766
	tff	U00096.3:189711-189847		4306.65	1474.04	2528.41		3561.34	2364.63	7458.85		5334.32	3913.36	8580.16		4132.24	7205.49	7733.8		4786.88	3257.23	4091.68
	rpsB	U00096.3:189873-190599		902.628	617.05	556.681		720.418	1042.09	1563.5		1398.53	1296.8	1269.93		905.349	1027.14	883.423		912.827	918.928	605.554
	tsf	U00096.3:190856-191708		420.788	186.17	192.865		353.914	305.018	499.083		525.928	395.812	571.004		407.273	420.753	293.368		343.891	272.871	222.481
	pyrH	U00096.3:191854-192580		56.7101	61.7967	49.8609		50.7037	146.682	133.638		125.74	149.79	164.076		187.483	94.828	75.3143		118.357	74.8317	62.785
	frr	U00096.3:192871-193429		518.217	334.909	171.148		445.133	392.651	364.538		336.22	326.54	280.966		323.094	319.267	242.364		247.663	203.434	163.721
	dxr	U00096.3:193520-194717		12.8704	7.96385	9.62729		12.6649	17.5773	16.7125		16.1142	20.8613	15.3614		20.6963	15.7422	13.997		13.6429	9.60141	10.7295
	ispU	U00096.3:194902-195664		33.4288	25.4818	23.2295		26.7788	38.8049	38.5578		33.1151	40.1291	47.1284		39.3768	59.2589	55.0942		48.0549	36.0608	35.864
	cdsA	U00096.3:195676-196534		42.4379	33.2042	49.9976		52.3312	69.7762	54.2761		84.7616	72.0504	84.0446		101.343	59.3699	65.8355		62.9138	50.9184	37.0823
	rseP	U00096.3:196545-197898		63.5233	55.1308	44.8289		348.915	315.699	594.749		1209.03	1196.59	1854.44		1265.17	1631.94	2205.8		1416.04	926.392	785.418
	bamA	U00096.3:197927-200360		59.0737	83.2209	68.7126		170.891	378.223	419.236		1544.83	2073.6	2678.93		2122.65	2457.92	2600.04		1850.82	1698.12	1188.96
	skp (hlpA, ompH)	U00096.3:200481-200967		112.413	123.938	116.279		173.756	241.8	400.838		2663.14	1905.62	3346.54		2632.46	5657.93	5914.79		2988.11	1846.37	3253.59
	lpxD	U00096.3:200970-201996		109.166	59.3828	70.2776		151.525	199.783	258.295		1607.25	1317.94	2052.72		1708.06	3687.95	2251.74		2323.16	1562.8	1536.35
	fabZ	U00096.3:202100-202556		170.638	188.598	75.1138		264.216	396.298	320.221		1258.95	2048.12	1250.03		3795.09	1349.31	987.415		1431.7	2047.73	603.921
	lpxA	U00096.3:202559-205089		222.604	69.2586	142.7		174.814	226.527	227.444		908.465	632.178	1823.46		1488.22	2730.13	1582.7		1802.46	879.538	959.16
	lpxB	U00096.3:202559-205089		23.1715	23.8464	18.1914		27.648	63.5829	57.3676		337.357	332.167	327.954		368.655	256.776	266.392		238.292	182.417	98.0248
	rnhB	U00096.3:202559-205089		17.1395	5.29401	12.3662		18.1827	18.0929	26.106		160.318	84.6951	146.395		109.403	190.34	94.5663		150.045	43.6407	79.7479
	dnaE	U00096.3:205125-208608		16.4132	10.4318	9.907		22.2499	25.4218	29.7048		129.131	111.381	116.684		157.782	132.426	110.777		120.307	100.84	77.7953
	accA	U00096.3:208620-209580		86.4206	81.3434	97.5412		91.6982	102.539	141.487		353.63	201.665	297.068		400.534	361.457	266.442		399.543	262.483	241.484
	ldcC	U00096.3:209678-211820		1.05095	1.89391	2.65741		3.18572	3.40248	4.84757		6.76601	3.78836	5.52778		10.6066	8.45985	7.83811		8.15668	6.42889	6.1882
	yaeR	U00096.3:211876-212266		5.26326	16.2316	20.6595		7.02133	7.03699	14.4337		22.7028	9.02795	2.65583		3.57733	7.75945	13.9046		13.9932	7.40628	12.2631
	tilS	U00096.3:212330-213629		4.49944	3.52942	5.78		5.77728	3.51387	4.3814		5.87376	5.02738	4.16835		3.47902	2.73815	3.09537		6.05519	4.92517	3.24283
	rof	U00096.3:213677-214125		54.7179	120.365	149.92		67.6094	47.9597	86.718		40.2488	30.9416	53.9365		26.5157	31.8213	25.9023		26.5234	41.6001	22.5793
	yaeP	U00096.3:213677-214125		102.255	72.3054	66.6679		39.0098	35.35	40.5706		9.53724	0	27.0641		20.8728	3.58904	33.3255		16.6359	6.4278	21.1084
	arfB	U00096.3:214290-215255		3.5808	13.4056	8.43205		4.5914	5.30854	7.21653		7.7135	6.67095	5.06385		5.90395	10.4742	8.42097		13.2393	6.26381	18.1912
	yaeQ	U00096.3:214290-215255		7.37924	9.78886	8.71949		6.07129	6.16406	7.85162		5.74917	2.97884	5.59898		7.69842	9.37112	3.32904		7.13393	4.18303	6.98664
	nlpE	U00096.3:215268-215979		7.74534	11.234	8.392		3.72659	10.5252	8.08394		10.1589	10.6644	5.76668		5.20985	12.2342	6.7153		11.596	11.6753	8.0815
	yaeF	U00096.3:216178-217003		0.617149	2.31082	2.90482		1.49437	1.33852	0.768512		0.362636	2.69566	2.41697		2.40066	3.43964	3.12625		2.53969	1.94493	1.88836
	proS	U00096.3:217056-218775		71.2552	45.8583	38.853		73.0503	71.6256	75.1934		77.2077	42.1286	54.6167		47.5036	54.0005	35.7848		47.4922	36.2632	36.0911
	rcsF	U00096.3:218886-219995		35.4225	45.2725	29.5184		39.142	36.9079	42.1214		66.8213	38.3969	27.0241		69.501	37.2491	17.755		32.7124	21.9999	35.3918
	tsaA	U00096.3:218886-219995		11.9277	19.9961	16.3141		21.2975	18.9533	22.8223		9.51062	9.15191	13.38		27.2467	14.257	16.938		20.2132	14.2957	7.8206
	metQ	U00096.3:220112-220928		28.5612	32.3849	20.7025		22.1936	20.4024	33.0529		29.6756	17.7938	23.6332		22.4111	26.4544	13.6603		29.3377	22.0211	22.2181
	metI	U00096.3:220967-222645		19.6278	12.9593	9.74085		19.5893	14.4454	18.3105		22.4702	14.876	16.7687		21.4917	10.2773	12.0249		16.4851	12.7273	7.13686
	metN	U00096.3:220967-222645		12.6109	7.50206	7.83257		12.8625	12.214	11.5049		9.47308	5.56134	9.84676		14.9507	13.5067	11.3898		12.5429	13.7565	6.60632
	gmhB	U00096.3:222832-223408		21.5474	35.9186	38.4627		22.7316	19.1287	20.4859		19.1219	9.86316	14.1064		14.2791	5.03452	13.9279		17.1898	9.16095	7.58077
	rrsH	U00096.3:223770-225312		0	0	0		0	0	0		0	0	0		0	0	0		0	0	0
	ileV	U00096.3:225380-225457		543135	548877	1224380		1059710	2868110	1146320		847015	1331310	982230		2816550	2309950	1463150		1530590	850078	1026130
	alaV	U00096.3:225499-225575		599360	218107	694820		1869250	1102980	613265		7782070	4230110	2476550		1718850	1052580	481566		994182	119482	1888910
	rrlH	U00096.3:225758-228662		0	0	0		0	0	0		0	0	0		0	0	0		0	0	0
	rrfH	U00096.3:228755-228875		0	0	0		0	0	0		0	0	0		0	0	0		0	0	0
	aspU	U00096.3:228927-229004		361220	677288	87788.3		710059	955131	118517		621382	2514880	216081		342068	227846	273204		219712	2074760	241561
	dkgB	U00096.3:229166-230881		1.56725	3.17835	4.58226		4.56415	2.87231	4.68795		3.64045	2.21296	1.53641		2.1	1.99551	4.19215		3.27676	1.91287	0.88653
	yafC	U00096.3:229166-230881		5.88314	19.6423	4.58973		4.41496	7.52356	6.3873		2.09286	3.16135	4.66341		6.81183	3.97315	3.98008		4.8837	6.37462	3.02629
	yafD	U00096.3:231121-231922		8.74857	21.6521	23.2142		5.36654	5.16718	8.34804		10.2735	7.58121	8.7862		33.2125	24.4034	15.572		22.3457	15.2757	16.6612
	yafE	U00096.3:231925-232549		6.65817	9.77438	7.49694		13.5298	6.52148	8.9002		6.38155	5.81292	12.5526		30.0696	15.7425	14.957		16.5463	19.0512	8.26084
	mltD	U00096.3:232596-233955		61.424	34.3471	46.0851		67.1103	80.2703	102.165		47.0335	35.2977	46.7126		26.3784	29.2582	25.3604		25.7959	20.5857	15.0807
	gloB	U00096.3:234026-234782		3.98825	12.1632	29.2865		12.5084	12.2216	13.8964		6.07723	7.56558	8.45693		6.99703	8.13889	4.72971		14.9398	8.6385	8.84072
	rnhA	U00096.3:234815-236002		12.2202	9.86764	10.6836		14.8344	9.8128	6.64038		11.0852	4.27847	4.43414		3.43356	9.64899	2.75322		9.68399	8.78986	7.91106
	yafS	U00096.3:234815-236002		5.7429	8.91834	17.041		2.59553	5.35931	3.9737		1.59315	3.76576	2.87907		5.99417	5.65569	5.82725		3.65583	2.49742	4.06372
	dnaQ	U00096.3:236066-236798		9.63745	12.2319	10.1109		9.80947	14.9721	12.028		10.2523	10.0179	4.94373		12.3852	6.36223	7.97147		8.03158	8.01135	5.58753
	aspV	U00096.3:236930-237007		161955	305310	56775		217928	243882	39061.7		152088	533220	105144		52661.9	118641	161635		76362.4	403455	130595
	yafT	U00096.3:237334-238120		0.549549	0.518376	0.570818		0.661952	1.0782	2.44757		0.860558	0.576701	2.31572		0.541092	1.75372	1.47769		0	0.630056	0.586795
	ykfM	U00096.3:238256-238736		0	0	0		0	0	0		0.700376	0	0		0	0	1.01695		0	0	0
	yafU	U00096.3:238745-239102		0.63858	0.416654	0		1.29429	0.611276	0		0	0	7.07042		0	0	4.06016		3.58316	4.16476	0
	yafF	U00096.3:239105-239378		0	4.48986	2.88612		2.08974	0.741519	7.56731		0	14.731	0		12.6633	9.14698	4.16829		8.27163	6.52447	9.73963
	yafV	U00096.3:239418-240189		4.04471	7.57616	10.7176		3.13375	4.74903	4.00497		2.79998	1.71831	1.53782		1.18621	2.34177	2.36953		3.94585	3.34448	2.28562
	ivy	U00096.3:240342-240816		28.1912	39.687	44.5344		26.6835	26.1827	33.5408		19.4231	24.3241	21.5594		14.2921	17.746	9.31756		19.6328	11.6217	17.53
	fadE	U00096.3:240858-243303		2.8089	5.88177	3.80593		0.683518	0.932512	0.939182		0.571696	0.904958	0.430457		1.40582	0.74999	0.948905		2.23788	3.28695	5.4918
	gmhA	U00096.3:243542-244121		64.7113	63.9246	72.3873		52.1191	36.9326	60.5797		29.5212	23.0028	22.8291		19.411	31.9652	23.6886		25.0939	19.3639	25.731
	yafJ	U00096.3:244326-245805		29.6823	33.7579	31.8655		22.7493	31.865	30.7181		23.2966	19.8599	17.01		25.9437	23.4549	14.9451		23.9474	18.7445	17.7525
	yafK	U00096.3:244326-245805		10.4906	21.8771	14.6594		14.8698	19.2747	19.9029		12.9296	19.2484	26.4128		18.8246	14.9923	18.3078		18.3239	14.3017	11.5627
	yafQ	U00096.3:245960-246239		31.5648	77.0845	50.6042		29.7807	56.0361	84.6595		46.3178	39.647	59.3877		46.7566	19.2165	39.9845		44.1078	30.5681	24.0436
	dinJ	U00096.3:246241-246502		13.7065	17.2675	10.7093		7.00643	5.95833	26.497		29.5974	8.4834	3.17036		6.16355	11.7637	3.79703		7.43588	6.69097	9.58588
	yafL	U00096.3:246711-247461		0.180058	0.372695	0		0.356987	0	0.455885		2.36979	0.448201	0		0.397093	0	0.566066		0	0	0.390874
	rayT	U00096.3:247636-248134		6.31565	11.939	10.8165		5.5346	1.77142	0.915259		5.2694	3.87081	3.64095		2.07871	1.33947	5.79171		4.18532	6.94506	1.14389
	lfhA	U00096.3:248357-250070		0.0822976	0.280854	0.119841		0	0.303827	0.173197		0.203135	0.201841	0		0.325801	0.705374	0.102069		0	0.194699	0.60111
	lafU	U00096.3:250071-250827		0.227395	0.714541	0		0.799854	0.802962	0.925528		0.478447	1.0223	1.23484		0.700096	1.17077	0		1.78843	1.82374	0.355556
	dinB	U00096.3:250897-251953		1.30957	2.08086	1.74064		0.463506	2.13267	2.69465		1.28069	2.23743	2.75225		1.53701	1.61501	1.33298		2.64579	2.49073	2.42681
	yafN	U00096.3:252004-252298		1.02577	6.54359	2.17528		16.6126	1.6008	1.90497		0	9.46629	5.21083		5.19275	3.18162	0		9.77803	2.17632	5.45622
	yafO	U00096.3:252300-252699		1.04387	1.25746	0		1.8979	0.871986	4.15555		0	0.476394	0		2.76169	1.14018	2.72868		1.06047	0.732632	1.23542
	yafP	U00096.3:252708-253161		0	0.818145	0.65482		1.27295	1.18572	1.84659		4.23286	0.557018	2.57366		1.09152	0.811523	0.455297		2.74885	0.49799	3.03942
	ykfJ	U00096.3:253478-253685		0	2.57438	0		0	0	0		0	0	0		0	0	0		0	6.32343	3.54647
	prfH	U00096.3:253701-254202		0	0	0		0	0	0		0	0	0		0	1.13274	0		0	0.285517	0.300966
	pepD	U00096.3:254258-255716		53.8776	67.1212	53.1753		89.7434	77.8681	48.2382		47.6873	34.4422	33.9199		31.4096	32.9485	21.1055		30.253	27.5018	26.5916
	gpt	U00096.3:255976-256435		55.2562	14.8598	31.7511		57.8183	76.6214	94.6146		83.5209	35.7416	38.2386		27.6284	54.2266	60.4241		44.4144	19.2157	30.6804
	frsA	U00096.3:256526-257771		6.8216	12.9852	8.87117		6.14691	8.14926	9.79059		3.65022	5.3533	10.124		3.89283	4.6179	2.68498		4.40243	5.27839	3.98803
	crl	U00096.3:257828-259006		36.6308	52.4504	30.0695		32.5957	29.9583	37.3294		29.2439	42.5431	25.9755		34.2671	33.4167	34.9531		36.1166	31.1252	44.1048
	phoE	U00096.3:259044-260100		0.918897	0.627703	1.58814		0.756458	0.160496	0.242118		0	0.643118	0.672068		0	0.571123	0.570952		0.169272	0.711016	0.25894
	proB	U00096.3:260387-261491		16.3575	21.3907	15.3694		16.6087	9.77491	18.5581		12.9959	5.71075	8.44591		9.6595	10.599	7.44097		13.8138	8.06968	11.1325
	proA	U00096.3:261502-262756		17.7107	18.7062	22.5187		17.5163	14.5337	17.2009		8.44651	5.14453	8.33454		7.4185	12.7594	4.52684		11.3189	6.43643	12.7013
	thrW	U00096.3:262870-262946		128578	101039	740157		183571	185309	784485		3844570	2264410	1594660		1477630	1441190	2256850		1076270	199191	1705570
	ykfN	U00096.3:263149-263212		0	0	0		0	0	0		0	0	0		0	0	0		0	0	156.641
	ykfI	U00096.3:263327-263669		0	0	0.591076		0	0	0		0	1.25148	0		1.64019	0.61709	0		0	0	0.47206
	yafW	U00096.3:263689-264007		0	1.25792	5.41963		0	0	0		0	0	0		5.04548	2.01058	0		1.43842	0	0.790359
	ykfH	U00096.3:264025-264247		0	0	0		3.33955	0	0		13.9187	5.30365	0		10.5152	10.5242	0		0	6.77202	4.15458
	ykfG	U00096.3:264255-264732		0	0	0		0	0	0		2.96986	0	1.06119		0	3.10073	2.69483		0.608247	1.19215	0.427863
	yafX	U00096.3:264747-265206		0	0	1.46719		1.03293	0	0		0	0	0		7.48936	2.18976	1.39247		3.18554	1.97129	1.93566
	ykfF	U00096.3:265303-265543		2.46045	1.93189	0		0	0	0		0	0	0		5.73429	3.06057	0		4.15509	0	5.48633
	ykfB	U00096.3:265619-266087		7.91491	8.87798	9.44863		8.94332	10.3025	3.49441		16.5568	13.8405	10.1233		8.91719	14.57	7.40329		11.8783	14.4033	25.959
	yafY	U00096.3:266109-266774		3.09573	13.5456	2.30574		7.1949	7.57727	8.33839		7.28447	17.9227	15.9537		11.2207	17.4143	6.53581		7.83486	12.1341	5.74317
	ykfL	U00096.3:266109-266774		0	10.9783	14.5004		6.92024	6.1885	0		0	8.99855	0		0	3.43858	17.7589		21.3932	32.4865	19.0722
	ykfK	U00096.3:266775-266967		0	3.40236	9.56444		0	0	0		0	0	17.8432		0	0	0		0	2.78687	7.16343
	yafZ	U00096.3:267183-268005		0	0.27436	0		0	0	0		1.2488	1.69159	0.576954		1.66383	0.453114	0.825793		0.293011	1.52538	1.37828
	ykfA	U00096.3:268096-268960		0.956232	1.68635	1.60897		1.80786	2.19737	2.70893		1.77297	1.06012	2.01816		1.26949	3.54622	3.14157		2.33077	1.97962	0.917503
	perR	U00096.3:269288-270182		0.15571	0.820684	1.93069		0.286068	0.923925	0.73333		3.45237	1.12513	1.02792		1.57078	1.0767	2.14316		1.35479	2.51439	1.09127
	insN	U00096.3:270277-272189		2.3158	5.01386	4.43408		2.54461	4.61831	6.84707		10.6068	9.58149	20.0225		16.2299	17	13.7694		23.5391	13.2738	14.3043
	eyeA	U00096.3:272579-272654		0	0	0		0	0	0		201.368	0	0		0	0	0		0	0	224.418
	ykfC	U00096.3:272846-273954		0.944117	2.11836	0.999934		1.57945	0.942304	4.40994		4.99531	3.48819	10.0684		8.13654	9.22851	7.25293		9.65842	4.60481	9.07515
	mmuM	U00096.3:275324-277647		1.70127	1.89573	3.18446		0.52988	1.58597	1.87019		0	1.56968	3.25607		0.513264	2.35114	1.29559		2.05345	1.88646	1.8652
	mmuP	U00096.3:275324-277647		0.534095	0.885039	0.46775		1.157	0.0975981	0.422024		1.7604	0.504561	0.317012		0.854207	0.867012	1.16723		1.01112	0.913943	1.31413
	afuC	U00096.3:277755-278802		0	0.748518	0		0	0.150911	0		2.99639	0.731939	2.7526		0.279219	1.17051	1.02993		0.943325	1.24522	1.48329
	afuB	U00096.3:278813-279161		0	0	0.912958		0	2.30188	1.63134		6.39543	7.53738	0		6.35404	0	0.991612		3.5663	2.45245	0.737692
	insX	U00096.3:280113-280362		73.2645	102.502	61.9057		45.7083	41.2483	36.7193		41.295	27.0217	61.1046		31.1653	34.6543	27.5521		15.3433	36.5334	26.0662
	yagB	U00096.3:280426-280735		14.7085	9.53089	27.8574		8.47596	8.22511	8.1636		11.8076	24.0751	15.9741		20.8815	9.77378	11.3467		11.6995	11.5816	8.83098
	yagA	U00096.3:280828-281983		0	0.330263	0.147122		0	0.0846169	0.2521		0.315529	0	0		0.240262	0.114872	0		0.453497	0.49639	0.114518
	yagE	U00096.3:282277-283186		3.4901	6.93666	3.09683		0.878539	1.13549	0.878913		0.374689	0	0		2.2133	1.46717	0.171552		2.78578	1.97858	2.9852
	yagF	U00096.3:283200-285168		2.23831	5.31894	5.27316		1.43064	0.763816	1.46621		1.79347	0.338394	0.558446		0.683781	1.25017	0.145757		0.408713	0.686348	2.39795
	yagG	U00096.3:285394-286777		0.233123	0.207666	0.335675		0.166919	0.149045	0.35573		1.40503	0	0.222238		0.422414	0.268562	0.203672		0.257783	0.438144	0.724899
	yagH	U00096.3:286788-288399		0.426913	0.298435	1.27875		0.362169	0.330367	0.727959		1.24273	0.679134	0		0.596246	0.405413	0.222879		0.208399	0.210926	0.372352
	yagI	U00096.3:288403-289162		8.57514	6.9092	5.9654		5.41519	4.04107	4.67568		4.34913	4.11285	1.58486		3.83625	5.59108	2.21847		6.06405	2.73305	7.39319
	argF	U00096.3:289300-290305		1.5137	2.5196	4.74885		1.80251	1.65748	1.13172		4.33158	2.06497	1.95382		1.1164	2.4536	2.52057		2.06221	1.00506	2.90536
	ykgS	U00096.3:290428-290633		28.6567	40.2874	53.7575		24.305	13.0879	56.6872		5.82432	21.0142	38.2338		95.9892	9.04134	49.0935		42.992	21.0434	17.0455
	yagJ	U00096.3:291403-292231		1.67663	3.75782	1.07942		1.65657	1.67841	0.755555		2.75384	4.74694	1.62801		2.20245	3.32745	1.05337		6.07004	1.52655	2.15053
	yagK	U00096.3:292321-292948		1.87636	4.51269	1.90184		2.82336	1.49346	1.76833		0.406261	2.50522	1.33784		3.09826	2.89476	2.14022		1.27025	3.44488	2.34645
	yagL	U00096.3:293219-293918		2.30448	1.2082	1.20068		0.401331	1.11036	1.57623		1.26053	0.966199	2.25382		0.456801	2.3789	3.43911		6.46892	2.60081	1.00459
	yagM	U00096.3:293944-294799		0	0.213636	0.713999		0.565392	0.692487	0		1.89341	0.56709	1.00776		1.49649	1.03176	2.8294		1.08076	0.583884	0.344523
	yagN	U00096.3:295138-295579		25.4334	78.0937	18.9124		20.8207	19.3765	31.996		12.3338	9.89331	19.9647		23.6509	9.39144	15.9249		38.8719	13.2439	16.193
	intF	U00096.3:295695-297096		9.67734	22.6441	11.0592		4.80194	5.94833	5.05957		4.48426	8.87792	6.02534		7.03771	4.9034	6.57955		8.36164	6.95381	5.62276
	ptwF	U00096.3:297205-297254		2549700	1515410	16655500		6345910	3533190	22960400		28523500	21887100	28040800		2516960	19372700	31509100		20607800	4096190	15340300
	paoD	U00096.3:297380-298726		0.471286	0.8383	0		0.57157	0.744375	1.03586		0	0.368698	0.914413		1.21243	0	0.192783		1.12167	0.409044	1.12633
	yagP	U00096.3:297380-298726		4.14109	0.54507	0		1.04069	0	0		0	0.521361	0		0	1.97894	0		0	0.286589	0
	ykgT	U00096.3:297380-298726		0	47.0379	0		0	0	0		0	0	0		0	0	0		0	0	0
	paoA	U00096.3:298735-302573		0	0.255937	0		0	0.652872	0.352051		0.425044	0	0		0.741784	0.667506	0.817462		0.304716	0.450515	1.31692
	paoB	U00096.3:298735-302573		0	0.0930754	0.389293		0	0.120615	0		0.363474	0	0		0.619822	0.331411	0.679395		0.445823	0.34433	0.308064
	paoC	U00096.3:298735-302573		0.355729	0.191302	0.609339		1.2335	0.146323	0		0.403188	0.136392	0.158379		0.223858	0.323882	0.349117		0.434616	0.40796	0.524688
	yagU	U00096.3:302990-303605		34.8687	43.013	35.81		18.012	13.4681	13.7949		5.87376	11.492	7.73151		9.57147	5.13837	7.69251		5.93945	6.6659	4.51368
	ykgJ	U00096.3:303852-304182		2.8957	9.22984	2.32332		1.65749	3.38596	2.94322		3.52177	2.0457	7.39789		0	6.08772	1.16126		2.57871	4.27111	3.22889
	ecpC	U00096.3:304494-309332		0.164849	1.05123	0.434867		1.0049	1.79196	0.476174		0.889482	1.36573	1.18287		2.31843	2.16238	2.06712		1.12847	1.42107	1.19391
	ecpD	U00096.3:304494-309332		0.349573	0.450433	0.137472		1.12455	0.548829	0.179731		2.80676	1.16857	1.05776		1.88798	1.90753	0.735492		2.36318	0.937835	1.36296
	ecpE	U00096.3:304494-309332		0.767592	1.08102	0.285641		0.688981	1.03766	0		1.05479	0.326561	4.80871		1.76554	1.72654	1.23943		1.24734	0.928648	1.70546
	ecpB	U00096.3:309357-310026		0	0.357154	1.31751		0.518069	0	0.630247		1.28793	0	0.870437		0.576952	0.325086	0		2.88075	1.83633	1.17207
	ecpA	U00096.3:310083-310671		1.42233	0.863447	0.438699		1.15428	2.30384	4.20373		1.36445	1.95976	4.487		1.75657	1.55825	0.350309		1.38722	1.32174	2.49069
	ecpR	U00096.3:310745-311336		0	0.196243	1.55193		0	0.251481	0		0.530942	0.565352	0		0.515973	0.243208	0		0.863171	0.215605	0
	ykgL	U00096.3:312111-312339		7.81998	21.8693	0		6.51161	18.7566	26.6412		15.4876	29.8158	50.4647		15.9477	13.843	0		26.3859	17.3323	16.5057
	ykgM	U00096.3:312373-312777		26.6028	23.5192	5.64677		6.48665	11.6891	8.44359		0	8.36469	7.68277		1.5239	4.69938	11.7325		6.26993	2.63864	4.59622
	ykgO	U00096.3:312373-312777		69.2059	41.4905	0		71.5498	34.0574	0		0	0	0		25.3455	15.9354	0		19.9208	22.2859	26.0353
	ykgR	U00096.3:313140-313242		64.1278	93.2239	73.7651		0	0	26.4584		0	57.6936	0		0	0	0		37.116	31.8359	82.2956
	ykgP	U00096.3:313715-313805		0	0	0		0	0	185.224		0	0	0		135.318	0	0		104.832	173.356	0
	eaeH	U00096.3:314356-315228		0	0	0		0	0	0		0	0.370745	0.478948		0	0	0		0.491973	0.125613	0.139733
	ykgA	U00096.3:316485-317169		1.31273	2.22475	0.776663		0.829557	1.23979	0.905885		0	2.00492	5.226		1.97633	2.55339	3.19588		1.94117	2.84696	1.29496
	ykgQ	U00096.3:317438-317567		0	0	0		0	0	0		0	0	0		0	0	0		0	0	36.5693
	rclC	U00096.3:317725-318319		0.645104	1.05416	0		0	0.533278	2.10281		0.566628	0	6.53967		1.43136	1.03442	3.56224		0.522877	1.76668	2.6514
	rclB	U00096.3:318330-318567		3.19805	2.01107	0		0	0	0		0	15.131	40.236		4.61569	0	5.62237		10.1115	22.3165	6.61166
	rclA	U00096.3:318675-320001		0.0647305	1.02286	0.467002		0.69502	1.18339	1.20687		2.54393	3.19325	2.26122		2.66759	4.0263	3.38727		3.34794	2.49391	2.31309
	rclR	U00096.3:320226-321081		1.95315	1.89001	1.76951		0	0.775877	0.598893		0	0	0.835895		0.926698	0.669103	1.85305		1.6041	1.1181	1.07604
	ykgE	U00096.3:321607-322327		8.79955	6.55814	7.23937		3.3121	0.362162	1.48781		0.82012	0.873035	0.511097		0	2.25364	1.31655		4.71053	7.94816	6.07904
	ykgF	U00096.3:322337-324453		4.79148	10.203	3.83612		2.75312	2.50776	2.79527		4.46303	2.85916	5.93541		7.51835	5.49565	6.10927		8.17299	6.49831	9.11316
	ykgG	U00096.3:322337-324453		5.8616	7.37002	7.31007		2.96069	3.63105	1.73151		7.19971	4.72932	3.64809		9.52975	7.71261	6.28746		6.5083	4.40766	10.1401
	ykgH	U00096.3:324695-325364		0.515343	4.62072	0		1.29152	0.599998	0.564867		0.429314	0	0		0.753441	0.244207	0		1.28817	0.174005	1.02726
	betA	U00096.3:325576-327247		3.42296	9.00136	7.66035		5.58504	3.55923	3.63908		3.86544	3.81383	1.643		5.50478	4.37096	2.7329		4.80977	5.82632	6.00627
	betB	U00096.3:327260-328733		9.58204	16.1997	11.2558		12.242	5.9523	5.08046		9.71656	4.08993	5.986		4.56829	6.46791	6.91698		7.12088	8.156	10.549
	betI	U00096.3:328746-329334		23.4184	28.9372	24.8559		14.7605	7.73627	8.50635		18.8141	4.73783	5.46128		10.9709	10.6255	13.1523		14.2752	16.2949	18.9119
	betT	U00096.3:329462-331496		7.27016	8.00239	4.72948		5.47105	3.88558	3.97922		6.41355	4.50091	4.61055		2.82762	4.1102	3.43099		5.40909	4.42698	4.54013
	yahA	U00096.3:332370-333459		5.65979	4.74345	4.40148		7.73143	9.42198	9.15232		9.33119	6.61702	11.561		15.182	13.2637	13.4241		12.474	9.01465	5.45999
	yahB	U00096.3:333500-334433		3.53721	3.01339	1.81904		0	1.96221	3.17403		0.875788	1.63463	2.92252		3.08078	2.6528	1.22536		3.69642	2.96556	2.78668
	yahC	U00096.3:334524-335022		0	0.211129	0		0.775048	0.958957	1.58296		2.39253	1.9122	3.68957		9.30729	1.51442	1.98624		3.62285	3.06309	2.23501
	yahD	U00096.3:335279-335885		0	0.838419	0.510734		0	0.692826	0.257795		1.32528	0.707947	0		0	0	0.831981		0.711649	0.643877	0.317207
	yahE	U00096.3:335924-339743		0.164754	0.191803	0.606737		0	0	0		1.14084	0	0		0	0	0.189694		0.271387	0	0.250961
	yahF	U00096.3:335924-339743		0.273372	0.0476273	0		0	0.0584203	0.329308		1.72734	0.542462	1.16131		0.707713	0.671703	0.71317		1.28843	0.999711	1.17613
	yahG	U00096.3:335924-339743		0	0.121845	0.447306		0	0.0869519	0.443911		0.247009	0	0.304325		1.31986	0.912287	0.133435		1.26147	0.147822	0.870917
	yahI	U00096.3:340164-341115		0.152279	0.292983	0.212306		0.529339	0.333857	0		2.06981	0.626327	0		2.41271	2.41113	0.54794		2.46245	1.68581	2.7681
	yahJ	U00096.3:341124-342507		0.520916	2.5218	2.09893		1.19765	1.72882	1.8086		4.46837	1.85668	2.79916		3.04007	5.16867	2.98019		4.60747	3.85576	5.39368
	yahK	U00096.3:342883-343933		1.09452	3.61063	4.81385		3.63145	5.44691	6.6775		4.14647	2.62686	11.8537		4.86255	2.29405	5.12646		7.09881	3.28734	3.28558
	yahL	U00096.3:344175-344991		0.162917	0	0.843238		1.18994	0.255557	0		0	0.418763	1.64591		0.393412	0.170442	1.30219		0	0.104938	0
	yahM	U00096.3:345403-345649		7.6191	20.6607	16.842		3.93345	35.2159	34.0504		0	7.90689	23.0983		19.3774	5.24552	31.1667		8.67608	7.29458	8.87643
	yahN	U00096.3:345665-346337		2.34667	4.92297	1.58857		0	0.237495	0		0	0	0		1.01182	0.263068	0		3.65324	1.70595	0.203327
	yahO	U00096.3:346483-346759		8.75352	26.7144	12.3925		30.4845	35.1902	24.4669		24.7873	70.852	88.6282		93.226	43.2957	95.9221		106.426	90.4359	56.1318
	prpR	U00096.3:346856-348443		0.324374	0.430779	0.134144		0.154817	0.0707538	0.187607		0.202888	0.19233	0.778986		0.152317	0.444622	0.109458		1.37389	0.40465	0.43311
	prpB	U00096.3:348681-349572		0.283795	0	0		0	0	0.313957		0	0	0		0.268216	0	0.580912		0.450173	0.122768	1.00486
	prpC	U00096.3:350011-351181		0.129876	0.0818065	0		0	0	0		0.596291	0	0		0.96271	0.856442	0.188614		0	0.288544	0.719717
	prpD	U00096.3:351214-352666		0.241356	0.267204	0		0.163319	0.20419	0.17703		1.22632	1.17849	0.958138		1.68637	1.13416	1.85934		0.802627	0.620111	1.54513
	prpE	U00096.3:352705-354592		0.124084	0.174767	0.480295		0.501587	0.637466	0.293876		0.359054	0.33583	0		1.64749	1.42199	0.575714		0.632514	1.02669	1.0443
	codA	U00096.3:354921-357454		2.84795	4.39112	3.73286		2.66677	4.62344	4.49049		8.83974	3.19307	3.10991		5.3092	4.23216	2.72483		3.1353	2.42783	3.36721
	codB	U00096.3:354921-357454		3.7381	1.0669	2.61213		1.87792	1.31841	2.92142		3.68442	0.845808	4.63762		1.14216	1.4175	1.26867		2.16676	1.7051	1.86871
	cynR	U00096.3:357790-358690		3.27416	2.7143	1.88		2.41699	2.46029	1.66817		2.95485	4.76857	3.61686		5.80813	4.39553	4.11379		4.79517	6.33798	2.68903
	cynT	U00096.3:358798-359458		0	0.359182	0		0	0	0.505148		1.53341	0.544483	0		1.52458	0.715347	2.17188		1.13477	0.917999	0.380707
	cynS	U00096.3:359488-359959		5.1706	1.56698	1.12449		0.835346	2.03409	1.87828		13.362	10.4763	2.54323		9.4156	3.59772	5.84209		14.9067	5.77392	4.16082
	cynX	U00096.3:359991-361146		0.61573	0.240434	0.301392		0.21087	0.703203	0.41976		3.1721	1.9733	2.09404		0.8044	1.16288	2.06899		2.10616	1.28757	1.60802
	lacA	U00096.3:361248-361860		1.24596	0.270504	0.26584		0	0.161627	0.444514		2.65112	2.91908	1.67169		4.2754	2.77422	7.26968		4.23453	6.1767	1.93636
	lacY	U00096.3:361925-363179		0.141826	0.293205	0.130699		0	0.198918	0		2.14257	0.196207	2.18585		1.53286	0.919158	1.422		1.21699	0.841186	1.19565
	lacZ	U00096.3:363230-366305		0.524771	1.66644	2.59154		0.615637	0.704802	2.83099		8.64061	2.44275	3.14596		2.2806	5.76321	2.97618		4.36008	1.71687	3.47172
	lacI	U00096.3:366427-367510		162.24	168.351	159.107		198.423	151.605	282.134		254.603	153.948	177.779		207.543	179.392	123.635		176.95	118.276	184.113
	mhpR	U00096.3:367586-368420		5.60923	5.64789	3.30311		2.59891	2.1536	2.10283		4.98226	3.69826	1.8786		7.01935	8.44608	7.77621		18.6663	18.2966	24.5289
	mhpA	U00096.3:368610-370275		0.356021	0.135096	0		0.133517	0.245771	0.163113		0.175251	0.319094	0.220516		0.671505	0.767576	0.452325		0.680214	0.213476	0.318691
	mhpB	U00096.3:370276-371221		0.11878	0.0858877	0		0.491676	0	0.601718		0	1.69593	1.12681		0.53369	0.45235	0.145793		0.391888	0.698505	0.521186
	mhpC	U00096.3:371238-372105		0	0.0938101	0		0	0.436655	0.313366		1.86261	0.373397	0.391371		0	0.321186	0.920656		0.647595	1.0013	0.267182
	mhpD	U00096.3:372114-374881		0.422967	0.517168	0		0.266803	0.343408	0		0.803718	1.05957	0		1.37832	0.917422	1.98491		1.34491	1.40158	1.49789
	mhpE	U00096.3:372114-374881		0	0.29102	0.208192		0.251653	1.41591	0.981378		1.45314	1.46284	4.35473		2.84415	2.31305	2.45642		2.25318	2.16829	1.58568
	mhpF	U00096.3:372114-374881		0.296689	0.0998511	0.560367		0.284174	0.845963	1.78885		3.5762	4.99352	3.22332		4.21528	2.07415	1.99235		3.97504	2.09908	3.39669
	mhpT	U00096.3:375458-376670		0.553001	0.346775	0		0.228582	0.659866	0.524842		2.89177	1.704	2.33029		3.77852	3.22819	2.5001		1.75873	1.34085	2.46887
	yaiL	U00096.3:376771-377311		20.2846	37.258	26.8198		13.3205	17.2514	25.4866		47.7972	21.2349	19.1005		13.8627	13.6487	23.9628		39.9293	9.39598	13.9984
	frmB	U00096.3:377534-378368		6.96971	8.19795	13.3554		5.37423	8.06826	16.7215		16.2421	7.87524	8.69708		9.74204	12.6015	10.9537		11.6313	6.42922	6.52862
	frmA	U00096.3:378461-379571		39.9982	35.3983	30.8561		29.7689	25.9316	37.1993		43.2561	24.8048	32.1999		26.4632	29.3725	17.4663		23.8961	18.4752	19.9737
	frmR	U00096.3:379605-379881		42.502	48.6513	15.8151		29.1462	23.2707	33.1209		17.6728	10.5196	14.7642		44.869	30.5643	19.4222		30.9103	28.3831	23.4626
	yaiO	U00096.3:380068-380842		0.544448	1.11668	1.3133		0.323848	0.710826	1.14348		13.2102	5.98787	9.10166		14.7069	5.75179	6.70461		8.73293	2.91623	6.69631
	yaiP	U00096.3:380843-383935		0.102197	0.328325	0.336832		0.419911	0.429746	0		1.972	0.521604	0.626588		1.97726	0.701338	1.17487		1.15843	1.34243	0.993045
	yaiX	U00096.3:380843-383935		5.29317	8.16856	5.12664		3.12166	3.34181	5.83925		4.67668	3.71801	4.12364		7.19552	4.07745	4.05426		8.13815	3.08761	3.02122
	yaiS	U00096.3:384058-384616		0	0.38936	0.806899		0	0.246697	0		0	2.96895	0		0	0.638719	1.13356		0.934395	0	0
	tauA	U00096.3:385231-386194		0.145982	0.508622	0		0	0	0		1.74443	0	0		0.463388	0.512982	0.202029		0.236396	0.854218	0.882054
	tauB	U00096.3:386206-388646		0	0.752888	0		0.376688	0	0		4.08328	0	0.581247		1.93103	0.223142	0.285572		1.24916	0.166399	0.512131
	tauC	U00096.3:386206-388646		0	0.0975257	0.283794		1.15587	0	0.390311		2.61494	0	0		0.325122	1.35456	1.1968		0.876174	0.764382	0
	tauD	U00096.3:386206-388646		0.484319	0.421037	0		0	0	0.989932		1.78261	1.26144	0.926415		0.888795	1.33145	1.17199		2.37471	1.47788	0.589068
	hemB	U00096.3:388752-389727		18.7701	13.149	11.154		17.4044	18.2956	17.5034		15.3928	11.202	10.9409		11.3147	10.7582	9.426		10.0064	5.33363	7.84335
	yaiT	U00096.3:390250-394418		1.36824	2.99989	1.73251		1.75312	1.14966	1.35612		1.95803	0.990365	1.71879		1.95257	1.69258	1.69326		2.64602	2.41686	1.58532
	yaiV	U00096.3:394505-395129		0	0.269707	1.98255		0	0	0		0	0	1.42998		0.879657	0	0		0.397389	0	0
	ampH	U00096.3:395129-396287		8.59774	5.60564	4.79122		6.35626	5.6243	6.08435		10.0648	8.80795	9.72923		6.99473	7.4125	5.85888		10.8128	9.82463	10.4131
	sbmA	U00096.3:396638-397859		1.75207	3.38316	3.50624		43.8595	63.3425	118.282		683.66	564.437	696.04		563.756	474.307	442.225		406.319	237.384	260.523
	yaiW	U00096.3:397871-398966		3.53998	3.016	2.51354		15.7541	36.6861	51.724		352.555	292.211	274.231		360.669	298.285	203.222		233.795	211.863	135.7
	yaiY	U00096.3:399024-399333		0	1.1324	0		0	0.706842	2.00807		0	0	0		3.24268	3.13518	2.74388		7.55907	0.57523	2.67069
	yaiZ	U00096.3:399592-399805		275.497	100.701	39.1317		59.1893	30.593	80.3335		197.654	179.412	232.047		341.189	115.41	202.429		442.728	277.983	102.304
	ddlA	U00096.3:399828-400923		23.2744	35.5586	25.3935		29.0445	28.9046	39.5471		34.9178	18.7039	23.5031		10.0599	14.2	10.2051		13.6028	9.84512	11.5772
	iraP	U00096.3:401385-401646		35.1898	45.0384	34.6856		6.35553	17.0005	33.9319		24.4876	35.1342	6.82751		47.5354	44.2023	109.308		114.699	46.0165	58.9133
	phoA	U00096.3:401746-403162		0.778073	3.82052	2.38705		3.1503	3.09739	2.45243		3.34596	3.52023	6.11912		4.17101	5.21271	4.1149		8.11206	7.31942	4.18796
	psiF	U00096.3:403280-403601		0	0.759972	0		1.74801	3.39056	4.47132		0	0	0		0	2.12194	1.4674		5.08055	0	1.55474
	yaiC	U00096.3:403702-404818		0	0.537228	0.150086		0.635464	0.989772	1.08257		3.21865	4.92031	2.49111		4.52901	2.71436	3.18151		2.47419	1.15382	1.42598
	proC	U00096.3:404834-405644		15.8399	27.4949	21.0501		15.2794	15.2471	10.3353		15.1271	4.32308	11.3321		6.37532	7.38391	3.67472		8.15065	7.42746	7.45642
	yaiI	U00096.3:405763-406222		4.14267	4.9829	2.56061		8.22347	4.59646	13.3961		8.46725	6.9365	7.67004		2.74702	3.48257	4.23498		6.97055	0.797072	4.71066
	aroL	U00096.3:406404-406929		15.7122	15.6223	9.01295		20.553	17.8975	11.065		11.5127	15.893	19.71		13.9333	11.9839	12.5482		14.9265	10.8439	7.51755
	yaiA	U00096.3:406978-407170		46.2196	73.3864	39.1557		113.127	106.136	122.279		62.5922	51.4501	82.3978		166.812	72.956	10.4248		37.113	74.8192	85.9042
	aroM	U00096.3:407427-408105		5.6082	5.86094	2.90563		3.54055	3.86375	3.74122		6.15828	2.05731	1.67849		4.47692	5.78986	4.63082		6.51525	3.25978	2.08256
	yaiE	U00096.3:408176-408461		60.4459	168.087	112.546		84.4691	55.8442	63.235		77.1627	69.8425	32.24		66.4134	17.9854	72.7814		50.1834	55.8499	44.0248
	ykiA	U00096.3:408608-408950		4.45245	2.89624	3.38091		1.42494	5.18749	1.76056		6.99875	0	3.16376		12.3945	5.20668	6.02039		7.26167	8.22581	3.79482
	rdgC	U00096.3:409107-410019		35.0677	22.3674	15.5453		24.0822	30.2389	29.9299		17.3681	20.9061	26.5794		19.3002	19.331	9.91979		14.765	10.902	10.9752
	mak	U00096.3:410143-411052		10.2344	8.75079	18.6027		6.10642	6.01586	9.10266		10.6971	2.4939	6.52596		5.25872	9.3111	5.20737		9.43376	3.80522	6.78506
	araJ	U00096.3:411296-412481		1.31653	1.8423	3.141		2.08691	1.71801	1.59811		1.48341	2.36078	1.08566		5.26744	2.37727	2.02794		2.61404	2.5351	1.36458
	sbcC	U00096.3:412606-416952		1.7944	2.42178	1.76242		2.5466	2.32166	3.18098		4.51499	3.5736	3.81513		2.64445	4.19906	2.23902		4.0538	2.90141	3.55026
	sbcD	U00096.3:412606-416952		4.23545	4.77426	5.3378		3.29445	4.57641	5.54684		2.89556	6.63761	3.01678		4.90144	2.73558	3.66836		5.96429	3.35151	3.17019
	phoB	U00096.3:417141-417831		9.19167	11.1329	12.1548		41.2216	53.3003	74.2851		190.525	164.348	231.869		241.404	254.781	264.512		206.331	186.041	171.402
	phoR	U00096.3:417888-419184		2.66171	1.95806	4.51096		11.7627	14.775	16.5741		56.248	68.196	57.0262		78.1799	65.6394	51.2093		57.1336	50.0799	34.7985
	brnQ	U00096.3:419590-420910		6.45138	5.1903	6.76958		6.2216	7.5851	9.89807		15.2717	13.4817	18.8107		26.096	15.4921	12.5217		16.1989	12.3415	11.0675
	proY	U00096.3:420985-422359		9.2492	4.4846	3.79669		12.3483	9.4598	12.0653		11.4335	12.4972	6.95979		20.3356	18.294	9.94567		10.1171	7.2451	6.71562
	malZ	U00096.3:422517-424332		1.12418	2.00308	2.115		1.97443	2.31681	1.48706		2.2911	1.42413	0.469732		2.37068	2.31143	2.17364		1.52233	1.84383	2.22631
	acpH	U00096.3:424336-424918		3.74802	5.00641	3.69915		1.74241	4.45228	5.47238		4.25507	6.50965	2.49989		7.02494	5.20408	4.23663		4.17572	4.82153	4.87897
	queA	U00096.3:425010-426081		10.1916	4.12881	6.16207		8.89658	9.85971	9.3971		4.44562	5.08752	7.3055		8.35703	7.71908	7.07823		5.96379	5.91176	6.25054
	tgt	U00096.3:426136-427264		57.0882	60.2152	43.7344		66.7044	91.1559	83.8636		38.7666	62.2493	68.7632		58.1337	48.4134	41.3235		34.7019	36.3583	26.1814
	yajC	U00096.3:427286-427619		201.885	207.648	179.573		258.856	252.379	425.137		558.212	192.151	242.688		176.84	104.765	124.63		187.225	76.8143	200.378
	secD	U00096.3:427646-429494		74.3791	66.9768	65.6638		95.2387	92.6309	116.564		61.335	56.848	46.7364		57.659	53.6835	36.4923		50.6189	37.1654	36.2853
	secF	U00096.3:429504-430476		45.3647	23.7846	28.8042		52.1161	50.3518	99.2064		72.7199	60.7757	43.9165		72.1518	56.4733	27.721		49.6183	53.4468	43.0825
	yajD	U00096.3:430604-430952		26.6897	40.6311	34.8294		26.9497	25.6022	50.019		12.4295	24.0573	12.2652		21.3914	12.775	22.0324		35.1191	11.1594	31.6631
	tsx	U00096.3:431128-432013		819.812	895.734	421.266		284.284	237.253	166.512		8.51512	26.1931	10.3901		20.9661	15.9713	21.8348		38.3954	49.9386	28.8762
	yajI	U00096.3:432311-432851		3.02934	6.51483	4.01507		0.725925	1.82993	3.12594		0.848969	0	2.17888		2.42237	2.14103	1.01308		1.19772	0.651554	0.700544
	nrdR	U00096.3:433001-433451		30.5653	39.174	55.5208		24.2695	38.7417	30.3226		18.4058	34.3747	15.499		25.6347	24.1103	19.768		23.0193	22.0594	10.5592
	ribD	U00096.3:433454-434558		13.6009	11.7633	18.0567		18.284	16.2791	18.8673		24.6549	10.7452	16.1421		18.899	18.9049	16.9286		18.1709	11.6704	13.2368
	ribE	U00096.3:434646-435117		58.5975	48.4115	46.5955		83.7822	78.405	122.997		149.331	63.2649	91.8542		90.9567	86.6399	107.409		106.528	57.8892	67.8634
	nusB	U00096.3:435136-435556		44.9324	34.0815	58.999		80.9964	147.528	129.027		147.818	130.437	82.0654		104.294	93.4219	111.173		91.0582	114.87	77.6834
	pgpA	U00096.3:435633-437107		25.9764	12.4314	23.7234		11.1361	25.448	26.995		16.1417	10.151	33.0428		27.7149	19.3742	19.7332		18.8063	16.323	15.1945
	thiL	U00096.3:435633-437107		11.1295	5.34096	7.40723		11.5122	14.0911	16.1359		14.1029	4.80138	9.4116		20.4362	10.3005	9.04796		12.5374	10.7524	13.1495
	yajO	U00096.3:437160-438135		2.1459	4.9802	3.80294		4.00456	2.97428	7.1579		11.3229	10.22	4.41942		8.37341	6.26395	3.97328		7.9206	3.60505	7.43057
	dxs	U00096.3:438314-440177		14.0431	14.9092	13.3028		13.987	8.05425	19.6088		14.1752	9.64108	9.10155		12.2113	8.57197	7.48541		10.9193	13.8392	9.47981
	ispA	U00096.3:440201-441343		37.6489	31.3865	23.93		25.8009	24.6146	18.663		31.792	15.2013	10.5286		16.5076	13.5552	15.1412		17.8374	17.5243	16.4178
	xseB	U00096.3:440201-441343		81.0813	99.6353	83.9983		35.5117	21.7851	40.7687		54.2325	40.0236	14.2561		13.9196	46.5833	36.2398		70.6887	22.0245	79.8851
	thiI	U00096.3:441548-442997		18.8874	14.8557	14.2051		24.302	28.5808	43.894		31.9632	14.0025	26.7169		21.6293	19.5804	18.0882		26.1786	15.3478	15.2092
	panE	U00096.3:443050-444515		10.6671	17.7264	14.1039		12.7837	11.1144	9.47639		10.4714	11.7232	6.81535		9.76627	9.07141	6.87642		5.88736	5.26545	4.88359
	yajL	U00096.3:443050-444515		11.6443	11.8371	11.3349		14.748	12.9215	11.437		7.95459	5.93504	5.97773		2.54783	7.48024	1.79935		4.43277	2.77479	6.17773
	yajQ	U00096.3:444682-445174		230.58	145.434	119.068		175.048	70.0458	182.423		124.899	81.3646	94.5904		79.7549	61.4288	60.7291		53.7754	46.2229	43.8977
	yajR	U00096.3:445301-446666		4.81042	4.37075	3.22996		5.22683	5.27669	7.05308		4.37633	5.46378	2.73995		5.54055	3.53208	3.76035		4.74559	3.69588	3.86855
	cyoE	U00096.3:446814-447705		269.765	167.76	226.95		269.826	222.716	304.044		68.0132	111.052	203.241		102.981	125.674	117.178		127.23	112.907	61.9827
	cyoB	U00096.3:447716-450641		186.799	155.703	97.7969		169.615	164.881	138.974		143.624	104.07	105.445		111.452	87.178	62.0174		79.0581	69.6512	47.7738
	cyoC	U00096.3:447716-450641		196.85	215.751	167.76		174.245	240.301	248.341		245.118	199.582	136.753		170.338	123.046	99.2997		136.234	105.749	70.4316
	cyoD	U00096.3:447716-450641		952.465	591.451	452.318		888.149	698.725	566.586		301.509	539.712	417.188		407.451	245.307	272.325		267.034	242.994	164.642
	cyoA	U00096.3:450662-451610		400.851	292.529	196.905		256.761	199.138	328.911		302.356	210.933	189.488		214.496	160.639	130.731		147.83	110.705	93.8749
	ampG	U00096.3:452069-453545		9.53536	8.2249	9.21074		6.83421	8.1902	10.4656		8.43118	3.15002	5.31217		8.05959	7.58684	5.52378		7.91911	6.34199	6.34111
	yajG	U00096.3:453588-454167		103.45	121.68	55.5824		96.6471	93.5671	95.7166		119.494	45.8389	48.3337		72.6414	60.9201	46.0465		83.4928	64.3195	37.7122
	bolA	U00096.3:454471-454789		84.0788	194.753	131.583		94.7302	54.9382	141.176		74.041	73.1048	20.4525		65.5856	57.5915	68.8126		98.4587	44.9486	48.4938
	tig	U00096.3:455132-456431		176.778	93.6872	81.3055		138.405	115.668	184.231		181.616	119.909	99.6051		105.459	160.934	65.8159		95.638	57.6991	109.239
	clpP	U00096.3:456676-457300		141.641	262.221	286.798		350.098	352.77	332.26		788.142	678.747	1113.55		1300.26	1272.97	1216.71		975.202	1336.03	667.542
	clpX	U00096.3:457425-458700		84.6653	126.498	145.067		220.631	299.307	408.08		1470.7	1156.77	1402.09		1691.51	1454.07	1531.11		1694.19	1160.59	1146.16
	lon	U00096.3:458887-461242		81.5886	108.768	132.441		184.073	167.087	93.9234		317.078	268.954	332.463		662.193	469.168	426.299		414.427	423.785	299.048
	hupB	U00096.3:461450-461723		938.314	1051.73	1077.41		1132.53	935.498	1520.15		436.179	368.911	384.149		370.874	642.41	598.436		565.8	343.09	458.123
	ppiD	U00096.3:461914-463786		38.3146	32.8649	33.6241		34.1137	39.8875	44.3164		52.6819	28.1434	48.0515		36.3352	44.6708	36.2153		38.5915	24.6082	26.7071
	ybaV	U00096.3:463936-464308		14.1079	21.422	8.57808		34.845	34.0773	31.4401		49.5746	45.8028	57.1308		40.0677	32.2815	29.6788		22.1298	8.44801	14.7559
	fadM	U00096.3:464401-464800		2.11642	4.95168	12.447		3.57135	2.08718	1.70986		26.4912	21.4279	19.2952		12.9023	10.8428	10.1195		7.16439	14.3847	12.474
	queC	U00096.3:464851-465547		16.8729	17.0994	16.9703		14.4688	18.4504	17.5058		15.5633	10.1121	15.232		11.9064	12.8347	6.87027		16.2327	6.73578	10.2975
	ybaE	U00096.3:465611-467312		2.14078	2.36546	0.445726		0.691401	0.601572	0.469324		0.917147	0.359136	0.690145		0.617721	1.0523	0.525059		1.33592	0.933316	1.29835
	cof	U00096.3:467411-468230		4.39825	8.83097	8.79365		8.12737	10.6357	13.9606		11.2518	18.3083	10.456		20.1687	13.539	12.4786		23.9366	12.1029	11.8105
	ybaO	U00096.3:468382-468841		13.8753	9.45946	9.80002		8.91283	6.30986	5.04279		5.81494	4.0422	5.5545		11.7372	4.94889	4.98519		2.93374	3.04224	5.11674
	mdlA	U00096.3:468870-472417		6.42243	6.01692	4.0221		6.20356	8.4146	6.28982		5.84071	5.60565	8.4463		5.57363	3.99126	4.7581		5.97033	4.96973	2.68693
	mdlB	U00096.3:468870-472417		2.44932	1.1518	1.63887		4.51999	3.51922	4.28686		2.3204	2.11084	1.33297		1.60137	2.92749	2.86707		2.22993	2.13546	1.58598
	glnK	U00096.3:472597-472936		0.737442	0	0		0	0	0		0	0	0		1.21154	0.830851	2.80261		1.14692	0.590533	2.50439
	amtB	U00096.3:472965-474252		1.06288	1.11065	1.59052		1.45745	1.45498	2.06213		2.0332	1.37175	1.40618		1.85933	1.51342	0.918379		0.970785	0.907009	1.40232
	tesB	U00096.3:474300-475161		7.50256	11.3323	9.34086		5.44439	7.91836	8.85787		10.418	4.96479	4.37748		5.97522	5.93464	4.15625		3.5123	4.89637	4.89056
	ybaY	U00096.3:475378-475951		4.72687	11.034	7.97687		7.40024	9.06934	9.02387		8.62448	4.71376	3.41644		5.25177	4.50241	5.81099		2.21709	2.96913	1.9995
	ybaZ	U00096.3:475981-476371		1.97873	8.0253	9.01646		6.90471	2.03804	3.00147		4.85285	0	6.30468		3.41054	3.17116	5.34552		4.73595	4.067	4.0007
	ffs	U00096.3:476447-476561		227466	132776	188260		212260	157822	449999		375378	204936	268384		377583	309404	218213		216428	245011	244355
	ybaA	U00096.3:476671-477025		1.68982	1.1356	0		0	4.04267	3.59442		11.5849	3.61413	8.25653		2.98713	15.8372	2.50703		5.31998	1.6364	3.89345
	ylaB	U00096.3:477066-478617		3.07324	2.41015	1.72371		3.84593	3.41986	3.82917		2.85104	2.63525	8.55139		2.99221	4.99901	7.28199		5.84203	4.83038	2.07432
	ylaC	U00096.3:478780-479251		9.35206	10.7948	16.3316		5.8509	14.3131	27.3214		41.852	18.335	23.0063		29.5986	14.9414	6.85476		25.4899	12.0057	9.4082
	maa	U00096.3:479366-479918		27.7474	20.7565	11.3082		12.9927	12.4232	16.8931		3.22639	4.09162	6.73492		12.22	6.78543	18.974		19.1262	12.4717	26.4142
	hha	U00096.3:480089-480308		98.4838	99.8889	147.122		117.331	95.6665	131.329		57.0445	44.8789	21.4568		57.9816	58.5831	63.1478		106.147	49.8662	62.6683
	tomB	U00096.3:480333-480708		32.8349	41.2687	40.5279		55.6656	44.4254	16.425		5.39565	19.0571	9.7635		28.5198	13.7593	6.26217		28.1575	22.978	9.30023
	acrB	U00096.3:481253-484403		40.2687	29.3838	31.0803		48.8512	48.6991	47.3378		40.4843	33.6879	36.9722		39.4993	31.4161	27.6697		30.7375	34.8885	24.878
	acrA	U00096.3:484425-485619		60.5738	59.581	53.6038		80.2044	69.4908	76.8094		70.6158	54.4706	61.9218		72.3165	42.9099	34.5676		34.8506	44.3085	39.3439
	acrR	U00096.3:485760-486408		11.083	8.26401	10.5734		5.00235	7.81876	6.94717		6.3604	1.87963	4.49246		3.09061	4.55729	3.11232		8.83241	5.63099	6.25848
	mscK	U00096.3:486535-489898		7.34758	4.94718	4.70694		9.25959	9.21656	8.00922		5.69197	5.81833	7.55923		5.43193	4.49012	5.89747		6.95067	6.52074	4.07575
	ybaM	U00096.3:490109-490271		39.6697	55.7692	25.1725		46.0222	91.5028	124.413		0	58.9585	103.733		79.3668	158.182	71.2137		193.647	41.369	41.1983
	priC	U00096.3:490284-490812		1.45749	1.89599	8.5813		5.03627	4.35949	4.45554		9.36067	2.26183	0		1.6747	2.79847	0.883814		8.65697	4.15834	3.61659
	ybaN	U00096.3:490881-491259		7.23008	3.51913	0.70881		1.33629	8.03122	2.89785		1.81062	5.22319	3.26015		3.36928	0.666407	1.33264		4.08228	2.12077	2.3664
	apt	U00096.3:491411-491963		46.4738	18.5657	12.0221		53.419	42.4244	73.4241		122.232	46.1381	64.1131		59.8499	98.3421	27.6952		64.2746	25.644	60.3605
	dnaX	U00096.3:492091-494023		16.6625	8.90286	12.0242		15.354	17.6063	21.2835		35.6478	26.4994	41.4975		33.6873	43.2882	38.0329		40.0385	31.8885	30.4023
	recR	U00096.3:494075-495010		18.5707	14.5587	23.5953		16.7201	26.3179	32.9339		74.7548	65.8074	103.113		58.8638	99.9695	114.947		80.6087	71.9238	76.2819
	ybaB	U00096.3:494075-495010		137.292	138.469	143.493		220.098	172.174	384.109		1019.34	571.167	569.782		571.998	862.052	448.822		825.341	407.889	869.645
	htpG	U00096.3:495119-496994		88.0188	183.936	197.863		191.735	176.429	120.708		277.163	118.522	93.384		565.887	507.822	331.215		498.654	489.113	471.103
	adk	U00096.3:497174-497819		119.116	67.562	79.5522		124.07	110.992	176.834		138.155	83.363	99.8985		129.494	118.25	62.7893		108.073	64.6287	106.169
	aes	U00096.3:498054-499973		2.13495	3.54164	2.8897		0.606767	1.79245	0.293486		1.63474	1.52686	0.535403		0.261006	0.483461	0.210068		0.508493	0.196511	0.594085
	hemH	U00096.3:498054-499973		5.55857	6.97624	6.28325		6.40532	6.32116	5.70608		6.20121	4.99465	6.13051		1.48283	3.70921	5.22206		3.85118	2.14041	5.24655
	gsk	U00096.3:500124-501429		19.3774	10.4941	13.5296		21.4322	21.6038	34.6085		21.2809	13.2295	17.3456		18.0545	14.392	11.8154		17.739	17.03	12.3355
	ybaL	U00096.3:501561-503238		8.35594	9.13822	9.76243		9.3637	9.8281	9.5426		15.039	12.0669	7.19307		12.6533	9.89945	8.46004		10.2135	8.24435	10.9247
	fsr	U00096.3:503475-504696		4.01884	9.03268	5.80759		1.80737	3.92282	5.14455		0.850838	4.87936	1.23706		6.35077	2.59524	3.01398		2.49952	2.79984	3.80511
	ushA	U00096.3:504913-506566		11.0636	21.4713	15.2562		10.3007	10.9661	12.3054		10.5751	6.67036	13.712		12.9975	11.6086	7.49888		11.9626	7.03705	8.38888
	ybaK	U00096.3:506602-507082		11.8708	13.4356	9.19375		11.5858	11.5474	22.3292		9.88354	11.9237	7.3257		10.313	10.6696	3.88978		6.5766	7.61557	8.17886
	chiX	U00096.3:507203-508080		4511.74	8362.3	2152.99		3835.13	4451.93	16628.1		1240.93	11672.1	4262.89		4031.63	4689.72	6826.66		3416	7710.02	1350.17
	ybaP	U00096.3:507203-508080		2.22553	4.6975	3.73869		1.44753	1.55632	3.77458		4.27194	0.714407	0.964003		2.08476	1.96583	0.214755		2.07202	0.832101	3.38565
	ybaQ	U00096.3:508217-508559		9.22182	25.6313	22.3016		2.78806	4.76466	4.98041		0	1.14621	2.79547		1.85846	4.52595	9.65827		6.51967	3.16439	4.61657
	copA	U00096.3:508874-511379		3.9247	5.41404	6.61586		4.45024	8.0095	5.28003		7.80105	5.53176	7.15318		6.52495	5.88438	4.99185		5.28955	4.88139	4.80458
	glsA	U00096.3:511640-512573		0.718588	1.88831	0.568249		0.342013	3.20051	4.14277		16.1229	5.1416	11.4114		10.5462	10.7468	6.97643		16.0958	6.87388	9.51926
	ybaT	U00096.3:512575-513868		0.508959	0.691391	2.53521		1.04087	1.23858	1.17397		5.06196	4.13762	3.53274		3.84868	4.09403	3.89634		4.4205	4.40123	3.09178
	cueR	U00096.3:513992-514400		1.86719	5.43411	8.38925		2.35809	1.37684	4.48073		2.43754	0	1.49202		4.8204	4.17801	5.1853		6.72846	4.9209	2.57155
	qmcA	U00096.3:514400-515773		5.33557	6.95072	8.25549		5.09752	7.30606	10.5678		18.6027	21.1162	17.6987		19.6388	22.1022	17.9899		17.9573	11.6541	14.218
	ybbJ	U00096.3:514400-515773		12.0683	9.08018	10.9904		12.666	13.4645	14.2481		66.2272	38.072	41.0901		37.994	33.164	24.1491		26.9173	20.1126	27.065
	fetA	U00096.3:515918-517362		6.59983	12.2621	4.46794		6.42414	7.09285	5.16778		6.64674	2.96116	6.37353		5.75868	1.23035	5.00793		5.32213	3.35715	2.11211
	fetB	U00096.3:515918-517362		5.21386	8.85442	14.9268		8.89364	9.49799	10.4104		0.499222	7.70621	3.12352		0.810997	2.73299	2.38624		1.44748	4.05826	1.76307
	ybbN	U00096.3:517424-518279		28.2098	70.4455	113.988		59.2497	59.3053	40.5254		90.5375	38.1383	45.596		151.946	169.294	125.448		141.824	98.9187	172.558
	tesA	U00096.3:518339-522830		1.86854	6.11357	6.76529		3.60891	4.4257	4.46378		2.36038	4.81352	4.13075		3.27946	1.38075	2.33553		8.06437	2.50205	3.21362
	ybbA	U00096.3:518339-522830		3.11838	5.04023	5.35802		3.29534	2.68285	3.14039		16.257	4.05087	3.75951		6.57161	4.98778	5.35412		6.14687	6.04533	5.32923
	ybbO	U00096.3:518339-522830		13.5813	24.4458	27.2444		17.4233	14.7709	15.984		15.24	12.6991	30.7506		20.1551	22.6673	15.4029		21.9815	16.1167	17.3478
	ybbP	U00096.3:518339-522830		0.897705	2.57821	1.09214		1.8938	1.95707	2.15339		2.00621	1.41784	0.780749		3.4429	1.95537	1.1345		2.69817	1.45025	2.32281
	rhsD	U00096.3:523260-527541		0.571114	0.476678	0.809184		0.589658	0.612373	1.35222		4.84427	1.99936	2.86545		2.9107	3.95017	2.85072		2.86784	1.57398	2.20531
	ybbC	U00096.3:527580-527949		6.61794	5.58435	4.87782		0.943027	3.15787	7.04862		4.73968	4.02338	0		3.46905	2.04237	0.789648		8.85041	1.1209	0.765681
	rhsH	U00096.3:527951-529130		1.4468	0.960844	0.369794		1.16962	0.565369	1.48674		0	3.16702	1.38843		1.61703	0	1.41832		2.57531	3.62555	1.55159
	ybbD	U00096.3:527951-529130		0.854349	0.932275	0		0	0	0		2.62992	0	0		0	0.397206	1.86489		1.51381	1.20541	1.55612
	ylbI	U00096.3:529499-529592		0	0	0		0	113.751	0		0	0	0		0	0	0		0	0	0
	ylbG	U00096.3:529594-530016		0.472811	3.80433	6.34645		0.990045	5.59874	1.10698		2.8847	2.41523	6.51419		8.76337	4.53769	4.29902		6.35552	3.55532	1.69622
	mnmH	U00096.3:530131-531226		1.08736	1.95601	0.892106		1.2993	0.677419	1.03504		3.57471	0.77765	0.170548		1.85479	0.923664	1.3121		2.11219	0.687929	1.80295
	allS	U00096.3:531294-532221		0	0	0.51817		0	0	0.730238		0	0	1.54461		0.270278	0	0.703224		0.257949	0.367461	0
	allA	U00096.3:532450-532933		3.90313	3.08391	0		4.19514	0.351561	1.99849		0.971219	0	1.25945		0.771798	1.9519	2.52668		2.76395	2.44308	0.396597
	allR	U00096.3:533010-533826		40.1939	48.8947	52.3753		52.9928	55.4277	55.5506		57.8446	34.0198	44.6727		37.2873	18.3691	20.4455		24.3965	17.0343	18.3514
	gcl	U00096.3:533915-535697		0	0.236117	1.15227		0.124431	0.212558	0.286193		2.048	1.48408	2.61389		1.81957	1.21672	0.677659		0.987184	1.18032	1.13664
	hyi	U00096.3:535709-536486		0	0	0		0.293133	0	0		0	0.351707	0		0.623118	0.697343	0.181853		1.01779	0.971105	0.380531
	glxR	U00096.3:536585-537464		0.475474	0.793478	1.13189		1.77972	0.764629	1.03888		3.6336	1.79975	4.50108		5.13802	3.02334	3.65827		4.59593	1.811	3.11359
	ybbW	U00096.3:537632-539087		0.0872093	0.156731	0.571719		0	0	0		0	0.207439	0.278592		0.390382	0.372624	0		0.581659	1.49433	0.591466
	allB	U00096.3:539146-540508		0	0.0544695	0.420662		0.162203	0.347621	0.50928		3.56263	2.11894	0.495007		2.18727	2.12881	1.17864		2.86899	2.33232	2.13841
	ybbY	U00096.3:540564-541866		0.340958	0.172926	0		0.596406	0.18894	0		0.258899	0.534165	0.955878		0.963955	0.772582	0.698815		1.15826	1.78293	0.184428
	glxK	U00096.3:541887-543033		0.632815	1.12137	1.39031		1.66905	1.24243	1.36256		1.93022	1.88304	4.8596		3.14731	4.88134	3.57266		3.31227	3.10708	5.15306
	allE	U00096.3:543260-544046		2.3809	4.45995	4.44771		3.72053	4.82721	4.54863		5.69354	7.99093	6.07799		12.2031	8.48201	12.3969		7.5431	7.22465	5.98024
	allC	U00096.3:544056-545292		0.375659	1.02444	1.09548		0.775154	1.30772	0.209856		4.29449	1.33902	2.37983		2.23696	2.46257	1.36512		5.48011	1.58381	2.70097
	allD	U00096.3:545313-546363		0.39229	0.570826	0		0.252371	0	0		0	0	0.894402		0.249155	0.409597	0		0	0.482606	0.188326
	fdrA	U00096.3:546679-548347		0	0.0481863	0.379488		0.270274	0.121985	0		0	0	0.240222		0.46611	0.259464	0		0	0	0.212843
	ylbE	U00096.3:548356-549616		0.357184	0.469072	0.789414		0.682916	0.340504	0		0.581211	0.595516	0		0.483609	0.851871	1.21489		0.595895	0.267642	0.445959
	ybcF	U00096.3:549626-551332		0.456438	0.322033	0		0	0.716258	0.400794		2.29373	0.910309	0.550176		1.74176	0.791792	0		0.818942	0.259604	0.703866
	ylbF	U00096.3:549626-551332		0	0.467887	0.569097		0.394033	0.188111	0.418831		0	0	0		1.26948	0.398286	0		0.306706	0.155038	0.145822
	purE	U00096.3:551526-553100		2.7821	0.831882	1.29251		5.62903	6.20788	7.97766		13.2968	2.86481	6.50772		2.60972	7.48353	1.56815		8.51553	1.22736	7.35964
	purK	U00096.3:551526-553100		1.99687	2.69159	3.44848		5.32908	3.07416	4.52035		3.81777	3.48159	2.61416		3.09086	3.109	2.61033		3.47069	2.00592	3.46529
	lpxH	U00096.3:553217-553940		12.9166	8.42316	8.89683		9.71962	12.5696	15.3339		27.8787	8.39215	8.47881		9.54202	8.45611	3.36681		5.76524	7.28541	5.99607
	ppiB	U00096.3:553942-554437		494.753	510.129	412.273		533.208	148.215	361.143		244.866	187.874	262.851		159.947	192.607	216.378		99.7695	145.644	106.146
	cysS	U00096.3:554610-555996		18.5063	15.109	14.5224		20.4856	17.5819	28.4843		38.4722	22.8617	34.1539		36.1232	35.143	21.9925		26.012	14.7059	22.7652
	ybcI	U00096.3:556031-556553		0.312145	0.380353	0		0.677918	0.657275	1.36008		0	0.843254	1.04015		0.772988	0.35082	0		0	0.554487	0.298754
	ybcJ	U00096.3:556660-556873		6.44202	4.51624	5.27642		11.8401	3.43493	6.7711		22.7342	7.89341	10.8607		0	0	5.61308		5.71039	5.08156	2.95897
	folD	U00096.3:556874-557741		11.8192	10.9903	11.1147		14.4786	7.5688	20.4664		12.5082	3.22152	12.0712		4.00025	12.7697	10.2753		11.7635	4.97992	7.72205
	sfmA	U00096.3:558211-558754		0	0	0		0	0.385511	0		0	0	0		0.392854	0.337798	0.448319		0.460269	0.825014	0.474156
	sfmC	U00096.3:558973-559666		0	0	0		0	0.385213	0.44373		0.489375	2.77501	0.646488		3.26016	1.53462	1.71164		2.89707	2.71554	0.677715
	sfmD	U00096.3:559696-562300		0.607851	0.309638	0.218428		0.329735	0.368696	0.203515		0.400211	1.22044	1.12601		1.83806	0.514178	1.16182		1.59227	1.2527	1.23453
	sfmH	U00096.3:562335-563319		0	0.11324	0.277839		0.324366	0.320479	0.722872		0.725882	1.93387	1.68038		3.12119	1.26336	3.61752		2.27136	2.56341	1.51049
	sfmF	U00096.3:563329-563845		0.448898	0.619019	2.77037		0.735439	0.289301	0		2.93323	1.25022	3.90533		1.69947	2.64405	0.509876		2.64518	2.20399	3.62249
	sfmZ	U00096.3:563847-564480		0.499775	0.178091	0.387723		1.02087	1.42362	2.16802		2.25597	8.14513	9.28765		15.3881	3.55349	4.50546		15.2414	10.1948	3.98784
	argU	U00096.3:564722-564799		120269	69867.4	87035.3		75346.6	58585.7	71080.6		120195	113370	120715		41278.2	49211.3	95948.6		48337.6	34711	44908.5
	intD	U00096.3:564814-566079		4.17843	10.4799	6.11114		7.3452	5.11582	6.83238		13.1866	5.81165	4.77851		9.76778	10.239	8.09408		14.1678	7.97515	11.729
	xisD	U00096.3:564814-566079		54.3721	41.2318	57.0083		24.3845	24.9546	11.1191		10.1708	39.3325	14.2526		0	42.9311	77.1981		9.34892	10.5795	22.0855
	exoD	U00096.3:566097-568247		0	0	1.94845		5.37685	0	0		0	20.5548	8.9638		4.97783	19.4756	16.8797		7.3228	6.20389	5.57978
	peaD	U00096.3:566097-568247		0	0	0		0	0	0		0	0	0		1.56963	0.799043	1.7553		1.05781	0	2.96304
	renD	U00096.3:566097-568247		6.72423	7.9247	3.84592		4.94485	5.2217	12.5702		7.19207	4.6049	6.30238		7.1361	8.51131	8.04927		15.1295	3.65193	7.46583
	emrE	U00096.3:568314-568647		19.1782	11.7601	7.30105		6.8347	21.3857	12.1229		12.403	25.3781	19.9226		16.7418	20.8817	9.14494		20.5766	11.7625	5.39827
	ybcK	U00096.3:568901-570428		0.0708296	0.137995	0		0.254426	0.246231	1.4092		0.336071	0.5243	1.03105		1.16069	0.603341	0.817432		0.918187	0.350525	0.320882
	ybcL	U00096.3:570892-571444		0.258814	0.513443	1.14384		0	0.592585	0.485291		0.926845	0.994283	0.79472		1.56254	1.37412	1.05017		0.827386	0.461845	0.7411
	ybcM	U00096.3:571453-572251		1.6784	2.88793	1.90649		1.24779	1.35333	2.78336		0	0.743338	3.23169		1.44082	0.425608	0.915877		4.22732	1.46414	1.36107
	ninE	U00096.3:572367-573870		0	0	0		0	0	0		0	0	17.6318		0	0	0		18.072	13.1625	9.93524
	rusA	U00096.3:572367-573870		0	0	0		0	0.475358	0		0	2.97249	0		1.9892	2.39446	0.800456		0.734018	0	1.97115
	ybcN	U00096.3:572367-573870		0	0.201787	0		0	0	0.73754		0	0	0		1.51029	2.23131	0		1.4944	0.616464	0.39513
	ybcO	U00096.3:572367-573870		0	0.579278	0		0	0	0		10.2095	2.42783	11.7194		12.2771	1.2205	1.65597		5.08178	0	3.78013
	ylcG	U00096.3:572367-573870		0	0	0		0	0	0		0	0	0		0	0	0		0	0	0
	ylcH	U00096.3:572367-573870		33.571	139.221	0		0	48.275	123.535		162.216	65.1394	0		106.156	0	36.7249		44.9016	73.1713	0
	quuD	U00096.3:573955-574339		0.292982	1.95082	4.60906		0.49875	0.200638	0		15.5065	10.558	7.73294		7.30043	4.1556	2.63354		6.79211	7.4011	2.75735
	nmpC	U00096.3:574528-576825		253.778	344.341	284.679		73.513	52.1362	49.9667		9.53721	15.4635	18.5326		11.9436	9.80989	12.4949		10.6856	13.7291	9.49811
	essD	U00096.3:577397-578568		0	7.66709	0		0	2.59634	0		24.4782	9.54601	7.77909		16.6609	8.83961	33.5677		24.5053	1.85534	6.63627
	rrrD	U00096.3:577397-578568		0.7651	2.81414	4.73634		0.613738	4.61925	2.67551		5.39354	5.11457	5.08029		1.41452	4.30008	2.34451		5.99931	3.91743	2.14275
	rzoD	U00096.3:577397-578568		0	0	10.238		0	0	0		0	0	73.6602		19.4385	0	19.2969		35.7055	0	11.4651
	rzpD	U00096.3:577397-578568		0.444461	2.62913	0		2.59601	2.78473	1.75004		4.50142	3.68691	4.14219		11.7551	3.57898	6.406		10.5849	8.25362	4.8466
	borD	U00096.3:578599-578893		567.61	365.815	661.974		677.807	855.371	906.737		498.672	373.515	516.292		299.144	351.088	460.953		589.611	378.862	300.002
	ybcV	U00096.3:579183-579594		0	0.313859	2.44632		0	0.868771	0		0	0	0		0	0	0.612742		1.20747	0	0
	ybcW	U00096.3:579879-580086		5.19228	33.1411	16.5416		13.8489	12.3184	23.9941		0	0	7.95814		28.6494	2.63159	27.0919		36.3772	2.97413	11.0475
	ylcI	U00096.3:580250-580445		6.25842	91.4697	0		0	0	0		0	0	0		0	5.96028	0		8.96507	0	14.0674
	aaaD	U00096.3:580833-582097		0	1.03498	0		0	0	0		0	6.91142	0		0	0	2.53126		1.39963	0.780833	0
	nohD	U00096.3:580833-582097		0	0.769369	0.413473		0	0.588968	0.624589		1.51556	0	0.896714		0	1.3849	0		1.4385	1.01728	2.71159
	tfaD	U00096.3:580833-582097		0.903495	0.173763	0		0.618562	0.463665	0.809632		0.946863	4.1852	1.13343		2.94901	1.33731	1.50189		1.95115	4.07611	1.09068
	ybcY	U00096.3:582151-582806		1.28258	2.93843	0.645884		1.52918	1.13212	2.0588		0.531081	0.946431	0		3.7906	1.25088	1.37414		2.81983	2.82266	1.72571
	tfaX	U00096.3:582952-583135		5.0423	10.8352	24.3213		0	10.5709	12.6924		0	0	45.2091		35.3638	0	8.05435		18.1128	4.60994	6.15311
	appY	U00096.3:583680-584430		2.52564	4.79417	6.84395		2.71418	3.67924	3.43081		1.53775	0	1.13153		0.274578	0.188008	2.64135		1.84966	1.38815	0.121981
	ompT	U00096.3:584679-585633		320.953	574.885	493.387		361.084	567.944	550.254		274.574	347.008	356.589		232.492	142.856	201.596		277.681	198.251	152.324
	pauD	U00096.3:586056-586101		537579	429744	285822		351715	289953	143023		42604.9	473300	491479		5437.27	262117	482157		208755	262618	139883
	envY	U00096.3:586146-586908		0.51991	0.112593	0.207206		0	0.543563	0		1.79727	0.239524	0.934886		1.18434	0.732478	0.595485		1.91	0.799719	0.915527
	ybcH	U00096.3:587090-587981		2.43876	1.05834	1.53774		1.54702	1.27605	1.59777		1.76724	0.745455	1.55018		3.05387	2.1659	0.62235		1.57328	2.45457	2.39802
	nfrA	U00096.3:587981-593178		1.27384	0.97132	1.46453		1.00468	1.35727	1.41711		3.28009	2.02793	1.86528		1.86297	3.4047	2.03299		2.04165	2.0047	1.93722
	nfrB	U00096.3:587981-593178		0.703588	0.758267	0.206395		0.695587	1.03632	1.17178		0.368174	1.45356	0.282034		1.16288	1.73836	1.61158		1.80994	1.27478	1.70217
	cusR	U00096.3:593327-595443		3.40506	2.14535	1.06869		2.23801	2.31409	3.56422		5.19479	3.23254	7.3523		5.33617	4.18117	5.28054		7.53876	3.35245	5.81909
	cusS	U00096.3:593327-595443		3.96644	3.1334	1.0911		2.85434	4.19195	5.01951		2.62831	3.64957	3.26907		3.75187	4.53803	3.41571		3.01577	3.67252	2.56357
	cusC	U00096.3:595599-596973		0.291351	0	0		0	0.231193	0.206102		1.57041	1.44693	1.56409		1.92079	1.06732	3.20924		0.716915	0.634311	0.53376
	cusF	U00096.3:597130-597463		0	1.06163	0		1.93334	0.901717	1.35612		7.40705	3.76062	3.95489		9.92404	8.13803	7.56343		15.3774	3.76505	6.90105
	cusB	U00096.3:597478-598702		0.535106	0.261599	0.410133		0.402497	0.743279	0.987333		1.38024	1.28701	1.03688		1.73513	1.72468	1.5334		1.0778	1.59899	1.24337
	cusA	U00096.3:598713-601857		0.28441	0.144115	0.100353		0.3098	0.187804	0.463469		0.50194	0.333157	1.23485		1.19606	1.11298	0.956662		0.955868	0.929099	0.961164
	pheP	U00096.3:601958-603335		7.91331	3.30857	4.32604		7.33147	10.219	8.98855		8.33986	9.9587	6.05873		6.22993	4.17119	5.58827		6.12865	4.56486	3.55998
	ybdG	U00096.3:603415-604663		15.6813	15.211	14.5005		15.167	12.8218	13.8804		18.1699	8.86447	7.58587		6.22245	8.9884	8.07544		9.27981	6.97583	5.77254
	nfsB	U00096.3:604770-605424		44.067	42.1167	61.3774		42.8016	40.4996	73.7355		79.7145	37.5636	37.4271		19.1422	27.684	19.0714		20.0266	10.0197	22.4847
	ybdF	U00096.3:605517-605886		8.28772	22.1947	19.6551		5.74544	18.2448	18.3382		8.96238	10.3229	9.4564		15.3208	5.03278	1.20394		12.0451	8.0344	11.8077
	ybdJ	U00096.3:605950-606199		23.4628	5.97336	14.4159		6.8414	24.329	9.8624		13.8735	4.18555	4.30141		15.6267	5.42624	28.7279		12.2413	8.13999	8.35615
	ybdK	U00096.3:606264-607383		0.118144	2.35597	2.18406		1.44436	1.98563	0.583776		0.819208	4.21487	3.31716		2.47004	1.14137	0.685708		3.81451	1.75751	1.20717
	sokE	U00096.3:607733-607792		0	0	0		0	0	0		0	0	0		0	0	0		0	539.166	0
	hokE	U00096.3:607835-607988		0	0	0		0	7.05484	32.0086		25.8339	0	40.6245		17.4332	0	66.0384		20.9352	0	5.14947
	entD	U00096.3:609458-610079		1.42992	0.288576	0.436308		0.971322	0.874583	0.577939		0	0	0.837147		1.4848	0.548212	1.04662		0.42785	1.23232	0.436296
	fepA	U00096.3:610253-612494		4.44438	1.87012	0.869702		1.17459	1.12533	0.608446		2.12865	1.82516	0.891848		1.79267	1.85468	1.11337		2.43519	1.17791	1.5321
	fes	U00096.3:612736-613939		0.90932	0.785556	0		0.372182	0.0885659	0.374435		3.77773	0.263797	0.907949		1.67239	0.860003	0.824036		0.132412	0.650544	0.287875
	entF	U00096.3:613941-618038		1.95112	1.71098	0.968811		1.0021	0.976358	0.200072		0.679636	0.990152	1.36867		2.00426	1.39734	1.93271		1.57657	1.64836	1.42569
	ybdZ	U00096.3:613941-618038		9.06719	14.5005	5.34959		0	6.42751	16.2976		0	10.4254	36.3356		7.64384	8.43497	5.86209		0	2.70789	0
	fepC	U00096.3:618253-622189		2.19334	1.09581	1.39238		1.028	1.63869	0.61766		0.887411	0.328217	0.365054		2.05744	1.34694	0.633464		0.33156	1.25154	0.590448
	fepD	U00096.3:618253-622189		2.14491	1.56801	0.640243		0	0.78597	0.296508		1.04051	0.340007	0.434621		1.16219	0.293174	0.535958		0	0.104487	0
	fepE	U00096.3:618253-622189		0	0.217865	0		0.198391	0.248063	0.249194		0	0.22746	0.311981		0	0.116134	1.00761		0.174759	0.0822859	0.0913817
	fepG	U00096.3:618253-622189		1.16799	0.881058	0.382423		0.252975	0.454919	1.02734		0	0.674206	0		0	0.529029	0.506399		1.42801	0.377506	0.23663
	entS	U00096.3:622299-623550		2.97056	0.822562	1.10272		1.22329	0.556754	0.913942		0.35813	0.691459	0		0	0.224663	0.275592		0.17566	0.0586138	0.168953
	fepB	U00096.3:623553-624510		2.55313	3.604	2.5921		1.7201	1.99816	1.36297		2.09478	1.47852	0.455172		1.9444	1.5389	1.59793		0.470656	0.62019	1.39403
	entC	U00096.3:624884-626060		3.56075	1.32112	0.159196		1.80148	1.44835	0.230585		1.01477	1.36766	1.38245		0.475287	0.653587	0.33607		0.345639	1.02058	0.531596
	entE	U00096.3:626069-627680		2.94495	2.20395	1.06483		2.07626	0.82458	0.860747		3.32137	1.75351	2.11505		1.61927	0.954605	0.727689		1.37433	1.97826	0.497958
	entA	U00096.3:627693-629297		2.51421	2.16557	2.8214		2.06066	1.8658	0.499599		1.56562	1.82536	1.46283		2.12952	1.33128	0		1.39124	1.38409	3.14924
	entB	U00096.3:627693-629297		3.54368	1.88806	0.826541		1.35488	1.31449	0		1.55561	1.73898	2.79447		3.02932	1.10524	2.20381		1.77763	2.06101	1.44372
	entH	U00096.3:629299-629713		2.47282	1.34912	5.02041		4.46517	0.869188	1.12319		7.21764	2.91572	1.63772		1.15167	2.38968	8.56813		4.7966	2.3063	5.06269
	cstA	U00096.3:629893-631999		8.51288	13.5283	5.15632		3.84011	3.15954	2.14686		4.29572	5.6728	3.39008		4.73577	3.46522	4.04478		9.73032	16.3085	12.9511
	ybdD	U00096.3:632181-632379		171.848	100.648	58.8178		10.1879	5.58545	40.6061		10.9709	0	0		29.6633	19.7608	67.4804		28.2768	41.3247	116.231
	ybdH	U00096.3:632388-633477		1.24234	4.10619	1.83019		2.78773	1.79914	2.84363		1.87312	1.59107	3.3099		2.3659	2.23416	2.51199		2.50199	2.32427	1.50843
	ybdL	U00096.3:633585-634746		1.54902	2.32692	3.61021		1.31618	1.45463	1.67103		0.956804	3.66293	2.2049		1.35428	1.66156	2.40359		2.76959	2.13791	1.24629
	ybdM	U00096.3:634746-636569		1.57685	2.38413	0.410057		3.02434	1.1295	5.04539		7.67533	6.25244	5.85837		1.94786	3.39438	4.83171		5.14043	4.2798	4.4938
	ybdN	U00096.3:634746-636569		0	0.122228	0.284714		0.558604	0.420883	0.409468		0.904864	0.644044	1.79453		4.12254	2.64168	1.17232		1.85157	1.73691	2.59197
	ybdO	U00096.3:636715-637618		0.876622	0.826153	0		0.594335	0.550423	0.324001		0.333513	1.67856	0		0	0	0		1.30485	1.13268	0.123102
	dsbG	U00096.3:637826-638573		8.61955	15.7606	9.27417		12.4141	13.0888	20.2453		18.6341	19.4971	18.7566		27.2954	16.906	14.3481		25.7003	17.2818	13.4411
	ahpC	U00096.3:638944-639508		509.555	556.953	517.218		2255.68	1551.01	2394.71		3835.83	1841.87	1655.62		753.833	806.611	413.758		527.941	318.912	363.515
	ahpF	U00096.3:639752-641318		31.3851	35.3062	35.08		165.193	137.322	148.327		62.9469	26.4805	36.9807		24.5205	21.4402	19.0077		18.0042	18.0631	16.9685
	uspG	U00096.3:641438-641867		20.4798	53.4509	51.5033		26.1767	33.6146	35.3425		71.0689	33.7117	31.9702		21.6156	8.72507	20.6041		16.158	6.13415	6.13669
	ybdR	U00096.3:642087-643326		0	0.972508	0.337509		1.06672	0.687473	0		0	3.16932	4.49364		3.33018	2.65174	3.45216		2.79832	0.692715	2.1134
	rnk	U00096.3:643556-643967		29.7719	24.1063	23.7663		26.7221	17.3982	39.3854		62.682	24.2613	15.6606		14.6089	24.1319	21.0591		29.49	8.01732	26.8419
	rna	U00096.3:644196-645003		23.4984	27.808	17.4926		16.0893	17.9404	16.7133		9.36967	10.5414	10.7808		15.3575	7.81357	8.33611		11.8781	9.98271	5.44966
	citT	U00096.3:645116-646580		0.46158	0.744915	0.123656		0.336306	0.446118	0.827319		1.52912	2.61973	1.26703		3.22896	2.89419	1.792		1.81164	1.25358	1.16582
	citG	U00096.3:646630-648035		0.154321	0	0		0	0	0		0	0.344407	0		0.564533	0.191493	0.48647		0.547693	0.12259	0.314834
	citX	U00096.3:646630-648035		0.347801	0	0		0	0.581917	0		7.07488	0	2.07407		0.705382	3.63059	2.77234		2.20414	1.53043	1.81254
	citF	U00096.3:648038-649571		0.0662355	0.183022	0		0	0.0625971	0		0	0.344531	0.185336		0.688172	0.54805	0.625637		0.336001	0.682959	0.130466
	citD	U00096.3:649581-650783		0	0	0		0	0	0		0	0	0		0	3.10847	0		2.19331	0	0
	citE	U00096.3:649581-650783		0	0	0		0	0.113222	0.299837		0	0.967785	0		0.587887	0.590776	0.162273		0.212705	0.315638	0.127401
	citC	U00096.3:650797-651856		0	0	0		0	0	0		0	0.258544	0		0.235103	0	0.134839		0.518772	0.0836702	0.180274
	citA	U00096.3:652234-654542		0.747187	1.80811	2.04499		2.30682	2.10057	4.18202		0.457261	2.27185	2.50082		1.99514	2.38824	2.78327		2.99584	2.60474	2.09608
	citB	U00096.3:652234-654542		3.71422	4.16034	2.14268		4.29167	7.01881	6.79707		3.46669	6.57652	12.9947		5.0672	7.63503	11.4214		7.22035	3.92042	6.10727
	dcuC	U00096.3:654582-655968		1.01678	1.1442	1.77719		1.02174	0.630513	0.724963		0.602693	1.66733	1.34094		1.53682	0.9293	0.863075		2.17278	1.81784	1.54238
	pagP	U00096.3:656556-657117		0.244801	0	0		0.500464	0	2.01621		0	0	0		1.37206	1.23082	6.47103		1.90459	0.199902	0.247445
	cspE	U00096.3:657291-657501		15405	12071.8	9437.02		11965.3	17950	11490.1		3093.3	5673.9	7848.9		3372.52	1779.65	8210.56		4470.3	10929.4	2633.11
	flc	U00096.3:657554-657938		12.499	20.2821	10.5292		25.1174	14.6025	18.4454		8.79766	8.88057	16.2704		24.3329	10.8283	3.47456		15.6036	5.57093	6.73842
	ybeM	U00096.3:658030-658818		1.16712	4.05574	4.67692		0.351054	4.2813	1.48697		0.907235	2.37489	1.69118		3.58067	3.03879	3.85788		7.08704	8.54379	6.20606
	tatE	U00096.3:658946-659150		278.987	128.095	183.943		331.535	189.757	250.088		236.382	111.503	132.868		199.59	113.841	115.085		135.32	97.0251	172.125
	lipA	U00096.3:659250-660216		53.1735	46.2659	46.0301		60.8677	85.7445	82.2027		55.5317	60.679	38.8504		45.9109	38.4822	19.9905		21.1028	27.6952	17.6335
	ybeF	U00096.3:660424-661378		0.14674	1.19327	0.568274		0.583622	0.490458	0.31513		1.00545	0	0.887862		1.57186	0.97621	3.79861		1.24856	1.97411	1.08959
	lipB	U00096.3:661636-662278		20.4528	20.924	26.4686		31.1408	29.4236	28.8619		33.1778	32.4715	26.3562		74.4104	55.2579	63.4566		41.4023	32.4339	26.7135
	ybeD	U00096.3:662378-662642		319.284	836.06	796.052		601.91	337.992	417.714		654.905	537.021	489.303		1463.74	2016.61	1595.55		1733.98	1030.1	975.054
	dacA	U00096.3:662751-663963		44.803	48.4642	45.4897		53.4949	50.3012	78.0687		125.456	53.1	51.7029		62.1313	59.6825	59.9847		49.9917	41.1122	43.8715
	rlpA	U00096.3:664101-665190		27.8683	28.0982	12.5371		30.0201	31.2844	43.2845		44.0748	24.7815	24.8078		38.0537	30.6365	21.9806		35.5391	24.8336	22.8479
	mrdB	U00096.3:665200-666313		17.2819	13.0357	15.329		24.497	28.9992	30.9062		22.6737	26.3236	22.0993		35.5392	21.8676	21.0153		24.2132	14.9393	15.6094
	mrdA	U00096.3:666315-668217		13.4794	7.19219	7.28945		19.3803	22.6324	23.9538		16.9677	16.629	14.8274		20.4974	19.7508	15.1631		22.1821	16.0464	11.7724
	rlmH	U00096.3:668247-668715		76.2627	46.6038	33.6996		95.4001	78.6912	80.8431		122.835	79.6666	74.2031		102.015	58.0289	52.3738		64.6727	46.8726	36.9075
	rsfS	U00096.3:668718-669036		91.2725	40.5582	57.5825		96.1625	116.945	125.014		157.882	95.8331	94.2682		90.6468	96.7392	63.6797		99.8134	60.9127	54.1296
	cobC	U00096.3:669295-669907		4.54139	3.34359	7.32462		11.0664	8.25741	18.602		24.3442	15.3487	17.206		16.247	13.7137	10.7313		14.9518	11.2675	9.91233
	nadD	U00096.3:669930-670572		8.32625	12.2486	14.5828		15.5278	16.2816	22.901		11.8437	12.9909	8.09515		13.4579	8.36698	6.02992		5.96434	8.31086	9.05631
	holA	U00096.3:670573-672186		17.9823	9.70063	11.47		25.602	22.7865	17.5388		9.06063	16.9865	14.3214		9.08526	7.21408	7.83144		12.2117	10.0709	7.75714
	lptE	U00096.3:670573-672186		60.8624	32.2984	24.1527		46.9999	40.9808	65.6715		17.1956	12.5385	33.6176		9.45161	36.8796	12.9059		23.0848	15.1485	16.109
	leuS	U00096.3:672200-674783		34.8103	29.376	29.2403		41.3375	49.8603	41.404		29.7635	21.8011	23.6545		29.2821	18.1521	13.3318		20.4424	17.8478	12.8572
	ybeL	U00096.3:675017-675500		21.1185	24.5365	25.8505		9.59943	12.8119	11.3898		7.39147	7.21185	4.60046		8.04319	5.94941	6.53221		12.0723	8.00274	7.25923
	ybeQ	U00096.3:675569-676547		0	0.615016	1.12609		0.79587	0.35478	1.01854		3.96486	1.2918	0.436068		0.546584	1.19483	0.416503		1.54742	0.91868	1.91398
	djlB	U00096.3:676710-678842		0.0750619	0.108206	0.719231		0	0.0740695	0.172702		0.185268	0.567106	0		0.485096	0.630329	0.374899		0.770486	1.32306	0.205702
	ybeR	U00096.3:676710-678842		0	0.278394	1.62903		0.349424	0.585475	0.941633		0	1.55654	0		1.77989	0.234179	0.610693		0.327312	1.08849	0.196705
	ybeT	U00096.3:678851-679406		0.987022	0	1.89741		0	1.73929	1.54469		0	0	1.01165		0	0	0.895722		0.464538	2.27158	1.59515
	djlC	U00096.3:679507-681663		0.763403	1.22601	1.05812		0.675125	1.22053	1.08334		4.29733	3.09591	2.08901		3.29968	2.13773	1.38592		2.06578	1.17048	2.00433
	ybeU	U00096.3:679507-681663		0.161836	0.101064	0		0.62878	0.616989	0.957565		6.30865	1.4442	0.439001		1.05254	0.802982	1.71878		0.524359	1.55504	0.190778
	hscC	U00096.3:681722-683393		3.74557	2.8859	2.6744		1.1004	1.60427	1.00654		2.39727	2.02362	2.98717		1.67975	1.5596	1.49101		1.82942	2.37415	1.07252
	rihA	U00096.3:683476-684412		58.5816	106.915	63.7428		28.7144	23.3322	22.2016		28.2212	13.0659	10.6112		10.0124	4.90396	8.09349		24.8094	18.1494	33.8389
	gltJ	U00096.3:684529-686669		2.46425	3.69724	3.64175		2.31895	3.96837	3.8588		1.51358	7.17205	6.99091		7.43464	2.32793	3.86614		5.81285	5.35552	4.41534
	gltK	U00096.3:684529-686669		2.6045	11.143	5.16974		4.96538	8.66793	6.56524		5.59219	13.6639	8.31324		11.3149	5.95451	12.626		13.2495	17.5846	11.6721
	gltL	U00096.3:684529-686669		5.68537	12.2353	7.49771		9.58803	13.1987	8.59035		11.4428	12.624	15.0635		12.139	13.835	8.39774		18.5986	19.8068	13.838
	gltI	U00096.3:686838-687747		13.6669	26.3506	8.28501		9.40654	8.84095	11.1882		13.9688	6.33356	9.49076		9.14917	8.92724	7.61001		23.05	25.817	21.0061
	lnt	U00096.3:689342-690881		7.82611	8.4445	9.38536		17.5695	15.9264	23.073		14.4109	9.66585	12.3293		32.0938	29.1822	26.5051		24.9201	22.1208	21.5216
	ybeX	U00096.3:690905-691784		55.3982	60.8263	49.4949		97.9286	115.004	75.9115		82.9895	70.0086	48.7275		225.864	133.17	156.63		129.82	154.442	110.901
	ybeY	U00096.3:691873-693378		20.9132	37.6948	74.5776		57.9171	37.6976	32.0793		54.6611	20.478	26.5827		135.046	143.379	181.038		136.959	119.199	135.424
	ybeZ	U00096.3:691873-693378		23.6978	49.4789	46.8371		45.3687	45.7414	19.7203		48.2338	29.4316	28.6417		104.689	118.238	95.2642		95.7131	85.9024	93.3022
	miaB	U00096.3:693530-694955		17.1015	11.5249	14.0175		24.5879	21.8861	31.5183		30.3459	16.9414	20.9392		23.7004	26.186	19.1536		16.1143	15.5266	16.6336
	ubiF	U00096.3:695100-696276		8.53678	6.70208	9.38484		7.1542	5.12731	12.233		8.15978	4.47719	8.35236		5.95322	8.11066	5.33333		4.24826	4.35465	5.65537
	glnX	U00096.3:696429-696504		3199030	1188170	1399460		2513080	1923450	2141180		3888190	4843080	4476690		13975300	4739040	5099070		1791360	3263320	4989730
	glnV	U00096.3:696541-696616		4051050	2429810	1864030		3073420	2270040	2630610		4277450	5411750	5267410		14312400	6298030	6125590		2284850	3981820	5537740
	metU	U00096.3:696663-696740		84059	118843	164631		149885	278909	560703		1227520	1040610	514184		804183	273751	431931		894648	141075	364892
	glnW	U00096.3:696755-696830		2726050	1917970	4952080		1892110	1641700	4197500		7154510	3668050	17227900		2961380	4842280	8063760		5542290	2041860	3890840
	glnU	U00096.3:696864-696939		2829630	1943860	2068560		2809820	3896320	5777110		11444100	5686390	13835200		8732370	6169050	12746500		6622980	4544140	5311550
	leuW	U00096.3:696962-697047		400059	448191	404656		222386	204404	818618		1427840	332190	580325		1366470	377802	497930		648675	537424	421510
	metT	U00096.3:697056-697133		45502.4	48927.5	107191		85725.2	175342	267570		900340	746797	313972		758699	141618	212423		615447	94326.2	172008
	asnB	U00096.3:697512-699177		8.16724	14.0446	11.7255		7.84714	7.15163	5.25657		3.97509	3.68471	5.20745		5.83909	5.36775	3.94798		5.86137	6.9222	7.00721
	umpH	U00096.3:699573-700326		26.0555	32.3086	29.8628		29.6731	20.8288	25.7075		44.2058	30.9527	27.8949		42.0301	44.0221	36.1854		41.3109	33.8748	45.8227
	nagC	U00096.3:700373-701594		16.0104	15.4985	16.0677		19.5433	13.5961	18.0077		13.0747	13.487	14.1931		16.6224	11.9495	12.6561		17.721	18.1716	16.2311
	nagA	U00096.3:701602-702751		16.6644	25.0238	15.7413		14.3616	10.8219	14.3875		14.8883	6.58444	8.68966		17.489	13.5813	12.6049		18.7012	19.191	13.0416
	nagB	U00096.3:702810-703611		15.6202	17.1385	17.204		8.66181	8.68681	9.8071		3.68908	3.08319	7.10657		5.93293	5.77817	8.56238		17.0387	9.31174	10.5863
	nagE	U00096.3:703943-705890		25.7482	40.8945	23.6093		21.9102	17.1655	16.7819		13.5078	11.922	9.12857		14.0282	7.60596	12.5588		14.8573	23.053	19.9047
	glnS	U00096.3:706092-707757		81.601	74.4328	56.263		97.2668	108.321	89.7437		89.0123	66.4427	71.5944		79.6541	62.7645	59.8699		53.8527	64.0612	39.1415
	chiP	U00096.3:708333-709740		5.03187	2.42509	1.80428		0.723824	0.16762	0		1.18142	0.619436	0.885736		0.553878	0.325662	1.19155		2.81827	3.69736	4.14034
	chiQ	U00096.3:709789-710116		0.862504	0.562155	0		3.16464	1.49304	2.09892		5.51673	4.25417	0		3.25748	0.966038	0		4.53681	1.52938	2.00941
	fur	U00096.3:710199-710725		247.486	139.416	117.401		166.125	233.595	240.797		173.233	111.674	113.394		156.383	165.732	88.2901		183.211	87.2965	88.0444
	uof	U00096.3:710199-710725		6972.58	6770.35	2393.57		5097.53	2540.44	4854.52		2354.78	1654.7	2772.69		5419.75	2111.86	2566.71		3173.02	1678.26	1371.56
	fldA	U00096.3:710934-711465		45.84	41.1969	29.9903		49.8389	46.4643	64.4416		33.8449	45.2802	43.815		42.7947	43.2426	27.6239		28.8499	21.4445	26.4333
	ybfE	U00096.3:711604-711898		14.7331	4.40451	5.91655		4.08321	6.59335	24.7922		10.8791	8.61566	6.03338		17.9442	18.3537	1.20661		9.75468	5.45998	9.96291
	ybfF	U00096.3:712037-712802		10.7905	13.3393	15.0235		9.30802	12.1921	11.5539		5.60477	2.82255	5.93706		7.07768	8.22124	3.21549		8.03435	6.03593	5.68009
	seqA	U00096.3:712986-713532		35.6888	34.3388	46.42		35.3545	30.5642	55.1794		31.1132	21.8517	37.0234		25.1693	28.8175	24.4084		22.5915	19.8715	18.189
	pgm	U00096.3:713557-715198		52.5801	69.3873	48.3866		62.0095	61.9095	41.6277		33.6691	33.4258	41.2335		27.0278	31.1668	21.0404		24.8662	31.3199	23.647
	ybfP	U00096.3:715411-715906		0.910729	1.14684	0		2.76952	1.14133	0.580765		1.50564	1.49962	0		0	0.323271	1.74114		1.92562	0.856252	1.15357
	ybfG	U00096.3:715946-716597		1.50042	1.28914	1.0992		53.9516	131.807	275.399		1474.24	1923.78	1664.36		1564.74	904.905	1146.99		1063.85	568.464	514.371
	ybfI	U00096.3:716720-716870		0	0	0		0	0	24.2224		0	56.8237	0		0	20.1174	0		28.0598	16.5177	8.46104
	potE	U00096.3:716945-720460		0.751071	1.37368	1.02494		0.569076	2.09696	0.635982		2.21056	0.721694	5.12156		5.23429	3.09051	4.07973		3.85474	4.65251	2.41064
	speF	U00096.3:716945-720460		0.127431	0.188183	0.290164		0.194616	0.356278	0.514385		1.36353	0.81778	0.469375		1.3887	0.48237	0.426798		1.06069	1.05334	0.644927
	ybfK	U00096.3:720582-720840		0	1.01531	0		0	0	0		0	0	0		0	0	0		2.08321	0	0
	kdpC	U00096.3:721055-724979		3.13152	1.44449	1.80418		0.529068	0.973058	1.22404		7.53343	3.41859	2.85373		9.10072	14.3657	12.3449		19.7951	17.0508	15.5437
	kdpD	U00096.3:721055-724979		1.71855	2.18463	1.5468		2.26969	3.72031	4.81763		29.8421	13.1085	14.425		20.2763	19.4181	16.1559		25.2532	19.6456	24.7942
	kdpE	U00096.3:721055-724979		1.47988	2.76842	2.52775		0.932667	4.2486	6.5653		30.6733	11.4776	13.6904		16.969	14.6588	12.6		25.1443	17.7672	19.1596
	kdpB	U00096.3:724987-727036		0.817187	1.59295	0.513652		0.852249	0.763007	2.39927		2.26015	1.59638	2.41678		12.9973	11.8313	7.45524		25.8389	16.0926	8.04946
	kdpA	U00096.3:727058-728821		0.776835	0.44545	0.451183		0.956114	0.624365	0.930407		1.60425	0.703103	2.27065		10.9623	10.3057	9.48443		16.3374	10.0387	6.68975
	kdpF	U00096.3:727058-728821		0	0	0		0	0	0		427.196	0	0		0	121.977	136.015		84.2048	116.151	61.0464
	ybfA	U00096.3:729133-729340		68.3793	133.727	54.6325		111.995	132.31	71.853		63.9924	60.4538	21.3207		59.0893	20.0446	13.8527		31.5188	26.0325	16.7062
	rhsC	U00096.3:729582-734102		0.687617	0.890231	1.01733		0.862012	0.792479	1.48062		7.47673	2.33568	3.72581		4.65709	4.93108	2.89684		6.40148	3.74285	6.06855
	ybfB	U00096.3:729582-734102		4.31035	2.38472	0		0	0	0		0	3.75551	0		1.92672	0	8.54392		0.783828	0.571877	0
	rhsO	U00096.3:734132-736219		0.829316	0.866779	1.06163		0.845104	0.769233	0.746856		5.00862	0.888858	3.72011		3.86601	5.85352	2.12364		8.51573	4.60495	7.24013
	ybfC	U00096.3:734132-736219		0.297062	2.5243	3.07968		0	0.937785	0.640311		0.624276	0.662719	1.91587		0.541349	0	0.444812		1.94422	0.889706	1.5032
	ybfQ	U00096.3:736444-736684		0	1.79869	0		0	4.32273	0		0	2.87233	9.41271		0	0	16.9601		14.1216	3.0882	3.72504
	ybfL	U00096.3:736824-737961		0.234178	0.714771	0.588469		1.54274	0.373915	1.06173		0	0.421127	0		1.22125	1.32486	0.346498		1.67755	0.857533	0.679605
	ybfD	U00096.3:738091-738853		0	0.133752	0		0.382491	1.54541	0		0	0	0.620953		0.850664	0.211026	1.74482		1.3646	1.2248	0.644095
	phr	U00096.3:739000-740925		1.52518	1.06101	1.65034		1.93211	1.59201	3.39209		1.59148	1.24575	1.06697		2.45766	1.5288	1.52623		2.36942	2.76506	2.23499
	ybgA	U00096.3:739000-740925		1.65549	2.51008	4.07491		2.39421	5.25618	2.69875		5.73912	1.49549	3.09763		1.64094	1.80326	1.81979		2.75486	1.69657	1.21102
	dtpD	U00096.3:741074-742556		0.662091	0.405676	1.666		1.35073	0.738845	1.68819		0.91076	0.483127	0.360655		0.757692	0.55686	0.393409		0.8159	0.542036	0.816073
	ybgI	U00096.3:742826-743570		4.56869	9.57457	10.6099		6.56125	7.19334	7.74161		4.67208	3.28823	3.7353		6.77402	3.82233	5.82784		5.63921	5.53992	8.90492
	ybgJ	U00096.3:743592-745899		18.1919	24.4114	27.6004		29.2773	12.7592	14.1039		13.7769	10.2791	27.5209		16.9469	17.0728	17.4482		18.9287	14.44	16.8627
	ybgK	U00096.3:743592-745899		8.65576	12.3859	22.2095		23.4519	14.304	14.4861		13.796	10.2101	15.8519		15.2273	18.6433	10.7504		15.1646	13.6692	14.2851
	ybgL	U00096.3:743592-745899		5.32318	7.17192	7.88027		6.1186	7.29257	7.49681		5.99274	2.8376	8.0513		4.98369	8.27083	7.81838		9.05308	7.30334	7.01009
	abrB	U00096.3:745934-747769		1.02875	2.3616	1.80342		0.375582	0.813123	1.17445		1.44499	0.812537	0.795568		0.798958	0.448118	0.66789		1.22791	0.472922	0.61804
	nei	U00096.3:745934-747769		2.17035	4.78837	5.93499		14.3699	5.78583	7.2552		9.12696	7.60143	2.50164		11.7618	5.9406	8.3905		5.54017	10.1588	6.20928
	ybgO	U00096.3:747920-749707		0.348334	0.501674	0.145433		0	1.50203	0.494389		0.899537	0.487357	0.325243		2.4835	0.124789	0		1.28974	0.437343	0.486925
	ybgP	U00096.3:747920-749707		0.267176	1.00411	0		0	1.43497	1.1785		1.07992	1.19667	0.803356		0.934754	2.37271	1.543		1.2424	2.0777	1.91638
	ybgQ	U00096.3:749721-752169		0	0.0336303	0		0.191218	0.0791576	0.223104		1.22994	0.480746	0.148532		0.32261	0.850678	0.850154		0.541848	0.260522	0.4099
	ybgD	U00096.3:752228-752795		0	0	0		0.402953	0.128562	0		1.20436	0	5.33458		0.130301	0.840329	0		1.3896	0.810116	0.764848
	gltA	U00096.3:753184-754468		70.7382	316.159	206.92		92.8559	55.8489	43.0869		42.1528	37.1967	32.3062		74.9984	54.8549	69.5816		186.679	195.776	145.845
	sdhA	U00096.3:755176-757673		131.233	196.307	104.819		64.6309	53.2969	36.5404		30.4531	31.0259	41.1755		67.8244	75.4155	72.3682		148.302	186.602	167.797
	sdhC	U00096.3:755176-757673		362.903	475.548	204.401		107.759	135.153	66.075		47.6621	118.127	150.977		140.862	112.941	211.863		407.347	500.278	240.756
	sdhD	U00096.3:755176-757673		328.041	351.529	250.355		88.1294	72.1004	98.7767		134.805	78.5104	109.115		197.011	125.382	216.766		627.919	336.475	432.557
	sdhB	U00096.3:757688-758405		133.554	250.748	168.268		100.642	74.6264	62.8992		20.7244	41.1607	66.0267		67.6302	98.1196	87.7121		219.184	233.952	197.994
	sucA	U00096.3:758705-761507		69.1292	169.692	107.989		137.891	86.0014	64.2218		82.7154	58.3931	56.1353		94.7265	69.2612	71.3368		151.351	187.437	210.227
	sucB	U00096.3:761521-762739		69.0006	92.6443	73.9168		153.692	124.294	95.614		179.084	78.5858	44.0672		86.7583	75.2607	59.2275		81.807	126.147	163.282
	sucC	U00096.3:763013-765049		63.2371	119.631	131.407		178.911	125.222	97.2769		149.853	63.0194	88.2354		95.8203	137.889	86.2417		140.596	148.493	226.195
	sucD	U00096.3:763013-765049		105.336	300.712	205.49		391.214	416.339	193.973		204.484	161.383	199.253		274.387	164.722	196.158		191.93	340.068	271.112
	mngR	U00096.3:765152-765875		6.61146	8.82096	9.61359		5.69019	6.2579	6.8807		2.34228	5.89994	6.07986		3.98406	1.39164	4.90369		4.25475	3.7735	2.28016
	mngA	U00096.3:765983-767960		0.061782	0.12318	0.294363		0	0.218973	0		1.18045	0.591914	0.193511		0.862327	0.28646	0.982757		1.11768	1.20113	0.52257
	mngB	U00096.3:767977-770611		0.700499	1.28879	1.0894		0.790047	1.21761	1.19747		2.80961	2.3748	3.83867		2.63397	2.27533	1.98761		4.13079	3.2201	2.75913
	cydA	U00096.3:771457-773026		57.5309	39.2002	38.3995		84.6851	87.4471	108.252		107.438	47.8488	62.8169		27.9627	16.7229	13.7862		12.6808	9.96161	11.7482
	cydB	U00096.3:773041-774181		99.67	73.6895	52.0694		163.03	208.793	182.275		160.054	146.279	112.863		67.3389	35.4689	25.8708		21.9616	21.2481	14.0452
	cydX	U00096.3:774195-774602		370.309	438.937	809.526		911.34	718.337	864.388		1003.25	959.022	2147.89		760.525	963.505	446.709		646.194	197.712	350.974
	ybgE	U00096.3:774195-774602		41.6571	50.4558	46.4958		53.7608	105.177	198.269		106.487	110.349	196.349		129.165	76.0582	99.0205		77.2366	68.6371	71.8762
	tolQ	U00096.3:774751-775845		12.1724	11.8387	11.0017		31.7515	35.3724	52.8494		160.252	67.8561	76.025		117.555	162.205	86.1142		156.481	87.8102	224.647
	ybgC	U00096.3:774751-775845		38.9854	44.4769	21.4282		43.6218	25.045	41.5296		29.7514	34.4418	10.843		22.1969	28.5798	32.7904		29.8204	14.0474	14.8738
	tolR	U00096.3:775848-776277		15.4456	17.7973	15.7993		39.6198	76.3227	64.6199		150.89	211.642	211.12		213.836	154.94	236.284		191.86	315.719	135.306
	tolA	U00096.3:776341-777607		33.878	26.21	18.0546		57.1473	83.2255	91.105		188.438	311.248	334.378		311.742	219.661	261.655		255.769	220.567	166.624
	tolB	U00096.3:777739-779032		114.179	106.242	124.518		161.851	236.619	230.545		552.518	583.346	983.164		822.677	666.723	827.497		713.52	587.232	455.352
	pal	U00096.3:779066-779588		297.133	448.294	342.862		311.104	350.59	388.187		1038.39	671.433	1219.57		916.984	1060.41	1020.63		1183.86	706.421	760.999
	ybgF (copB)	U00096.3:779597-780389		123.856	145.281	180.423		138.745	187.859	188.326		363.828	303.511	629.687		538.653	522.159	686.066		518.125	422.364	365.68
	lysT	U00096.3:780553-780629		279611	255040	1135970		290534	635860	1196010		2394710	1814600	1613060		2793030	1419630	3117000		1468170	633164	1876250
	valT	U00096.3:780764-780840		363151	193699	348834		499198	379452	523236		1764810	1098480	783624		773106	1796260	1204000		467942	267710	1953570
	lysW	U00096.3:780842-780918		189332	170342	897837		215025	453485	973804		2343290	1482300	1298340		2184850	1180610	2477600		1159460	517596	1510990
	valZ	U00096.3:781067-781143		314152	161920	278693		452229	326183	473233		1916030	1010750	670216		726077	1578090	989129		402980	264606	1907510
	lysY	U00096.3:781146-781222		190580	171536	915378		218171	466004	990780		2242290	1430200	1338280		1850340	1248460	2565560		1193820	524990	1669710
	lysZ	U00096.3:781368-781444		231670	252119	989532		266840	374293	1534620		3605190	1377620	1443620		1670670	914511	1365470		1631380	338955	1784120
	lysQ	U00096.3:781576-781652		278500	259020	865013		255665	372293	1169860		2997080	1606930	1061880		1645150	608353	1101470		1088690	296461	857153
	nadA	U00096.3:782084-783128		1.55573	5.87509	2.31574		2.29114	2.01293	2.62413		6.51594	4.00335	2.52152		8.25108	6.01613	4.17413		8.62906	3.69536	2.8494
	pnuC	U00096.3:783165-784823		2.45474	9.2448	10.806		6.77359	7.61534	4.63061		4.13671	6.19072	5.84155		4.92072	2.71468	4.84754		9.31398	3.02095	3.43975
	zitB	U00096.3:783165-784823		3.22208	2.51884	2.69834		1.94612	1.56781	1.35437		0.838434	2.06664	1.13496		1.25202	0.570094	1.07393		2.11222	1.52484	2.47613
	ybgS	U00096.3:784936-785317		0.908805	1.0074	3.03462		0.871341	1.90923	4.00698		0	1.23116	2.45181		0	5.50013	0		8.34991	1.12354	6.01679
	aroG	U00096.3:785632-786685		19.2091	24.0475	28.7256		27.9537	16.1052	19.2011		16.636	8.62176	11.9454		15.2129	18.6087	14.5753		26.6467	24.0903	28.3463
	gpmA	U00096.3:786842-787595		79.2286	62.8506	54.0929		116.193	100.582	151.995		90.1772	81.1187	52.275		37.612	37.3326	21.6324		20.319	38.0773	30.4753
	galK	U00096.3:787796-789979		9.84285	26.9145	28.1654		16.4585	11.4041	10.1582		18.3169	9.48064	10.1457		9.70479	10.2019	10.5651		7.49518	6.75479	14.8568
	galM	U00096.3:787796-789979		50.0231	62.5105	75.4737		83.0314	55.7607	55.9454		51.3612	18.4348	32.371		14.0598	20.3973	15.1936		19.9764	19.7078	18.9956
	galT	U00096.3:789982-791029		11.572	23.6775	12.0983		8.18	12.5952	9.43637		11.7219	5.86662	4.55906		6.075	7.0823	3.87759		10.0751	9.36217	10.3444
	galE	U00096.3:791038-792055		17.5074	25.8183	11.1962		8.22114	9.68569	7.89834		9.16541	7.44064	7.46425		4.27948	4.91275	4.01506		7.55532	8.44783	6.87586
	modF	U00096.3:792315-793788		4.38024	8.21927	5.01114		5.42759	3.03941	3.40182		1.90551	2.87315	2.39028		3.06612	2.25977	2.8699		3.61822	2.43457	3.99147
	modE	U00096.3:793855-794644		6.15095	13.2243	8.93478		10.7756	12.8089	16.0056		11.5003	8.3379	14.7352		6.17666	12.7865	7.57468		8.86758	8.08621	9.46285
	acrZ	U00096.3:794772-794922		629.189	393.578	455.111		367.791	540.172	492.506		606.825	320.967	330.479		213.987	123.719	256.84		335.398	79.0783	111.031
	modA	U00096.3:795088-796551		11.2397	12.6729	14.1922		8.69773	8.42222	13.3271		10.2214	10.0011	11.4661		14.3089	11.4812	12.255		17.0103	13.6916	10.2833
	modB	U00096.3:795088-796551		2.95817	3.41344	2.97315		4.95082	3.83866	5.13433		6.6143	6.58055	5.69708		8.93827	6.94696	5.17275		6.42132	4.29127	4.86676
	modC	U00096.3:796553-797612		7.38743	4.94448	8.38302		3.39343	5.06858	7.14704		11.0012	12.1637	14.8988		18.8008	14.4275	12.3359		18.6547	12.1594	12.4935
	ybhA	U00096.3:797612-798431		5.87309	7.15151	6.65653		5.35603	6.6169	9.13661		16.6682	13.7247	12.9885		11.7196	9.1117	9.85882		10.9886	5.60351	9.12212
	pgl	U00096.3:798585-799581		15.6533	26.7882	36.9918		29.3529	28.1349	34.9657		32.4916	19.6579	32.0755		23.3087	24.9602	23.2819		13.9185	14.1407	20.0519
	ybhD	U00096.3:799621-800575		0	0	0.575292		0	0.168219	0.498057		0	0	0		0.430368	0.375363	0		1.08463	0.163523	0
	ybhH	U00096.3:800758-801811		0.134008	0	0.907122		0	0.119937	0		0.892202	0	0		0	0	0.740058		0	0	0.333616
	ybhI	U00096.3:801886-803320		0.0851205	0.299906	0		0.326761	0.137719	0		2.00265	0.156268	0.470144		1.64821	0.511669	1.12168		1.14772	0.720528	0.738742
	ybhJ	U00096.3:803502-805764		0.316265	0.336433	0.847195		0.985782	1.47134	1.19746		15.2362	9.74126	11.2932		37.26	34.3443	27.2277		48.4159	36.7111	38.7182
	ybhC	U00096.3:805997-807281		6.78918	4.39305	5.02177		8.82558	5.59421	9.24823		7.50966	4.58701	5.83421		5.1209	4.39483	4.27784		6.1316	5.71636	3.47929
	ybhB	U00096.3:807432-807909		0	1.56694	0.591314		0.713147	0.325781	3.79988		0	3.08282	0		3.59936	1.91649	0.515437		1.75941	0.305659	1.1119
	bioA	U00096.3:807967-809257		0.211917	0.626432	0.315039		0	1.01388	0.497007		1.40089	0.815681	3.0283		2.78933	3.43559	1.78293		2.9682	1.94409	2.11904
	bioB	U00096.3:809343-812947		0.717327	0.52338	1.00891		0.857939	0.816731	1.72777		7.35513	4.6097	6.64617		5.05869	6.165	7.71796		7.1577	6.0946	6.55457
	bioC	U00096.3:809343-812947		0.480469	0.878004	0.173307		0.920222	1.14287	0.538153		10.8305	4.92674	6.00357		8.21287	10.4275	9.49229		13.2669	12.0561	6.49855
	bioD	U00096.3:809343-812947		1.07531	1.17684	1.19712		1.00735	1.20316	2.9334		12.586	3.50382	5.21109		11.3591	10.0441	12.3413		14.8743	7.0454	11.325
	bioF	U00096.3:809343-812947		0.401753	1.09604	2.67787		1.35695	1.60979	2.81311		7.47493	4.6871	8.69619		9.67547	10.7141	11.0351		9.24792	8.36758	7.21011
	uvrB	U00096.3:813525-815547		6.05533	5.85758	4.49813		7.98121	6.94836	6.68094		8.26955	11.1389	9.49502		17.1543	10.8514	10.5247		11.3686	11.4402	7.30478
	ybhK	U00096.3:815738-816647		3.89447	6.94654	5.73517		5.14315	4.84902	6.66092		4.37288	2.27623	4.76262		6.59417	4.90765	3.99472		4.00627	4.09425	4.19955
	moaA	U00096.3:817043-818033		11.3835	18.6117	12.1679		16.0939	13.3174	17.5677		15.927	8.88164	8.78188		9.89249	8.88853	8.72895		10.7997	8.86465	7.05464
	moaB	U00096.3:818054-818567		24.7758	32.9699	39.7424		25.8026	25.3006	35.2083		21.8443	27.0224	25.7629		32.3223	21.5725	17.7887		27.4523	14.3258	24.8391
	moaC	U00096.3:818569-819293		58.4882	43.7181	32.8496		61.1522	80.3624	45.9274		67.2319	66.6535	34.1843		54.0208	29.4996	27.2216		38.3053	40.2932	25.879
	moaD	U00096.3:818569-819293		74.6126	48.0184	70.1492		100.785	89.8296	21.1709		47.6016	49.1596	113.902		12.372	5.30554	50.2317		29.4059	53.1382	23.6545
	moaE	U00096.3:819294-819747		25.9637	26.5739	31.4977		26.1955	12.8069	38.2662		40.8805	32.2336	41.1991		36.8089	32.8333	23.6857		20.636	10.1265	27.186
	ybhL	U00096.3:819883-820588		24.6007	22.0118	20.9375		22.7508	22.5683	26.3968		19.0371	23.9509	19.9357		25.2535	16.3622	12.7811		12.4489	12.6315	9.54838
	ybhM	U00096.3:820792-821506		1.06402	1.27485	0.431433		2.44825	1.30647	0		1.2125	0	0		1.67678	1.92054	2.0993		2.40905	1.91755	0
	clsB	U00096.3:821541-824497		0	0.548676	0.391704		0.680291	0.100044	0.506753		0.530658	1.23779	1.93007		0.567935	0.263726	0.170109		1.14157	0.582962	1.1996
	ybhN	U00096.3:821541-824497		0.756101	0	0.265988		0.31641	0.464931	0.698976		0	2.07729	2.03845		1.26897	1.18152	1.23862		0.484839	0.977413	0.91965
	ybhP	U00096.3:821541-824497		0.200145	0.147091	1.95565		0.433436	0	0.52531		0.546653	0	0		0	0.259957	0		0	0.378406	0.409918
	ybhQ	U00096.3:824629-826108		18.9884	9.34554	7.88265		74.6964	68.6326	144.828		409.214	224.135	356.326		260.465	373.988	327.626		921.346	496.77	828.673
	ybhR	U00096.3:824629-826108		1.99313	6.53008	4.30283		4.75544	3.59378	3.79402		2.17435	0.523427	1.8039		0.52129	0.762505	0.149767		1.45869	0.0931612	1.0776
	ybhF	U00096.3:826118-830643		2.86991	4.62636	6.13735		2.86486	2.45905	2.28336		3.75588	0.919902	0.679411		2.63522	1.62064	1.23429		1.70535	1.91156	2.43986
	ybhG	U00096.3:826118-830643		9.55205	12.3013	6.75113		4.81355	3.91049	5.90811		6.13365	1.07279	3.32195		2.34328	1.34928	1.00237		1.60447	3.05795	5.79033
	ybhS	U00096.3:826118-830643		1.66645	3.72852	7.47089		3.63398	2.56814	1.59487		1.65507	0.917468	1.92502		1.02617	0.405139	0.663626		0.95887	1.39369	1.70391
	ybiH	U00096.3:826118-830643		9.36225	27.2355	16.4466		5.88851	3.641	4.46045		4.73861	4.27406	2.08205		4.99957	3.38041	2.35642		4.55921	5.03303	5.35071
	rhlE	U00096.3:830871-832236		2.78209	2.10144	5.49086		6.51721	7.47252	13.1281		8.56975	5.39356	6.04788		6.33301	7.35346	3.86915		5.98312	2.2413	3.20257
	ybiA	U00096.3:832467-832950		0.821474	1.86229	4.56962		0.862466	0.807036	2.29851		1.14129	2.33374	0		0	1.53726	1.35473		3.16652	1.24624	5.85934
	dinG	U00096.3:833069-835220		3.77578	4.3373	4.07224		3.40588	3.76349	5.11805		5.40638	3.63113	4.42786		5.50916	3.59002	4.27696		5.50029	4.81975	4.44319
	ybiB	U00096.3:835247-836210		7.71319	10.3523	9.0099		7.1437	5.87571	9.36659		5.6581	6.54325	7.43225		4.7984	9.44944	7.04751		9.26353	6.56557	9.67155
	ybiC	U00096.3:836350-837436		7.76841	12.6115	12.2057		9.82696	12.5313	13.7948		50.7988	17.1243	13.3878		19.2884	14.066	8.30234		19.3962	13.9251	17.1078
	ybiJ	U00096.3:837664-837925		2.99298	4.16194	0		9.49681	15.9457	14.6825		0	3.34711	12.7214		0	15.5464	11.0764		10.813	2.19277	5.55188
	ybiI	U00096.3:838189-838456		8.16649	0	0		0	2.0676	5.14341		0	0	21.6308		3.69673	5.03191	0		0	1.84763	2.22583
	ybiX	U00096.3:838529-839207		1.04336	1.65983	0		1.60503	0.705317	1.33981		2.46258	2.0776	3.47004		2.65734	2.26865	1.80817		1.66079	1.83038	2.4295
	fiu	U00096.3:839248-841531		6.25739	3.41515	3.15523		1.15952	1.2283	1.41489		2.09698	1.22706	1.42026		2.08249	0.34879	1.63795		1.53119	1.26004	1.4057
	mcbA	U00096.3:841795-842056		0	4.64916	2.48331		0	0	0		0	4.15118	0		0	4.09251	0		5.14146	1.31715	0
	rlmF	U00096.3:842331-845480		6.86176	1.59041	2.29396		5.3154	9.58255	16.8761		22.4217	8.39605	6.92102		8.15722	15.6379	7.15385		8.64553	9.92644	11.5878
	ybiO	U00096.3:842331-845480		0.563631	0.357347	0.492722		0.561657	0.458232	0.374699		0.340811	0.337967	1.1887		1.63309	0.99195	0.702237		1.74325	0.817127	0.79886
	glnP	U00096.3:845740-847119		6.27848	24.2091	13.2202		7.64735	10.8927	12.6888		5.89729	7.99121	8.16257		7.74971	8.28775	6.54282		14.4144	11.3227	11.4015
	glnQ	U00096.3:845740-847119		10.9318	22.8075	20.1979		14.0536	15.003	11.3894		4.2907	9.78425	6.77012		16.4227	14.4586	9.94649		15.2801	17.6383	13.1332
	glnH	U00096.3:847257-848004		22.3607	38.0303	28.3887		25.1162	17.7993	22.0447		17.6758	10.5076	8.67079		14.2057	17.0288	7.71622		19.5156	18.6272	24.1336
	dps	U00096.3:848407-848911		17.2851	41.3547	49.6829		201.697	199.94	336.466		242.653	83.9847	97.4532		28.0697	20.6175	22.122		17.3451	13.4886	13.9659
	rhtA	U00096.3:849209-850097		2.26111	1.14577	1.26637		2.20082	2.37989	4.47098		3.85816	4.71643	4.47357		8.57967	3.91792	4.70424		5.16794	3.65182	1.676
	ompX	U00096.3:850449-850965		425.502	361.137	411.157		378.056	474.352	554.477		103.068	75.4469	123.678		52.5101	41.4593	57.7331		42.0914	40.1726	30.7244
	ybiP	U00096.3:851013-852597		2.2832	1.83767	2.2327		1.65171	4.58775	4.64917		3.5023	3.68706	3.23273		7.09844	4.48085	3.0247		7.04817	4.84876	2.91371
	mntS	U00096.3:852868-852997		103.955	492.407	164.148		40.1425	97.9596	192.915		0	73.5665	51.7742		32.4347	15.8739	54.9672		136.827	47.4202	64.8861
	mntR	U00096.3:853182-854765		24.2246	16.9487	18.4029		10.7679	13.9941	30.7032		11.7028	10.0594	20.8315		15.9333	30.157	19.0706		18.1001	12.5371	16.4654
	ybiR	U00096.3:853182-854765		1.84453	1.98025	3.07584		2.69328	2.38381	3.74962		6.45216	1.00427	3.47995		3.0592	3.1089	3.48243		4.67638	1.79221	2.9048
	ldtB	U00096.3:854823-855744		13.2633	16.448	19.6955		32.6562	37.6295	46.6287		92.2529	61.9053	59.865		69.1472	59.1551	47.983		47.7421	38.6944	41.8434
	ybiT	U00096.3:855962-857555		30.5322	18.7393	21.7133		33.3127	46.6771	52.7018		65.3255	39.5484	45.8169		66.2192	39.3952	32.3411		47.6953	30.7059	30.1577
	ybiU	U00096.3:857795-859061		1.91164	3.79589	3.89157		1.75626	2.69795	3.19878		2.36189	3.8274	4.3865		5.52579	2.55504	4.75829		3.02125	2.48528	1.89625
	ybiV	U00096.3:859212-860028		5.58386	6.50464	7.97566		7.5328	6.42581	10.7182		5.71037	4.1491	8.20827		6.6878	5.94501	7.65038		5.67003	3.4468	2.46447
	ybiW	U00096.3:860173-862606		0.262221	0.166009	0.0581323		0.085989	0.23546	0.378006		0.329269	0.415447	0.254942		0.374679	0.717876	0.365044		0.34504	0.552619	0.991683
	ybiY	U00096.3:862611-863511		0	0.463136	0.415598		0.307145	0	0		0	1.55512	0		0.683985	0.613688	0.181646		0.706555	0.50124	0.234642
	fsaA	U00096.3:863641-864304		2.27016	4.20857	2.55493		2.10721	2.19526	1.76239		6.72633	2.14162	1.72519		1.06088	1.21672	2.4281		2.68536	1.2826	0.658216
	moeA	U00096.3:864379-866364		4.76838	5.62611	5.69474		4.68492	3.73096	5.89937		7.77405	4.35993	4.46629		4.89024	6.15574	5.17794		7.34419	3.81972	5.74425
	moeB	U00096.3:864379-866364		10.7211	7.29784	4.93354		8.23324	7.45604	8.77426		5.80286	5.04082	5.76702		4.43034	2.40306	6.40693		3.80601	4.9433	1.59353
	gsiA	U00096.3:866567-869391		3.37365	5.97464	6.90851		5.92664	6.03152	3.49399		3.13407	2.96659	2.45746		3.26616	2.32063	1.72251		2.91407	4.08735	2.88485
	iaaA	U00096.3:866567-869391		3.06644	10.9898	8.75382		2.67597	2.08066	2.94682		3.50576	0.448756	3.43923		1.84479	1.73549	5.35184		1.76506	2.31545	4.2366
	gsiB	U00096.3:869410-870949		0.931519	5.4519	4.17303		2.21803	2.35832	2.03711		0.19094	1.5149	0.248986		2.2004	1.39492	1.32017		2.41311	2.11531	1.5442
	gsiC	U00096.3:870966-871887		1.07826	2.0783	2.80373		3.65766	3.11417	2.01952		0	1.16496	1.50759		0.639355	2.54803	1.0578		0.241306	2.25005	1.78633
	gsiD	U00096.3:871889-872801		0.804192	1.10279	2.93858		3.51134	2.0978	3.2564		0.732069	0.652765	0		1.8752	0.866046	0.508618		1.73542	0.511417	0.975884
	yliE	U00096.3:872978-875327		2.04428	1.51161	2.42016		3.44965	4.07712	3.41458		1.28298	1.88106	2.16072		3.59074	2.19611	2.32952		3.51096	3.06481	1.66104
	yliF	U00096.3:875334-876663		3.26903	1.72767	1.35952		2.878	2.79332	2.64487		0.729898	0.960177	1.29381		1.71085	1.30019	2.67148		2.57914	2.68197	1.27782
	rimO	U00096.3:876709-878035		15.8762	6.50567	7.08765		15.8543	22.6193	29.6406		26.5684	24.2731	30.3488		23.7191	29.087	17.8746		24.3615	16.9275	13.4078
	bssR	U00096.3:878247-878631		0.381078	19.2895	14.3612		0.631266	1.33896	1.86113		10.5894	3.34317	2.81923		3.8951	4.02512	2.09519		5.45398	4.36865	2.10486
	gstB	U00096.3:878741-880480		6.70823	8.32829	13.0574		8.43988	2.86033	13.655		7.18025	3.47424	7.63232		5.18666	5.08815	3.08566		6.79168	1.51843	7.5112
	yliI	U00096.3:878741-880480		0.372988	0.305332	0.742896		0.746122	0.651385	0.800462		3.34069	0.80698	2.81193		1.87128	1.59612	3.48893		2.02935	1.65653	1.45183
	dacC	U00096.3:880726-881929		9.72161	20.7007	32.5395		17.9762	15.2951	17.3547		9.00789	6.86435	13.1927		11.371	9.76774	7.9513		14.6914	12.3534	7.73004
	deoR	U00096.3:881975-882734		2.42018	4.8062	6.01204		4.49166	4.18623	5.88242		5.57912	4.84572	3.81001		4.39384	5.63732	6.55905		3.39248	2.86725	2.80851
	ybjG	U00096.3:882791-883388		15.0056	15.4991	24.2887		24.1962	26.0055	31.5549		30.0656	20.7758	27.3144		24.1697	16.6625	17.117		16.4852	12.1849	9.51168
	mdfA	U00096.3:883672-884905		3.72419	3.14761	4.1081		6.235	5.59548	9.86802		4.1373	6.80023	7.54347		7.11087	6.58129	4.25868		4.68167	3.32708	3.80013
	ybjH	U00096.3:884945-885230		6.59361	13.8202	0		6.7743	3.67191	10.1619		3.3898	9.61651	5.86853		19.0373	26.9062	13.647		18.8636	20.0321	6.99627
	ybjI	U00096.3:885315-887339		6.97309	17.0931	10.7832		7.89183	11.2748	10.39		12.8379	10.8113	17.0062		11.6648	7.44007	10.5489		12.5868	10.134	12.7529
	ybjJ	U00096.3:885315-887339		3.68724	2.07637	2.33037		2.38234	2.01036	3.94073		8.15335	3.20435	3.4236		3.72834	5.91364	4.74144		5.00452	3.48266	5.98335
	rcdA	U00096.3:887422-887959		5.55736	2.52862	0.853282		3.4436	1.9918	3.80231		1.87237	9.88192	2.74744		8.93288	2.73888	7.0339		12.2139	5.81385	9.68526
	rybB	U00096.3:887975-888054		0	92.6381	1401.09		941.287	759.999	3079.86		7293.56	4181.74	16216.8		5870.86	28329.6	27456.2		7364.7	8076.12	27459.9
	ybjL	U00096.3:888133-889819		6.56936	8.19943	9.16639		10.302	10.3852	11.3929		8.62465	15.4992	11.1284		12.4839	7.40834	8.49381		12.4549	7.67899	5.66387
	ybjM	U00096.3:890088-890466		0.521048	2.79045	9.12126		0	1.03325	3.04071		1.31994	0	1.64942		3.99807	1.88589	0.789233		2.87813	1.7557	1.78483
	grxA	U00096.3:890495-890753		13.3818	16.0419	24.7076		128.835	138.015	168.285		11.0817	14.1769	28.0499		2.7091	5.93938	15.9925		7.35549	11.8525	4.78936
	nfsA	U00096.3:890912-891906		18.1275	20.074	22.6566		15.8268	18.3752	25.2231		17.41	10.5827	18.0191		12.0437	21.9827	9.91794		10.7644	7.22124	7.95956
	ybjC	U00096.3:890912-891906		51.2805	114.241	116.751		109.24	83.7382	52.1138		175.503	63.3693	33.5434		54.6586	38.5655	43.7475		44.9453	35.7074	41.7374
	rimK	U00096.3:891966-892869		20.267	12.8094	21.9292		17.7203	26.7222	24.8879		30.822	16.3597	15.4657		15.0762	11.2287	15.1539		14.6167	7.49462	8.28544
	ybjN	U00096.3:892956-893433		27.3392	28.1323	38.4347		21.5456	42.3847	33.1526		7.22434	17.1542	25.7926		15.2902	12.3361	22.2232		26.4431	21.7742	13.7528
	potF	U00096.3:893783-894896		0.710348	0.840867	0.193444		0.258212	2.09528	1.71412		0.279915	2.43253	2.67066		5.19661	2.60483	3.4094		4.17036	4.12379	3.70119
	potG	U00096.3:894990-896124		0.843576	0.675322	1.04619		0.432402	0.960725	0.496554		1.94361	2.73838	1.90759		3.37465	2.14551	2.46457		2.00732	3.05279	2.11983
	potH	U00096.3:896133-897929		0.216785	0.198722	0		0	0.27636	0.642335		0.265363	0.471395	0.323771		0.842879	0.870717	0.771423		1.3516	0.797522	0.796533
	potI	U00096.3:896133-897929		0.900419	0.126041	0		0.767363	0.59799	0.897191		0	0.556485	3.26405		1.64964	1.53856	2.69156		4.39181	1.89706	2.06503
	ybjO	U00096.3:897988-898477		1.51664	3.21372	1.71598		4.46901	3.89728	3.65194		13.6392	3.03794	6.36193		3.78409	4.10281	1.9861		3.70538	1.55234	1.42344
	rlmC	U00096.3:898517-899645		4.89175	3.17628	4.41963		4.97349	8.16892	8.53176		7.41829	9.36997	7.27648		7.50761	5.92691	6.35808		6.92384	6.89732	4.40028
	artJ	U00096.3:899843-900575		4.59902	8.34657	6.00115		3.06734	4.02591	3.49993		4.24302	3.56324	5.87891		7.09502	6.20378	2.63918		7.90062	4.18079	3.23751
	artM	U00096.3:900865-902250		11.5849	9.38048	6.17379		24.1036	26.8875	21.3688		11.7072	8.45145	9.28856		11.9743	11.5701	3.90624		11.155	9.98533	6.21593
	artQ	U00096.3:900865-902250		15.771	17.4217	20.3452		20.7441	21.5716	17.591		18.1909	11.874	19.4268		18.6629	9.34103	5.10262		7.34015	9.80142	4.49927
	artI	U00096.3:902256-902988		12.4484	20.9082	22.5826		18.0344	14.7581	20.3049		16.867	8.16854	4.72291		12.5512	19.5082	5.81749		8.08103	7.11855	8.64837
	artP	U00096.3:903005-903734		7.97406	10.8409	8.50474		10.2617	9.52735	14.3142		9.00965	5.88406	5.4928		6.53065	7.53423	6.87493		8.06079	5.35996	4.81993
	ybjP	U00096.3:903951-904467		10.3045	22.8562	31.2258		21.429	11.3012	41.093		50.9507	22.7872	14.2367		14.0574	6.29976	5.86766		8.40207	4.25331	7.27516
	amiD	U00096.3:904592-906753		2.35581	5.87801	6.41925		4.77331	4.73637	8.82478		5.5704	2.10485	1.12297		3.08146	6.02118	2.51778		4.8417	1.6545	4.14556
	ybjQ	U00096.3:904592-906753		28.5712	38.1778	30.668		18.8868	17.3614	38.057		17.9511	24.508	17.5891		10.5826	7.06277	4.8276		4.45318	10.826	9.72514
	ybjS	U00096.3:904592-906753		7.85947	8.47182	9.68857		8.34308	9.81196	16.0106		12.2306	7.16462	6.76161		11.2739	7.67748	6.48832		10.9428	8.04129	8.01458
	ybjT	U00096.3:906851-908282		3.71917	6.30418	6.34915		4.18369	3.81997	5.86348		2.66169	1.67171	5.25955		4.35263	3.60974	2.41779		4.24022	4.3302	3.89181
	ltaE	U00096.3:908292-909294		3.51031	7.27235	11.3808		8.11202	4.22971	3.51282		9.06917	6.7833	4.98593		5.80288	5.46268	4.80288		6.97214	6.97784	8.19731
	poxB	U00096.3:909330-911049		1.41574	2.17156	2.22388		2.02078	2.64661	3.1837		3.91911	3.31716	7.65646		5.54138	6.86661	8.97157		10.7887	4.51695	9.72329
	hcr	U00096.3:911181-912150		0.474948	1.02363	0.788006		1.48385	1.20063	1.0599		6.17665	2.87935	4.93513		3.00527	3.18852	2.80276		5.61379	4.26124	4.07629
	hcp	U00096.3:912161-913814		0	0.574081	0.461804		0.139234	0.127377	0.289398		0.761876	0.652963	0.784691		1.13966	1.10202	0.634345		0.4418	0.105688	0.610839
	ybjE	U00096.3:913957-914857		5.05518	3.68448	2.15212		4.99489	5.55346	5.1257		5.47984	12.8257	12.0517		11.2064	7.85536	10.3208		8.25777	7.49211	4.29434
	aqpZ	U00096.3:915351-916047		0.244321	1.58091	2.53852		2.14953	2.61881	1.7227		1.45742	1.78351	4.2269		4.72794	5.03932	1.06808		3.9516	1.47267	3.4493
	ybjD	U00096.3:916472-919120		2.10608	3.88349	4.11915		4.17598	2.55385	2.67195		2.65563	2.97562	1.73071		1.95116	3.11422	3.25168		2.93075	1.98425	1.78283
	ybjX	U00096.3:916472-919120		31.4665	51.5157	57.4256		56.6796	80.9402	101.953		82.6728	81.9057	119.484		105.15	78.4118	72.0566		104.507	60.0838	52.667
	macA	U00096.3:919234-922293		3.2545	4.1033	2.20375		2.6511	3.26396	6.35846		4.45179	3.25152	4.6267		10.2161	7.38013	5.28083		8.35414	10.427	6.61229
	macB	U00096.3:919234-922293		3.91914	7.16628	7.86963		4.32425	5.39491	6.37693		11.1567	9.4886	13.1948		18.9912	16.5233	17.4483		17.4022	13.4492	15.6652
	cspD	U00096.3:922365-922590		552.784	790.654	316.075		129.368	115.59	140.529		169.442	47.5517	47.7517		82.92	66.2961	128.383		177.77	213.216	336.359
	clpS	U00096.3:922912-923233		66.9653	94.8688	145.444		45.5861	31.5413	52.5525		45.7412	32.9919	39.6071		105.362	172.495	116.926		132.873	57.4522	148.095
	clpA	U00096.3:923263-925540		26.3965	59.4635	39.0017		52.1174	38.066	32.4929		30.8192	25.1762	31.4053		62.423	57.6259	51.3714		61.3133	57.7172	57.1367
	serW	U00096.3:925883-925971		661990	583929	254837		880610	1221040	879482		1348860	1174580	1370440		2709130	1052880	1053460		852149	891685	951034
	infA	U00096.3:926224-926443		888.421	315.487	333.314		1002.97	916.27	2162.19		1561.4	1352.94	678.521		1242.66	823.038	931.2		928.349	463.992	543.084
	aat	U00096.3:926727-927432		10.1924	8.13048	3.13574		10.9885	13.3122	13.1372		9.37779	12.2653	5.50992		12.2165	8.36237	5.36606		7.90794	4.69645	2.4012
	cydC	U00096.3:927473-929195		7.08926	5.70216	6.59338		7.23196	7.46799	11.4651		7.72039	5.32439	5.3605		3.81365	4.12139	2.80071		4.18021	4.02921	3.38381
	cydD	U00096.3:929195-930962		2.8569	5.14358	3.86297		4.33996	4.66895	4.6587		3.78306	3.75374	2.47765		2.96055	2.41724	2.62744		2.10865	2.13883	1.85195
	trxB	U00096.3:931084-932050		62.4022	44.0912	53.1381		82.1991	65.0984	74.9292		47.6172	59.9489	52.2457		41.232	28.5249	19.281		24.9072	25.3868	23.2272
	lrp	U00096.3:932594-933089		47.52	84.713	82.5485		64.8683	30.6428	50.9599		22.837	12.8948	18.7803		37.3475	32.7312	40.8903		61.6965	29.4241	45.3585
	ftsK	U00096.3:933223-937213		14.8656	15.3915	15.3817		19.5788	16.3574	17.2388		10.2744	8.2726	9.30346		10.8811	9.82415	6.42566		11.9287	11.8587	9.72519
	lolA	U00096.3:937371-937983		14.4732	20.6737	20.3603		20.4179	18.2459	35.758		19.7154	18.1502	13.777		21.8966	24.231	14.8443		19.5969	10.2767	23.5731
	rarA	U00096.3:937993-939337		5.85318	7.1877	6.62814		13.0529	13.2235	16.8559		17.7072	3.57085	13.8302		6.88027	12.0992	10.8945		12.0352	7.4846	11.8739
	serS	U00096.3:939427-940720		104.05	125.069	123.694		150.484	160.066	132.651		94.7543	74.6034	61.2279		57.6101	45.1117	46.0959		62.7857	65.1782	53.1321
	dmsA	U00096.3:940958-943403		0.823166	2.8082	2.05379		1.23036	1.10245	0.943899		0.880716	1.35819	1.26577		1.7469	1.49744	1.39884		1.15899	1.51086	1.28119
	dmsB	U00096.3:943413-944031		0.890291	4.1521	2.75431		2.14895	5.85053	4.86249		16.5635	4.49418	3.62213		7.45526	8.66675	6.20991		9.85379	5.32452	6.59233
	dmsC	U00096.3:944032-944896		1.73205	1.29486	1.07779		0.917976	1.26635	2.10556		7.36943	3.66174	5.83536		3.6843	6.46604	3.7978		5.15705	1.93273	2.99029
	ycaC	U00096.3:944930-945557		0.73105	2.0633	1.1559		4.26188	5.43816	3.21809		2.93883	4.88041	1.4897		3.16388	3.21478	0.646779		6.04132	3.57453	2.28383
	ycaD	U00096.3:945870-947019		1.41394	2.27954	2.37667		3.07653	4.44407	6.89006		4.9483	4.60171	2.38978		7.11746	5.00322	1.44191		2.20364	2.18196	1.90167
	ycaM	U00096.3:947228-948659		6.49964	4.51529	2.37093		0.342426	0.893908	2.29169		0.975397	1.6784	1.64148		1.0607	0.939198	2.98641		3.67772	3.41946	1.38657
	ycaN	U00096.3:948659-949568		2.75196	4.09358	1.45508		3.92684	1.05382	1.80684		0.72338	2.08649	1.53228		2.02377	0.89344	3.05533		2.27523	2.65255	0.577898
	ycaK	U00096.3:949667-950258		3.1495	5.0105	0.535942		0.617023	5.04985	2.10084		10.5321	4.43908	2.81396		4.78623	1.98626	3.27339		3.76625	2.50718	2.34547
	pflA	U00096.3:950339-951080		13.1256	11.2055	10.2358		16.5547	14.5325	20.1903		44.348	20.5613	28.886		36.7117	25.4572	12.9814		24.0355	17.6442	19.386
	pflB	U00096.3:951271-953554		97.5564	127.856	117.444		118.51	181.391	163.092		211.919	187.333	192.909		219.094	166.894	162.202		175.421	176.93	122.589
	focA	U00096.3:953608-954466		11.1595	42.1575	76.3437		14.833	9.70636	17.2961		10.1727	5.38065	11.6368		5.98347	9.16526	9.02919		8.10037	6.2346	5.79622
	ycaO	U00096.3:954871-956632		19.7321	11.5294	6.35098		18.9254	28.2953	31.5957		31.7582	33.1152	31.2522		32.7612	27.9477	24.2899		22.6294	19.0184	18.8061
	ycaP	U00096.3:956761-957454		1.28741	2.27206	3.11795		2.44723	0.982355	4.76272		9.38794	2.38353	7.88151		6.72276	4.90075	6.34277		8.96285	6.01618	4.38712
	serC	U00096.3:957652-958741		16.3051	50.8051	43.8046		36.5123	40.8693	19.9275		11.9492	15.1071	13.0736		12.5689	15.9598	13.7506		22.09	16.9871	12.4511
	aroA	U00096.3:958811-960095		6.6412	9.85998	15.7753		17.1328	12.286	14.0125		15.4427	5.65601	6.42548		5.01663	6.7625	8.24782		8.02634	8.32511	5.98251
	ycaL	U00096.3:960263-961028		1.33134	1.25528	0.714887		2.74138	0.480933	3.24207		3.12335	2.02511	1.2216		1.09532	3.18865	1.96116		0.832052	1.76942	1.75736
	cmk	U00096.3:961200-961884		108.596	64.287	58.576		132.005	133.592	172.48		260.062	164.606	116.038		145.564	147.716	83.9338		116.991	76.3662	88.0988
	rpsA	U00096.3:961994-963668		832.94	396.705	199.414		581.552	634.204	703.726		1198.11	689.639	844.676		785.035	845.481	601.519		676.163	559.606	484.299
	ihfB	U00096.3:963827-964112		703.389	636.674	385.043		652.211	883.255	1032.64		831.725	811.495	549.891		777.809	644.58	313.72		634.864	364.113	540.614
	ycaI	U00096.3:964319-966584		0.648398	0.682673	0.379219		0.807347	0.59875	0.995493		0.589639	0.605951	1.76297		0.993902	0.911361	1.20577		1.00585	1.05042	0.710894
	lpxK	U00096.3:966620-969352		11.7911	4.15795	7.00814		11.1685	9.56033	17.192		18.5684	10.6026	7.88596		9.83022	11.814	10.0042		7.7128	5.28488	7.88964
	msbA	U00096.3:966620-969352		25.3627	20.166	19.4653		27.503	42.4967	37.924		20.561	20.1076	28.7799		25.7345	18.9834	15.5739		15.7918	15.7188	10.1466
	ycaQ	U00096.3:969388-970621		1.29354	1.29182	1.73451		1.04089	1.96574	2.19567		2.67067	1.79125	0		1.88333	1.28661	0.399967		1.1356	0.574522	0.61622
	kdsB	U00096.3:970672-971598		36.9925	39.1177	28.3743		42.0503	41.2076	51.6468		60.8752	32.0755	54.5779		33.5145	29.7441	18.1312		20.7433	15.2397	19.3198
	ycaR	U00096.3:970672-971598		191.279	336.323	157.949		378.818	294.26	335.585		184.251	294.547	194.683		242.272	101.153	160.334		163.328	204.55	58.8875
	ycbC	U00096.3:971751-973401		5.10222	4.40731	3.73604		3.99512	6.04993	5.55255		7.89896	12.7384	12.5809		9.23876	10.2059	11.5251		12.412	7.32671	8.59205
	ycbJ	U00096.3:971751-973401		0.943104	2.25403	3.80163		0.733472	0.5552	1.40863		0	0.306823	1.61376		1.18014	0.494177	1.22524		2.59006	0.608774	1.31789
	mukB	U00096.3:973536-980786		19.5397	21.2789	16.7774		28.1877	29.0796	28.1755		35.958	33.8448	35.0273		42.0099	37.6733	29.9959		35.3617	33.0546	28.5566
	mukE	U00096.3:973536-980786		14.5156	14.101	12.9184		23.7393	21.4313	18.7444		39.1305	40.1833	33.9563		45.3733	26.4833	15.4261		32.7786	36.123	29.8633
	mukF	U00096.3:973536-980786		18.1727	17.4371	19.6269		19.1218	16.3174	22.7646		16.6903	14.308	16.0968		13.966	19.434	10.8045		14.9419	14.5111	12.7553
	smtA	U00096.3:973536-980786		14.604	19.217	22.6074		13.3078	16.3326	32.693		15.2532	7.04988	11.6444		16.6619	19.9889	11.2076		13.7413	9.67085	13.6918
	ldtD	U00096.3:981046-982894		4.50276	9.18464	9.44553		5.84019	5.68468	5.58464		8.16662	6.51329	8.47449		10.5903	6.04244	5.91757		6.12725	5.08763	6.14397
	ycbK	U00096.3:983074-983623		42.7441	53.3381	39.6013		109.979	113.473	213.437		697.153	500.979	712.341		690.988	829.144	813.777		1591.56	1458.6	1445.99
	ycbL	U00096.3:983649-984297		48.1219	55.3013	56.3259		80.2173	102.912	150.142		780.468	555.023	626.646		841.181	818.082	840.214		1527.35	972.36	1435.29
	aspC	U00096.3:984518-985709		36.5938	60.3608	45.4147		73.1105	51.554	52.6303		56.3978	36.9613	31.7477		35.7129	29.2147	18.4311		28.468	21.6267	20.8674
	ompF	U00096.3:985893-986982		218.39	366.856	428.769		135.334	107.513	108.777		15.0152	11.6428	8.12321		3.65907	2.91075	5.73719		4.36048	2.79863	2.83116
	asnS	U00096.3:987584-988985		109.088	94.8923	93.041		118.361	151.627	136.836		68.6292	77.8559	76.4513		50.6381	58.8389	43.0873		58.5232	59.5799	46.1621
	pncB	U00096.3:989153-990356		16.631	20.0331	17.5162		16.8626	15.731	20.3199		8.57772	9.2926	11.581		7.73584	8.60268	7.54991		9.84446	5.39673	7.78418
	pepN	U00096.3:990621-993234		25.8259	50.034	36.27		36.4134	39.1501	27.832		31.2546	18.8467	20.8582		19.0935	11.8188	13.0031		21.6899	20.8861	19.063
	ssuB	U00096.3:993276-994832		0.94525	0.45203	1.06703		0	0.826743	2.69281		3.12765	3.16261	2.8093		2.42421	1.88293	3.50465		1.89637	0.87384	2.46279
	ssuC	U00096.3:993276-994832		0.269996	0.0807678	0		0.280381	0	0		0	1.43658	0		0.367084	0.884772	0		0.709787	0.428117	0.371888
	ssuA	U00096.3:994842-997512		0.129781	0.263643	0		0	0.138977	0.596327		0.95794	0	1.52657		0.618451	0.143798	0.715588		0	0.674592	0.23681
	ssuD	U00096.3:994842-997512		0	0.200237	0		0.464505	0.106958	0		0.306505	0.294205	0.367095		0.523776	0.55265	1.63721		1.38514	0.798572	0.440847
	ssuE	U00096.3:994842-997512		0	0.172915	0		0	0	0.521753		0	0	0		0.622718	0	0.765111		0	0.226516	0.720674
	elfA	U00096.3:997867-998407		1.08465	0.576089	0.422179		1.00517	3.104	2.52683		1.23033	1.24043	3.38202		3.9443	1.60058	2.90784		3.80346	0	0.612599
	elfD	U00096.3:998489-999191		0.249058	0.174561	0.432941		0	0.204086	0.526897		0	0	1.56678		1.1718	0	0		0.436777	1.41148	0
	elfC	U00096.3:999215-1002877		0.0431712	0.576163	0.251519		0.4854	0.703654	0.7493		2.38705	1.00908	1.35617		1.42261	1.16243	1.69394		2.3588	1.50963	1.22058
	elfG	U00096.3:999215-1002877		1.11214	1.74199	2.3078		1.51519	3.54163	3.36004		6.60366	7.2346	6.58034		5.87786	6.50933	5.3833		7.85854	8.05287	4.20075
	ycbU	U00096.3:1002888-1003431		1.10469	0.372477	3.74309		0.544852	0.47761	3.53344		10.5393	4.57122	9.80829		4.30319	8.91	7.625		9.15933	5.11392	3.96626
	ycbF	U00096.3:1003438-1004657		0.211377	1.13239	1.19828		3.82179	4.41824	2.45783		2.71374	6.4236	5.64173		10.8621	10.5114	12.9959		10.7957	9.06055	7.61342
	ycbV	U00096.3:1003438-1004657		0	0.226289	0.221564		0.574541	0.151296	1.19781		7.52636	8.88814	1.52664		8.19766	4.41191	1.76118		3.54476	2.86314	3.061
	pyrD	U00096.3:1004767-1005778		6.01937	3.0644	2.49462		6.58304	9.55346	12.5487		8.36037	5.84884	9.23304		4.51716	3.71699	6.9973		4.26665	4.3529	3.85684
	ycbX	U00096.3:1005951-1007600		12.102	17.8809	15.5718		12.0471	11.7313	10.4216		10.3117	5.78183	9.50184		11.7744	8.15437	9.69566		21.3892	10.2672	13.5368
	zapC	U00096.3:1005951-1007600		13.3129	19.5551	20.3715		16.2272	15.1453	10.1407		17.4969	7.46328	4.51378		12.7212	4.17317	10.1866		26.4692	10.67	11.0324
	rlmL	U00096.3:1007843-1009952		12.6648	8.31355	9.76229		13.4303	15.2886	16.8444		12.9287	9.43516	11.3439		14.341	11.3204	11.8967		10.8695	11.7477	7.42912
	uup	U00096.3:1009963-1011871		11.2771	6.15222	5.39694		17.8955	24.2504	40.656		49.0624	58.2353	56.1541		72.4365	64.8528	64.5629		67.2984	57.0278	64.6739
	pqiA	U00096.3:1012000-1013254		4.37139	2.22672	4.28582		14.2428	14.5826	25.5493		87.6069	86.8567	116.48		108.827	84.3873	86.4855		88.8019	65.8725	57.3773
	pqiB	U00096.3:1013258-1015459		7.36222	6.36865	5.05045		6.95305	18.5167	24.9522		108.955	107.489	151.4		134.597	170.541	147.378		142.676	129.523	114.686
	pqiC	U00096.3:1013258-1015459		14.3783	10.3164	13.0303		22.7575	37.3212	41.3697		263.472	258.11	385.23		348.086	369.87	342.219		406.646	186.574	222.388
	rmf	U00096.3:1015714-1015882		76.452	240.451	98.1318		162.13	277.789	281.193		212.008	192.736	126.009		106.444	57.5269	118.614		132.498	51.4645	126.011
	fabA	U00096.3:1015951-1016470		220.438	156.233	102.251		174.813	175.284	254.171		136.649	107.17	140.541		212.45	314.837	324.687		433.131	207.128	391.854
	ycbZ	U00096.3:1016538-1018299		15.6867	11.1815	14.0345		18.4459	15.4487	20.5656		18.6481	17.5447	17.3106		23.6313	16.8389	16.1233		17.5054	12.5491	12.1416
	matP	U00096.3:1018484-1018937		42.7989	33.3931	33.0407		19.7759	24.7602	34.1305		27.6583	55.3123	26.4369		49.0061	24.4517	24.2445		37.9811	25.2656	29.696
	ompA	U00096.3:1019012-1020053		1252.25	1236.49	1193.43		1215.74	1313.15	1167.37		168.376	115.019	148.697		82.0405	94.3617	66.195		65.1575	49.8262	52.1546
	sulA	U00096.3:1020409-1020919		10.8442	16.5907	17.3771		3.68445	7.77718	23.0099		22.8927	12.872	14.7944		16.6065	7.18429	11.4445		24.9717	15.8168	18.5578
	sxy	U00096.3:1021137-1023883		3.26279	7.42999	2.36931		1.92314	4.80072	2.97026		2.31641	4.37909	3.03228		5.42239	4.72126	5.31325		5.16773	2.04935	2.72627
	yccS	U00096.3:1021137-1023883		8.95834	4.42085	5.04346		7.29127	11.1674	11.5314		9.72963	9.43723	12.8239		11.1065	7.26208	7.91738		7.62394	7.27217	5.39406
	yccF	U00096.3:1023901-1024348		10.8996	7.75659	4.54823		9.97534	13.1295	8.6442		7.73348	4.64907	14.5305		3.50642	9.76071	8.89636		3.26986	2.80631	1.16521
	helD	U00096.3:1024470-1026525		6.86144	11.341	13.1632		9.78896	8.16681	9.54922		6.7998	2.85108	4.55701		5.19908	4.02978	4.36927		4.80484	4.43391	2.8085
	mgsA	U00096.3:1026556-1027015		30.6274	33.0266	24.4617		24.9418	19.6505	20.1511		8.98386	12.7566	7.46386		6.64268	7.57633	4.58157		13.9121	12.9317	17.5398
	yccT	U00096.3:1027110-1027773		0.512043	0.349099	0		0	0.884962	0.634948		0	3.25521	2.48094		6.61146	3.34615	5.66902		3.53932	5.43981	3.61692
	yccU	U00096.3:1027945-1028359		14.7796	14.0793	24.8858		21.5325	14.5745	41.1983		54.1551	22.1638	38.317		42.0379	25.7878	30.2593		38.8171	18.6082	39.5447
	hspQ	U00096.3:1028403-1028721		60.8784	83.6126	89.62		47.5948	34.9505	53.7851		56.7924	62.7378	72.991		152.195	226.176	84.4428		102.715	83.8101	115.989
	rlmI	U00096.3:1028778-1029969		20.4668	12.1067	13.9475		15.7672	20.5275	15.9637		17.1233	16.653	18.3713		12.973	15.2574	16.8127		13.7623	14.2139	11.4748
	tusE	U00096.3:1030063-1030668		90.2207	41.5549	62.857		65.3997	62.7719	99.2482		42.5489	45.9117	46.9537		54.8077	34.3365	32.1862		47.5734	37.4107	29.9996
	yccX	U00096.3:1030063-1030668		4.42042	16.4769	33.8637		4.96965	5.70235	19.956		13.9571	13.0625	66.19		10.0697	34.3534	14.1054		36.7891	12.6169	25.5579
	yccA	U00096.3:1030758-1031418		47.9469	83.112	103.856		86.579	54.5712	109.066		77.3544	45.8344	50.0688		87.7726	62.6794	46.962		92.9851	56.871	71.427
	serT	U00096.3:1031624-1031712		62354.9	21741	101067		69869.2	24559.8	73918		161428	63906.2	156433		78359.5	78493.3	97457.4		27712.4	80278.2	122445
	hyaA	U00096.3:1032138-1035047		0	0	0		0.168227	0.0714562	0.19194		0.218699	0	0		0	0.471061	0.0946726		0.264364	0.0743745	0.226423
	hyaB	U00096.3:1032138-1035047		0.14981	0.0510201	0.435831		0.148351	0.205053	0.163525		0.527225	0.841743	0.225604		0.620401	0.678875	0.974158		0.958744	1.14922	1.20306
	hyaC	U00096.3:1035065-1037606		0	0.130791	0.365553		2.28097	3.83965	1.45101		7.51971	11.3679	11.37		15.4646	9.1468	11.9282		12.6744	7.42423	8.35657
	hyaD	U00096.3:1035065-1037606		0.345851	0.637595	0.607909		0.668666	0.337652	3.04037		20.1985	7.56683	31.0322		21.6586	17.0979	8.89811		14.7678	14.0082	15.3949
	hyaE	U00096.3:1035065-1037606		0.429439	0	0		0	2.07457	3.59166		13.1621	11.6169	13.0534		8.50469	12.1664	10.3096		16.1854	13.4583	12.2722
	hyaF	U00096.3:1035065-1037606		0.323339	0.307085	0		0.338847	0.156032	2.95512		13.24	3.50858	7.54465		7.58811	5.20824	4.71704		6.40611	3.54241	4.51365
	cbdA	U00096.3:1037739-1039284		0.627185	0.95177	1.07741		1.57996	2.33183	2.18169		12.6163	7.05476	7.8952		13.5109	6.00914	3.03771		6.33211	4.99168	2.89331
	cbdB	U00096.3:1039295-1040432		0.672741	1.08602	0.548519		1.14715	0.996107	1.91174		4.99971	2.45041	5.24079		9.41319	2.45692	2.4001		4.93041	5.89127	2.8605
	cbdX	U00096.3:1040444-1040537		0	140.886	0		0	181.863	0		95.779	666.438	563.989		234.163	323.513	955.895		255.941	300.438	119.988
	appA	U00096.3:1040616-1041915		0.27678	2.5706	0.880067		0	1.78028	0.869139		11.224	5.44834	6.50489		4.4457	7.68856	5.28301		5.78887	4.21441	4.81732
	etk	U00096.3:1042029-1044210		1.43373	2.43635	3.76795		2.89615	3.2048	4.65012		15.9893	12.7807	23.4804		21.3324	23.9024	25.8534		23.1711	13.6621	12.3887
	etp	U00096.3:1044229-1045803		0.712502	0	1.20637		1.99923	1.0253	3.47959		18.4694	8.1283	15.2293		20.0939	23.5969	10.4983		9.84314	2.86654	9.4035
	gfcE	U00096.3:1044229-1045803		1.69132	1.07638	1.55079		0.73172	2.09186	3.47192		10.2192	1.80883	10.0238		9.4278	5.65315	6.60734		8.25087	5.04257	4.81763
	gfcB	U00096.3:1045848-1049332		0	0.642873	0		1.36398	1.36364	1.05049		1.7021	2.7021	1.35377		4.13048	1.98356	2.10799		1.90693	0.589333	2.83124
	gfcC	U00096.3:1045848-1049332		0.883148	0.299934	0		0.80902	0.393033	1.64225		2.08501	1.84523	2.78126		2.10396	2.24659	1.70426		2.87993	1.33017	1.52427
	gfcD	U00096.3:1045848-1049332		0.339332	0.42564	0.408044		0.916689	0.564904	0.999121		1.14448	1.45672	2.39061		1.53685	1.94266	0.501485		2.21017	1.69084	0.831348
	gfcA	U00096.3:1049438-1049744		0	0.712514	1.36756		0	0.844555	6.08941		10.6727	8.36531	7.53216		5.00111	3.33283	3.98532		7.43806	4.94393	7.31851
	cspH	U00096.3:1050962-1051175		0	0	0		0	0	10.0288		0	16.6511	0		14.0302	5.13695	0		15.588	9.22186	3.76673
	cspG	U00096.3:1051460-1051673		21.4794	4.06671	4.55658		5.17083	49.2445	17.4931		6.08793	22.1737	0		12.0585	9.12536	40.1505		0	2.79158	12.2226
	gnsA	U00096.3:1051846-1052240		395.788	576.993	355.38		186.968	451.38	474.428		113.142	82.4657	120.811		61.1866	28.4916	32.7768		214.005	93.9055	98.5241
	ymcE	U00096.3:1051846-1052240		91.8621	205.805	94.4389		124.752	122.814	129.59		55.0876	22.984	18.3917		45.1293	12.1134	32.2857		34.1437	36.771	55.5439
	yccM	U00096.3:1052288-1053362		0.273607	1.50395	0		0.525591	0.499212	0.290863		0.903181	1.82543	2.29081		1.58679	1.37991	2.78006		1.07711	1.40905	1.20643
	torS	U00096.3:1053433-1056178		0.473551	0.358577	0.204662		0.285858	0.242394	0.711696		0.454935	0.429921	0.766934		0.733719	0.488517	0.885952		0.958383	0.691171	0.741743
	torR	U00096.3:1056260-1057954		9.7615	4.66436	3.35448		3.96632	3.60123	3.88314		7.4467	7.99218	0.703891		7.69939	5.16658	2.59775		4.5196	5.02495	5.41093
	torT	U00096.3:1056260-1057954		0.745953	0.982599	3.62918		0.501289	0.567374	0.933665		0	1.08211	0.956186		0.492898	0.854961	0.627404		0.232395	1.39644	0.818133
	torA	U00096.3:1058083-1062398		0.316095	0.171992	0.187791		0.443172	1.30854	0.931982		1.60994	2.00488	1.37563		2.46006	1.74117	3.14125		2.74214	2.69503	1.91765
	torC	U00096.3:1058083-1062398		0	0.233039	0.207226		0	0	0		0	0.948109	0		0.844093	1.79129	1.01128		2.33441	1.77816	0.931185
	torD	U00096.3:1058083-1062398		1.25006	0.332476	0.858643		1.92892	2.57229	1.20946		5.41401	3.35635	1.62469		4.4461	3.00552	1.50773		7.1946	3.78101	3.25339
	cbpA	U00096.3:1062549-1063775		5.64866	11.9952	13.6944		3.44472	4.24299	15.7499		11.8054	5.48575	4.5641		3.28206	4.87632	4.95224		5.45182	3.89831	6.67362
	cbpM	U00096.3:1062549-1063775		6.14127	4.57323	14.9075		19.6353	8.72411	19.6798		27.798	11.5897	7.00027		15.1271	30.3062	13.2277		6.94459	9.64978	12.8715
	yccE	U00096.3:1064035-1065292		0.447581	0.396017	1.36557		0.586603	0.569206	0.746849		0	0.272957	0		0.569728	0.0921748	0.591619		1.21442	0.384104	0.357389
	agp	U00096.3:1065584-1066826		9.80047	16.9219	21.5989		9.08902	6.00402	5.66942		10.3343	4.93424	5.76663		5.85795	3.32054	2.98639		8.22192	4.87319	8.57901
	yccJ	U00096.3:1066863-1067091		6.13703	42.5429	67.0458		46.8799	61.1893	29.9745		11.0543	43.9343	21.8098		55.2863	47.5643	40.7245		46.4235	25.4537	42.9014
	wrbA	U00096.3:1067111-1067708		2.68742	14.4444	8.68308		5.31363	7.15718	14.1617		9.52528	3.59752	11.7766		10.0854	14.6694	7.0668		10.0146	4.8106	13.3221
	ymdF	U00096.3:1068080-1068254		0	10.947	0		31.5482	19.4993	56.8664		151.377	38.7547	28.9636		62.8182	171.682	84.3676		118.596	50.1108	264.244
	rutG	U00096.3:1068510-1069839		0.223331	0.327019	0.898539		0.357288	0.25114	1.03411		0	0.792534	1.3419		0.943947	0.431726	1.02874		1.37349	0.842989	1.00009
	rutF	U00096.3:1069859-1070354		0	0.499378	0		0	0.278238	0		4.26169	0	0		0.735294	0	2.02901		1.45233	0	0.929036
	rutE	U00096.3:1070364-1070955		0	0	0		0	0	0		0	0	0		0	0	1.43654		0	0	1.11092
	rutD	U00096.3:1070964-1071765		0.18046	0	0		0.366625	0	0		0	0	0		0.373963	0.394176	0.464487		1.48992	0.616117	1.04065
	rutC	U00096.3:1071772-1072159		0	0	0		0	0	0		0	0	0		1.50392	0	0		0	0	0
	rutA	U00096.3:1072170-1074011		0	0.08706	0		0	0.301647	0.273321		0.293656	0.472033	0		0	0.136231	0.160152		0	0.0891589	0.232669
	rutB	U00096.3:1072170-1074011		0	0	0		0	0.188251	0		0	0.584907	0		0.47563	0	0		0	0.536606	0
	rutR	U00096.3:1074241-1074880		4.15309	7.61304	6.351		7.95777	4.04144	2.4238		7.26544	6.28991	3.71614		4.40757	4.43392	0.866299		7.36403	3.77484	4.19996
	putA	U00096.3:1074919-1078882		10.4009	34.5004	19.0978		13.8333	8.5209	5.62599		3.8997	3.87501	4.11975		4.70991	4.56903	3.97267		8.85489	12.1713	13.4767
	putP	U00096.3:1079304-1080813		19.7005	34.3865	27.7668		10.2516	9.53668	12.9589		14.2627	6.17885	8.43957		12.2548	6.15399	12.4014		22.8667	24.8679	36.4601
	efeU	U00096.3:1081355-1082185		7.29957	2.10306	2.30686		2.58708	3.85115	3.04173		6.69371	2.33064	2.85725		1.10974	1.57429	0.780818		3.18002	0.978851	1.72801
	efeO	U00096.3:1082242-1083370		7.91024	7.67604	6.5329		4.68426	4.31653	5.18686		8.16839	6.58247	3.65846		3.5703	3.6845	4.39445		3.14572	1.49565	2.29845
	efeB	U00096.3:1083375-1084647		9.62088	4.71088	4.32062		2.47555	4.80646	4.73015		11.0237	4.3815	4.47042		4.33809	4.32499	4.11555		6.3687	1.57396	4.16542
	phoH	U00096.3:1084991-1086056		2.48136	2.42289	0.203381		0.238168	0.337583	1.68757		1.44611	2.91291	2.62014		3.02196	1.4095	2.88327		5.93706	4.07714	6.79793
	pgaD	U00096.3:1086105-1086519		3.37638	3.10514	1.26648		1.1081	4.38563	8.12418		4.36566	1.44186	0		4.52705	5.95416	3.61907		6.40581	8.5278	6.94531
	pgaB	U00096.3:1086520-1089857		0.969681	1.25808	1.03475		1.43014	1.75411	1.97786		0.818132	2.80693	1.47246		1.749	0.719854	0.76111		1.10748	1.17753	0.576506
	pgaC	U00096.3:1086520-1089857		0.648129	0.639239	0.349399		1.1805	1.17046	1.13393		1.44112	2.18572	1.20313		2.4462	2.25799	1.64249		1.18027	2.69848	0.833051
	pgaA	U00096.3:1089865-1092289		1.17928	3.0585	1.2798		3.76878	2.7182	3.9223		2.91305	1.90482	3.04456		1.15265	0.870599	1.18629		1.49201	0.935218	0.917473
	ycdT	U00096.3:1092875-1094234		0.733295	2.39686	1.5936		2.67613	2.35249	2.18775		0.78125	1.56307	1.39595		0.96769	0.811131	1.57926		1.9922	0.785715	0.770735
	ycdU	U00096.3:1095504-1096829		0.213967	0	0		0.450899	0.336966	0.515039		0.255378	1.07099	0		0.771622	1.24822	0.171714		0.187024	0.598875	0.182972
	ymdE	U00096.3:1095504-1096829		0	0	0		0	0	0		0	0	0		0	0	0		0	0	0.748271
	serX	U00096.3:1097564-1097652		321339	435567	429669		432856	486751	1236070		1091700	967468	1185870		1932220	958350	983611		774894	730946	834861
	ghrA	U00096.3:1097885-1098824		4.58452	15.1039	10.7735		12.6351	11.1656	11.9013		16.1995	7.09471	19.325		13.1385	11.0439	5.55231		10.6082	9.22345	6.86875
	ycdX	U00096.3:1098878-1099616		13.3017	26.9897	32.3104		25.4492	20.5024	25.7049		21.3785	33.7643	56.0778		37.8072	24.8641	28.0191		27.5912	18.6062	19.7499
	ycdY	U00096.3:1099639-1100194		15.4825	14.9042	20.192		22.1143	25.7401	33.1083		43.6425	32.9127	35.9057		30.966	30.2061	33.3549		28.3325	29.6118	23.7788
	ycdZ	U00096.3:1100295-1100787		101.191	50.7552	26.3914		28.983	26.2898	30.6455		22.7017	23.2117	32.5872		49.6772	36.3975	45.7907		42.9812	26.5696	24.3664
	csgG	U00096.3:1100850-1101684		1.40814	1.1814	1.82322		1.90559	2.00822	2.22422		1.48195	2.25965	2.85041		3.52685	1.78181	3.97822		2.65998	2.66625	2.41782
	csgF	U00096.3:1101710-1102127		0.507202	0.917112	0		1.57876	0	0		2.40307	0	3.4537		0.415337	0.501187	5.60074		3.02417	1.5358	2.75017
	csgE	U00096.3:1102151-1102541		0	0.40548	0		0.94401	0.739676	0		0	0	0		0	0	0		2.67525	0.395233	0.431369
	csgD	U00096.3:1102545-1103196		0.236155	1.14951	0		1.7512	0.210855	0.559618		0	1.52032	2.2696		1.19895	2.50953	2.01984		4.75519	2.16255	0.587661
	csgB	U00096.3:1103950-1104406		0	0.7174	0		0	1.49896	0		0	0	0		0.779871	0	2.02717		0	0.860434	1.67071
	csgA	U00096.3:1104446-1104902		2.08205	1.56114	0.962862		4.07403	2.42849	1.99663		0	1.16486	1.77771		3.74466	3.1487	1.96019		5.14913	1.9527	2.67204
	csgC	U00096.3:1104960-1105293		1.84377	0	0		1.78723	1.7422	0		3.15183	2.10327	0		3.9472	2.75456	0		1.18989	3.39304	0.742137
	ymdA	U00096.3:1105413-1105725		2.82064	0	0		3.50724	0.796952	0		2.17395	1.93022	0		1.57147	3.52199	1.70901		7.12774	2.36104	5.94267
	ymdB	U00096.3:1105819-1106353		2.52939	7.73246	11.3189		5.55407	4.71401	10.7336		7.88574	10.6848	5.94878		6.02457	7.03896	12.3452		12.822	3.24263	1.73066
	clsC	U00096.3:1106354-1107776		0.77952	1.25624	1.13152		1.49673	1.92033	1.88419		9.15958	3.7362	3.15741		6.06983	3.9134	2.45858		4.74301	3.09139	4.08587
	opgC	U00096.3:1107783-1108941		2.72104	2.06099	1.8689		2.59571	4.18557	5.95552		3.57022	4.73771	4.51894		6.27516	2.96825	3.64545		7.02345	4.01841	2.7744
	opgG	U00096.3:1109334-1113406		23.2728	33.2764	25.9118		98.3014	132.026	318.599		1265.79	902.815	1475.64		1369.01	1336.95	1117.75		1644.38	983.029	1117.07
	opgH	U00096.3:1109334-1113406		24.896	19.5489	17.9393		43.533	71.9297	89.4456		619.985	612.329	695.738		830.613	677.973	560.958		618.569	596.367	433.533
	yceK	U00096.3:1113578-1113806		1.93918	9.2216	0		7.59267	24.5941	72.2497		425.423	129.794	217.55		250.655	166.182	131.965		246.071	108.236	105.397
	msyB	U00096.3:1113806-1114181		6.9297	14.623	43.8314		14.1877	15.875	53.1354		63.7984	16.9406	26.0366		15.5514	3.76264	3.35865		7.71518	2.77184	5.7811
	mdtG	U00096.3:1114263-1115490		0.397592	0.793954	1.20389		1.03597	0.944589	1.08384		0	1.9131	0		2.54464	0.449915	0.862457		1.01589	0.680962	1.2579
	lpxL	U00096.3:1115661-1116582		26.7815	16.3534	13.8624		24.4578	37.1131	16.0153		13.5726	14.0149	11.5501		20.1114	17.2381	10.2715		16.9186	11.45	9.53445
	yceA	U00096.3:1116806-1117859		11.8306	4.0168	7.0686		10.2886	10.218	27.5448		16.8732	6.49712	14.5671		11.5866	11.593	8.59414		13.4114	5.42429	8.75745
	yceI	U00096.3:1117900-1118476		6.56414	11.852	5.52383		13.4481	10.9179	21.3512		12.4279	20.332	16.5142		41.0306	17.1672	21.0618		30.955	19.7977	15.3032
	yceJ	U00096.3:1118479-1119046		0.873852	1.676	1.97106		0.611245	2.35156	2.03953		1.81514	2.53832	5.1247		1.50223	5.11025	4.17839		6.45009	5.66905	4.15614
	yceO	U00096.3:1119306-1119447		0	0	0		0	0	0		0	0	0		0	10.3757	0		14.9557	4.74158	0
	solA	U00096.3:1119467-1120586		17.366	19.9109	19.2977		25.3866	16.1347	19.0493		14.6409	7.24169	6.49764		8.831	8.83534	9.64118		10.5703	12.6838	10.9792
	bssS	U00096.3:1120700-1120955		81.4967	157.404	287.886		99.7054	61.0888	58.8133		215.096	182.795	176.296		551.94	548.802	441.996		629.633	233.497	759.131
	dinI	U00096.3:1121241-1121487		44.9952	82.2053	49.0854		50.8683	75.8511	88.6175		36.6703	25.3465	22.1588		40.2551	37.9967	51.5586		47.2444	40.2685	28.2198
	pyrC	U00096.3:1121560-1122607		7.39274	7.79168	4.60009		3.94521	7.11743	11.1121		7.82702	7.13271	3.19732		2.43742	2.12817	1.41452		3.01613	1.59462	2.66967
	yceB	U00096.3:1122712-1123273		8.11705	10.7901	9.85205		4.01277	6.10621	4.77586		2.66329	3.10898	7.28915		4.34157	7.91887	7.61337		7.56326	1.15468	8.5744
	grxB	U00096.3:1123406-1124054		15.5053	40.9856	11.6903		22.0258	19.5453	18.7203		25.6612	21.7631	12.5316		15.9123	9.11543	5.07375		14.4762	9.13508	6.87206
	mdtH	U00096.3:1124117-1125326		0.664867	0.500109	0.175585		0	0.544189	0.419653		0.650528	0.255193	0.668608		0.841833	0.443047	2.01056		0.951543	2.33018	0.602482
	rimJ	U00096.3:1125561-1126146		3.46072	6.7775	8.51733		5.98206	4.18615	3.16398		7.3452	2.63616	1.82785		7.56001	4.32672	3.77982		5.52746	1.7713	11.0304
	yceH	U00096.3:1126156-1126804		21.8125	39.369	25.7409		25.4738	17.9462	14.3568		13.0406	11.0179	8.34734		14.9352	16.7501	20.2097		17.6871	23.8347	17.2804
	yceM	U00096.3:1126805-1127729		5.07299	6.86431	5.24167		4.13836	4.63491	5.88613		2.91646	2.08578	4.33992		2.51718	3.52516	3.9991		7.42746	5.82161	6.1031
	murJ	U00096.3:1127838-1129374		4.07617	2.35644	5.12035		8.69595	5.51164	12.6774		6.57996	10.5473	9.81945		10.745	8.0598	5.40527		11.6311	7.04828	5.6303
	flgN	U00096.3:1129413-1129830		4.69202	2.07971	2.35215		0	2.58131	4.13041		7.75576	1.25376	4.25973		1.07197	2.82572	1.88712		7.36732	0.817306	8.92576
	flgM	U00096.3:1129834-1130128		10.4523	6.56486	13.6435		9.40386	2.88829	0		0	5.04939	4.46335		0	6.31496	1.9064		0	0	9.56855
	flgA	U00096.3:1130203-1130863		7.03794	1.68582	4.02816		6.03601	2.7409	4.56287		3.70663	0.545578	3.9998		1.04937	1.01779	1.24619		1.33694	1.68763	1.08026
	flgB	U00096.3:1131017-1131434		5.48338	11.8077	9.70388		12.9473	2.95224	12.7828		1.41446	1.22006	0		2.25335	0.713345	0		0	1.25805	0
	flgC	U00096.3:1131437-1131842		11.9292	8.54443	9.18113		9.80154	10.6143	12.9303		9.86525	11.6357	3.17224		2.05559	0	1.84924		1.61673	1.91423	3.87332
	flgD	U00096.3:1131853-1132549		8.01445	9.07645	7.93377		6.28476	9.33526	5.68798		7.42969	2.9974	6.92403		4.62624	7.19052	5.16677		2.92764	2.65	4.03168
	flgE	U00096.3:1132573-1133782		5.17579	4.97012	3.63298		5.97404	4.96566	5.3557		7.63142	2.29527	2.76926		2.18465	3.99145	3.34529		2.84872	1.72141	3.18792
	flgF	U00096.3:1133801-1134557		6.80044	6.24979	5.1468		5.20836	4.33347	10.8133		8.13356	7.5207	4.8842		6.24997	4.50369	6.27513		5.93874	4.68172	6.43072
	flgG	U00096.3:1134728-1135511		3.90204	2.46517	5.34089		13.1612	4.80353	6.30055		13.9196	5.05602	4.05343		5.851	3.49079	5.02584		3.31	3.59288	4.5978
	flgH	U00096.3:1135563-1136262		1.39832	3.56393	4.38488		3.8926	7.16056	4.2057		6.1197	3.20909	2.24687		4.24159	3.94659	3.62882		1.09286	2.54465	1.47929
	flgI	U00096.3:1136273-1138312		0.766306	0.603302	1.43735		2.15368	1.14703	2.16238		2.60545	3.34278	2.80714		3.08389	1.50756	1.34182		1.72978	1.09051	2.5736
	flgJ	U00096.3:1136273-1138312		1.60147	1.35108	0.295227		1.68833	2.02021	2.40472		2.04499	3.66844	4.49918		3.58902	5.61156	4.39528		2.7594	4.09051	4.63069
	flgK	U00096.3:1138377-1140021		0.74973	1.13334	1.0711		2.61658	2.21828	2.4625		7.37638	5.0285	6.06371		8.61143	6.2992	3.74613		4.11548	3.94633	3.52579
	flgL	U00096.3:1140032-1140986		1.94952	2.9812	1.76063		5.22656	1.94848	3.33188		5.42178	13.0556	22.2121		17.3405	14.8293	13.6533		13.4079	7.49511	9.07868
	rne	U00096.3:1141181-1144367		44.8643	58.9412	39.2196		50.2134	54.0443	43.2254		31.0851	28.3327	32.0389		46.1146	38.8656	35.1521		51.8032	50.6872	42.626
	yceQ	U00096.3:1144501-1144822		1.0572	2.4037	0		0	0	0		0	0	0		0	2.32749	0		1.80271	0	0
	rluC	U00096.3:1144939-1145899		20.0401	16.7365	15.47		16.112	17.9215	34.574		14.7311	10.4138	15.2592		11.9102	14.1232	11.9431		19.4599	7.73858	10.0702
	psrD	U00096.3:1146010-1146757		5207.17	2774.83	2598.39		5277.28	5061.34	4007.75		2435.98	4698.12	6023.14		4240.18	1686.49	2918.75		1352.47	603.403	591.814
	yceF	U00096.3:1146010-1146757		14.4956	10.9588	9.32895		15.9689	17.8679	8.42444		18.5542	17.3522	12.316		22.693	13.3462	7.9093		20.6252	17.4874	10.5668
	yceD	U00096.3:1146793-1147315		845.486	319.691	258.458		734.101	1100.01	1352.91		491.914	779.681	759.754		658.679	1088.86	561.69		588.919	558.809	392.336
	rpmF	U00096.3:1147366-1147540		4959.17	3157.64	3463.94		4821.16	4721.08	13932.2		13205.1	7521.18	8374.85		7339.26	7866.32	3721.81		10117.5	4313.19	6047.2
	plsX	U00096.3:1147620-1148691		119.91	88.606	98.2978		158.206	289.458	265.087		223.089	254.579	292.599		291.332	130.491	185.217		208.182	99.6607	69.0236
	fabH	U00096.3:1148758-1149712		89.8473	59.9189	67.6969		93.4633	106.748	134.911		164.387	115.302	135.002		120.683	109.836	79.1549		70.436	77.9258	65.0984
	fabD	U00096.3:1149727-1150657		179.578	95.9976	120.094		169.913	176.854	184.765		206.34	186.071	227.627		155.94	173.378	137.457		121.278	139.342	89.8367
	fabG	U00096.3:1150669-1151404		425.947	256.777	220.954		410.231	382.206	406.197		299.052	295.286	594.29		204.034	443.219	379.526		250.691	217.891	151.508
	acpP	U00096.3:1151614-1151851		10554	6676.93	7483.07		7573.47	6839.76	13678.1		7070.33	8027.81	8550.95		4224.88	8751.28	5408.46		5920.16	3922.23	5758.61
	fabF	U00096.3:1151938-1153180		147.58	99.8967	118.095		159.39	202.232	216.942		372.238	218.556	272.183		157.506	187.619	106.75		143.355	109.627	114.192
	pabC	U00096.3:1153299-1154109		7.27273	6.15477	12.5656		16.4941	13.6874	25.2258		80.6506	52.803	74.7805		101.441	45.3339	73.6194		85.2103	38.9213	38.4389
	holB	U00096.3:1154111-1156766		9.24648	7.07911	8.01142		20.2154	32.5318	19.349		58.7196	59.3175	64.063		81.9676	44.0243	32.3824		58.2239	34.6875	35.8628
	tmk	U00096.3:1154111-1156766		14.5275	10.7617	10.6386		24.4671	18.8126	36.3313		98.9437	45.5165	63.1975		79.2933	85.6724	49.5003		71.9704	35.8043	87.7248
	yceG (mltG)	U00096.3:1154111-1156766		4.86244	4.1598	6.27178		5.88177	4.36862	14.2754		19.4667	2.80399	38.7307		6.49594	37.1674	24.9793		38.8944	4.29727	20.1605
	ycfH	U00096.3:1156776-1157574		10.202	5.39008	8.62596		13.8471	18.1459	22.982		86.1438	64.4015	65.7677		93.6221	83.9897	62.3717		81.582	69.1007	67.7357
	ptsG	U00096.3:1157868-1159302		30.7486	21.0948	10.1422		18.3209	19.3519	16.4549		23.0004	35.8634	27.0801		54.4125	32.6155	25.2663		41.3839	34.7844	25.7647
	fhuE	U00096.3:1159361-1161551		1.07455	1.53174	0.0881971		0.199455	0.383235	0.729142		1.35292	0.78598	0.52039		1.00845	0.431561	1.24883		1.04265	0.430875	0.9196
	hinT	U00096.3:1161884-1162244		33.9631	76.4622	62.8202		33.6086	53.2079	58.5966		31.1726	23.0684	18.4899		20.0597	19.9577	17.4541		17.7046	11.404	16.4056
	ycfL (ldtC)	U00096.3:1162246-1162624		42.4545	78.8843	85.5409		52.2629	49.7532	45.0317		15.9568	34.4414	52.1013		21.7083	20.0979	24.1675		23.9111	22.8359	22.8084
	lpoB	U00096.3:1162637-1164084		19.4764	35.2891	29.6546		37.5068	15.9733	24.0482		10.2978	10.4501	20.3712		11.8394	14.1583	15.047		12.8514	10.232	14.0792
	thiK	U00096.3:1162637-1164084		5.30475	6.83292	3.65754		6.21572	5.68175	5.2829		8.8246	4.855	9.26841		6.72575	7.97743	4.44459		8.37022	5.72704	6.66555
	nagZ	U00096.3:1164094-1165120		9.34282	18.7539	20.2539		15.0582	20.6674	20.1368		14.0451	18.3605	30.5479		19.2353	18.7411	20.5001		22.2907	16.0413	18.5982
	ycfP	U00096.3:1165142-1165685		18.3637	53.9696	63.827		27.4699	26.4726	31.7268		33.863	22.8742	60.8068		39.368	29.8652	40.4037		40.7705	18.9612	28.7223
	ndh	U00096.3:1166084-1167389		20.663	9.85354	17.192		23.0523	25.0974	40.7088		29.1396	13.6783	14.2253		8.54246	5.28373	3.05922		2.69594	1.22652	2.01316
	ycfJ	U00096.3:1167598-1168138		0.750257	0.893367	0.54002		1.36383	2.14826	1.75876		0	0.917992	2.11242		2.08692	2.2336	4.17933		1.00186	0.28757	0.548296
	ycfQ	U00096.3:1168199-1168832		4.38358	9.73083	11.4819		7.73318	7.5775	8.04276		10.3673	3.93096	11.9606		6.11063	7.49577	6.5214		10.5392	6.00763	5.76596
	bhsA	U00096.3:1169072-1169330		7.05271	8.01748	3.98414		22.0007	41.4366	131.996		104.964	46.7712	81.8451		72.3797	54.2699	69.6561		26.5139	3.74289	7.43687
	ldtC (ycfS)	U00096.3:1169411-1170374		1.69717	1.16022	5.11115		4.9558	2.09052	4.87006		0.678499	0	1.89727		2.72868	1.94147	0.903515		2.69322	1.67666	3.83481
	mfd	U00096.3:1170517-1173964		6.30121	12.0282	13.3143		9.69531	8.24526	6.51468		8.72194	7.87143	5.91701		24.7422	20.3535	20.4323		19.3168	16.5102	18.195
	ycfT	U00096.3:1174091-1175165		0.106449	0.503119	0		0.434725	0	0.697564		0.265678	0	1.31178		1.68489	0.701097	0.776083		0.885195	0	0.0927634
	lolC	U00096.3:1175426-1178564		16.8729	12.0117	13.1975		9.2567	12.4219	13.1539		6.70533	5.13935	14.0629		5.68308	11.5368	11.239		10.561	7.01803	6.3576
	lolD	U00096.3:1175426-1178564		9.87879	7.71184	11.5305		13.045	11.1844	17.5677		9.92461	2.37371	5.89483		4.46215	11.3868	5.14001		7.05083	8.15941	11.6939
	lolE	U00096.3:1175426-1178564		20.3131	18.363	11.5481		20.0908	20.1491	22.2352		8.07212	11.7512	21.8216		8.95422	11.3868	9.0075		15.7311	10.5437	9.01258
	nagK	U00096.3:1178592-1179504		13.4206	15.2294	15.7604		10.4307	12.8598	25.346		13.096	8.27338	14.5872		9.85394	12.079	12.7898		11.0735	9.05663	10.4477
	cobB	U00096.3:1179630-1180359		19.2784	14.5764	13.2308		16.8694	17.1048	28.0112		8.16201	6.94324	4.78056		10.8096	12.936	8.36684		8.39994	10.5863	11.6405
	ycfZ	U00096.3:1180478-1181725		2.83215	1.29922	0.241315		0.720439	0.996364	0.557496		2.93565	0.35219	0		0.746927	0.473939	0		0.795022	1.00139	0.361758
	ymfA	U00096.3:1180478-1181725		0.723357	0.954663	1.51749		0.811858	3.67474	4.75814		1.88481	4.91993	1.04468		2.9483	0.410383	3.07383		1.17121	2.43995	0.726927
	potB	U00096.3:1181782-1184444		16.2283	7.03632	9.12762		23.7893	19.6755	41.6695		21.8233	25.1081	32.8623		26.7653	19.2546	17.195		17.4642	15.3306	13.4587
	potC	U00096.3:1181782-1184444		25.9596	11.0573	15.0135		29.7655	45.2372	58.7739		41.7919	39.5444	56.507		53.317	20.8014	33.0617		38.8946	32.047	25.0199
	potD	U00096.3:1181782-1184444		94.7298	56.8082	42.6428		74.7795	86.0917	127.929		115.151	82.8608	116.025		118.075	126.591	113.851		125.067	84.8694	85.9064
	potA	U00096.3:1184457-1185594		34.4477	24.7691	26.8521		46.9997	75.362	82.6855		34.536	66.6284	78.7772		72.1242	47.255	49.246		50.0466	40.7407	22.3974
	pepT	U00096.3:1185843-1187070		7.46535	27.3051	30.2357		11.1849	9.20981	8.13308		7.65985	6.46464	4.07116		5.10947	8.28136	6.02697		10.1668	8.43057	5.61713
	roxA	U00096.3:1187118-1188240		16.6338	15.9816	16.555		15.9943	15.7868	18.5493		12.18	7.13867	11.2346		11.2279	12.0209	9.67733		9.28097	7.94101	8.23044
	phoP	U00096.3:1188315-1190447		20.5691	51.3823	45.7159		36.8561	24.2581	32.7196		6.22189	12.0103	16.9278		17.8102	16.8509	25.4314		21.7558	14.3005	12.7219
	phoQ	U00096.3:1188315-1190447		10.3958	10.4712	10.6453		10.8573	11.7118	11.3059		7.29743	5.0289	4.34771		9.36559	5.85275	7.41423		5.23311	6.8597	7.6337
	purB	U00096.3:1190615-1191986		24.8266	20.3491	13.736		25.0818	27.6227	42.8682		45.9692	38.5152	40.5818		35.7301	24.3726	18.5204		25.3773	18.8637	14.6785
	hflD	U00096.3:1191989-1192631		13.6524	17.8765	8.34976		22.8617	16.5251	30.2143		18.8969	18.3839	26.1478		16.8365	16.938	18.0708		23.2595	9.29133	17.0253
	mnmA	U00096.3:1192666-1193773		34.9834	22.7756	23.9317		33.5418	30.2423	50.122		58.4675	28.7678	43.2756		32.1661	40.5306	21.4362		28.7727	19.3874	26.8753
	nudJ	U00096.3:1193826-1194288		11.9327	8.40901	8.62629		11.5942	11.5079	19.4854		10.1534	13.398	7.66562		11.3606	7.97945	2.08066		11.9896	10.5715	4.85643
	rluE	U00096.3:1194297-1194951		11.1019	8.42769	8.08208		11.1667	14.5433	17.1716		24.7439	13.2042	4.53851		11.9123	10.8511	19.6167		14.4747	11.3215	9.8274
	icd	U00096.3:1195122-1196373		195.081	266.04	186.94		230.698	182.131	182.19		380.373	198.811	167.417		272.734	125.276	118.899		220.435	146.187	179.815
	ymfD	U00096.3:1196866-1197532		7.03213	6.61997	5.03222		2.75899	6.45518	6.40865		3.72084	1.96205	4.66296		0.385592	0.647208	0.272575		9.45433	8.63989	3.51518
	ymfE	U00096.3:1197532-1198237		6.03945	6.7166	10.0281		5.05063	3.66101	5.01545		0.365961	0.995594	7.38649		5.30101	1.69575	18.6965		8.88905	7.95912	3.08773
	lit	U00096.3:1198694-1199588		5.81459	5.31871	3.2158		3.34899	4.77801	4.91775		4.1873	2.09096	3.11229		2.73721	3.03302	1.07003		0.525888	1.34832	0.919726
	intE	U00096.3:1199678-1201032		1.82652	1.13383	0.455685		1.91407	1.81941	2.14689		1.79641	3.38789	3.14862		2.93701	3.83428	1.64987		5.02544	3.26468	2.94959
	xisE	U00096.3:1199678-1201032		0	3.04069	0		0	0	0		0	4.41842	0		2.35191	1.6261	5.55467		11.0039	0	1.39002
	ymfI	U00096.3:1201496-1202084		17.0648	54.3777	45.8961		30.3602	23.79	43.6087		29.7326	26.9076	6.27796		20.63	5.62488	14.8494		19.6986	18.77	14.7413
	ymfJ	U00096.3:1201496-1202084		1.78558	3.23955	0		4.72361	1.30033	0		2.45037	0	0		11.7312	1.00525	0		4.79243	0.647505	1.47212
	cohE	U00096.3:1202258-1202933		28.4749	32.1971	9.12877		20.855	27.8095	29.0539		88.9098	45.6066	25.7894		75.2079	37.1691	40.7515		61.9526	48.766	47.8658
	croE	U00096.3:1203023-1203224		0	0	0		0	0	0		0	0	0		6.58854	5.57264	8.53775		7.94287	10.133	4.20927
	ymfL	U00096.3:1203267-1204160		1.06303	0.181013	0		0	1.10185	0.559623		0	4.02029	0		0.999435	1.27837	1.25356		0.945519	2.02479	0.746547
	ymfM	U00096.3:1203267-1204160		1.85206	0.679669	0		0	4.07581	6.3514		0	1.37224	6.74743		6.46208	6.00545	5.55648		9.89637	4.59511	2.04874
	oweE	U00096.3:1204169-1204403		0	0	4.42668		0	0	0		0	0	0		0	4.89088	6.15142		0	0	1.72529
	aaaE	U00096.3:1204403-1205537		0.109782	0.0739607	0.373351		0	0.197904	0		1.64743	1.32047	1.42766		1.54614	0.556289	0.487362		1.30627	1.32512	0.789106
	beeE	U00096.3:1205548-1206142		0	0	0		0	1.83342	2.80492		5.43827	1.63622	2.00148		2.34785	0.739528	3.86237		7.53764	1.99815	1.26195
	ymfR	U00096.3:1205548-1206142		0	0	0		0	0	0		0	0	0		0	0	7.75303		0	4.4873	4.66212
	jayE	U00096.3:1206142-1207497		0.241753	0	0.341788		0	1.07403	0.862746		1.47885	0.760422	0		1.47272	2.27208	0.529642		1.04869	1.70001	1.56628
	ymfQ	U00096.3:1206142-1207497		0	0	0		0	0	0.724965		0	1.94766	3.848		1.65396	0.327978	0.706456		0	1.2703	0.266831
	stfP	U00096.3:1207500-1208130		0.200173	0.45921	0		1.0208	0.380135	0		1.00773	2.44641	3.09511		2.73781	2.53154	3.76673		5.1845	1.75079	2.63091
	stfE	U00096.3:1208131-1209619		0	0.222399	0		0.538462	0.281759	0.596447		7.35929	3.70176	4.68648		3.96742	5.94984	5.06886		2.40119	1.38728	0.796703
	tfaE	U00096.3:1208131-1209619		0.294608	1.1746	2.85359		0	1.07396	0		0.580355	2.4759	1.99896		2.05565	3.21864	2.34449		6.243	3.62284	0.904089
	tfaP	U00096.3:1208131-1209619		1.37617	0.338803	0		0	0.458857	0.909661		5.60893	0	4.82766		6.44905	2.94371	5.76703		4.1375	5.10824	1.90497
	pinE	U00096.3:1209684-1210239		0.241295	0.143062	0		1.23082	1.325	0		8.01288	2.74346	10.0201		4.59794	9.23275	19.2254		11.5953	5.8331	6.5332
	mcrA	U00096.3:1210345-1211179		5.71959	10.2363	6.15893		2.83469	3.02211	6.62033		6.21335	7.53029	9.80636		13.9405	6.41723	13.6649		14.6009	9.99628	7.38288
	icdC	U00096.3:1211412-1211577		12.8757	4.53624	0		0	0	0		50.3395	17.3492	0		14.9701	17.3869	84.0259		57.2885	4.74909	6.8788
	iraM	U00096.3:1211679-1212003		2.68243	8.91564	3.58085		9.33567	9.32538	2.51186		2.48877	2.48239	0		0	0	0		6.95933	2.92644	1.52027
	ycgX	U00096.3:1212702-1213107		3.57329	1.5659	2.66164		7.95866	3.73598	2.17449		0	1.17273	0		1.04038	0.783622	0.932653		4.43164	1.03598	1.55754
	bluR	U00096.3:1213327-1214059		6.78643	9.82946	5.27013		9.46146	7.01987	8.15532		9.54122	3.78529	12.5326		11.1958	11.31	7.21229		7.30767	5.46182	4.88843
	bluF	U00096.3:1214263-1215475		1.218	0.968871	1.27732		0.346934	1.12974	0.605831		0	0.462975	0.27139		3.83701	1.85235	3.72229		3.94126	1.25081	1.72242
	ycgZ	U00096.3:1215788-1216025		9.65478	7.33254	0		0	6.28754	3.2102		0	0	12.649		3.69993	6.6026	3.09061		13.9249	3.67474	1.97233
	ymgA	U00096.3:1216067-1216340		1.12715	12.0408	3.38614		0	6.98773	2.0411		2.21198	0	0		0	0	2.22576		7.72933	0.963562	5.86646
	ariR	U00096.3:1216368-1216635		5.92097	8.09341	10.9528		0	1.82335	3.98369		3.27392	0	9.32819		6.50813	0	8.01285		1.51452	0.805687	0.828296
	ymgC	U00096.3:1216747-1216996		5.61738	11.4128	0		0	0	4.13384		0	8.27344	0		0	0	7.22662		3.10129	3.01517	2.42203
	ycgG	U00096.3:1217327-1218851		0.20328	0.176586	0.0973328		0.701773	0.266618	0		0	0.172736	0.433642		0.148523	0.0788519	0.0929887		0.835796	1.09096	0.443302
	ymgF	U00096.3:1218982-1219201		14.6737	40.6499	5.61812		0	13.7169	18.6458		12.9078	36.7281	0		11.1168	15.5081	16.4635		20.4706	5.95928	5.85455
	ycgH	U00096.3:1219600-1222248		0.796505	0.798018	0.862304		1.63329	1.90993	2.00255		8.49308	6.54034	9.10043		11.3705	7.58838	8.76701		11.1451	6.28501	5.96502
	ymgD	U00096.3:1222304-1222634		14.4334	3.19347	12.8092		1.94417	7.08044	17.1738		22.6845	41.7516	24.0565		21.6349	31.1319	35.2231		38.123	36.4257	34.774
	ymgG	U00096.3:1222643-1222988		1.23164	2.75502	1.15636		2.92259	0.762712	3.41936		39.325	23.7153	10.3346		29.3702	38.877	23.6159		25.7875	12.9015	19.164
	ymgI	U00096.3:1222989-1223163		16.6459	13.5856	17.6919		0	5.10208	0		0	24.5921	15.683		14.6305	5.08662	24.2067		16.9851	28.8151	3.73654
	ymgJ	U00096.3:1223263-1223449		0	0	0		0	0	0		0	12.8185	0		0	0	0		0	0	0
	ycgI	U00096.3:1223563-1223907		2.6289	4.6689	1.12693		0	0.894757	1.4188		5.84367	8.29127	10.2018		8.03169	10.7838	8.83457		14.2101	4.09714	3.21407
	minE	U00096.3:1224278-1224545		175.966	389.514	325.374		184.637	198.638	243.098		194.914	501.787	645.079		429.955	441.833	729.875		510.659	513.859	331.014
	minD	U00096.3:1224548-1225361		32.4187	53.0188	56.9872		43.7606	35.1643	35.4659		132.383	149.641	105.656		167.673	167.724	137.034		137.339	125.24	136.312
	minC	U00096.3:1225384-1226080		50.0667	41.0933	52.0788		28.9643	31.6598	35.8341		46.7877	42.1424	60.8229		58.5326	83.747	67.1673		74.5809	56.1416	75.7943
	ycgJ	U00096.3:1226599-1226968		7.05944	15.3877	25.6176		31.0038	23.8106	26.8184		22.9243	8.97394	16.8808		12.7235	10.8069	5.83704		16.6602	7.70494	13.9985
	pliG	U00096.3:1227070-1227472		7.84983	37.4521	33.3948		12.6939	7.17474	23.9485		15.9203	20.1701	8.02375		19.7486	7.40429	13.3594		12.5054	16.9687	6.97348
	ycgL	U00096.3:1227713-1228007		62.8991	68.7702	76.9508		30.8004	46.6672	50.6826		16.2594	23.0589	20.5438		42.3885	24.3478	75.0325		28.3809	34.162	27.8575
	ycgM	U00096.3:1228078-1228738		15.6673	19.5052	21.721		15.2649	11.0518	11.4486		8.64677	2.96458	7.20169		4.35758	5.11817	12.2269		14.4913	5.78611	9.44485
	ycgN	U00096.3:1228814-1229276		14.1793	15.7647	16.1149		19.8103	15.1107	28.8071		21.8729	16.0419	9.33186		24.69	15.5089	18.0572		25.9507	11.1776	12.1851
	hlyE	U00096.3:1229482-1230394		0	0	0.798887		0.588277	0.136587	0		0.317976	0.332442	0		1.07698	0	0		0	0.367045	0.266368
	umuC	U00096.3:1230766-1232454		1.88087	0.674759	1.20068		1.0873	0.983051	0.651821		0.954406	0.908056	1.4389		0.597361	0.381283	0.964498		0.730245	1.8377	0.664099
	umuD	U00096.3:1230766-1232454		2.05101	4.54728	0.863639		3.01761	3.10041	4.1618		2.41263	1.17956	3.63936		4.85435	2.30196	1.49918		4.10599	5.93319	2.74372
	dsbB	U00096.3:1232499-1233030		10.8946	9.97894	6.74284		14.0514	19.5123	21.7015		16.9249	11.9562	13.0538		12.8809	10.2272	9.58892		10.2952	4.81299	6.77266
	nhaB	U00096.3:1233175-1234717		22.8417	26.2626	22.1833		24.496	27.0125	23.8067		22.6085	20.7298	14.6814		21.7432	15.756	9.46753		11.0271	10.1237	9.9842
	fadR	U00096.3:1234937-1235657		24.9806	16.6006	12.1204		12.2528	8.52927	18.5543		8.88606	1.55034	9.11131		5.51428	5.84517	5.05035		10.1847	5.51126	8.88809
	ycgB	U00096.3:1235708-1237241		0.652668	1.53154	0.237632		0.326885	0.705106	0.369246		0.568231	0.593917	0		0.850981	0.608391	0.823102		1.8509	0.211385	0.480015
	dadA	U00096.3:1237570-1238869		53.5511	89.1923	50.5736		31.5011	17.7714	17.3007		17.1803	15.7721	11.6705		15.7059	20.5359	20.0674		53.5641	71.8593	84.8511
	dadX	U00096.3:1238878-1239949		38.1158	85.2389	59.7822		23.6801	16.7456	14.4598		14.788	8.0519	9.6127		9.75536	15.3127	18.1443		41.8312	44.53	67.282
	cvrA	U00096.3:1240334-1242071		3.61131	4.10513	5.91994		5.38582	2.50146	2.25428		3.31954	2.70231	3.68926		3.62699	2.60576	2.4057		4.15402	2.65755	2.22147
	ldcA	U00096.3:1242165-1243080		4.33684	6.4808	6.92576		5.02417	3.09178	6.89824		7.46365	5.77646	3.17213		3.66272	3.86553	1.22488		3.22828	2.00206	3.89831
	emtA	U00096.3:1243179-1243791		18.0192	9.59943	12.6335		7.32838	10.3829	21.3654		15.4909	7.60951	6.06205		7.26008	12.8939	19.3269		5.34964	5.20172	7.34451
	ycgR	U00096.3:1243792-1244527		0.575205	0.258385	0.349292		0	0.18544	0.373953		0	0	0		0	0	0.303537		1.29791	0.278853	0.964918
	ymgE	U00096.3:1244727-1244982		0	4.79659	3.13302		0	0	0		0	0	0		4.14035	3.57726	1.87574		0	0.863896	0
	ycgY	U00096.3:1245159-1245600		0	0.644476	0		0	0.809344	0		0.944484	0	0		0	0	0		3.85257	2.15632	1.02411
	treA	U00096.3:1245678-1247376		1.68037	1.63958	1.25713		0.860299	1.5734	2.17601		4.86811	2.57232	4.28297		4.71822	2.8518	3.8745		3.88265	4.11876	3.34754
	dhaM	U00096.3:1247695-1249114		38.6527	68.0064	36.4082		19.0104	14.1582	13.8701		10.7929	13.2536	10.5181		11.9281	12.9925	11.4654		22.5422	20.0946	26.1238
	dhaL	U00096.3:1249124-1249757		56.1197	58.1789	53.6532		14.7549	8.39018	24.8458		17.1847	7.23778	12.6741		9.26955	4.49038	6.10332		23.4489	37.2607	20.1877
	dhaK	U00096.3:1249767-1250838		35.7604	42.4735	28.7691		10.9421	7.3672	13.401		5.41196	1.43796	4.33368		4.15054	6.89647	8.49581		19.197	14.4893	17.861
	dhaR	U00096.3:1251065-1252985		2.47258	5.82229	3.94415		2.51875	3.65166	4.5409		6.63889	5.11014	9.01995		7.26222	7.4971	8.12077		9.63283	6.97801	5.31291
	ycgV	U00096.3:1253084-1255952		1.08056	0.951061	0.828366		1.01814	0.911133	1.76192		2.53109	2.6166	2.80275		1.9079	3.04	2.38975		2.46496	1.64849	2.44629
	ychF	U00096.3:1256720-1257812		38.435	26.7594	22.1538		34.121	31.9681	54.2922		77.4297	46.3914	49.7467		77.2005	68.2254	45.8482		44.0441	31.0291	40.0814
	pth	U00096.3:1257928-1258513		35.0019	14.8256	11.8705		25.3244	32.414	27.5539		18.3824	40.1056	47.9396		76.3526	38.3041	33.9399		29.4811	42.9396	14.505
	ychH	U00096.3:1258790-1259069		55.4404	78.8884	125.67		27.497	21.7296	58.3247		159.148	97.1037	263.483		165.536	88.895	215.801		156.401	111.749	68.576
	dauA	U00096.3:1259123-1260803		3.8095	1.8317	2.1701		6.599	7.22978	9.26289		7.91261	7.59189	5.09137		5.55677	4.33948	2.88626		4.46136	4.53528	2.75973
	prs	U00096.3:1260927-1261875		106.852	36.8487	52.6583		89.1059	156.524	132.954		82.7566	59.1266	65.9085		64.0251	79.8752	56.0637		48.676	60.5496	36.3803
	ispE	U00096.3:1262025-1263500		154.298	55.7981	35.6073		85.9138	70.6073	50.5001		32.034	60.0095	46.0805		32.3074	39.5047	14.2722		22.2205	27.1873	17.3217
	lolB	U00096.3:1262025-1263500		6.52676	14.2876	14.7916		7.60177	10.2498	20.1798		9.56841	5.60106	10.3839		5.86729	6.87444	3.59186		16.6402	6.55101	7.91814
	hemA	U00096.3:1263713-1264970		7.58759	7.36844	6.09756		7.42037	8.41039	6.46017		6.02737	10.1174	7.27371		5.93573	7.40565	7.23188		5.72362	6.51276	6.92384
	prfA	U00096.3:1265011-1267316		14.8228	12.3666	12.536		16.0488	15.1772	17.7851		17.4098	14.4821	11.7205		20.1158	17.7604	11.0116		16.6861	14.5311	14.7234
	prmC	U00096.3:1265011-1267316		10.757	5.20029	4.72213		10.474	14.3216	11.1304		9.34655	5.98758	11.4316		10.1558	5.7583	4.19059		8.17901	6.05551	6.31528
	ychQ	U00096.3:1265011-1267316		4.80874	7.53902	5.03366		8.61816	13.1716	12.0406		25.2321	20.5477	12.1314		17.1531	7.26533	16.0327		9.76788	11.1206	5.64023
	ychA	U00096.3:1267319-1268129		19.4971	18.6707	18.4955		19.2879	32.1626	17.9971		18.0071	15.7224	34.3246		18.6694	12.1055	15.1238		11.8651	16.4205	5.55044
	kdsA	U00096.3:1268164-1269019		39.5354	39.2944	34.2449		42.2299	51.1078	39.3953		32.7016	36.103	34.2435		20.2453	31.3651	22.4827		22.4883	23.7354	18.4494
	ldrA	U00096.3:1269167-1269275		0	0	0		0	35.0344	88.0951		76.7281	55.5023	0		64.6011	86.7438	128.084		99.6212	75.5955	178.228
	rdlA	U00096.3:1269322-1269389		2993.14	1393.56	1932.62		3080.06	1801.39	2200.87		0	0	2244.77		427.546	225.978	898.873		1186.06	331.974	1691.5
	ldrB	U00096.3:1269702-1269810		0	0	0		0	0	0		0	0	0		0	170.611	0		162.877	73.9465	205.429
	rdlB	U00096.3:1269857-1269923		4263.77	2747.55	11590.4		1523.51	5986.39	4925.58		387.837	906.5	2808.09		1056.77	4179.1	2647.08		1055.54	1123.04	2309.28
	ldrC	U00096.3:1270237-1270345		0	0	0		0	39.5202	87.2447		69.7293	63.018	0		64.5177	96.7288	129.034		107.293	101.532	190.89
	rdlC	U00096.3:1270392-1270460		2954.4	3865.33	14128.5		1666.96	6249.61	3085.43		0	471.702	2194.78		1920.97	2694.22	3920		685.587	1475.53	1998.2
	chaA	U00096.3:1270748-1271849		22.4162	28.0622	24.0718		36.5369	37.6918	40.0563		16.3609	18.4908	26.3008		31.488	21.8154	25.2514		36.1352	26.4847	17.6414
	chaB	U00096.3:1272118-1272349		20.3682	5.08379	14.7986		0	10.9787	18.5561		72.933	19.4987	68.5115		7.95096	27.0777	26.7567		55.2057	24.0992	45.5904
	chaC	U00096.3:1272506-1273202		2.27125	2.22652	3.04692		0.729073	2.97985	3.41723		4.0524	3.92988	7.61445		4.44494	4.47971	6.30826		7.78757	4.72442	2.88007
	ychN	U00096.3:1273245-1273599		29.6535	13.7994	19.5517		34.8445	52.3133	32.9739		35.8259	37.5348	39.0141		67.4529	50.0739	24.261		46.6421	35.9925	57.2991
	ychO	U00096.3:1273783-1275178		0.810757	2.14979	1.99278		0.682081	0.811465	3.4674		1.13103	0.778902	1.84492		1.50037	1.74034	0.966806		3.59663	1.20212	2.4204
	narL	U00096.3:1275178-1277618		17.4512	29.334	16.4389		17.2409	27.327	42.8802		22.3843	32.2438	29.0878		39.0228	24.6851	20.1268		24.8065	14.8121	22.0021
	narX	U00096.3:1275178-1277618		5.81621	4.56729	3.98064		7.17401	7.39605	5.43069		3.82958	4.44624	7.50264		6.06971	5.99654	6.32015		3.14839	5.25365	2.57853
	narK	U00096.3:1277956-1279348		0.928677	7.70444	6.18701		0.545166	0.914646	1.46477		0.373267	1.10068	0.72075		0.414777	0.938148	0.65333		0.781263	0.750222	0.588186
	narG	U00096.3:1279863-1286526		1.41218	12.73	8.67933		1.91844	2.45824	1.03255		0.819129	1.02206	1.4221		0.961974	1.54321	0.638199		0.744852	1.38331	0.779289
	narH	U00096.3:1279863-1286526		1.20411	6.358	2.53945		1.48018	4.52547	2.51939		0.837813	1.37854	1.69124		1.80614	1.81408	0.444659		2.33042	1.73246	0.918692
	narI	U00096.3:1279863-1286526		1.86975	12.1182	10.8643		5.08982	10.1487	9.72139		2.4031	3.30449	3.18328		2.9338	1.99648	1.92827		3.31386	1.62969	0.887788
	narJ	U00096.3:1279863-1286526		1.37432	3.73739	5.18385		3.10994	4.20742	2.30809		0.958045	2.81784	1.16245		0.821855	0.877115	2.85766		1.53383	0.909016	1.12571
	rttR	U00096.3:1287065-1287236		1359.83	2920.45	2398.58		1875.05	2448.86	4276.42		16144.8	9931.53	8328.68		9888.99	2632.94	7557.08		3798.36	4515.75	2571.81
	tpr	U00096.3:1287065-1287236		0	0	0		0	0	0		0	0	0		0	0	0		0	0	0
	tyrV	U00096.3:1287243-1287328		159603	63180.3	75713.8		149881	195673	459481		1102220	303134	202939		464384	199755	341844		187367	173984	371367
	tyrT	U00096.3:1287537-1287622		143168	63417.4	86465.5		131613	178299	490243		993725	263742	216770		444431	202353	344435		184888	162430	363101
	purU	U00096.3:1287781-1288624		32.0813	32.7333	33.5009		36.8027	44.9138	45.1625		58.5855	46.5039	58.6675		56.9596	42.1053	45.627		66.9347	42.2664	39.2296
	ychJ	U00096.3:1288673-1289132		15.6879	12.9526	16.9033		22.7033	27.8617	19.17		18.5216	12.4357	8.04114		21.2575	10.0761	19.7623		16.3691	12.3766	4.58418
	rssA	U00096.3:1289244-1290150		4.73786	9.4201	4.43872		7.33494	4.12673	8.06334		1.40276	3.77893	5.98888		3.18396	4.17993	2.22966		6.55435	6.63685	4.0863
	rssB	U00096.3:1290241-1291255		6.45547	8.27837	6.41494		11.5122	10.0421	8.37324		11.3654	9.73679	9.44745		7.67645	13.2689	12.5197		14.6789	10.7782	4.6832
	galU	U00096.3:1291456-1292365		64.0753	65.4069	54.4862		69.9058	59.296	106.663		60.46	71.6876	78.5913		75.9814	63.1748	61.4225		54.2424	51.1657	37.7259
	hns	U00096.3:1292508-1292922		783.376	757.14	693.275		613.898	731.603	838.179		333.841	362.951	530.779		397.25	406.509	680.987		693.823	636.199	515.354
	tdk	U00096.3:1293526-1294144		20.053	16.1762	16.8717		24.5463	31.2816	39.1427		8.57579	14.2681	13.9327		19.6039	8.25591	16.078		12.1073	13.4051	7.15389
	insZ	U00096.3:1294425-1295322		0.324884	0.99469	0.480215		1.24853	0.478925	2.0229		0.621333	0.203048	2.12015		0.752203	0.462612	0.126573		0.650065	0.252726	0.0786989
	adhE	U00096.3:1295445-1298121		34.9606	105.613	88.2477		72.4799	58.6184	48.8026		23.7065	13.7189	16.1705		13.5469	9.93067	10.5		16.8906	14.8177	10.8782
	ychE	U00096.3:1298597-1299245		6.78426	7.96708	5.93098		4.22121	5.98312	9.8362		13.8227	3.31211	2.79546		7.62301	6.94039	5.79246		9.76961	6.46611	5.71721
	oppA	U00096.3:1301181-1302813		80.3712	124.514	101.725		124.786	128.599	167.183		180.792	109.55	161.564		256.311	225.486	190.274		278.766	174.251	222.38
	oppB	U00096.3:1302898-1303819		21.03	22.8857	24.0334		32.3732	53.1953	46.946		59.9137	60.0061	48.474		124.696	43.7284	53.8296		58.2289	94.8455	49.8884
	oppC	U00096.3:1303833-1304742		40.947	31.4136	34.4348		62.8659	74.0529	83.0618		69.8014	63.8303	80.0679		127.982	84.2089	102.717		118.571	88.0609	76.1828
	oppD	U00096.3:1304753-1306768		39.7881	30.9398	47.597		64.1756	47.3793	85.2624		159.731	65.7404	99.2599		131.066	89.887	102.376		107.012	95.892	80.2689
	oppF	U00096.3:1304753-1306768		52.743	52.6083	60.9763		86.425	89.876	145.475		126.366	93.0131	128.277		195.617	140.957	152.36		190.461	158.977	122.313
	yciU	U00096.3:1306820-1307150		28.7097	46.2499	24.7502		26.7578	37.0501	21.0053		17.9783	14.9498	26.385		10.2606	15.6792	10.0691		24.8901	20.6288	14.8302
	clsA	U00096.3:1307184-1308645		10.3128	15.6831	11.9331		7.85241	8.40516	8.73666		8.59682	7.07343	3.69623		10.7692	6.01979	6.66811		8.73071	8.01956	7.61293
	yciY	U00096.3:1308787-1308961		172.008	52.5088	76.3756		93.0253	78.7561	104.562		309.423	75.8209	63.6407		68.8145	153.232	205.421		140.341	54.7287	131.787
	kch	U00096.3:1309015-1310269		2.91256	5.214	2.56967		3.49074	2.02701	1.77233		9.62172	2.53346	2.48304		5.11805	4.30658	4.5465		2.94884	4.4016	4.57069
	yciI	U00096.3:1310568-1310865		36.9431	72.3769	33.9067		31.9203	23.0192	19.959		10.821	9.81639	5.46021		6.06223	7.20593	6.91087		17.7198	17.5202	7.93835
	tonB	U00096.3:1311088-1311808		36.8011	42.5153	24.4727		25.2288	18.1512	33.9338		23.5337	13.4222	23.0441		19.7659	10.5155	12.7873		16.7927	6.84668	9.0587
	yciA	U00096.3:1311847-1312246		72.6647	35.8255	49.8277		117.748	102.302	88.0247		90.0172	53.663	72.6272		47.0589	60.7922	77.7233		96.7387	58.5018	48.0077
	yciB	U00096.3:1312350-1312890		15.598	17.8202	10.2535		14.4924	17.1793	14.8304		16.955	17.8009	24.8369		22.9115	14.0809	11.2839		19.6889	18.2303	10.7109
	yciC	U00096.3:1312919-1313663		27.3484	17.7302	24.4451		23.8777	28.2954	27.1749		19.1014	14.4622	24.1851		20.2112	15.5204	26.1518		18.6243	16.2823	11.0513
	ompW	U00096.3:1314019-1314658		4.7639	39.3774	22.6669		4.74298	9.37622	10.3308		0.992619	2.66838	3.77711		0.821599	1.06267	1.16397		3.39529	1.27214	2.77876
	yciE	U00096.3:1314717-1315224		0.715174	1.3592	2.88146		0.622218	1.56086	0.64073		0	0.552168	1.0535		0.551068	0.998108	0		2.11084	1.20877	0.79697
	yciF	U00096.3:1315269-1315770		0.372193	0.490127	0		1.37725	0.636057	0		3.26636	0	0		0.71034	0.832066	1.44367		0	1.7495	0
	yciG	U00096.3:1315855-1316035		0	0	0		0	3.55769	0		0	0	0		0	5.5136	0		0	0	0
	trpA	U00096.3:1316415-1318415		5.29361	7.14215	8.67475		9.20499	7.94266	5.12286		3.95776	3.06242	7.67923		4.41681	5.33844	7.36258		6.97102	9.38025	8.40946
	trpB	U00096.3:1316415-1318415		1.88515	4.57688	4.94548		4.85439	4.56949	3.0948		3.46498	3.41734	1.93293		6.16008	3.87345	5.02938		5.36317	3.28959	5.59923
	trpC	U00096.3:1318426-1319788		1.80858	2.78217	2.97865		1.3899	0.642541	1.1609		2.04308	1.10377	2.27135		2.55986	2.38095	1.77247		2.09517	1.40581	3.11198
	trpD	U00096.3:1319788-1322946		0.94451	0.654688	0.821694		0.591498	0.281143	0		2.54021	0.872697	1.20943		0.643821	0.545297	0.637142		0.370466	0.491155	0.644435
	trpE	U00096.3:1319788-1322946		0.39933	0.344831	0.1911		0.408993	0.643487	0.14599		0.354703	0.343383	1.40756		0.738101	0.217296	0.180159		0.53784	0.455938	0.0615091
	trpL	U00096.3:1323037-1323082		0	0	0		0	0	0		0	0	0		0	0	0		0	0	0
	yciO	U00096.3:1323219-1324718		6.01388	7.98669	4.86306		7.45658	8.13364	12.363		9.33869	4.15724	10.1263		5.45076	12.6885	6.60182		10.2099	5.15775	6.65731
	yciV	U00096.3:1323219-1324718		10.0657	10.7064	12.786		13.4521	11.5728	10.1641		12.2566	4.78054	4.67611		7.74346	6.04234	6.56816		7.97101	5.4608	6.16965
	yciQ	U00096.3:1324745-1326641		1.70139	2.41806	1.92009		2.80691	3.32972	4.55687		6.24048	3.1357	3.61928		6.44097	4.06171	2.83446		3.48809	3.16204	2.51029
	rluB	U00096.3:1326851-1327727		33.4703	13.6254	13.4125		37.149	36.6711	59.4686		46.0492	24.9041	32.6497		22.66	34.3597	16.4087		21.0982	14.2009	20.2839
	btuR	U00096.3:1327766-1329112		8.97816	13.8507	5.9151		2.34565	9.67366	7.00992		4.62591	6.95302	6.06738		4.50348	4.97827	4.40249		10.4772	7.7012	10.5316
	yciK	U00096.3:1327766-1329112		10.5691	9.76057	7.01338		4.36312	3.72332	3.85317		5.95442	0.924594	7.87105		3.00383	5.82425	3.3539		9.78323	3.85563	7.24953
	sohB	U00096.3:1329331-1330381		13.0147	15.2222	24.6032		13.1899	15.2406	23.3526		13.5753	11.0289	24.7651		9.48118	13.1997	10.2339		14.2644	7.73057	10.8155
	yciN	U00096.3:1330416-1330668		37.4618	52.5387	41.6195		35.9516	15.9776	104.205		75.5867	18.8424	23.9699		40.4963	42.9063	38.1592		18.7335	23.8817	42.3231
	topA	U00096.3:1331047-1333645		24.9052	27.3026	28.9688		31.2421	30.3719	34.672		50.5929	28.9423	26.9502		61.5127	71.9542	62.0236		58.487	56.1345	52.8334
	cysB	U00096.3:1333854-1334829		14.8355	33.5476	35.2885		17.5128	10.6794	17.9802		7.75661	6.25424	11.3244		13.9304	4.63879	7.87043		8.666	7.86728	6.48989
	ymiA	U00096.3:1335123-1335288		123.705	89.9855	243.465		46.0033	74.1777	103.493		98.6623	105.139	173.74		37.4895	163.983	247.862		95.256	45.127	197.756
	yciX	U00096.3:1335290-1335458		62.7829	42.5227	105.961		57.501	40.0525	123.475		149.291	0	180.022		105.764	97.3108	322.768		122.344	73.4238	154.883
	acnA	U00096.3:1335830-1338506		3.8897	10.27	10.1174		8.55245	6.86739	6.88916		9.8342	6.62871	7.28035		6.62166	6.30138	4.87563		5.74376	7.68502	6.14161
	ribA	U00096.3:1338569-1339160		32.0613	32.5192	25.1815		26.4212	26.3718	32.8845		70.8573	36.8405	33.9304		31.7184	26.3724	40.0993		28.1572	21.3234	18.2935
	pgpB	U00096.3:1339329-1340094		3.1952	4.864	3.28171		1.65535	2.62507	6.29605		1.14697	2.59561	1.08082		1.84974	1.69997	1.61173		6.63558	1.65558	0.864445
	yciS	U00096.3:1340242-1340551		57.2813	80.0665	36.4488		74.4731	69.4488	40.3479		57.7692	61.7027	66.5375		112.925	126.065	132.665		97.5404	108.656	81.9722
	yciM	U00096.3:1340557-1341727		8.90554	13.1972	11.9285		14.4997	11.637	9.50686		5.08338	3.59268	8.63823		18.4381	25.1863	33.3381		19.8296	16.378	16.9989
	pyrF	U00096.3:1341920-1342984		14.3932	7.08255	7.43609		17.0689	14.1466	22.7405		18.8455	11.9072	27.5425		25.3148	12.6815	17.3845		14.2109	14.8261	8.18517
	yciH	U00096.3:1341920-1342984		47.984	10.5692	19.3775		38.5571	45.9603	78.9497		38.6444	16.9877	47.3094		35.0577	39.923	44.475		50.7143	28.7108	33.5687
	osmB	U00096.3:1343109-1343328		0	23.2008	6.7018		15.9951	18.8671	21.3427		25.3287	0	35.7244		18.8623	10.619	49.6824		19.8735	14.1778	19.2378
	yciT	U00096.3:1343596-1344346		20.0963	28.5174	26.5282		20.5545	21.4408	28.2128		15.4205	28.1494	18.3497		27.9265	21.1137	20.1376		42.5913	26.8539	23.2161
	yciZ	U00096.3:1344435-1344609		181.393	340.257	459.958		160.129	121.382	153.841		117.289	92.2594	396.205		173.618	95.5569	266.215		420.489	178.592	145.455
	gmr	U00096.3:1344756-1346742		1.82491	2.93387	2.81007		3.36761	2.4694	2.58419		1.70265	1.11407	2.20113		2.3508	1.29282	2.80633		2.24583	2.62977	2.15001
	ymiB	U00096.3:1346795-1346900		0	0	0		0	0	0		0	0	0		0	0	66.423		0	0	0
	rnb	U00096.3:1346977-1348912		39.4619	23.8662	20.9092		27.2603	29.8439	38.9148		24.325	14.6153	15.8929		19.8325	14.3157	13.6721		12.4715	12.3056	10.4203
	yciW	U00096.3:1348979-1350107		1.93542	1.69141	1.87996		2.60362	1.15407	5.94997		4.30861	1.29502	0.24329		4.44851	1.6972	0.295585		1.37103	1.53304	1.63943
	fabI	U00096.3:1350250-1351039		135.518	143.175	113.663		115.436	112.558	215.286		165.921	144.248	113.148		97.5908	78.6898	74.4186		76.5858	46.7713	44.8937
	ycjD	U00096.3:1351406-1351760		4.37674	2.2937	1.10473		4.8149	4.70048	9.68467		15.1921	13.1642	10.2113		4.6302	4.90042	4.81557		9.17032	2.53429	9.00931
	sapF	U00096.3:1351827-1352634		10.285	6.14934	8.31253		11.1049	14.6998	10.8303		7.49784	5.39607	7.62235		10.5014	8.05222	9.95204		12.0524	10.2644	7.58147
	sapA	U00096.3:1352635-1357110		5.68261	8.25937	6.96226		7.33214	8.0701	11.7795		12.2614	7.98401	12.2218		9.34297	9.1614	7.03595		11.5128	7.84191	8.27021
	sapB	U00096.3:1352635-1357110		5.14148	4.94274	2.50454		8.13587	8.084	6.76974		12.9562	3.48924	4.68164		5.84368	6.39689	6.04952		3.33999	5.82216	3.20984
	sapC	U00096.3:1352635-1357110		2.31164	2.20656	3.29278		7.1849	4.67202	2.30061		2.86801	2.9112	2.14456		4.5669	1.962	2.35683		3.66075	3.91781	2.55049
	sapD	U00096.3:1352635-1357110		6.83781	6.40855	7.55565		8.92546	10.5798	17.5914		9.32173	9.06897	11.8785		9.74903	7.28021	8.15517		13.4106	9.75215	9.64699
	ymjA	U00096.3:1357422-1357668		3.16034	13.8178	5.62918		0	13.5581	20.665		5.16666	4.44739	11.3616		24.1873	6.48692	7.11911		49.3871	7.4611	11.2477
	puuP	U00096.3:1357801-1359187		0.0777533	0.109567	0.25534		0.167266	0.613582	0.169164		0.210002	0.62791	0.264745		0.583337	1.38237	0.864613		0.839852	0.142083	0.980903
	puuA	U00096.3:1359489-1360908		0.84577	1.22596	0.392405		0.756131	1.18397	1.53566		1.25091	0.733744	3.3615		1.60454	3.83645	2.81099		3.2805	4.51715	3.97915
	puuD	U00096.3:1361119-1361884		2.40864	1.63558	1.0089		1.75279	0.318444	0.420721		2.24072	1.6903	0		1.53893	2.41738	2.19011		5.06971	4.55833	5.28864
	puuR	U00096.3:1361910-1362468		7.06581	6.37918	5.94927		4.03512	4.61003	13.6896		11.2799	4.02419	7.31155		11.7276	4.28918	7.36476		10.5693	7.12083	11.5158
	puuC	U00096.3:1362742-1364230		0.273161	0.525773	0		0	0.0789534	0		0.633365	0.23286	0.540672		1.37943	0.421365	0.972397		2.71698	0.78113	1.19656
	puuB	U00096.3:1364231-1365512		0.0898813	0.0590129	0.130699		0	0.164783	0		0.642938	1.27133	0.558559		1.29151	1.40475	1.21008		0.59212	1.37145	0.846503
	puuE	U00096.3:1365549-1366815		0	0	0		0	1.24129	0		0.925596	1.23728	1.23649		2.60238	2.80353	0.772565		1.98872	2.59522	1.47924
	pspF	U00096.3:1366934-1367912		3.18991	4.8323	3.35035		1.17887	0.68147	1.04646		0.949648	1.63414	0.77627		1.88753	2.31734	1.935		2.4953	1.62428	1.64956
	pspA	U00096.3:1368078-1368747		18.4662	13.33	16.0219		13.9491	21.0285	23.5278		37.1587	11.7567	17.0424		17.5609	24.0176	22.2098		44.095	47.2297	73.8468
	pspB	U00096.3:1368800-1369384		15.1601	5.78989	19.967		0	10.4328	14.972		17.9454	0	16.9053		18.3752	10.4669	3.07831		41.9961	21.2734	25.8959
	pspC	U00096.3:1368800-1369384		3.1904	7.90925	1.3673		4.9584	5.80132	12.1461		22.6482	6.35998	8.115		16.0767	9.28154	5.77949		18.0658	33.1771	26.0799
	pspD	U00096.3:1369392-1369614		6.51351	4.60993	0		15.1904	5.19955	0		17.0479	18.4992	0		10.3556	3.5172	2.98843		14.6878	27.0995	24.6817
	pspE	U00096.3:1369688-1370003		148.121	415.957	189.466		164.662	255.613	118.561		179.44	195.566	57.4278		101.139	43.4967	77.2417		129.844	150.911	109.269
	ycjM	U00096.3:1370215-1371895		1.64267	1.81598	1.55711		0.37001	0.199343	0.697906		0.156938	0.505807	0		0.397597	0.31289	0.305195		0.37232	0.55674	0.354213
	ycjN	U00096.3:1371908-1373201		0.25573	2.20766	0.37948		0.695622	0.159785	0.411258		0.229029	0.214989	0		2.10657	0.645964	0.619948		0.157259	0.443528	0.329657
	ycjO	U00096.3:1373221-1374932		0.126868	0.409106	0.27503		0.55392	0.126567	0.482029		0	0	0.637167		0	0.668264	0.313404		0.941286	0.333531	0.332202
	ycjP	U00096.3:1373221-1374932		0	2.17786	0.241845		1.87044	0.451338	0.343509		0	0.327609	0.987089		0.994919	0.162404	0.208671		2.0637	1.27157	0.242241
	ycjQ	U00096.3:1374962-1376015		0	0.223509	1.31775		0.280745	0.21702	1.10241		1.1116	1.17592	1.55111		0.974819	1.45314	1.01919		1.50578	0.91895	0.685786
	ycjR	U00096.3:1376033-1376822		0.199833	1.09971	1.09394		2.42844	0.900169	1.417		2.33362	0.963007	2.75189		0.898088	1.8135	2.36183		1.08077	1.57885	3.05465
	ycjS	U00096.3:1376831-1380807		0	0.475271	0.400586		0.439364	0.294798	1.26191		0.25599	0.677037	0.77392		1.70605	1.32802	2.2395		0.200486	0.962822	1.46194
	ycjT	U00096.3:1376831-1380807		0.288164	0.558585	0.539702		0.927122	0.280149	0.591649		1.77728	0.719715	1.6568		2.449	2.47982	0.989203		1.64962	0.760461	1.61377
	ycjU	U00096.3:1376831-1380807		0	0	0		0.932549	0.23181	0		1.24231	0.63076	0.740462		0.605947	1.13448	1.4824		0.40311	0	0.432498
	ycjV	U00096.3:1380820-1381902		0.153554	0.441082	0		0	0.265621	0.362043		1.96546	0	0.483503		0.797456	1.23036	1.93928		0.496645	0.670394	0.552139
	ompG	U00096.3:1381946-1382852		0.30524	0.106581	0.256992		0	0	0		1.8644	0	0		0.329848	0.371656	0		1.30413	1.44822	1.16786
	ycjW	U00096.3:1382962-1383961		2.64059	4.22301	5.59871		4.46173	3.80556	5.10364		2.36356	1.90882	1.86685		5.29315	4.60773	3.76711		2.10915	3.12043	1.4039
	ycjF	U00096.3:1384116-1386572		2.10589	6.02645	8.77216		6.94389	5.44831	4.16282		8.37801	3.51573	5.62242		33.4929	34.7455	21.4849		33.7753	18.5677	26.0394
	ycjX	U00096.3:1384116-1386572		3.1384	9.36983	19.2336		7.94145	5.52435	3.70623		13.0273	7.07135	8.17166		42.3865	38.0847	33.5921		31.11	26.7564	32.3574
	tyrR	U00096.3:1386719-1388261		9.57392	9.88449	8.73626		9.82394	8.36733	9.81089		8.44289	5.56898	5.66959		11.3415	14.2059	13.0988		14.5522	10.136	9.39691
	tpx	U00096.3:1388304-1388811		242.283	246.379	358.603		205.112	170.076	404.04		657.211	173.056	300.681		174.115	233.51	130.68		144.936	72.9109	135.082
	mpaA	U00096.3:1388929-1390598		6.45969	7.28783	4.18483		1.57921	4.63705	2.201		5.26449	4.49126	11.6501		10.8676	6.39713	7.97813		10.7319	9.0396	4.58311
	ycjG	U00096.3:1388929-1390598		4.79469	4.12545	4.16004		4.43151	8.74546	7.57733		33.4003	13.4973	21.8332		18.1738	28.4746	21.7832		35.3597	26.261	30.5339
	ymjC	U00096.3:1390724-1390862		34.9955	33.7903	35.5854		0	35.7036	36.0668		39.8332	107.956	117.811		211.327	67.448	203.456		168.395	74.7971	50.0027
	ycjY	U00096.3:1390867-1391853		0.472711	0.716734	0.683955		0	0.375358	1.83323		5.76096	7.21668	5.80941		6.88869	6.68302	7.28538		6.97908	5.05	4.9836
	ymjD	U00096.3:1390867-1391853		0	0	0		0	108.263	0		0	0	434.353		0	0	787.322		403.331	269.764	105.996
	pgrR	U00096.3:1391990-1392890		4.33729	2.8262	3.78194		2.59388	3.15353	2.78948		1.64783	3.40276	4.66709		3.86302	4.47675	4.83494		5.85821	5.21881	2.44815
	mppA	U00096.3:1393226-1394840		20.5734	13.8777	8.27071		7.1316	7.20995	8.81515		1.98197	5.38257	5.53789		7.87294	6.13258	6.75146		18.8236	13.1149	10.1052
	ynaI	U00096.3:1394890-1395922		5.39974	5.15642	2.67627		4.00607	3.65608	4.87715		1.63632	4.0686	4.4554		5.67915	3.16726	1.35696		3.48378	3.02148	1.90928
	ynaJ	U00096.3:1397364-1397622		143.684	156.492	150.89		78.1252	208.202	161.703		68.4868	166.377	77.4011		123.7	133.023	119.813		136.443	120.106	90.7014
	uspE	U00096.3:1397671-1398622		12.6836	29.7692	26.568		13.6065	9.50297	14.9268		22.7062	8.44835	14.9973		9.98675	10.5439	6.05706		8.85703	5.56765	12.1108
	fnr	U00096.3:1398773-1399526		103.617	61.8308	63.9643		112.609	112.238	102.304		100.809	84.8033	92.5629		82.7276	81.4299	78.7741		74.8173	47.6755	48.4194
	ogt	U00096.3:1399720-1400236		0.971502	3.84482	2.93513		0.488814	0.586409	2.89979		0.543155	0.292004	0		1.42467	3.79253	1.47167		1.8257	1.00818	3.50342
	abgT	U00096.3:1400246-1401773		0.385954	0.691733	0.437471		0.284805	0.122795	0.328532		1.00799	0.922017	0.46728		1.89972	0.95331	1.83545		1.35572	2.66742	1.05874
	abgA	U00096.3:1401809-1404565		0.288103	0.659605	0		0.183934	0.740624	0.663091		1.76027	1.18556	2.25182		1.98705	3.30387	4.83428		4.61465	5.83574	5.88061
	abgB	U00096.3:1401809-1404565		0	0.280278	0.232334		0.475653	0.46806	0.555727		5.49739	0.607449	0.482912		2.3316	2.73726	2.45485		2.84361	1.15291	3.45006
	abgR	U00096.3:1404740-1405649		5.28244	3.53052	3.82569		0.862331	2.64544	4.95664		4.37906	8.19334	5.07006		9.33397	10.9502	16.6789		40.8509	37.5165	27.4059
	mcaS	U00096.3:1405655-1405751		20001.4	8886.52	13811		36289.1	17142.1	7712.32		9318.61	12494.9	22719.4		20828	8149.99	22231.2		7338.19	14905.9	15004.5
	smrA	U00096.3:1405978-1406542		9.49204	4.58994	3.90292		5.53759	4.008	11.5957		19.0765	8.19841	9.74909		13.3843	16.4034	10.95		20.9175	4.35602	15.4176
	ydaM	U00096.3:1406562-1407795		1.2059	1.83547	2.61737		0.642703	1.94183	2.52474		0.545079	1.26967	4.16847		4.55267	3.18477	1.05196		4.10066	3.94672	2.40348
	ydaN	U00096.3:1408049-1409033		2.84422	6.56095	6.13709		5.54443	3.80762	6.14415		4.03103	2.57214	3.51729		6.41514	4.42925	6.93275		6.85405	4.59041	9.29465
	fnrS	U00096.3:1409128-1409250		98.9689	587.631	2210.38		73.7855	212.056	0		50.1169	0	0		46.9045	0	0		107.381	0	39.8321
	dbpA	U00096.3:1409510-1410884		2.78703	1.2389	2.08542		2.66517	5.33807	5.8099		8.63624	3.61001	3.3119		5.92865	2.97546	3.74356		5.51516	3.66315	4.37567
	ttcA	U00096.3:1411012-1411948		27.8453	11.4024	11.2164		25.9667	19.5653	27.5619		34.0841	21.1915	27.9422		24.0533	16.6817	21.6819		23.9676	16.9523	13.4479
	intR	U00096.3:1411999-1413235		2.45879	1.64549	2.06656		2.62539	3.60237	4.26147		2.17981	1.0895	3.01033		3.80417	4.60388	3.98614		5.04062	4.0752	3.23717
	ydaQ	U00096.3:1413236-1413452		0	0	0		0	0	0		0	0	0		0	0	0		2.88229	0	2.04367
	ralR	U00096.3:1413530-1413927		0	0	0		0	0	0		0	30.578	0		12.2124	24.6173	11.8595		32.9869	33.5673	6.41385
	rcbA	U00096.3:1413530-1413927		0	3.96183	0		0	0	13.9582		0	13.7109	38.2559		40.9657	0	29.537		24.1144	24.9893	17.2868
	recE	U00096.3:1413983-1417386		0.365253	0.139395	0.213851		0.222672	0.130148	0.25219		1.77293	0.464432	1.13268		1.36204	1.04632	0.973849		2.84724	1.39691	1.50071
	recT	U00096.3:1413983-1417386		0	0.956755	1.61818		0.347306	1.65773	0		4.44999	0.780093	1.89263		2.67951	2.85003	5.37143		4.80571	3.98873	3.21592
	racC	U00096.3:1417487-1417763		0.900259	0	1.56336		0	0	0		0	0	0		0	0	0		0	1.93926	0
	kilR	U00096.3:1417837-1418229		0	0	0		0	0	0		0	0	0		0	0	0		0	0	0
	ydaE	U00096.3:1417837-1418229		0	0	0		0	0	0		0	0	0		0	0	0		0	0	0
	sieB	U00096.3:1418670-1419311		0.241272	0.648015	0		1.0185	1.55037	1.84443		2.84261	20.6072	14.4171		19.2731	9.56627	29.6041		29.0522	26.7849	16.976
	ydaF	U00096.3:1418670-1419311		0	0	0		0	0	0		0	0	0		0	0	0		0	0	0
	ydaG	U00096.3:1419321-1419456		0	0	70.5492		0	0	0		0	0	0		0	0	0		0	0	0
	racR	U00096.3:1419764-1420241		15.5356	20.6026	31.2864		12.6939	12.7497	16.2825		5.48595	5.60572	8.59718		8.73435	9.03241	15.9152		15.1457	6.07456	11.7724
	ydaS	U00096.3:1420364-1420661		0	1.03246	0		0	0	0		0	0	0		2.73848	0	16.7478		0	0	1.35591
	ydaT	U00096.3:1420683-1421106		0.657487	0.817425	0		0	0	0		1.34089	0	0		2.04612	4.64107	3.0029		1.92826	2.12105	7.82849
	ydaU	U00096.3:1421118-1421976		0.19269	0.67805	1.05981		0.350397	0.332741	0.884217		1.35071	6.53191	3.98658		2.95644	3.89002	5.09502		7.32595	8.16396	5.34512
	ydaV	U00096.3:1421982-1423200		0.838411	0.751911	1.61829		2.69158	0.664731	2.74002		5.7768	5.70584	6.91949		10.1558	5.91493	5.06816		9.51395	10.2941	10.2097
	ydaW	U00096.3:1421982-1423200		0	0.630244	0		0	0	0.499861		0.253894	0.0394458	3.42853		0.18795	2.01641	1.73717		3.77699	0.442133	3.81717
	rzoR	U00096.3:1423200-1423644		0	0	10.3186		0	0	0.0403034		0	0	60.9353		15.8798	0	18.9091		48.3421	0	0
	rzpR	U00096.3:1423200-1423644		0	2.28272	0		1.60462	4.85279	0.842963		3.13191	7.8672	6.69593		11.3608	5.45338	9.04468		10.6891	8.18006	11.8316
	trkG	U00096.3:1423781-1425239		3.56715	3.28611	2.58007		4.01853	3.61876	4.33031		1.07374	3.36279	4.21003		3.27452	1.54528	2.74454		4.3828	3.27037	2.02091
	ydaY	U00096.3:1425376-1426082		0.368136	0.702276	0		0	0.917073	0.786851		0	0.922416	4.97251		2.91038	0	1.13902		1.67313	0.377067	2.10517
	ynaK	U00096.3:1425376-1426082		0	3.53498	2.76542		0	3.67952	3.45204		0	0	4.49955		0	0	5.7572		17.5039	3.27805	6.47243
	tmpR	U00096.3:1426453-1427386		0.169621	1.19015	0.864018		0	1.36646	1.02081		0.979592	1.20561	3.15284		1.34355	0.531847	1.43586		3.74616	2.02312	1.69609
	lomR	U00096.3:1427388-1428984		0.396749	0.312769	0.246138		0	0.381362	0.361712		0.56673	1.12212	0.771378		0.663314	1.23217	0.886883		1.02216	0.808367	0.77094
	stfR	U00096.3:1429048-1432986		0.321607	0.323446	0.323152		0.196906	0.313226	0.235628		0.415765	0.964949	1.41154		1.25757	1.07328	0.442524		1.13194	0.585879	0.55345
	tfaR	U00096.3:1429048-1432986		0.716003	0.742393	0		0.429703	0.472848	0.608862		2.56799	2.10948	1.54483		5.22556	1.74445	2.51384		1.64913	4.231	2.23308
	pinR	U00096.3:1433083-1433674		1.19436	0.555272	1.46022		2.64999	5.25099	6.07481		40.4922	32.7815	31.562		35.3464	31.6059	42.7215		31.6046	15.5705	14.8928
	ynaE	U00096.3:1433990-1434224		9.88529	0	0		4.44021	4.97265	4.6863		8.14101	2.39245	13.2913		0	2.68621	39.1122		19.9419	11.2915	6.39663
	ttcC	U00096.3:1434957-1435008		0	0	0		0	0	0		0	0	0		0	0	0		0	0	0
	uspF	U00096.3:1435184-1435619		34.903	86.5519	43.0429		9.5889	9.20113	8.12522		0	9.12402	3.27162		5.53669	5.39321	8.24281		14.4824	13.885	20.2433
	ompN	U00096.3:1435759-1436893		0.273537	0.106338	0.13494		0.155832	0.378192	0.337615		0	0.213982	0.76917		1.29273	0.37483	1.18037		0.383747	1.01672	0.601574
	micC	U00096.3:1437120-1437229		0	0	0		0	15.5286	64.8869		0	0	0		0	21.1525	211.46		0	96.2718	0
	pfo	U00096.3:1437259-1440784		5.50764	7.05435	5.77503		5.33788	6.8307	4.67142		4.22153	3.10889	3.69061		3.10963	3.32045	1.22434		2.34244	1.29895	1.61933
	hslJ	U00096.3:1441057-1441743		10.5577	6.78507	12.7948		6.66405	19.8572	12.0943		20.6518	7.40705	10.5044		27.1348	39.3305	9.96821		41.7731	21.6221	20.6673
	ydbJ	U00096.3:1441057-1441743		13.2734	32.332	12.5917		19.0837	4.15744	12.536		6.64557	7.76493	4.68103		15.8808	9.81117	12.473		20.8873	10.1903	15.115
	ldhA	U00096.3:1441853-1442843		13.3279	24.6419	35.2464		35.8997	27.1716	24.6208		31.0215	22.2815	25.9724		86.9873	56.4621	59.4959		72.8088	59.8017	44.2955
	ydbH	U00096.3:1443050-1445872		4.27743	3.77317	2.64078		3.45994	3.44701	5.00609		3.31885	3.03391	3.6049		3.24532	2.9069	2.6186		3.63678	3.25996	3.01738
	ynbE	U00096.3:1443050-1445872		5.10315	25.4606	17.7238		8.28093	8.15622	12.5069		0	0	9.88499		0	11.2073	6.51639		14.9436	5.43005	9.64628
	ydbL	U00096.3:1445879-1446206		5.31847	8.98679	20.198		8.89736	6.7246	14.335		21.5318	6.07168	37.5962		17.2041	13.5844	13.3211		11.8685	4.19273	15.9948
	feaR	U00096.3:1446377-1447283		5.57744	3.3198	1.81717		0	1.10923	1.53191		0.300619	0.358757	0		0.590806	1.55821	1.72529		5.7481	7.44471	5.34755
	feaB	U00096.3:1447518-1449018		1.35459	1.27376	0.741456		1.45734	1.25319	1.03712		3.29759	2.19833	0.886251		5.3839	4.50471	3.15849		4.87189	2.0298	3.69028
	tynA	U00096.3:1449075-1451349		0.333683	0.615454	0.0707536		0.0930703	0.319139	0.112727		1.08791	0.399415	0.751774		0.288042	0.558636	0.532141		0.578062	0.490269	0.45932
	paaZ	U00096.3:1451596-1453642		0.131626	0.178806	0		0.50518	0.126763	0.288343		0.158902	0.480191	0		0.642574	0.379698	0.468044		1.08336	0.361703	0.741501
	paaA	U00096.3:1453926-1454856		2.22116	2.29606	0.443086		0	0	0		0.969654	1.69595	0		0.254294	0.512021	0.362039		1.44584	2.08813	4.01845
	paaB	U00096.3:1454867-1455155		2.11837	1.44626	0		3.73632	0	0		0	0	0		0	0	6.04465		1.61944	0.829971	0.972851
	paaC	U00096.3:1455163-1455910		0.84798	3.44058	1.62307		0.33928	0.723626	0		3.51876	1.57702	1.15037		1.46773	1.11015	3.28351		4.44651	2.53525	5.08002
	paaD	U00096.3:1455924-1456422		0.442995	2.32115	0.834598		0	0	0		1.08345	1.03985	1.64842		9.90023	2.78008	1.34159		1.49416	0.324415	4.14932
	paaE	U00096.3:1456429-1459052		0.376372	3.85983	3.6206		0.957315	0.453233	0.966764		1.57313	1.40649	0.395354		2.90437	3.04895	2.06144		3.00448	2.26852	1.21212
	paaF	U00096.3:1456429-1459052		0.168898	1.64581	0.866138		0	1.16089	0.362777		3.18265	0.450249	0		1.74677	0.826516	1.72675		1.71778	1.23419	1.91915
	paaG	U00096.3:1456429-1459052		1.08375	1.53511	2.10105		0.293329	0.418632	0.388704		1.60838	0.832131	2.61378		3.34185	0.778167	0.688784		2.4966	1.45046	2.42926
	paaH	U00096.3:1459053-1462098		0.079116	1.18949	0.958747		0.72839	0.59964	0		0.963255	0.69554	1.55482		1.18764	1.40312	2.03735		3.37911	1.64057	1.60647
	paaI	U00096.3:1459053-1462098		0	1.99961	0.558882		0	0	0.981937		0.776192	0	0		2.65307	0.306102	2.19972		1.04698	1.75139	2.4421
	paaJ	U00096.3:1459053-1462098		4.98593	2.78651	1.47415		2.3922	0.94771	0.800261		2.67131	2.57334	0.383117		2.68048	4.31765	3.6		6.64595	7.5701	6.74418
	paaK	U00096.3:1462124-1463438		2.74593	5.35344	3.13254		3.19363	2.17911	1.76189		4.01	6.487	6.91983		7.94592	9.99143	7.97162		11.6711	8.68086	9.76713
	paaX	U00096.3:1463538-1465061		2.85592	7.01869	8.97953		2.24684	5.18221	3.58383		14.6444	15.3069	9.36293		16.2823	8.85514	7.56508		12.2195	15.9865	8.44599
	paaY	U00096.3:1463538-1465061		15.1027	19.9706	13.7255		22.2486	26.9658	20.1872		31.6796	26.9556	42.6833		45.9194	25.6594	45.7766		27.0834	44.5209	19.8847
	ynbG	U00096.3:1465164-1465230		0	0	0		0	0	0		0	0	0		0	0	0		0	0	0
	ydbA	U00096.3:1465391-1474013		2.78945	3.7852	3.61805		2.57626	3.51928	5.63876		3.91521	3.70092	5.4086		6.20199	6.001	7.86334		9.60971	5.46848	5.40955
	ydbC	U00096.3:1474220-1475081		1.31118	2.10341	1.67968		1.11758	0.717889	2.12319		0.801562	2.4306	3.16075		0.608322	3.18456	3.45745		3.15911	0.535145	2.81983
	ydbD	U00096.3:1475143-1477450		0.329704	0.230812	0.139854		1.57881	2.09547	3.21684		12.8184	14.8375	14.9802		27.9638	20.1249	23.6652		27.7042	24.0393	17.9319
	ynbA	U00096.3:1477620-1479122		0	0.245053	0		0	0	0		1.44069	3.1701	3.56895		2.79385	2.85221	3.48753		5.21662	1.40096	3.12377
	ynbB	U00096.3:1477620-1479122		0.372153	0.170199	0		0	0.077033	0.314734		0	1.08397	0.825768		1.87153	1.00413	3.40995		3.49614	2.25575	1.16792
	ynbC	U00096.3:1479137-1480895		0.271113	0.51748	1.0328		0.351026	0.369711	0.767201		1.37231	0.315072	0.766264		1.90657	1.58056	1.42724		2.27346	2.18449	1.10926
	ynbD	U00096.3:1480908-1482201		0.812754	0.657231	0.763997		0.530483	0.29077	1.18862		2.86773	1.03999	0		3.14716	1.49845	2.92357		4.47406	2.47263	1.35018
	azoR	U00096.3:1482254-1482860		3.89986	6.83587	7.18254		11.14	7.05731	10.1715		9.80998	6.78713	4.09365		5.65971	4.30036	5.24225		2.50507	3.27364	4.09147
	hrpA	U00096.3:1483060-1486963		6.03516	6.90563	6.12268		9.64483	8.35477	11.9786		5.53086	6.20576	8.73923		11.4869	8.87951	8.04025		11.2226	10.8884	7.68813
	ydcF	U00096.3:1487234-1488035		10.8594	22.2966	13.5021		13.8151	11.0123	7.3371		16.3347	8.49971	4.90518		5.1959	7.85326	5.96028		6.58251	8.22437	7.53447
	aldA	U00096.3:1488231-1489671		91.5745	165.263	75.7139		16.4006	8.77333	8.76208		9.5341	8.67142	5.28691		13.0427	9.69843	22.6334		107.715	166.359	165.803
	gapC	U00096.3:1489712-1490713		15.4495	40.198	23.2257		22.7452	35.0014	26.2156		11.3642	14.5539	14.6502		18.8717	13.0414	16.1515		24.85	11.9709	11.7497
	cybB	U00096.3:1490901-1491432		27.7787	43.2673	43.2666		38.4766	34.1189	45.0356		65.7481	27.7254	16.3641		22.1559	16.8177	12.8755		29.0607	16.8692	20.7451
	rydC	U00096.3:1491442-1491506		2489.11	9607.64	26265.5		4557.07	10174.4	13684.6		7352.94	6656.7	20422.7		4426.69	8969.2	22586.4		8262.09	8426.81	8493.21
	ydcA	U00096.3:1491676-1491850		8.12129	8.62249	34.3443		0	0	0		0	0	0		0	14.4936	16.9766		8.66293	4.29757	2.55835
	hokB	U00096.3:1491921-1492174		9.66149	122.112	64.8855		30.7983	17.7264	136.092		76.4236	88.8471	232.958		105.189	36.1832	54.1506		90.1021	144.196	183.875
	mokB	U00096.3:1491921-1492174		0	51.4737	0		23.5501	12.9129	63.9659		35.1277	36.6389	200.743		46.0684	8.16067	95.3138		10.782	21.527	29.3537
	sokB	U00096.3:1491921-1492174		34605.6	21636.4	15131.6		45681.9	85279	32576.3		12686.3	16636.2	12663.7		25030.1	9065.41	12941		11476.8	9738.04	8557.73
	trg	U00096.3:1492469-1494110		0.682973	1.38892	0.53456		0.572657	0.435621	0.869915		0.713374	0.561506	0.802411		0.479652	1.19197	2.69619		1.44102	0.937848	1.07968
	ydcI	U00096.3:1494147-1495071		25.9583	12.4615	4.86915		7.2937	9.01343	14.6248		39.7752	30.0933	33.2339		44.0779	40.9818	37.2402		81.659	57.65	57.0666
	ydcJ	U00096.3:1495287-1496631		0.911139	0.405313	0.71013		0.181171	0.346672	0.208506		0.230382	0.841368	1.50209		0.80914	0.561431	0.133505		1.23823	0.620075	1.66714
	opgD	U00096.3:1496855-1498511		7.05888	8.95114	8.5036		7.72346	5.89327	6.95708		15.8277	5.68744	16.0565		11.4826	13.0437	15.6406		15.2453	10.8888	13.0372
	ydcH	U00096.3:1498650-1498875		3.60347	37.6528	16.9664		7.47906	0	14.6292		0	41.8829	7.89361		6.46532	14.0442	12.9494		16.1771	7.10222	23.1875
	rimL	U00096.3:1498937-1500449		8.99317	14.4478	6.52901		6.24253	10.4632	14.0475		5.50936	15.5551	10.6145		2.80923	5.02384	9.05088		22.0351	12.7833	2.69447
	ydcK	U00096.3:1498937-1500449		0.748019	1.59902	2.29238		0.850864	0.925983	2.18403		1.45481	1.49834	0.50951		1.65696	1.26146	3.01104		2.1004	1.4727	1.35884
	tehA	U00096.3:1500572-1502155		1.15008	3.47658	4.73466		1.75159	1.76046	1.7383		5.49047	1.02974	2.6073		2.14976	1.35819	3.35465		2.67813	1.18713	1.99391
	tehB	U00096.3:1500572-1502155		12.3652	12.7293	16.865		12.2032	12.8428	27.5404		9.03933	4.17163	13.723		9.69539	12.6519	11.6229		10.9147	3.53982	5.78035
	ydcL	U00096.3:1502456-1503125		15.2376	23.84	20.0239		16.6023	14.7323	14.1184		15.2166	11.6757	8.62512		9.39022	5.5044	8.31054		13.3271	14.7206	8.98004
	insP	U00096.3:1503217-1503649		0	0	0.657592		0	0	0		0.904962	0.952759	0		0	1.35662	0		0.695516	0.664245	0.329394
	insQ	U00096.3:1503716-1504865		2.62791	2.48561	1.56005		3.55245	3.14617	7.47794		8.61427	2.08365	3.37449		2.78757	2.65369	1.75517		4.46878	3.82149	5.39309
	ydcO	U00096.3:1504904-1506080		0.690089	1.05888	0.181685		0.401667	0.341575	0.474553		0.287685	1.52406	1.07116		0.442543	0.120963	0.299706		1.48705	0.520502	1.44549
	ydcN	U00096.3:1506171-1506708		1.02748	1.81415	1.89626		4.4966	3.11408	6.63827		1.92867	2.26547	3.12237		6.10097	2.55228	2.83846		4.04853	1.87546	1.98791
	ydcP	U00096.3:1506780-1508742		7.94084	5.91126	6.00141		9.27855	13.1203	12.3155		7.9947	7.22211	11.8809		11.0188	7.71785	7.02597		9.79128	6.58313	5.11137
	yncJ	U00096.3:1508833-1509064		1.28994	10.1618	12.4361		11.0968	3.35495	9.41258		32.0043	2.93411	26.8709		31.0452	20.0903	18.7111		46.3431	11.4614	14.2369
	hicA	U00096.3:1509285-1509462		37.9825	4.91318	25.5599		27.2758	11.2069	18.0001		0	0	0		7.88466	18.5852	0		31.943	10.9978	0
	hicB	U00096.3:1509507-1509924		3.51313	4.88977	4.61389		5.49327	3.57281	4.51537		0	2.40104	0		9.27665	1.71274	1.60661		3.15762	5.03577	1.12348
	ydcR	U00096.3:1510002-1511409		3.72416	4.12024	4.43918		2.96097	3.46119	3.10349		1.75038	3.73963	2.53068		3.63387	3.20791	3.16859		3.17573	3.39006	3.48896
	ydcS	U00096.3:1511653-1512799		0.453951	0.647248	0.176715		0	0.365079	0.501828		2.31382	0.479125	1.67046		2.87786	1.61311	2.00316		1.62906	1.72332	1.82134
	ydcT	U00096.3:1512816-1513830		0.403316	0.552855	0		0	0.647344	0.861871		0.282369	1.5067	3.80561		2.4955	1.8561	2.43321		5.00415	2.48797	1.21778
	ydcU	U00096.3:1513830-1515556		0.531497	0.131069	0.161973		0.440744	0.829443	0		1.70307	0.283542	1.03152		0.981982	0.890509	1.28233		0.512459	0.79544	0.668457
	ydcV	U00096.3:1513830-1515556		0.409002	0.45599	0		0.59237	0.72394	0.302409		0	0.245487	0.431092		3.37753	2.21352	1.40837		1.93823	1.29219	0.630365
	patD	U00096.3:1515577-1517002		0.0912793	0.921226	0.829042		0.876818	1.12912	1.03397		2.73851	3.29844	6.25928		7.57432	7.51099	4.8786		6.21613	5.19042	6.0526
	yncL	U00096.3:1517098-1517194		0	469.266	939.468		710.701	602.737	156.161		139.152	136.991	0		142.319	80.7178	70.326		70.042	159.681	89.1956
	ydcX	U00096.3:1517388-1517562		0	2.42621	0		0	23.0414	52.1686		19.4746	13.871	0		15.2598	25.1065	0		0	0	0
	ydcY	U00096.3:1517647-1517881		149.128	245.873	321.328		148.073	129.712	159.904		247.188	221.812	57.4688		112.702	204.001	130.005		71.5828	34.7408	138.265
	mnaT	U00096.3:1517881-1518846		6.97642	7.65449	9.83979		2.6876	1.54266	1.53553		1.73336	3.85743	1.17424		3.82403	1.64706	5.8362		2.25163	1.59261	3.65914
	ydcZ	U00096.3:1517881-1518846		3.06639	2.02393	3.58618		3.55424	2.79381	0		0	0	4.7441		3.47026	6.63104	2.0628		0.774125	2.34758	1.34819
	curA	U00096.3:1519026-1520064		3.69549	5.0221	8.11626		4.31689	3.28484	5.66384		2.37095	3.09881	2.58832		1.65778	2.17496	1.91953		4.65679	0.674852	2.02338
	mcbR	U00096.3:1520261-1520927		1.41373	1.08607	1.67743		0.910124	1.98364	1.84265		1.79561	2.64521	1.6359		0.371129	0.951731	1.30803		4.26723	2.18187	1.45797
	yncD	U00096.3:1520962-1523065		7.23357	5.98762	4.46941		4.90446	6.80285	4.68559		11.1985	14.2619	10.3989		11.9396	10.0578	10.583		10.0038	7.27364	8.79856
	yncE	U00096.3:1523306-1524368		25.3126	24.8706	20.0327		20.9828	19.8982	19.5543		17.9356	9.85713	14.6117		13.8372	9.66201	7.22575		9.66913	5.89776	7.07597
	ansP	U00096.3:1524480-1525980		2.12653	1.40677	2.11245		2.95957	5.15615	4.59758		2.40913	3.47517	10.039		5.19826	2.87369	4.47083		4.50218	2.73443	2.20647
	yncG	U00096.3:1526246-1526864		0.259417	0.468957	0.364992		5.6882	4.00573	3.0728		13.9552	3.7337	5.10623		4.28025	1.18404	3.12478		4.48024	3.51106	1.3736
	yncH	U00096.3:1526939-1527152		0	0	0		0	0	8.56726		36.7212	0	0		100.766	17.6507	0		6.22434	12.0793	8.47252
	rhsE	U00096.3:1527901-1530404		0.605532	0.35909	0.598949		0.346116	0.667436	1.13006		5.22093	0.82686	2.14371		2.06777	3.23468	1.90006		2.67232	1.35963	2.77124
	ydcD	U00096.3:1527901-1530404		0.271674	1.19376	2.59089		0.248802	0	1.10437		0	0	0.966202		0	0	0		0.491629	0	0.132006
	yncI	U00096.3:1530585-1531639		0.25913	0.441204	0.699616		0	0.0733049	0.943689		0.558494	0.245574	0		0.27537	0.158055	2.11813		1.22704	0.590751	0.832321
	ydcC	U00096.3:1531815-1532952		0.114582	0.920374	0.933631		0.631674	0.581004	0.511454		0.77322	0.913291	0		1.67473	1.14371	0.976896		2.42074	1.17569	1.39865
	pptA	U00096.3:1533051-1533851		12.9123	25.0802	33.1208		5.76724	4.79207	20.9776		4.39854	16.7966	0		8.16804	18.5161	5.82726		20.1047	8.94282	8.81014
	yddH	U00096.3:1533051-1533851		0.492731	1.94433	1.87689		0.466595	2.30928	5.21909		17.6083	11.1567	10.1209		24.9991	10.6862	16.3724		24.5694	10.6493	16.9974
	nhoA	U00096.3:1534023-1534869		0.258256	1.39886	2.44982		1.24102	1.40533	4.60145		25.7627	31.5526	32.3661		33.1758	26.3199	25.2427		26.7073	20.4642	14.6857
	yddE	U00096.3:1534964-1535858		3.657	5.5351	7.21856		0.338547	2.83814	4.98454		4.611	1.26554	4.72028		2.2591	2.19949	1.66198		2.8731	2.38075	2.3925
	narV	U00096.3:1535936-1542590		1.04345	0.587965	0.928264		0.951521	1.10299	1.63992		2.97164	2.49058	1.9102		1.49465	1.3746	0.780319		2.29739	1.64312	2.00519
	narW	U00096.3:1535936-1542590		0	0.23442	0		0	0.731071	0		0.42589	0.502545	0.939118		1.18073	0.190517	1.06579		0.521938	1.05816	0.306323
	narY	U00096.3:1535936-1542590		0	0.308776	0		0.135496	0.112286	0.402472		1.42844	1.7813	1.46366		2.67712	0.81642	1.31		1.83939	1.02039	1.25947
	narZ	U00096.3:1535936-1542590		0.0856255	0.253186	0.337223		0.171615	0.49826	0.644915		1.12615	1.02859	1.68697		2.30076	1.58769	1.73882		2.50349	5.14613	2.44471
	narU	U00096.3:1542671-1544060		0.157989	0.277422	0.339803		0	0	0.169152		0.19185	0.185745	0		0.178873	0	0.110284		0	0.198514	0.354952
	yddK	U00096.3:1544383-1545714		0	0	0		0	0	0		0	0	0		0.0832733	0	0		0	0.0801317	0
	yddL	U00096.3:1545749-1546028		0	0	0		0	0	0		0	2.01194	0		1.98017	0	0		0	1.49166	0
	yddG	U00096.3:1546287-1547169		4.32977	5.19035	11.2056		5.78538	7.6067	2.92721		1.73679	1.1777	1.97113		1.71909	0.39529	3.13856		3.61926	1.01308	3.05549
	fdnG	U00096.3:1547400-1550448		4.19238	6.92361	6.65629		2.57945	4.45079	5.82334		3.78132	3.04011	3.09979		2.43592	3.25476	2.35611		3.06272	1.65234	1.98572
	fdnH	U00096.3:1550460-1551991		2.46836	6.5271	3.86441		6.2414	9.87564	4.27322		7.23382	7.27747	7.43552		4.94112	5.76209	5.839		5.88627	2.99319	4.63928
	fdnI	U00096.3:1550460-1551991		9.62049	14.5171	8.10649		7.56181	26.2978	26.206		35.7197	17.983	16.6832		22.075	21.3458	23.5461		27.519	14.8837	9.88494
	yddM	U00096.3:1552397-1552682		32.7413	132.573	54.6202		103.741	89.0087	19.8796		61.3892	340.661	28.5646		113.623	52.655	95.746		70.5623	67.1442	24.4667
	adhP	U00096.3:1552827-1553838		2.14418	2.36517	2.40836		7.53016	7.67263	6.27055		5.04657	7.18457	2.96673		6.5057	6.30862	3.01712		2.05654	3.15193	2.78613
	maeA	U00096.3:1553971-1555669		26.8839	33.1217	29.0619		36.9742	39.2523	42.5105		67.3706	23.6199	39.0353		36.3426	29.7453	24.2857		22.4135	23.3491	20.4228
	sra	U00096.3:1555825-1555963		127.718	188.146	242.04		68.3128	66.3239	104.594		421.732	289.291	111.128		183.754	44.6182	147.739		193.633	21.573	125.781
	bdm	U00096.3:1556064-1556280		0	1.85663	0		0	0	0		0	0	0		0	0	19.8791		0	11.3086	3.55275
	osmC	U00096.3:1556624-1557056		9.5442	20.593	29.4161		12.2477	3.73215	17.8601		8.56899	5.88316	12.2306		7.94014	11.2632	8.03892		14.7027	4.46224	9.44928
	ddpB	U00096.3:1557111-1560929		0.10827	0.131463	0		0.901189	0.211679	0.254482		0	0.603834	0.353883		0.468308	0.78158	0.576954		0.541219	0.872011	0.495094
	ddpC	U00096.3:1557111-1560929		0.422884	0.178539	0.437635		0.78795	0.099904	0		1.09723	0.986945	0		1.03229	0.608972	0.341253		0.697168	0.442574	0.966594
	ddpD	U00096.3:1557111-1560929		0	0.374082	0.183355		0	0.559075	0.315617		1.11132	1.01087	0		0.642095	2.14555	1.26851		0.61675	1.13299	0.796773
	ddpF	U00096.3:1557111-1560929		0	0.529479	0.270607		2.32176	0.306708	0.730321		1.18097	2.35157	2.24246		2.48718	2.0324	1.57561		1.8316	1.58081	1.3464
	ddpA	U00096.3:1560930-1562481		0.17477	0.27645	0.267441		0	0.464447	0.191638		1.28691	0.916148	0.270301		2.40402	0.967464	1.58737		3.31886	1.8715	1.29247
	ddpX	U00096.3:1562494-1563076		0.322929	0.82718	0		0.464049	0.610527	0.543051		2.38342	1.2176	0.836299		0.965394	1.80681	2.59721		3.54177	1.50242	2.5762
	dosP	U00096.3:1563333-1565733		0.392429	0.532419	0.183115		0.510647	0.504644	1.4764		1.65003	2.29818	1.17099		1.53266	1.70863	3.26221		1.77893	2.36658	1.74131
	dosC	U00096.3:1565757-1567140		1.08025	0.528533	0.27441		1.69183	1.6797	0.773731		0.581019	0.650202	1.10547		1.85394	1.24176	0.862293		3.05757	2.74413	1.11691
	yddW	U00096.3:1567503-1568823		5.03311	6.68561	6.90444		4.96204	5.88047	7.20421		5.23995	4.79394	6.64751		6.46062	5.1232	5.27195		4.28053	4.40826	2.89488
	gadC	U00096.3:1568953-1570489		0.219445	0.389933	0.16143		0.945229	0.606228	0.310206		0.265251	1.31071	1.26441		1.66395	1.26288	1.77685		1.54436	0.249486	0.745832
	gadB	U00096.3:1570644-1572045		0.548625	0.762624	1.33505		0.730913	0.360496	0.381011		1.04703	1.4965	1.95408		1.54596	1.78937	0.890302		1.68045	1.16193	1.18873
	pqqL	U00096.3:1572406-1575202		2.58363	2.05614	1.09737		1.98603	2.45424	2.7175		4.41875	3.4356	4.23086		4.84327	4.16259	3.87319		6.53288	4.38597	3.16844
	yddB	U00096.3:1575246-1577619		1.15869	1.58107	1.16828		2.34646	1.45687	1.01436		1.45721	2.39384	3.23446		4.17199	3.43864	2.61102		5.31498	2.75261	2.41108
	yddA	U00096.3:1577656-1579342		0.486686	0.587288	0.291984		0.58072	0.787335	0.461479		0.551856	0.21031	0		0.526453	0.671049	0.525369		1.48657	1.21647	0.796433
	ydeM	U00096.3:1579632-1580790		0.212097	1.44224	0		0.641659	0.694388	1.02702		4.25455	7.02388	14.0012		13.0623	4.9382	8.94745		16.4778	14.9081	7.06457
	ydeN	U00096.3:1580841-1582524		2.69708	6.52331	6.91245		2.76643	3.98265	3.45016		5.82495	4.62119	3.7233		3.61249	5.1475	5.41903		5.47081	4.61254	5.74175
	ydeO	U00096.3:1582925-1583687		0	0.0735443	0		0.288027	0.121638	0		1.89496	0.368956	1.63345		1.0917	1.23828	0.767412		0.84453	0.981666	0.687481
	safA	U00096.3:1583761-1583959		0	2.45876	0		0	0	0		0	0	0		0	0	0		0	0	4.40373
	ydeP	U00096.3:1584206-1586486		0.343771	0.924002	0.204383		0.609079	0.558924	0.178422		0.95035	2.31308	0.704939		2.81935	2.07033	1.60479		2.70216	1.7696	1.21082
	ydeQ	U00096.3:1586819-1587734		0.501598	0	0		0.581051	0.12666	0.674408		1.97808	0.755028	0		2.13069	2.85381	0.815139		2.84442	0.943165	0.730537
	ydeR	U00096.3:1587792-1588296		0.271993	0.98262	1.06336		0	1.23209	0		0	0.524282	0		2.51684	4.2535	1.54156		4.50568	2.3376	3.14963
	ydeS	U00096.3:1588308-1588839		0	1.07251	0		0.769585	1.52598	3.96042		2.63214	0	0		3.23411	1.78296	1.29486		4.69828	2.18129	0.999278
	ydeT	U00096.3:1588852-1590079		0.491954	0.540986	0.343677		1.73309	0.686482	0.668773		1.07393	1.39896	2.62553		2.87992	1.9565	2.6372		4.5846	2.82024	3.58431
	yneL	U00096.3:1590333-1590536		0	7.1867	0		0	0	0		0	11.8643	0		0	0	0		15.587	12.8438	0
	hipA	U00096.3:1590853-1592442		3.61266	8.41405	5.8257		6.68796	3.73645	6.56289		12.3848	6.18908	6.24449		9.35166	5.72312	5.38757		6.59859	10.2116	5.31465
	hipB	U00096.3:1590853-1592442		7.99356	13.0871	7.61761		12.2378	1.00565	0		24.7665	0	0		2.67564	3.62061	4.71528		6.92684	2.6466	6.06454
	yneO	U00096.3:1592664-1597987		0.819769	0.844591	0.634999		1.31028	1.01151	2.08289		5.20142	3.81346	7.57162		7.10254	8.30196	8.49504		11.9078	7.59754	9.80615
	lsrK	U00096.3:1598616-1600209		1.03785	2.12261	1.21095		0.448101	0.845069	0.881584		1.81887	0.511388	0.729741		1.39587	1.16918	1.00095		3.89598	1.92552	1.68065
	lsrR	U00096.3:1600287-1601241		9.9927	11.0907	5.19858		1.16503	2.24486	2.21361		2.44145	3.88409	3.22528		5.07004	2.62722	5.21811		6.60619	5.86274	4.41403
	lsrA	U00096.3:1601489-1605039		0.899712	0.680676	0.336257		0.319838	0.548053	0		3.34603	1.13694	1.97566		2.59897	2.62951	2.54964		3.18123	3.25276	3.20915
	lsrC	U00096.3:1601489-1605039		1.45052	0.881594	0		0.242423	0.113729	0		1.93281	1.73629	1.06873		1.54897	2.32998	1.447		3.92561	2.656	1.66355
	lsrD	U00096.3:1601489-1605039		0.249342	0.95029	0		0.53276	0.224692	0		4.83816	0.797938	0.871519		2.00146	1.27423	1.99701		4.1717	1.94982	2.49873
	lsrB	U00096.3:1605050-1606073		0.503807	1.30762	0.571926		0.24232	1.08078	0		3.86933	0.876955	3.51114		7.94431	4.08242	2.9639		7.25879	3.93224	5.83693
	lsrF	U00096.3:1606099-1606975		1.19479	2.00438	4.46761		0.656886	1.40434	0.428865		4.41923	2.82495	6.71962		7.06925	4.16603	6.26446		5.96918	5.74845	6.11332
	lsrG	U00096.3:1606998-1607289		1.41073	5.74047	6.24804		0	1.19823	2.92069		21.575	17.0738	3.61804		16.2154	14.2244	12.1213		20.772	10.8915	31.6307
	tam	U00096.3:1607345-1608104		0.707605	1.40025	1.50065		1.81027	2.56358	1.12519		1.61554	0.819912	2.52317		1.66385	3.06593	1.27538		4.25327	2.81147	1.51415
	yneE	U00096.3:1608107-1609022		0.404878	0.583819	1.70411		0.277863	2.10144	1.25424		3.66698	2.63355	1.74464		1.30421	0.763685	0.821081		0.682833	0.109371	0.246398
	uxaB	U00096.3:1609228-1610680		0.966277	1.9405	0.72849		2.09803	0.697568	0.492642		0.904217	0.732077	0.896883		1.63746	1.09086	0.60416		1.42588	1.3693	2.48558
	yneF	U00096.3:1610906-1611854		3.09493	2.27479	1.99765		3.03777	2.73889	2.09092		1.22573	1.95746	4.74037		1.27679	1.80593	1.86114		2.875	1.21197	1.49924
	glsB	U00096.3:1611965-1613251		11.2415	8.95917	9.07718		9.25242	10.5319	16.1504		7.75801	4.6989	7.82046		7.27111	5.78039	5.99314		6.78269	4.82369	4.0954
	yneG	U00096.3:1611965-1613251		14.0858	7.80762	11.9406		19.9453	9.97629	6.34977		11.2563	6.42164	17.4341		3.15862	7.2824	6.50571		7.1827	10.198	2.81392
	sad	U00096.3:1613314-1614703		4.7625	5.23218	5.58507		3.78506	7.03057	3.3721		1.43191	1.92473	2.53969		1.22943	2.17102	1.88203		1.31757	1.5727	1.60261
	yneJ	U00096.3:1614803-1615685		4.56175	5.00366	2.23646		2.11629	1.29888	3.45775		0.370506	1.74528	0.456733		0.82531	0.875454	1.25731		1.56847	1.64626	1.52758
	yneK	U00096.3:1615762-1616878		0.234147	0.413169	0		0.225749	0.363775	0.296482		0.466968	0	0		0.709048	0.268384	0		0.422885	0.0814015	0.37079
	ydeA	U00096.3:1617027-1618218		0.38091	1.75514	2.95754		2.75787	5.36294	4.9144		3.26417	3.33023	6.28447		3.52944	3.25235	0.903485		0.49176	0.827826	0.306254
	marC	U00096.3:1618242-1618908		13.1134	22.0412	17.0925		7.79895	3.62915	3.42635		2.59219	6.77226	12.3083		5.08969	3.93041	13.5837		3.34512	5.7741	2.82873
	marR	U00096.3:1619119-1619554		4.92513	2.51787	3.60207		8.93016	7.30468	6.55723		4.09309	6.15481	6.41123		6.34264	6.08932	1.78838		12.4819	10.1779	9.74362
	marA	U00096.3:1619573-1619957		29.9148	37.6371	37.92		34.7442	39.4027	55.4944		58.4461	40.0889	26.6419		33.0451	46.7923	34.184		61.047	32.9102	47.0684
	marB	U00096.3:1619988-1620207		10.9679	85.9248	98.9048		28.9912	90.8626	81.4116		85.5232	112.872	84.5343		85.8222	52.4517	69.9562		61.6595	75.5001	59.8123
	eamA	U00096.3:1620237-1621137		3.63383	4.14558	3.17194		2.00529	1.99971	3.43792		4.55922	1.11269	2.53148		2.56638	2.26812	2.12226		3.23587	2.19484	2.32302
	ydeE	U00096.3:1621331-1622519		0.357667	0.963853	1.03778		1.67431	0.317862	0.624142		0.478725	1.0814	0.612461		0.992051	0.857307	0.432594		1.80892	0.91028	0.718565
	yneM	U00096.3:1622645-1622741		40.1014	190.474	144.484		147.32	44.21	0		0	0	0		57.1103	246.44	0		0	0	28.6501
	mgrR	U00096.3:1622816-1622914		126434	122345	65518.5		112680	153638	99717.5		44469.4	117913	101461		26727.6	17719.6	29385		34014.1	24625.7	11353.7
	dgcZ	U00096.3:1622959-1623850		1.58275	3.10583	0.709688		1.6808	4.09673	2.95021		0.993207	2.42052	5.97786		5.62752	0.732245	2.78696		4.23153	4.27012	1.22731
	ydeI	U00096.3:1624104-1624497		0	0.639248	0		0	0	0		0	1.72969	0		0	1.89405	0		2.85938	0	2.08761
	ydeJ	U00096.3:1624772-1625291		0.298051	0.661525	0.519512		0	0.900303	0.573448		1.23699	2.04964	0		0.97544	0.688844	0.840467		4.67952	0.705747	1.0175
	dcp	U00096.3:1625334-1627380		4.03464	7.64235	6.34509		6.01454	4.71297	6.26602		5.3992	3.39508	2.32561		3.85355	3.38614	1.90489		2.74276	2.47849	2.56903
	ydfG	U00096.3:1627516-1628263		54.7079	47.4081	45.4908		29.3277	40.2362	44.5418		36.7901	13.4243	23.0465		9.96792	13.1467	6.22447		19.2869	10.4809	13.9959
	rspR	U00096.3:1628351-1629038		6.2118	7.1554	7.48589		4.63479	4.91355	11.1196		7.18919	5.14173	10.1105		6.98679	12.1761	11.3813		7.46629	4.46337	7.50076
	ydfZ	U00096.3:1629214-1629418		17.1026	39.8347	69.6253		11.0926	11.6149	50.4776		5.69298	3.86782	8.63283		5.08667	18.8572	21.2922		35.6057	6.91158	22.0278
	ydfI	U00096.3:1629452-1630913		0.699143	0.305322	0.556949		0.815126	0.368601	0		0.180319	1.4945	1.68503		3.92202	2.39925	1.74895		3.22347	1.95221	1.38136
	cspB	U00096.3:1631001-1652838		0	0	0		13.564	0	0		0	4.74968	0		0	0	13.1068		0	0	1.51135
	cspF	U00096.3:1631001-1652838		15.6198	9.61799	0		0	12.2532	27.4595		11.2826	16.0552	0		0	5.21668	14.4753		19.0535	18.1669	5.45876
	cspI	U00096.3:1631001-1652838		0	0	0		0	0.0818556	0		0	0	0		0	0	0		5.61807	0	0
	dicA	U00096.3:1631001-1652838		48.839	65.0777	33.6343		42.8134	28.2931	63.2511		20.8841	22.0604	31.4215		36.4023	21.7573	14.2354		41.0885	8.16688	32.3918
	dicB	U00096.3:1631001-1652838		0	0	0		0	0	0		0	0	9.86565		0	0	0		0	0	0
	dicC	U00096.3:1631001-1652838		0	0.210163	0		1.03288	0	0		0	0	0		0	0	0		0	0	0
	dicF	U00096.3:1631001-1652838		0	615.412	0		0	879.886	0		0	0	1249.25		958.391	0	1223.77		0	395.423	371.728
	essQ	U00096.3:1631001-1652838		3.13698	0	0		4.09949	0	0		0	0	0		6.65559	0	0		0	0	0
	flxA	U00096.3:1631001-1652838		2.48904	0	1.80231		0	0.893882	4.54441		27.1311	8.38903	5.85937		8.02309	4.56702	4.08246		5.15185	10.3314	3.96838
	gnsB	U00096.3:1631001-1652838		602.621	880.631	825.456		370.319	366.605	1037.44		492.352	115.422	972.906		57.3241	163.682	332.76		414.473	54.7372	97.8698
	hokD	U00096.3:1631001-1652838		0	0	0		0	0	5.08064		0	0	2.11907		0	9.3924	0		0	0	11.1241
	intK	U00096.3:1631001-1652838		0	0	23.1193		0	0	0		0	0	0		0	0	0		0	0	5.37893
	intQ	U00096.3:1631001-1652838		0	0.716318	0		0	0.180508	0		1.22035	0.622116	0		1.23913	0.698184	1.28926		0	0.992913	1.16678
	nohQ	U00096.3:1631001-1652838		0	0	0		0	0	0		0	0	0		0	0	0		0	0	0
	pinQ	U00096.3:1631001-1652838		1.68858	0.516158	1.53673		3.07955	4.11024	6.32688		46.1498	35.2023	29.7163		38.7956	27.7271	45.9376		32.718	15.455	14.8255
	quuQ	U00096.3:1631001-1652838		0	0	0		0	0	0		1.66899	0	0		0	0.83147	0		0	0	0
	relB	U00096.3:1631001-1652838		0	8.81193	0		6.88341	1.68295	9.79757		2.98701	0	0.159447		1.85079	0.0841182	1.69323		11.1707	0	6.49453
	relE	U00096.3:1631001-1652838		44.2252	19.7921	25.2603		17.9105	4.41911	49.109		1.5283	0	33.5213		3.8027	34.6445	32.0321		64.9728	17.4922	50.4978
	rem	U00096.3:1631001-1652838		0	0	0		0	3.22626	0		3.81698	4.63583	0		0	0	0		0	0	0
	rrrQ	U00096.3:1631001-1652838		0	0	0		0	0	0		0	0	0		0	0	0		0	0	0
	rzoQ	U00096.3:1631001-1652838		0	0	0		0	0	0		3.37446	0	0		0	0	0		0	0	0
	rzpQ	U00096.3:1631001-1652838		0	0	0		0	0	0		0	0	0		0	0	0		0	0	0
	stfQ	U00096.3:1631001-1652838		0	0	0		0	0	0		0	0	0		0	0	0		0	0	0
	tfaQ	U00096.3:1631001-1652838		0	0	0		0	0	0		0	0	0		0	0	0		0	0	0
	ydfA	U00096.3:1631001-1652838		0	7.68791	0		0	0	28.0286		0	0	0		0	7.11173	0		17.4032	9.26378	0
	ydfB	U00096.3:1631001-1652838		19.6733	49.925	185.189		0	0	0		0	0	0		0	0	0		0	24.4777	22.2634
	ydfC	U00096.3:1631001-1652838		0	4.86624	0		4.99144	5.45717	6.35854		0	6.81979	0		0	0	0		12.5609	6.70705	2.49293
	ydfD	U00096.3:1631001-1652838		0	0	0		8.50785	0	0		0	6.31174	36.726		0	0	0		36.2908	0	17.0374
	ydfE	U00096.3:1631001-1652838		0.516486	1.35107	0.426729		0	0.419117	1.10835		0	0.714096	0		0.641475	0.78537	0		1.07648	0.125772	0.316514
	ydfJ	U00096.3:1631001-1652838		3.70314	4.60991	7.63433		4.04577	6.18141	5.59241		3.60768	5.5518	4.11822		5.49168	4.57308	9.57737		6.61723	5.90465	2.59478
	ydfK	U00096.3:1631001-1652838		5.86226	0	0		5.29543	9.33741	5.28677		11.9646	5.76224	11.7291		0	2.8205	36.6221		16.5487	19.088	7.07265
	ydfO	U00096.3:1631001-1652838		1.27938	1.5918	6.48941		0	3.40277	0		0.875366	2.35961	5.23839		3.88616	7.45116	5.24001		8.0767	2.32185	1.03884
	ydfR	U00096.3:1631001-1652838		0	0	0		0	0	0		0	0	0		0	0	0		0	0	0
	ydfU	U00096.3:1631001-1652838		0	0	0		0	0	0		0	0	0		0	0	0		0	0	0
	ydfV	U00096.3:1631001-1652838		0	1.26651	4.73747		0	1.88624	0		0	0	0		2.64815	0	0		1.9454	0	0
	ydfX	U00096.3:1631001-1652838		0	0	0.689364		0	0	0		0	0	0		0	0	0		0	0	0
	ynfN	U00096.3:1631001-1652838		0	0	0		0	0	0		0	0	0		0	0	0		0	0	0
	ynfO	U00096.3:1631001-1652838		0	18.6663	0		0	0	0		0	3.67904	0		0	0	0		4.31701	1.6864	2.4468
	rspB	U00096.3:1652895-1653915		0.116431	1.00157	0.996806		1.47542	2.59034	2.59601		5.88334	8.02944	9.85767		18.8059	11.718	10.0793		15.5469	8.54873	8.08572
	rspA	U00096.3:1653926-1655141		0.354806	0.837256	0.279705		0	0.232239	0		0.729119	0.397012	0		1.07832	1.53983	1.32751		1.62551	0.834398	0.625224
	ynfA	U00096.3:1655346-1655673		3.56026	3.45685	3.60044		7.76999	2.26753	3.1798		3.73973	0	5.25049		1.84796	6.98668	3.88807		10.4379	3.54592	1.16526
	ynfB	U00096.3:1655807-1656149		50.5468	61.5863	47.5001		40.5599	27.4266	83.2237		57.6939	12.6403	42.5271		9.9215	50.5963	22.1702		50.3225	7.44694	40.3497
	speG	U00096.3:1656183-1656744		61.6043	72.3116	87.5226		56.3904	89.9011	110.466		90.6323	75.8564	103.953		52.6861	33.3542	37.613		40.6499	31.5411	21.9087
	ynfC	U00096.3:1656746-1657457		8.41458	14.7559	11.0327		9.95534	9.68406	5.0573		4.24718	10.504	2.35124		6.17689	1.81825	3.34765		3.58882	8.45568	3.30878
	ynfD	U00096.3:1657564-1657870		12.0516	30.6458	31.3425		18.5656	12.7517	53.2117		58.3307	17.3235	18.3716		11.673	10.9094	8.49981		28.3272	15.6813	15.0451
	ynfE	U00096.3:1658068-1660495		0.130447	0.297645	0.111736		0.0863378	0.157911	0.382408		0.39089	0.582002	0.744729		1.07174	1.00599	0.949368		0.90552	1.12029	1.00935
	ynfF	U00096.3:1660555-1662979		0.340941	1.08288	0.755981		1.14671	0.983419	1.15432		4.85669	3.30529	3.0021		4.56455	3.75312	4.79298		3.45167	3.55415	3.87245
	ynfG	U00096.3:1662989-1663607		0	1.36292	0		0.566912	0.836018	2.15494		1.28111	4.67069	1.57757		8.16541	5.21698	3.65302		6.18786	5.53273	3.83397
	ynfH	U00096.3:1663608-1664463		1.76099	7.22143	3.09583		5.25814	4.00675	2.38215		6.66092	6.47879	9.46081		13.5213	8.6606	6.23342		7.845	8.65133	4.58325
	dmsD	U00096.3:1664505-1665120		3.17462	7.83186	13.1153		9.44482	5.49605	7.26524		23.6452	5.29247	17.509		6.42449	7.73867	5.05946		5.9337	7.00107	9.4084
	clcB	U00096.3:1665314-1667219		0.996136	0.496143	0.881251		0.965554	0.342994	1.7296		0.239695	0.901836	1.70625		0.89647	0.985517	0.931572		0.614744	0.963329	0.447116
	ynfK	U00096.3:1665314-1667219		6.37175	29.3726	29.7245		1.36243	3.79244	2.02753		0	4.59136	2.77094		5.44465	3.19002	4.12745		12.9057	9.03333	11.4346
	mlc	U00096.3:1667343-1668564		12.5696	20.2538	14.8722		5.78209	4.66256	3.71535		8.26249	7.30939	9.99486		14.4508	18.1683	25.7999		28.2109	28.4007	31.454
	ynfL	U00096.3:1668698-1669592		1.56596	0.692544	1.37094		1.03138	0.958484	0.292002		3.53316	2.16797	0.394741		2.03235	4.30377	1.10684		3.0807	1.68062	2.70832
	ynfM	U00096.3:1669698-1670952		0.667918	1.35651	0.558928		2.86426	2.14736	1.28604		1.24616	0.75444	1.2741		1.52351	0.688895	0.698947		1.18023	1.04981	0.551348
	asr	U00096.3:1671375-1671684		0	0	1.51406		0	0.966622	0		0	0	0		0	0	0		0	0	1.81946
	ydgU	U00096.3:1671776-1671860		0	0	0		0	0	0		0	0	0		0	0	0		0	0	0
	ydgD	U00096.3:1671959-1672781		3.53651	5.21598	7.01956		2.58095	2.37625	3.25492		1.78218	1.33826	4.00022		1.84475	2.33986	1.87043		0.762732	2.18102	2.31495
	mdtI	U00096.3:1672819-1673501		0.951892	4.24879	2.563		1.00503	0.800145	4.83691		3.42602	0	1.73281		6.47998	1.7218	0.751682		4.64774	3.7266	2.36657
	mdtJ	U00096.3:1672819-1673501		2.84564	3.62295	7.41638		1.51803	8.08091	8.15416		0	0	2.38823		1.46907	4.12497	1.91623		6.45523	8.78205	1.12006
	tqsA	U00096.3:1673912-1674947		0.680389	2.5796	3.23473		0	1.18584	1.11364		0.638361	1.37294	2.79681		1.76286	0	2.57553		1.35912	1.53695	0.860779
	pntB	U00096.3:1674971-1676360		62.0032	94.9039	91.7154		102.191	110.622	72.6909		57.8551	55.6678	78.5329		53.9684	24.1592	31.0734		29.0746	36.6403	19.4785
	pntA	U00096.3:1676370-1677903		24.2622	37.2066	35.3602		37.8273	29.6638	42.3553		30.164	20.2208	22.7096		13.3586	14.3231	9.84113		12.0141	10.0774	14.4209
	ydgH	U00096.3:1678426-1679371		23.7335	30.1993	40.0679		23.9591	21.4166	44.3274		27.2774	21.7125	18.8253		22.4768	18.4083	20.0345		19.457	12.5486	14.6513
	ydgI	U00096.3:1679556-1680939		3.56464	1.4676	2.01049		4.0236	4.52059	6.63207		5.79457	2.02754	3.60738		5.8609	7.59609	3.22071		5.22514	3.76611	2.17844
	folM	U00096.3:1680975-1682030		6.54225	4.97846	2.66629		2.4106	4.46407	9.87231		8.85106	2.16914	3.6999		4.20128	6.11934	3.80704		4.24322	3.6194	4.06734
	ydgC	U00096.3:1680975-1682030		21.4136	10.8724	12.0729		12.8018	16.3073	13.4376		6.2379	6.79062	0		20.9455	0.956522	4.29558		11.6815	15.3228	11.4616
	rstA	U00096.3:1682158-1682878		16.541	22.7499	20.1188		22.0156	20.7577	20.1543		22.3155	15.6743	11.1007		20.6835	15.7454	10.1273		23.5631	10.8423	14.5302
	rstB	U00096.3:1682881-1684183		7.85016	11.8747	8.21411		12.466	12.9525	8.14586		3.60232	3.38307	2.67862		7.03647	3.1937	3.91902		7.04893	8.03352	5.48077
	fumC	U00096.3:1684258-1686588		4.14599	6.0479	6.63273		2.16542	1.15558	2.66666		0.565154	0.508457	3.3081		1.55703	3.11094	0.708843		2.93513	4.6314	4.29262
	tus	U00096.3:1684258-1686588		4.10881	4.82661	6.28049		1.42965	1.62924	4.64358		1.34386	2.07802	1.55048		2.96915	1.38266	0.826428		3.05354	0.846585	2.77776
	fumA	U00096.3:1686730-1688377		44.5791	80.9648	74.233		52.9934	45.5454	45.9003		59.0466	30.2777	25.4202		26.5346	22.966	21.487		41.0764	45.7861	60.2694
	manA	U00096.3:1688575-1689751		16.4411	39.3897	27.2177		29.6813	25.4126	27.8894		12.3499	13.1799	20.0905		13.0334	5.58955	6.3334		4.54706	7.72803	5.04999
	ydgA	U00096.3:1689851-1691360		24.5666	37.9254	29.081		34.0958	34.4925	46.5348		40.3362	33.0983	32.2219		32.2832	21.9624	21.036		21.4311	13.2787	11.4768
	uidC	U00096.3:1691585-1692851		0.758564	2.37534	4.78263		0.76574	0.522676	0.260242		0.481236	0.914613	1.74074		1.43669	2.17849	0.795669		0.886107	1.64081	1.27372
	uidA	U00096.3:1692889-1696071		2.75925	7.34535	6.00372		2.14006	3.84824	5.88842		8.9117	10.1066	8.45613		11.3043	6.18955	5.49533		9.23984	9.94658	6.08676
	uidB	U00096.3:1692889-1696071		0.767429	2.83534	2.16848		0.794263	1.52656	1.11729		3.32975	2.36197	2.98074		2.90937	1.85392	2.01645		1.97617	2.23831	1.1648
	uidR	U00096.3:1696461-1697052		13.5987	20.7551	24.7471		13.7542	7.71883	28.9708		26.8258	18.3337	20.4161		22.6701	12.0208	17.96		27.2505	8.37059	26.7918
	hdhA	U00096.3:1697272-1698040		15.8941	24.9875	13.0358		14.2814	13.9965	14.9077		25.0278	14.9314	21.0357		40.7754	27.3651	23.5474		35.1003	25.3855	24.7249
	malI	U00096.3:1698151-1699180		3.59096	2.26036	1.93755		3.14952	6.30454	6.5793		48.194	38.3487	47.0143		44.4776	44.6087	33.5787		35.3956	34.1423	25.3825
	malX	U00096.3:1699354-1700947		7.97765	7.64363	3.45157		0.30741	0.906148	1.39438		2.24336	1.01671	1.57728		1.07702	1.95642	2.5892		1.89918	4.75238	3.19141
	malY	U00096.3:1700956-1702129		12.4202	14.8363	6.44025		5.16193	8.11004	3.98986		3.67762	4.752	5.52856		6.42171	3.58617	5.02513		8.09549	6.10174	4.29171
	add	U00096.3:1702232-1703234		28.5074	77.4238	69.8427		36.5979	30.8191	60.9548		55.5337	27.4569	39.0728		32.9162	27.5298	26.3482		38.2901	13.5815	27.0566
	ydgJ	U00096.3:1703267-1704308		13.321	15.7534	16.94		10.1056	3.87945	9.20094		6.18905	3.11265	7.83701		4.62758	8.02741	5.83281		7.75361	4.58039	7.34192
	blr	U00096.3:1704550-1704676		450.238	560.036	679.753		0	365.392	161.312		0	119.411	260.978		159.291	183.255	0		196.267	156.801	80.6949
	cnu	U00096.3:1704948-1705164		34.3451	51.6422	34.9999		25.6617	53.1048	38.7791		21.3029	29.1677	67.5757		54.3961	24.8661	70.1692		56.9593	23.5245	25.597
	ydgK	U00096.3:1705249-1705690		7.38968	22.0333	14.9297		30.1566	31.5894	20.0547		10.1359	23.0211	22.4214		28.8451	23.3088	17.4179		27.0567	14.5606	10.1176
	rsxA	U00096.3:1705766-1709141		9.08627	4.12231	5.59419		16.9685	14.7601	18.5941		21.387	14.6268	16.6642		9.48397	12.8761	15.808		14.8207	11.3957	8.21344
	rsxB	U00096.3:1705766-1709141		9.4107	2.61319	2.75483		9.05073	9.66874	14.4915		15.5826	6.57379	20.1069		8.19939	13.3595	11.6655		12.7047	7.58952	4.97407
	rsxC	U00096.3:1705766-1709141		8.65402	4.66892	4.03889		13.9941	14.3018	17.8121		24.0625	12.0889	12.2113		17.3553	14.0829	11.9857		11.9851	8.20146	9.8778
	rsxD	U00096.3:1709141-1710200		9.64401	3.53291	5.44378		10.0306	12.7755	17.7612		9.83424	5.0336	17.9493		15.3603	15.0639	11.7966		16.3543	7.62287	6.68084
	rsxG	U00096.3:1710203-1710824		26.1988	11.7729	6.26244		24.9187	23.7938	38.3075		36.5774	32.2652	28.4493		22.4928	29.4349	18.9351		26.0599	12.6865	18.5123
	nth	U00096.3:1710827-1712158		14.1827	4.01844	3.4687		8.41752	15.7874	24.6331		20.0252	25.3016	16.4942		27.8226	10.6268	8.23597		13.5226	8.25883	8.43688
	rsxE	U00096.3:1710827-1712158		9.28639	6.71534	3.29211		8.95241	9.27278	19.9562		31.5992	14.8965	4.67231		15.2113	13.8145	7.53989		8.84872	9.44483	8.72066
	dtpA	U00096.3:1712768-1714271		41.3417	27.5384	23.7428		41.59	40.8213	46.7569		28.0782	19.4794	21.8198		22.1096	24.9867	22.1801		37.2236	21.2423	19.5157
	gstA	U00096.3:1714376-1714982		24.4249	44.8695	31.2195		25.8526	26.6336	32.3772		19.2485	23.9485	22.602		21.6514	8.19301	13.4734		12.6455	9.14456	9.35045
	pdxY	U00096.3:1715025-1715889		13.0319	12.9632	16.1321		17.9818	11.3366	15.9567		12.776	4.19344	9.1913		4.69912	10.6224	6.01624		3.58939	4.79801	6.60369
	tyrS	U00096.3:1715947-1717222		60.4408	68.9672	61.4919		71.8163	68.2235	75.2776		93.2394	58.6263	56.7774		56.2455	58.521	43.8158		29.2736	28.2727	27.8529
	pdxH	U00096.3:1717350-1718007		21.0939	25.4421	15.3487		23.1676	29.657	15.7633		13.9966	15.3832	8.91365		15.9908	13.5445	10.1371		18.5867	9.75634	7.58624
	mliC	U00096.3:1718065-1718395		0	3.77574	3.92647		1.19859	3.02407	2.34566		2.48085	0	1.99334		0	4.19474	7.28479		2.05774	0	1.52564
	anmK	U00096.3:1718492-1719602		6.23078	6.25519	6.98726		4.45932	3.86657	5.04496		4.31158	1.54223	6.58088		2.48741	4.74754	3.33772		5.59509	2.72365	3.00819
	slyB	U00096.3:1719875-1720343		340.043	305.034	289.156		408.807	410.967	509.149		232.972	277.34	298.417		353.022	286.579	161.065		341.574	161.72	208.899
	slyA	U00096.3:1720389-1720824		47.2228	60.6909	42.5649		49.8667	55.4375	91.8768		89.841	76.7793	67.4741		97.63	72.1979	39.8188		118.157	51.1068	70.1909
	ydhI	U00096.3:1721024-1721261		10.1027	7.37459	4.61384		75.4275	85.3425	93.7615		260.251	445.636	293.996		389.33	263.614	214.198		425.389	413.548	197.894
	ydhJ	U00096.3:1721263-1724133		5.64667	2.445	1.5345		5.76838	6.84025	18.183		26.2952	9.32362	70.902		14.7493	77.8133	58.1635		78.2063	26.9881	62.2707
	ydhK	U00096.3:1721263-1724133		1.32632	1.21374	1.21241		2.67072	4.46837	7.81824		39.2674	30.745	27.7593		41.5889	24.1612	22.9914		38.0312	32.2177	27.0628
	sodC	U00096.3:1724133-1724655		2.03303	5.97068	5.89038		2.36867	2.06297	3.33039		7.35595	1.5362	3.96897		2.15201	7.3084	3.98468		9.62049	1.33333	6.05175
	ydhF	U00096.3:1724735-1725632		11.247	12.776	10.9496		7.63309	7.037	7.33689		15.4351	8.2531	9.6058		9.07017	7.31935	8.73604		11.1166	7.00465	8.98773
	ydhL	U00096.3:1725680-1725920		3.45523	2.53187	11.2678		13.1097	1.73121	0		0	0	6.36619		0	0	3.09144		0	3.7177	0
	nemR	U00096.3:1726022-1726622		7.24739	2.89528	3.02886		1.33088	2.3944	2.66889		7.18686	0.504491	9.5005		6.33328	6.43375	2.97622		3.69121	6.63267	4.51096
	nemA	U00096.3:1726658-1727756		2.34266	4.67396	8.22056		8.12231	4.69525	7.14887		5.28966	11.3741	5.1531		8.28241	13.1045	8.46393		10.8125	7.74924	8.34743
	gloA	U00096.3:1727836-1728244		16.8076	25.5225	47.1134		32.7424	28.8652	33.4441		3.33288	1.03266	14.2696		9.14699	2.97933	12.7725		11.3384	7.37705	7.10239
	rnt	U00096.3:1728346-1728994		6.38058	4.5075	8.5344		3.5723	11.1941	14.095		23.5955	6.85542	10.8021		7.81818	11.7609	8.21131		10.4063	5.96357	7.60993
	lhr	U00096.3:1729086-1733703		0.768653	0.878081	1.18184		1.01406	0.960111	0.959587		1.41025	0.617368	1.16116		0.897989	1.33698	0.736539		1.24056	1.40486	1.33717
	grxD	U00096.3:1733753-1734101		82.2423	87.1966	90.0591		64.2787	79.1573	73.4221		99.3201	58.9972	80.5928		48.7766	98.479	38.1124		122.374	39.1788	99.4698
	mepH	U00096.3:1734434-1735250		15.3163	12.8522	7.65901		7.60765	5.96958	14.9918		2.82929	5.96487	6.20908		7.22305	6.78719	6.09771		16.2439	9.51866	8.36843
	sodB	U00096.3:1735377-1735959		223.873	258.981	260.518		222.427	256.722	430.795		542.086	338.905	410.894		355.112	315.1	210.178		278.496	186.246	275.297
	ydhP	U00096.3:1736120-1737290		0.518228	1.87516	3.47997		2.38782	3.33822	2.19359		1.18071	1.94507	0.879102		1.48109	1.57601	1.99637		1.04694	0.919094	1.37243
	ynhF	U00096.3:1737455-1737545		279.122	1038.78	784.291		734.752	565.728	2310.58		621.504	451.831	816.033		329.397	331.664	949.95		819.223	359.683	949.26
	purR	U00096.3:1737843-1739798		22.8463	11.9289	10.0798		20.8632	33.7713	29.5554		17.3491	20.0174	26.9035		20.6032	17.4351	16.4782		24.4838	14.8165	13.5903
	ydhB	U00096.3:1737843-1739798		1.01004	2.90173	7.49205		1.66761	1.96291	2.20937		5.78547	2.80332	0.964327		3.17962	4.98568	2.55736		3.97561	2.99588	5.49752
	ydhC	U00096.3:1739910-1741122		18.0413	18.7123	24.2408		23.2936	27.751	24.0315		29.9306	23.2465	32.8435		30.5962	28.4408	20.4635		29.5664	16.7838	8.07162
	cfa	U00096.3:1741412-1742561		15.6705	26.4849	18.956		26.9495	33.7203	41.0211		30.147	32.6027	17.0263		38.2537	14.025	19.0034		23.5553	18.3242	15.2715
	ribC	U00096.3:1742600-1743242		80.194	101.398	106.249		86.6385	91.7928	75.5619		51.4796	57.3586	54.6427		50.9995	44.5705	57.4412		57.0079	57.1133	37.3856
	mdtK	U00096.3:1743456-1744830		4.9093	3.26232	6.27258		3.5706	3.42297	7.39603		3.20817	3.03354	4.98164		4.32014	6.872	4.69948		4.87958	2.00219	3.91586
	ydhQ	U00096.3:1744870-1746127		12.7791	22.078	22.7501		20.7077	20.9358	29.8191		21.6204	20.3491	17.6195		35.765	22.212	19.1387		30.2152	18.4874	27.1966
	valV	U00096.3:1746434-1746511		69449.1	76643.3	64756.2		68781.2	96131	345919		1263540	545147	113185		276139	184487	127213		249364	81476.2	316849
	valW	U00096.3:1746515-1746592		99999.1	42684	47675.9		70425.7	61889.1	237167		676351	324453	79785.1		128000	137747	88887		202256	40604.9	331020
	ydhR	U00096.3:1746699-1747005		110.716	186.354	137.487		164.587	146.712	215.348		260.361	345.556	204.28		320.267	101.598	114.896		182.593	110.48	49.2631
	ydhS	U00096.3:1747130-1748735		0.207012	0.477548	1.25042		0.264106	0.67931	0.418497		0.901935	0.419725	0.606296		1.36217	0.561927	0.471298		0.232335	0.812094	0.464395
	ydhT	U00096.3:1748746-1749559		0.196229	0.53227	1.12859		0.748219	0.169568	1.04188		4.55101	0.580018	16.8377		2.8713	1.29766	1.61996		0.746079	2.13244	1.81149
	ydhU	U00096.3:1749562-1751013		0.361158	2.28385	1.04373		0.981792	0.574458	2.02199		1.39719	0.960318	5.14541		2.48653	2.45867	2.88868		1.66539	1.83728	1.12412
	ydhX	U00096.3:1749562-1751013		0	0.492922	0.710498		0	0.185003	0.473343		3.1507	2.01635	1.37919		0	1.8825	3.10972		2.77566	1.60356	1.39875
	ydhW	U00096.3:1751076-1751724		0	0.863473	0		0	0.434446	0.576925		4.82336	2.0463	4.11348		2.23913	9.23026	3.01902		4.23744	1.86426	3.21416
	ydhV	U00096.3:1751727-1753830		0.209099	0.241812	0.0841359		0.0968246	0.136647	0.239867		0.944936	0.72342	1.91401		1.10269	1.0823	1.19549		0.931406	1.291	0.576526
	ydhY	U00096.3:1753850-1754477		0.523264	0.36885	0.923086		0	0.466432	0.492892		0	0	1.76983		0.369863	0	2.31721		1.22574	1.12385	0.425761
	ydhZ	U00096.3:1754931-1755141		55.9567	83.6641	152.539		101.323	102.891	230.104		56.8742	85.6665	107.665		49.383	97.7017	42.3502		90.4702	15.3609	36.3588
	pykF	U00096.3:1755697-1757110		50.7438	71.0036	64.8249		87.7052	106.823	116.998		100.875	74.4821	109.381		63.6622	89.0991	58.5751		53.0035	41.5045	48.2967
	lpp	U00096.3:1757420-1757657		1172.29	907.977	1810.67		1501.41	1584.99	1815.72		1978.78	1128.88	1265.61		1215.8	822.594	1423.09		631.929	296.144	1328.12
	ldtE	U00096.3:1757720-1758725		2.2651	2.7942	4.03556		6.58659	4.24285	3.60391		3.84205	2.02835	2.35871		2.42288	3.03638	2.4166		3.55713	1.95507	2.54747
	sufE	U00096.3:1758873-1759290		5.13198	5.60204	7.06451		11.5311	5.26261	12.5964		10.1384	7.08454	0		2.84249	6.88831	2.45094		3.5065	8.68692	8.60215
	sufC	U00096.3:1759302-1762512		6.34736	3.57198	2.38518		13.5924	5.10452	1.72313		8.11033	5.1168	9.03847		6.51689	8.24437	2.92976		7.91577	5.8003	7.0553
	sufD	U00096.3:1759302-1762512		3.3204	2.64909	1.54359		5.12804	5.03923	4.24761		8.07852	2.69405	8.40892		8.24213	4.58173	5.61231		6.33244	4.91758	6.13293
	sufS	U00096.3:1759302-1762512		2.92357	3.97749	1.01805		5.67676	4.54863	4.32978		7.87341	4.13852	5.35145		4.23459	6.08718	5.25652		5.93168	4.17781	5.16136
	sufB	U00096.3:1762521-1764009		3.88728	3.45712	6.9558		6.43015	6.34844	4.23979		4.43123	3.98841	5.54616		3.78715	3.10713	2.90187		5.82358	3.8077	4.26346
	sufA	U00096.3:1764017-1764386		1.73527	3.89522	2.2945		2.85353	2.16342	3.32609		11.2557	5.35623	2.30804		4.29655	0.852892	4.34313		1.25729	0	0.697588
	rydB	U00096.3:1764712-1764780		1899.25	3521.61	1573.41		1897.08	2120.71	2486.28		1431.25	2388.85	2420.09		237.169	2418.85	2121.34		1736.91	0	1646.1
	ydiH	U00096.3:1764933-1765122		3.01836	32.6389	48.8912		30.4388	40.4628	74.8823		101.374	21.162	72.481		46.1268	39.054	4.75176		29.2516	16.3792	17.6643
	menI	U00096.3:1765221-1768685		3.79271	5.96157	4.61638		11.7573	12.0638	15.2548		9.44616	7.57218	7.61427		4.09844	4.79449	19.0517		4.80316	2.05909	13.5403
	ydiJ	U00096.3:1765221-1768685		1.78445	3.87106	3.51627		5.3184	2.9003	3.01587		2.55962	1.96255	4.19207		2.25618	3.46496	1.87913		3.10769	3.65393	3.13515
	ydiK	U00096.3:1769073-1770186		10.5351	13.633	13.9066		11.3459	10.7364	12.5907		11.2959	13.0633	14.4237		9.91389	5.95163	4.2851		9.4683	4.31102	4.75544
	rprA	U00096.3:1770371-1770477		33.5924	129.732	0		0	78.9945	283.354		352.799	66.1967	325.384		115.335	34.3523	190.077		272.368	36.7125	52.4655
	ydiL	U00096.3:1770614-1770971		4.21714	2.98107	0		0	0	0		0	0	0		0	0	0		3.91947	1.06316	0
	ydiM	U00096.3:1771070-1772285		0.175146	0.0553359	0		0.18685	0	0		0.436902	0.47373	0.887522		0.89488	0.375563	0		0.310238	0.623986	0.0759553
	ydiN	U00096.3:1772511-1773777		0.11253	0	0.378258		0	0	0.238259		0	0	0.397463		0.506993	0.501758	0.95498		0.951029	0.765603	0.256804
	ydiB	U00096.3:1773788-1774655		0.355905	0.992581	1.80336		1.30275	0.753131	1.1818		1.15649	2.54511	3.33931		7.25594	3.44209	2.3866		6.08308	4.79277	2.35265
	aroD	U00096.3:1774685-1775444		2.5935	8.41397	12.4599		8.55245	5.83224	6.29871		14.3188	7.51088	12.0763		9.95721	8.50876	9.11953		11.4999	7.88809	6.48624
	ydiF	U00096.3:1775586-1777182		0.493475	0.323561	0.26182		0	0.525768	0.338959		0.129203	0.275685	1.78471		0.485753	0.80282	1.47179		1.83939	0.710628	0.532671
	ydiO	U00096.3:1777195-1778347		0.114604	0.205462	0.742467		0.212623	0.236473	1.3814		1.639	1.63005	0.665585		1.90884	2.01083	2.31849		1.8963	2.85972	2.02252
	ydiP	U00096.3:1778389-1779301		1.25726	2.83896	1.05159		4.90999	2.22489	2.25082		0.302252	1.92767	3.96939		2.56089	0.60472	1.23196		2.07572	1.56643	0.673423
	ydiQ	U00096.3:1779616-1780381		0.290012	0.471925	0.378897		1.10501	0.240195	0		1.64857	0.940144	0.732757		0.524593	0.146723	0.764696		1.08986	0.508214	0.519512
	ydiR	U00096.3:1780400-1781339		0.299321	0.472544	0.661729		0	0.381754	0.634736		2.76127	1.82408	0.433192		4.11867	3.73993	0.783964		1.58692	1.58154	1.36395
	ydiS	U00096.3:1781394-1782974		0	0.33968	0.157391		0	0.0903749	0		0.244714	1.6509	1.65678		1.12676	0.981144	0.905027		1.50502	0.702652	1.28977
	ydiT	U00096.3:1781394-1782974		0	1.59333	0		0	1.39165	0		0	0	5.49728		0	2.85753	3.11746		2.48441	0.637243	0.741854
	fadK	U00096.3:1783030-1784677		0.0696212	0.23658	0.770511		0.272126	0.0594855	0.300745		0.143623	0.137688	0		0.750755	0.553114	0.489588		1.17214	0.319742	0.428568
	ppsA	U00096.3:1784733-1787112		32.516	16.5178	11.4699		23.0418	23.1457	18.9583		32.0633	22.9468	26.1923		39.0468	32.1271	23.5405		29.7536	30.402	24.2002
	ppsR	U00096.3:1787444-1788278		6.48302	20.6718	11.7717		10.2396	9.54242	11.5049		6.79866	8.48293	11.4031		8.99263	8.20653	2.74345		8.27941	4.89352	6.71508
	aroH	U00096.3:1788434-1789481		7.43599	11.4268	12.0118		14.3008	11.863	27.1375		48.7918	13.0577	24.3513		28.1034	25.1256	22.3039		26.6361	13.3158	17.0493
	ydiE	U00096.3:1789612-1789804		47.7737	48.3429	6.45407		9.62774	34.0747	42.8577		0	0	0		0	0	0		6.75209	0	0
	ydiU	U00096.3:1789807-1791244		4.79509	5.90238	4.07388		4.06969	5.42566	2.79196		3.24258	4.0608	1.61307		5.78484	4.14645	2.43594		5.00687	2.87934	3.13345
	ydiV	U00096.3:1791306-1792020		4.27828	5.36318	3.50341		4.14409	5.2949	6.2077		3.46045	5.70616	4.56303		5.09099	1.4175	3.02784		3.8575	1.76495	1.41509
	nlpC	U00096.3:1792266-1792731		27.5281	36.9349	27.2061		20.8823	15.4649	14.9065		17.6457	10.6509	11.8607		14.1162	15.8471	26.2103		20.181	17.6669	22.3732
	btuD	U00096.3:1792808-1794109		5.07537	6.03667	7.05686		4.67098	5.14624	10.1375		17.4765	16.3122	13.0072		21.929	17.409	11.7497		23.6069	14.0451	19.4209
	btuE	U00096.3:1792808-1794109		10.9743	14.7345	16.2567		16.472	19.1228	30.7754		34.5547	22.0385	19.5963		32.151	26.716	34.1119		42.4189	33.0451	20.0879
	btuC	U00096.3:1794171-1795152		6.30959	3.51051	5.78172		5.33913	6.13662	4.60671		5.82529	2.36217	4.8955		2.26798	4.11435	2.84472		4.22643	3.3416	3.37825
	ihfA	U00096.3:1795252-1795552		145.399	114.666	124.085		109.925	119.84	175.137		62.3608	76.9263	164.01		67.0024	165.671	126.563		121.76	80.1401	64.3813
	pheT	U00096.3:1795556-1797944		47.6472	34.7279	31.4468		56.414	63.6749	63.5047		76.4019	51.2459	63.1998		51.9511	62.4558	40.3315		51.0508	42.39	39.0384
	pheS	U00096.3:1797958-1798942		65.6478	57.5802	54.4835		75.9618	79.3693	134.383		248.216	132.793	91.5014		131.182	84.1054	52.7342		79.4866	51.5257	59.0161
	pheM	U00096.3:1799225-1799270		0	0	0		0	0	0		0	0	0		0	0	0		0	0	0
	rplT	U00096.3:1799392-1799749		1560.62	1163.16	842.052		1172.09	1188.68	1799.56		2081.36	1761.38	1675.81		1066.79	1279.6	1269.61		1110.85	769.04	721.605
	rpmI	U00096.3:1799801-1799999		13109.8	14009.2	8491.9		9445.95	14430.7	22279.7		17247.3	28830.4	20859.5		12754.5	13202.8	12222.6		14094.7	11216.8	7333.06
	infC	U00096.3:1800095-1800638		2181.11	1223.71	1321.49		1510.11	1868.1	2562.2		2114.14	1763.58	2875.3		2132.11	3485.99	2664.18		1674.2	1325.02	1392.66
	thrS	U00096.3:1800641-1802570		228.708	179.38	140.371		273.531	238.43	309.465		334.417	281.951	297.044		229.144	197.939	216.518		223.342	173.344	160.365
	arpB	U00096.3:1803093-1804993		0.418783	0.113089	0		0.181352	0.0809134	0		0.191128	0.405045	0.137432		0.978989	0.0931901	0.848983		0.34309	0.614246	0
	yniD	U00096.3:1805164-1805272		0	47.1699	0		0	0	0		0	21.6435	0		0	28.7427	0		111.171	0	0
	ydiY	U00096.3:1805324-1806083		10.2236	4.4289	2.97732		17.3338	20.7735	27.8585		35.0684	18.1789	28.581		34.4644	17.8947	17.4352		27.0226	10.8399	10.2
	pfkB	U00096.3:1806369-1807299		7.51903	8.74914	11.9155		11.8641	10.9441	17.1319		18.3117	7.88629	10.1722		8.61543	9.47511	5.82951		9.02764	3.24065	8.26447
	ydiZ	U00096.3:1807399-1807690		0.802365	3.3483	4.31481		5.77265	8.36929	6.94864		2.11711	10.4428	14.7068		5.29657	12.1564	5.90507		13.5567	7.13322	10.0244
	yniA	U00096.3:1807795-1808656		8.04979	14.9393	10.7213		11.7398	9.06152	4.91855		22.3058	14.7375	11.5533		15.536	6.74297	3.88606		11.8065	10.4236	7.70068
	yniB	U00096.3:1808696-1809233		17.2226	34.9458	23.4133		16.4217	14.435	15.9499		3.78541	14.9173	13.3619		16.1787	2.42413	11.7501		7.84583	8.96692	4.43379
	yniC	U00096.3:1809379-1810048		10.4705	21.3538	18.6998		15.1844	11.3867	27.5226		29.4919	11.6207	17.1155		8.2429	8.52497	7.28345		13.6977	6.27369	9.44383
	ydjM	U00096.3:1810210-1810801		2.96319	3.08626	6.61766		1.53987	2.91701	2.93607		2.20516	3.38158	1.61096		6.39204	1.38107	1.65204		3.68163	4.93114	2.93368
	ydjN	U00096.3:1810933-1812325		2.5168	3.53892	2.89632		2.602	2.69117	2.51527		1.55588	2.14032	1.81101		4.27639	1.98628	1.46259		1.73974	2.08255	0.739125
	ydjO	U00096.3:1812328-1813132		0.153273	0	0.294651		0.280476	0.105107	0		0	0	0		0	0	0		0	0.0936052	0.233542
	cedA	U00096.3:1813420-1813663		28.2867	14.7731	39.2109		41.1198	2.26838	31.0001		22.1038	12.1854	9.14123		18.0954	21.9807	8.09724		33.7266	0	12.0843
	katE	U00096.3:1813866-1816128		0.0859287	0.594165	0.593054		0.860181	0.973756	1.16843		0.674688	2.5925	2.09828		2.27592	1.47418	1.73892		1.62212	1.46163	2.02751
	chbG	U00096.3:1816385-1817135		3.17612	6.48529	5.50939		4.39988	5.105	6.08629		5.43918	7.88197	9.56869		9.6312	6.58696	10.303		11.7134	14.092	12.4187
	chbF	U00096.3:1817147-1818500		1.60478	0.86021	0.576649		0.517748	0.496388	0.787062		1.86656	1.43958	3.87169		3.40755	2.46312	3.2586		7.93008	7.47044	5.53105
	chbR	U00096.3:1818604-1819447		1.48617	3.10091	1.87059		1.94477	1.38803	2.27184		6.56448	8.03563	8.16755		9.48799	8.29764	8.21174		21.6734	14.7983	13.6629
	chbA	U00096.3:1819454-1819805		10.8417	17.0288	14.4291		6.63104	14.1638	16.9357		17.8886	60.9393	48.9994		56.5626	37.5918	61.9964		56.1112	71.8629	60.343
	chbC	U00096.3:1819855-1821214		0.591079	1.40041	1.47984		1.24885	1.11983	2.59756		7.02829	9.11281	5.9302		17.3044	9.84008	13.0266		15.5522	17.0506	11.2498
	chbB	U00096.3:1821298-1821619		4.16048	8.65038	5.85612		0	4.34431	17.2827		8.38144	13.719	7.79832		9.95554	12.0095	39.8347		42.6975	20.7776	17.7917
	osmE	U00096.3:1821917-1822256		17.1348	37.2994	31.8087		24.0328	31.3377	36.2326		5.43277	23.3457	16.5055		14.167	2.41029	6.09845		3.39924	5.64002	9.94671
	nadE	U00096.3:1822457-1823285		20.7336	46.0012	31.917		25.9268	21.375	30.2333		18.2856	14.9604	15.8668		11.4905	13.2018	5.00064		10.0604	13.947	14.9968
	cho	U00096.3:1823514-1824937		0.819973	1.79584	1.82624		4.84012	1.5968	2.35875		1.68413	2.59582	4.62032		3.14294	1.12188	1.71774		3.26485	1.00917	1.37395
	ves	U00096.3:1823514-1824937		0.509059	0.171008	0		0.498818	0.498237	2.51104		9.78636	7.24281	11.9575		5.85662	6.80016	4.12271		6.10831	5.64694	4.58337
	spy	U00096.3:1825139-1825625		19.3421	8.30573	8.97477		8.94582	8.12335	17.2761		23.6322	15.793	7.75854		12.2405	12.539	12.7506		12.624	13.2778	15.6221
	astA	U00096.3:1825954-1831982		0	0.0840145	0		0.252991	0.112191	0.289229		0.346542	1.14779	0.3943		0.569916	0.92156	1.53282		1.25834	1.76531	2.36995
	astB	U00096.3:1825954-1831982		0.41173	0.0738268	0.983755		0.609591	1.04993	1.17764		5.18117	7.15693	6.73892		5.69458	10.1231	6.66491		6.68141	6.4766	7.64656
	astC	U00096.3:1825954-1831982		0.345465	0.382369	0.373817		0.445464	0.215099	0.26981		1.98084	0.590067	2.5704		0.488294	1.651	1.74336		1.50179	2.71551	3.06131
	astD	U00096.3:1825954-1831982		0.392406	0.435606	0.157208		0.369467	0.266841	0.209307		1.15116	2.47203	2.21799		0.720076	1.50354	1.02509		1.36392	0.844494	1.27663
	astE	U00096.3:1825954-1831982		0.287127	0.601475	0.165705		0.200224	0.157141	0.235744		4.70747	1.58083	2.18652		4.5927	6.12376	1.25059		3.84907	1.37846	3.00093
	xthA	U00096.3:1832427-1833234		16.9508	17.0903	14.7031		15.192	18.2876	20.9797		14.389	10.2555	17.7119		9.59883	10.0616	10.9372		15.4025	7.06874	11.054
	ydjX	U00096.3:1833400-1834111		0.487544	0.333911	0.215543		0.333418	0.137594	0.370731		0	0.406966	0		0	0.163131	0		0.265989	0.738449	0.149882
	ydjY	U00096.3:1834115-1834793		1.17584	3.98834	2.28555		3.84668	0.822694	0.546072		3.90195	2.39345	4.39355		4.85042	3.3054	5.68511		5.37427	4.01079	1.37238
	ydjZ	U00096.3:1834807-1836063		0.610018	1.01903	1.26545		0	0	0		0.626724	0.601254	2.518		1.54742	1.02741	1.08882		3.17757	0.566075	0.209118
	ynjA	U00096.3:1834807-1836063		0	0.755777	2.07569		0.571166	1.85911	1.64423		2.10294	0.771307	1.79265		5.12264	2.23931	1.25625		1.36706	0.241951	2.33761
	ynjB	U00096.3:1836072-1839400		1.36337	2.03375	1.4869		1.96754	3.36421	2.76045		0.781778	0.532478	1.12984		3.2171	1.51165	1.35023		1.88489	1.30578	1.69685
	ynjC	U00096.3:1836072-1839400		0.428833	0.593429	0.767675		0.679341	1.18862	0.12627		1.1347	0.499999	0.567212		0.647465	0.409739	1.17987		0.513837	1.21435	0.752466
	ynjD	U00096.3:1836072-1839400		0.382184	3.75905	3.03721		1.93516	1.79706	1.79614		0.450673	0.511087	1.29725		2.24027	1.84613	0.845916		0.943833	1.39915	1.9259
	ynjE	U00096.3:1839466-1840774		0.750084	0.914581	1.07626		0.361464	0.463958	0.838286		0.654931	0.414151	0.581265		0.909687	1.35132	0.128903		0.608458	0.939496	0.76886
	ynjF	U00096.3:1840782-1841403		2.17714	2.51642	2.80444		1.41627	0.780244	2.48612		0	0	2.37058		3.99056	0.253193	1.49281		2.07149	0.554134	1.15152
	nudG	U00096.3:1841489-1842135		3.31761	2.13145	7.81449		1.60925	3.23908	9.35954		11.3282	1.26927	3.5149		2.49105	1.22944	5.07368		7.54056	1.18088	1.55738
	ynjH	U00096.3:1841489-1842135		2.55255	9.90203	1.39683		9.969	4.53671	0		3.25008	9.53392	0		2.21368	7.00203	8.36659		21.8163	13.6025	17.9372
	gdhA	U00096.3:1842370-1843714		5.68346	23.4899	20.6934		11.0936	8.84283	5.13032		9.3215	4.58135	12.9953		8.09117	9.29	8.47751		12.8778	13.9798	10.1824
	ynjI	U00096.3:1843830-1844871		2.12568	2.09515	1.09145		1.40523	0.482842	1.13642		1.52262	1.45613	0.392024		2.63819	0.699453	3.20434		2.17443	1.77352	1.77657
	topB	U00096.3:1844998-1846960		14.0577	14.0596	11.5631		16.1503	16.2156	15.8403		16.7587	9.05518	13.4827		7.91161	8.03872	10.0607		10.0166	7.75419	5.52119
	selD	U00096.3:1846964-1848008		34.4544	40.8833	37.7124		36.0378	27.0821	25.6143		10.0935	5.52074	22.173		7.73579	19.0182	15.5282		14.9345	12.5865	11.5049
	ydjA	U00096.3:1848124-1848676		9.16816	28.7168	21.6804		17.0363	12.5578	20.0484		12.9161	5.20452	14.2202		5.28111	10.0116	8.29622		14.1005	6.90436	11.9475
	sppA	U00096.3:1848836-1850693		9.8222	12.7282	12.612		10.0748	12.13	8.17686		4.00346	3.85527	6.47732		6.36038	5.94903	6.03079		6.59369	5.96523	3.64525
	ansA	U00096.3:1850859-1851876		14.7169	11.8421	9.84597		15.4461	24.3292	18.8782		15.4724	8.4516	15.4789		10.7894	11.0236	5.78832		10.5474	12.6797	9.53889
	pncA	U00096.3:1851886-1852528		16.0729	14.0679	10.2642		18.9011	24.2325	31.3081		33.2664	19.6825	22.5857		25.9507	15.4697	15.1128		16.3688	14.0222	11.9428
	ydjE	U00096.3:1852620-1853979		0.811855	0.703808	0.143214		0.327643	0.284044	0.192764		0.669615	0.618864	0		0.93548	0.0954144	0.131981		0.592069	0.925821	0.773687
	ydjF	U00096.3:1854095-1854854		17.2286	8.95708	11.4096		3.86523	4.26683	8.11434		7.40449	7.59238	6.43806		6.90377	7.58529	13.447		14.2692	12.069	9.00764
	ydjG	U00096.3:1854990-1855971		0.817856	1.24113	1.49598		2.37309	1.22527	2.87219		3.51864	2.53501	9.6044		6.82997	8.27299	9.37569		8.18661	6.07088	4.48952
	ydjH	U00096.3:1855980-1856928		0.584197	1.68401	2.57914		1.39683	2.26276	1.89881		1.92172	3.58051	3.16517		9.08724	3.86668	3.15453		4.76069	8.32431	4.72056
	ydjI	U00096.3:1856932-1857769		0.370799	2.61477	1.14531		1.43657	2.85407	1.35667		2.17268	4.13357	1.70763		4.36486	4.75541	4.45416		7.40159	7.9654	7.51798
	ydjJ	U00096.3:1857789-1858833		0.453162	1.14356	0.797046		0.78865	0.206295	0.635451		1.27411	1.54321	1.97124		1.71375	3.00548	0.994322		4.25905	3.26676	3.32074
	ydjK	U00096.3:1858849-1860229		0.2771	0.630844	0.436088		0.183399	0.265126	0		0.420938	0.89747	0.913102		0.545789	0.522023	0.574002		0.453356	1.30798	0.826107
	ydjL	U00096.3:1860255-1861332		0.152979	1.39934	0.752581		0.269822	0.261541	0		0	0.591609	0		0.76121	0.305593	0.794192		1.08194	0.310845	0.708274
	yeaC	U00096.3:1861701-1861974		75.5777	129.981	77.7144		22.6902	19.5465	79.8866		34.1633	32.5021	32.0214		17.7514	82.7789	80.8921		91.1676	35.212	121.486
	msrB	U00096.3:1862015-1862429		76.6007	97.4929	63.3848		32.3071	46.6288	50.2001		53.9141	70.9452	48.8129		48.0746	60.1179	71.6432		84.6019	72.1754	73.0101
	gapA	U00096.3:1862770-1863766		669.437	952.895	722.995		839.783	883.688	890.913		966.309	750.058	574.01		1050.96	823.098	629.386		869.957	849.037	668.13
	yeaD	U00096.3:1863849-1864734		20.7648	28.0994	40.0237		32.9373	28.0144	27.4446		42.7513	18.0923	11.3944		16.9916	22.6588	17.8231		23.3159	19.1449	18.0397
	yeaE	U00096.3:1864781-1865636		5.55181	8.90439	5.28924		6.32105	8.99689	8.12306		3.10254	5.71175	2.38762		4.15055	2.43088	6.4554		2.23218	4.59715	1.47066
	mipA	U00096.3:1865725-1866472		157.136	156.523	141.745		130.19	159.6	189.697		181.877	155.914	223.644		136.196	166.99	137.061		145.538	102.553	106.847
	yeaG	U00096.3:1866907-1868842		0.837858	1.57854	0.87951		1.17314	0.865628	0.394582		1.30653	1.54406	0.337621		1.53893	1.06802	0.903026		1.90337	1.8411	0.96281
	yeaH	U00096.3:1868954-1870238		0.991104	0.591743	0.764622		0.396476	0.65601	0.240408		1.09709	0.614412	2.12502		1.16402	1.60313	1.32299		2.12799	0.997386	1.05832
	yeaI	U00096.3:1870384-1871860		0.18416	0.491444	1.04152		0	0.0473757	0		0.154335	0.388226	0.477901		0.142608	0.214149	0.489591		1.31827	0.539094	0.152941
	yeaJ	U00096.3:1872040-1873531		5.01696	4.509	5.43919		5.83642	6.78702	6.95477		7.42203	9.2246	8.4951		12.2915	5.62703	14.2738		11.8622	9.0568	4.92765
	yeaK	U00096.3:1873573-1874077		7.32335	11.624	6.23629		7.59	6.88978	15.0837		13.3086	4.09304	4.59763		7.11748	9.00834	9.38915		4.89802	6.27421	8.76715
	yoaI	U00096.3:1874077-1874182		0	0	0		0	0	0		0	0	0		0	0	23.0737		0	0	13.6798
	yeaL	U00096.3:1874351-1875576		2.7622	3.02022	2.54994		4.35349	5.21953	5.76846		8.60503	3.02315	4.72875		6.32665	5.69727	1.66475		3.33902	1.41702	1.43687
	yeaM	U00096.3:1874351-1875576		3.42842	3.79848	1.54828		2.47866	1.52514	3.24078		3.02412	2.7127	5.41768		2.57761	2.76167	6.55838		6.1408	3.10403	2.88178
	yeaN	U00096.3:1875672-1876854		1.57115	1.75362	1.69113		0.236646	1.49738	1.49392		0.889737	0.292343	2.62717		0.53848	0.632354	0.498284		0.56998	0.709072	0.616282
	yeaO	U00096.3:1876908-1877256		2.09474	8.21471	5.94795		5.9708	3.06963	0		0	0	0		2.03583	3.6976	0		0	1.62966	1.34347
	yoaF	U00096.3:1877277-1877532		10.9764	29.4124	15.7615		7.7332	15.3806	37.8782		73.4441	47.7926	59.9366		49.9329	72.5702	39.0418		100.699	29.6908	47.5605
	yeaP	U00096.3:1877714-1878740		8.24845	8.45072	8.59006		6.83099	13.195	15.1944		18.1102	9.25525	11.8181		14.1009	13.1443	6.12933		14.8114	8.22635	8.2096
	yoaK	U00096.3:1878772-1878871		0	0	0		27.4617	15.1007	0		0	0	0		0	0	0		53.3425	0	0
	yoaJ	U00096.3:1878873-1878948		1656.65	3508.75	1420.39		2088.49	1982.13	2129.21		260.31	1133.73	558.8		1170.36	2261.02	3102.22		3688.25	2746.63	878.448
	yeaQ	U00096.3:1879006-1879255		38.2396	32.8222	76.3443		92.6358	105.176	120.226		65.0706	44.0008	77.9119		31.7699	48.4992	34.5652		50.7898	15.5208	10.6809
	yoaG	U00096.3:1879402-1879585		5.72357	4.80272	17.9168		0	10.6002	0		0	10.7985	0		8.75959	11.4111	0		0	0	8.12766
	yeaR	U00096.3:1879588-1879948		4.20073	5.09474	4.91663		0	0.586373	1.74526		0.742096	0.471396	1.50395		0	1.80141	1.75085		1.40832	1.87008	1.48129
	leuE	U00096.3:1880120-1880759		6.41396	9.54983	6.05591		4.50375	6.08097	12.3297		5.50017	5.52326	5.76683		8.77924	6.20323	5.8128		9.77227	7.08952	6.13229
	dmlR	U00096.3:1880885-1881809		7.70155	5.98669	2.52145		0	0.954403	0.727219		1.94433	3.46456	1.02221		1.96532	1.28439	2.6225		5.5303	3.83322	4.1857
	dmlA	U00096.3:1881911-1882997		0.584114	1.43052	1.66902		1.19956	0.4037	0.943032		2.83796	2.87267	2.46148		2.98558	2.0688	1.65559		3.33424	3.65242	3.61404
	yeaV	U00096.3:1883187-1884633		0	0	0		0	0.175521	0		0	0	0.227607		0.344947	0	0.189747		0.352465	0.0645516	0.394315
	yeaW	U00096.3:1884664-1885789		0.297426	0.143094	0.627002		0.198654	0	0.21254		0.46778	0.494609	0.305009		0.435352	0	0.279663		0.490108	0.344365	1.01797
	yeaX	U00096.3:1885844-1886810		1.22772	2.04794	0.685232		2.4284	1.74197	0.953479		1.40688	4.13314	0.899915		0.289474	1.0153	2.73517		2.20669	2.06434	1.55183
	rnd	U00096.3:1886863-1887991		5.49945	6.16606	2.57521		10.6711	16.3999	11.1085		46.6546	60.2138	40.6126		67.8589	58.3863	28.4911		31.1669	33.4276	22.4002
	fadD	U00096.3:1888060-1889746		7.93769	4.19034	5.49943		11.9664	23.5108	27.4224		165.385	120.783	211.177		210.179	232.995	172.237		195.867	145.377	80.7348
	yeaY	U00096.3:1889950-1890532		27.4557	13.7946	32.381		86.7668	115.54	282.111		993.193	574.563	900.075		699.776	1038.26	824.772		1041.98	542.882	1145.56
	tsaB	U00096.3:1890571-1891267		16.6881	7.12104	7.46565		20.202	23.8364	22.2247		20.2455	14.0135	18.1125		14.7285	21.3336	3.51308		10.122	8.80884	10.1352
	yoaA	U00096.3:1891324-1893235		3.38926	3.14521	4.25198		3.13228	2.6444	5.7755		3.96132	2.67368	3.12801		3.28907	4.50402	2.25481		3.80829	2.52937	4.08548
	yoaB	U00096.3:1893366-1893711		34.6265	29.5563	44.0952		19.1278	32.9226	89.0816		93.6915	31.5956	38.9661		18.4677	31.0926	11.1273		31.5299	19.2115	31.8271
	yoaC	U00096.3:1894132-1894432		8.91815	7.4707	11.7526		11.1301	8.32866	12.485		9.127	10.8385	12.6037		6.17799	17.0745	10.2294		15.6931	0.494258	6.23617
	yoaH	U00096.3:1894551-1894731		0	54.0065	0		34.8809	34.601	26.98		94.9125	16.9021	19.6022		24.4983	25.879	0		34.9847	13.627	73.91
	pabB	U00096.3:1894804-1896166		5.75513	4.12654	4.14382		3.57336	6.84296	4.84152		4.33934	2.3727	1.28503		3.20333	1.7927	4.139		3.9924	2.70108	1.90958
	nudL	U00096.3:1896169-1896748		5.74789	5.34938	5.9537		2.2251	5.16393	10.5214		3.14723	5.04927	0.81329		3.84491	2.02971	4.85987		4.62792	3.18433	3.84216
	sdaA	U00096.3:1896931-1898296		25.2711	25.5386	30.4406		25.7182	27.9143	22.3992		21.856	21.94	21.3814		33.5436	31.1929	29.4137		37.5627	33.1561	27.0185
	yoaD	U00096.3:1898426-1900025		0.211043	0.142583	0.752183		0	0.184643	0.423157		0	0.152518	0		0.139841	0.918919	0.363424		1.72646	0.417177	0.538854
	yoaE	U00096.3:1900028-1901585		8.33737	8.11754	10.3076		6.86401	7.35911	8.70825		8.06423	7.92235	8.06394		14.099	9.02482	10.5296		18.2209	18.4734	14.0803
	manX	U00096.3:1902047-1903019		32.8832	54.647	40.5795		21.3155	20.848	18.6741		8.94545	7.99358	5.86118		8.25965	5.31267	8.47581		14.2907	14.9432	21.9096
	manY	U00096.3:1903081-1903882		55.213	109.818	60.2786		72.6445	66.9183	32.1059		16.6867	27.3678	23.8617		17.5524	9.25383	11.8925		18.855	31.0945	25.1372
	manZ	U00096.3:1903894-1904746		47.5638	92.3225	72.2732		64.123	44.2765	37.5628		37.8845	17.8182	25.67		13.5695	13.7669	18.4757		25.181	27.7284	34.7433
	yobD	U00096.3:1904800-1905259		17.6402	20.872	15.9343		4.0739	11.141	7.75831		9.69307	2.37142	12.2277		5.76288	1.09849	2.2653		4.59405	4.03936	3.43098
	mntP	U00096.3:1905687-1907060		1.73423	0.28329	1.98822		0.888636	2.1111	2.00964		3.18649	1.24923	1.59536		3.29334	6.3653	6.94133		4.54453	4.17551	1.98839
	rlmA	U00096.3:1905687-1907060		7.79925	7.51665	5.52351		7.28937	11.8948	9.79689		4.56028	10.307	13.7327		12.4591	7.76958	4.88896		8.82439	8.43779	5.69095
	cspC	U00096.3:1907225-1907435		2489.22	4830.88	4739.87		2450.35	3088.83	3171.58		2057.84	1842.44	2453.27		1461.07	1211.67	2479.46		1968.83	1134.09	1219.88
	yobF	U00096.3:1907447-1907591		4527.53	9951.84	6077.72		3069.34	4281.62	3097.55		1174.46	7593.14	2897.18		2960.97	1712.45	2600.72		1794.73	3974.82	1362.99
	yebO	U00096.3:1908260-1908548		58.1551	68.7442	32.8227		71.3775	102.415	199.956		143.848	102.261	76.8596		93.909	102.826	86.3355		97.8287	40.5219	56.8026
	mgrB	U00096.3:1908622-1908766		263.938	121.176	179.166		224.184	265.062	268.935		32.0798	201.567	348.067		106.739	376.188	303.122		476.789	55.5699	217.735
	yobH	U00096.3:1908924-1909164		40.1853	37.0543	93.0837		40.0397	43.3217	54.2905		30.6123	45.676	47.874		28.6289	38.8536	46.8907		40.9571	18.2153	28.9358
	kdgR	U00096.3:1909307-1910099		34.6634	24.5536	21.4577		19.3839	23.1941	25.0138		13.1796	11.8078	19.0472		14.4857	16.0196	19.408		18.728	16.7358	16.5452
	yebQ	U00096.3:1910275-1911649		0.629132	1.2385	0.366973		0.667641	1.48201	0.799674		2.6041	2.15836	0.218936		0.993475	1.32682	0.19294		1.67031	0.805087	0.417439
	htpX	U00096.3:1911694-1912576		46.9114	99.1114	114.924		86.8106	73.2628	57.1971		63.0832	51.4502	61.6523		292.32	247.052	233.938		219.396	167.468	179.717
	prc	U00096.3:1912767-1914816		30.7331	30.2904	28.275		46.7456	43.8079	50.2545		22.0874	27.9234	24.1789		26.9466	31.6229	23.8053		26.8522	27.1027	21.4144
	proQ	U00096.3:1914835-1915534		110.077	85.7246	98.156		101.431	108.675	152.327		74.9089	99.2549	94.6928		66.832	62.8869	77.5151		60.9724	62.2128	45.9389
	msrC	U00096.3:1915630-1916128		82.2377	80.2834	143.328		74.5015	67.6487	66.702		14.3154	13.6343	20.5725		21.8437	20.4783	18.8602		38.474	41.3107	20.1503
	yebS	U00096.3:1916257-1920143		1.73995	2.50916	2.881		1.9154	1.91202	2.65922		3.87513	0.900776	1.77402		3.01889	1.55038	2.10682		1.68339	1.43248	0.827501
	yebT	U00096.3:1916257-1920143		4.33221	3.86847	3.69786		3.87219	3.93747	5.04287		3.01924	1.98585	4.00631		3.1455	3.04915	3.70996		3.00803	2.31539	2.37861
	rsmF	U00096.3:1920222-1921662		4.69836	5.53756	3.51472		7.87247	8.05458	6.72981		3.43859	5.24628	4.85181		6.57633	4.90432	5.01905		4.75698	5.62834	2.23948
	yebV	U00096.3:1921779-1922016		8.00596	6.7621	14.1483		0	18.4646	28.5342		14.6011	22.8875	10.1615		4.19306	7.00007	14.4703		15.2474	10.2757	10.2598
	yebW	U00096.3:1922120-1922312		37.474	30.7995	68.9332		21.7577	18.4599	0		16.1026	15.533	0		12.9431	6.75682	0		20.3441	13.8887	4.95661
	pphA	U00096.3:1922312-1922969		1.33328	0.263332	0.327058		0	1.59441	0.975836		9.06909	7.83696	7.90864		4.66547	8.70237	12.332		6.74692	3.10952	4.52041
	ryeA	U00096.3:1923065-1923314		1232.6	494.83	522.46		200.129	194.581	291.318		270.646	88.0505	177.664		232.072	399.542	389.566		2309.86	848.055	1919.31
	sdsR	U00096.3:1923065-1923314		0	0	0		0	10.2281	0		0	0	0		0	13.3813	17.9117		22.7	0	11.7148
	yebY	U00096.3:1923364-1923706		69.6843	105.693	107.112		115.066	87.3005	119.585		44.7977	61.4592	46.624		44.7932	45.2213	42.4106		67.5991	32.9059	34.0508
	yebZ	U00096.3:1923718-1924591		23.8308	24.0134	35.0437		25.4823	25.5256	32.0665		27.2009	11.3511	19.6356		15.3503	15.6442	10.6202		19.3851	14.4969	16.6648
	yobA	U00096.3:1924594-1924969		55.9831	168.64	104.279		94.0904	102.42	97.379		73.3937	110.603	52.7857		122.903	31.7373	40.8698		70.9338	62.884	37.2884
	holE	U00096.3:1925107-1925338		49.5722	25.6231	78.5939		54.1321	50.5687	63.5423		8.65234	44.06	13.8393		30.0674	20.7142	31.3373		43.1755	31.8089	6.74792
	yobB	U00096.3:1925439-1926096		7.56045	8.11857	3.49802		5.31461	3.07218	8.36777		24.3272	8.29777	5.32982		16.2654	8.85641	5.68701		6.92527	6.6342	6.41097
	exoX	U00096.3:1926119-1928839		8.3385	17.0429	12.5633		15.5384	2.44137	11.6696		5.33826	1.08793	2.85867		8.88347	5.61969	4.35066		7.51472	5.43169	4.22502
	ptrB	U00096.3:1926119-1928839		1.14348	2.02749	2.43355		2.05275	1.50631	2.26495		2.59316	1.4396	0.721306		2.14425	1.12165	1.35296		1.1205	1.48382	1.14099
	yebE	U00096.3:1929047-1929707		2.50995	4.38729	12.1491		4.57269	2.37494	5.60655		1.04763	1.4833	4.70688		2.8507	2.3623	4.67435		7.99131	3.51503	10.5596
	yebF	U00096.3:1930033-1930390		33.0104	46.7088	42.2663		43.6212	65.694	95.9909		68.1683	69.2879	48.064		67.8639	28.9034	36.4012		74.1445	40.4974	13.4252
	yebG	U00096.3:1930456-1930747		42.7839	46.7361	35.185		23.6493	24.969	36.5276		31.5979	32.7692	11.9906		16.2622	25.9182	19.321		44.5478	18.6141	24.0347
	purT	U00096.3:1930880-1932059		1.02248	0.868114	1.67498		0.20449	0.888143	1.60441		1.75598	0.238942	1.23392		1.2902	0.781555	0.409409		0.746936	0.159682	0.576552
	eda	U00096.3:1932114-1932756		46.7785	40.1882	19.7333		42.2406	26.9573	41.8831		38.9259	43.6837	31.7		30.0155	32.9083	20.8612		20.355	24.6213	22.991
	edd	U00096.3:1932792-1934604		6.46957	4.54161	5.17031		4.90958	4.29985	8.90017		9.6828	2.58602	4.59345		5.1477	5.42274	4.3999		4.73255	3.85043	5.87471
	zwf	U00096.3:1934838-1936314		32.1589	46.8624	39.6757		48.1721	40.2092	44.9447		29.6834	37.6067	23.3771		23.0562	17.916	17.4921		19.8055	18.5954	14.3051
	yebK	U00096.3:1936651-1937521		32.9364	24.5593	8.47872		6.26362	7.05823	7.14061		9.69941	8.78527	12.3378		13.8141	9.30825	15.0497		34.225	21.3501	21.9773
	pykA	U00096.3:1937648-1939091		56.7707	78.8081	71.9592		64.8676	47.9109	40.8384		51.3914	45.88	50.4662		52.035	78.317	59.6142		68.6034	64.7792	69.5598
	lpxM	U00096.3:1939221-1940193		16.2743	11.5416	14.4952		15.8404	16.2261	25.4185		61.4786	27.1318	105.335		61.2062	89.3751	76.031		98.5537	45.6014	61.9131
	mepM	U00096.3:1940312-1941635		19.493	26.1089	23.0876		29.0646	37.5373	67.6214		245.342	126.687	198.093		162.819	254.793	235.974		333.874	217.901	280.163
	znuA	U00096.3:1941650-1942583		74.1164	56.8172	58.5741		93.4168	91.7616	115.187		509.012	266.853	253.368		336.455	260.763	249.188		538.843	280.203	250.239
	znuB	U00096.3:1942661-1944199		4.45543	2.84945	3.87062		2.82978	8.24645	4.96413		1.76133	3.42542	4.33513		4.18109	1.64757	2.0861		1.26307	1.66843	1.28642
	znuC	U00096.3:1942661-1944199		6.81494	5.49896	2.90821		4.81978	4.97984	9.03634		3.28567	6.38164	3.54128		3.15576	6.8715	4.54959		5.71292	4.0292	4.01347
	ruvB	U00096.3:1944345-1945356		7.3744	8.53439	10.2168		6.11718	5.83587	8.79537		8.07042	4.90048	6.52402		8.23661	5.41984	4.29982		5.33365	10.1707	7.09283
	ruvA	U00096.3:1945364-1945976		13.4368	13.1608	10.585		7.47419	8.22646	15.4184		7.42392	6.55369	13.1669		6.81483	8.7558	12.0483		15.1546	9.73566	7.38029
	yobI	U00096.3:1946114-1946180		0	0	0		0	0	0		0	0	0		0	0	0		0	0	0
	yebB	U00096.3:1946250-1946853		0.614221	0.117592	0		0	0.132812	0.677544		0	0	0		0.809765	0	0		0.237881	0	0.419224
	ruvC	U00096.3:1946854-1947376		72.3771	49.3772	87.4641		69.8249	71.6393	193.286		352.803	124.22	214.569		180.102	245.983	173.639		146.851	85.3993	140.268
	yebC	U00096.3:1947410-1948151		106.409	69.5501	54.0411		90.4766	118.417	147.08		122.456	117.986	168.249		147.278	166.531	146.19		138.02	93.5692	130.531
	nudB	U00096.3:1948179-1948632		40.7338	17.5477	40.5809		46.873	45.6039	68.6845		30.1941	19.4377	62.5685		32.4491	54.8002	58.4163		62.2396	18.8252	35.4218
	aspS	U00096.3:1948749-1950522		48.9601	37.4192	26.1865		49.8405	64.9146	65.4956		54.4664	51.3343	56.039		60.8454	42.1184	34.4962		43.0609	42.9892	24.8314
	yecD	U00096.3:1950831-1952213		12.2975	25.8827	21.3167		15.3202	18.3534	27.1759		10.4815	6.05721	12.6971		5.046	5.69099	11.6512		6.66055	7.361	8.25833
	yecE	U00096.3:1950831-1952213		4.03971	6.59623	8.86121		5.19859	4.45551	4.6882		4.75106	2.67704	7.95654		2.28512	2.27351	1.70354		2.08396	3.07896	2.0427
	yecN	U00096.3:1952265-1952661		4.71968	1.96587	0.761627		5.22182	2.5821	5.41137		8.69291	4.88307	6.88359		4.31486	3.75751	6.81607		4.67355	1.99999	2.85042
	cmoA	U00096.3:1952701-1954413		13.1691	8.99019	11.1328		22.1601	18.9682	20.438		7.85074	11.6856	8.9277		19.5438	8.50357	8.34042		12.5434	8.79052	5.56301
	cmoB	U00096.3:1952701-1954413		13.714	5.17073	7.20406		17.2282	14.3858	17.3345		15.6113	7.91113	13.3295		12.7315	12.0378	12.2918		9.96689	7.01997	8.41982
	torZ	U00096.3:1954577-1957007		0.366191	1.16163	1.24451		0.619468	2.11439	1.93174		18.9017	16.1739	18.9002		16.4851	13.6817	12.4798		15.1848	12.8903	11.1498
	torY	U00096.3:1957031-1958132		0	0.607551	1.64299		1.38091	2.05614	4.38334		7.37192	8.99089	22.784		11.3863	10.2351	16.0183		14.4849	12.3252	8.88305
	cutC	U00096.3:1958519-1959266		12.1932	23.6557	14.7356		55.1425	79.6744	170.15		180.583	132.757	210.784		201.079	234.045	151.721		185.25	74.9123	114.069
	yecM	U00096.3:1959279-1959846		7.56586	13.0619	10.9311		5.16986	6.17157	8.04762		8.53342	3.01396	8.74266		8.90293	2.85458	6.89666		10.2746	4.2413	3.79805
	argS	U00096.3:1960061-1961795		40.696	21.6809	29.7845		32.1051	46.7129	46.7713		50.0625	29.5614	42.763		36.6772	38.5949	27.7754		32.0723	19.0391	22.2136
	yecT	U00096.3:1961971-1962460		0.832527	0.141234	0		0.777898	0.921288	0.884252		0	4.91961	3.81344		0.969439	2.45248	0		0.708618	1.94294	0.922511
	flhA	U00096.3:1962579-1966191		0.929161	0.683138	0.931248		2.29262	1.36985	1.57998		3.10039	1.96784	2.54254		4.37465	2.73416	2.1908		3.47308	2.93576	2.19555
	flhB	U00096.3:1962579-1966191		0.749762	0.218775	0		0.854445	0.406699	1.26522		0.867596	1.09902	2.30322		0.233903	1.05679	0.177213		0.574836	1.23125	0.923217
	flhE	U00096.3:1962579-1966191		3.49447	2.30079	0		2.50483	0	4.80873		0	3.8274	3.21343		2.28885	6.9922	1.0905		3.58666	5.75207	1.42399
	cheZ	U00096.3:1966392-1967037		0.490021	3.16106	0.895028		1.39034	1.50311	2.43009		17.1044	12.3502	18.3304		41.9582	16.4173	22.7007		27.7085	18.1134	13.1134
	cheY	U00096.3:1967047-1967437		0.9111	1.70603	4.46294		2.71498	2.92511	2.2962		49.604	25.0922	30.0106		51.3741	30.3932	22.3425		39.8887	27.8648	18.8134
	cheB	U00096.3:1967451-1968501		0.129248	0	0		0.24732	0.674784	0		2.39451	2.44281	3.59577		4.49743	4.17035	5.96609		3.50893	3.99797	2.06406
	cheR	U00096.3:1968503-1969364		0	0.255709	0		0.538707	0.243736	0.334468		1.92143	1.02393	1.29934		1.24803	1.86597	1.66544		0	1.55967	1.29861
	tap	U00096.3:1969382-1970984		0.178802	0.513	0.157469		0.872789	0.228393	0.912933		1.22527	0.449989	1.50094		1.41689	2.1529	0.760458		1.58984	1.66958	1.55632
	tar	U00096.3:1971029-1972691		0.217315	0.256956	0.779345		0.142335	0.200385	0.161451		0	0	0		0.434258	0	0		0.733006	0.421528	0.189542
	cheW	U00096.3:1972835-1973339		3.53744	0.886371	2.3747		2.79748	1.44488	1.4987		2.26267	1.68766	7.33141		5.11237	10.0882	13.1661		12.9126	6.87122	4.4762
	cheA	U00096.3:1973359-1975324		0.247088	0.659383	0.285228		0.228323	0.620868	1.05453		4.53535	3.24962	4.74242		3.83546	5.42233	5.47198		5.45278	4.76577	3.45018
	motA	U00096.3:1975328-1977139		0.132641	0.409255	0		0.770548	0.467737	0.263811		0.670705	0.597667	1.27382		0.577633	1.12415	0.184454		0.421521	0.484355	1.43544
	motB	U00096.3:1975328-1977139		0.329709	0.459678	0.21964		0	0.640515	0.331306		5.32702	2.53697	5.13009		4.131	1.69506	4.31683		2.26085	3.04486	3.84581
	flhC	U00096.3:1977265-1977844		8.08368	8.16973	3.99083		5.21141	1.54718	3.51441		1.00499	2.62927	3.02951		4.78732	3.43276	6.52454		14.333	5.83194	5.741
	flhD	U00096.3:1977846-1978197		3.25739	8.22365	14.2426		1.3357	6.38453	12.394		1.62676	0	8.16408		2.66438	6.86171	11.045		17.124	4.50201	4.52202
	uspC	U00096.3:1979752-1980181		11.6021	45.3969	16.3128		0	4.6651	2.99222		0	11.5536	8.6956		9.377	2.18803	4.95387		7.24524	7.60707	6.79196
	otsA	U00096.3:1980187-1982387		0.517401	2.66932	2.86286		2.48925	2.20763	1.62516		3.61684	4.86039	4.1979		6.22001	5.18841	4.68799		4.80577	6.65754	3.52932
	otsB	U00096.3:1980187-1982387		0.555998	2.12381	7.82368		1.70069	1.99955	2.23536		5.00336	6.37552	7.38252		5.74806	7.07671	2.80618		7.13338	4.1152	5.2041
	araH	U00096.3:1982553-1983540		0.403369	0.882093	0.194209		1.09446	1.41695	1.10313		3.44875	2.7567	2.36634		4.01198	2.97751	1.496		2.71967	4.7742	3.07343
	araG	U00096.3:1983554-1985069		0.160941	0.521491	0.644985		0.300475	0.490139	0.774741		4.12462	2.59829	3.19299		3.13361	2.88665	3.31256		3.3822	3.2223	3.36352
	araF	U00096.3:1985138-1986128		0.471565	2.59442	0.450391		0.54858	0.238581	1.3394		5.2782	0.624136	3.20876		3.90068	4.68504	5.36109		5.19535	3.51157	6.18737
	ftnB	U00096.3:1986924-1987428		22.3364	62.0997	37.909		19.7659	24.1171	26.9084		26.9611	13.7217	12.6431		22.9322	11.0938	20.8528		24.1831	11.7918	12.8211
	yecJ	U00096.3:1987506-1987758		32.4804	35.8451	23.4726		22.2409	48.0728	121.938		21.9331	69.3613	66.6477		46.8139	54.8476	33.1366		33.3529	23.5803	35.5679
	azuC	U00096.3:1987872-1987959		0	113.767	293.35		263.042	410.911	2091.26		906.739	1005.05	431.754		755.746	557.779	847.31		302.206	0	103.141
	yecR	U00096.3:1988221-1988545		3.63784	7.18888	3.14288		1.78495	6.8575	2.16736		9.10654	2.15842	0		7.76193	4.3937	0		1.52	6.97237	0.930648
	ftnA	U00096.3:1988715-1989213		30.4594	101.076	107.367		41.0389	54.1031	92.5204		56.65	52.9155	75.0271		80.4298	42.489	95.8514		106.486	60.0495	84.0723
	yecH	U00096.3:1989250-1989490		9.32134	47.3886	59.7663		3.75581	18.9656	10.0091		15.9762	0	6.78226		3.39005	6.8623	13.8843		19.0195	8.97257	7.46389
	tyrP	U00096.3:1989680-1990892		7.12654	3.04107	4.12951		6.55794	5.03198	8.01223		6.69066	3.85151	6.90102		4.54365	4.45839	5.86514		6.46162	3.40579	2.32994
	yecA	U00096.3:1990953-1991619		2.48781	8.55098	9.72138		7.17329	5.82259	12.3791		15.7111	7.3055	10.8751		9.46148	10.1807	4.31648		9.32387	4.64746	6.15572
	leuZ	U00096.3:1991814-1991901		93104.6	28652.8	23157.2		77501.2	138990	49369.9		29001.3	31436.2	69608.5		71382.2	35778.7	131622		47619.3	54130.9	22740.6
	cysT	U00096.3:1991913-1991987		111062	96219.5	152928		90401.7	138759	256944		286312	196373	340987		163547	138320	223117		188199	160993	127442
	glyW	U00096.3:1992041-1992117		20810100	18133600	18554100		14386900	10370600	27853500		44417200	29176900	24513700		22602100	43635000	43586100		16589300	27832600	63943300
	pgsA	U00096.3:1992268-1992817		22.0968	17.9154	18.3736		18.963	11.3815	12.4834		7.41142	12.09	8.16477		16.1872	10.2562	9.90312		14.842	12.5615	7.20798
	uvrC	U00096.3:1992873-1995359		10.263	13.1869	15.6653		12.3305	12.5513	14.6477		9.53939	7.7641	13.2316		13.2911	14.231	11.4933		16.7003	17.7049	13.3632
	uvrY	U00096.3:1992873-1995359		49.0091	42.1558	47.2293		47.4541	34.8853	41.1034		20.2394	24.6814	24.7728		34.7003	37.8249	32.3668		47.3492	28.5086	36.1438
	yecF	U00096.3:1995817-1996042		368.41	188.991	93.4142		142.343	184.993	402.017		144.413	294.126	290.454		265.146	284.905	236.094		207.552	148.61	254.6
	sdiA	U00096.3:1996109-1996832		15.9023	25.7523	25.587		11.6837	15.9872	9.4147		6.66808	8.25727	14.2102		13.4462	7.2354	16.1075		13.8116	10.9722	8.71223
	yecC	U00096.3:1997061-1998479		2.10925	4.19491	3.35936		4.50303	1.84934	2.10327		5.91182	3.93781	3.56418		4.96441	7.43253	2.37252		6.01448	3.4889	5.14675
	yecS	U00096.3:1997061-1998479		2.14399	2.07659	1.78901		3.67055	4.40731	3.53		2.55303	2.14906	3.03442		5.0838	2.21462	3.07274		4.27669	5.87286	3.11416
	dcyD	U00096.3:1998493-1999480		2.30754	3.77572	3.41552		3.65003	2.6585	4.53447		5.1618	2.218	2.5588		4.2988	6.9197	5.00479		4.12415	2.46143	4.32311
	fliY	U00096.3:1999584-2000385		8.25914	19.0775	16.8755		17.8485	7.25251	11.4266		15.054	8.93097	3.46862		13.4793	15.0412	14.4326		16.409	6.45692	14.5693
	fliZ	U00096.3:2000472-2001024		3.33953	2.91756	3.29839		1.02473	1.49807	1.25571		8.86894	2.41721	0		2.17581	0	1.14457		2.37262	1.81566	1.69943
	fliA	U00096.3:2001069-2001789		3.4069	4.82763	2.51579		5.49134	2.79875	3.61288		4.85069	1.73252	3.36455		2.12549	0.951715	1.0846		0.958586	0.739406	1.80865
	fliC	U00096.3:2002109-2003606		2.19101	4.61594	4.28549		7.24479	10.737	11.9839		47.2722	64.966	112.903		118.095	70.8973	107.559		82.1638	83.7867	51.763
	fliD	U00096.3:2003871-2005278		0.345234	0.522322	0.381798		0	0.212337	0.709259		1.38595	0.201506	0.976869		0	0.206159	0.4397		0.779207	0.678133	0.175396
	fliS	U00096.3:2005302-2006078		1.83675	1.14735	1.38954		0.842643	2.44929	0.732478		6.49324	1.15724	5.88011		2.33999	2.47224	7.77821		3.53181	0.791586	1.91027
	fliT	U00096.3:2005302-2006078		0	0.384598	0		0	0.399814	7.68595		6.88887	2.39491	0		4.78461	1.6778	0		8.48549	2.52445	6.05263
	amyA	U00096.3:2006155-2007643		1.22185	1.29447	2.78072		2.95696	2.53502	5.88753		6.97614	6.09628	4.39129		6.35765	6.54434	4.57305		5.55654	3.73138	4.61717
	yedD	U00096.3:2007676-2008090		84.0809	39.6484	82.184		89.7094	76.214	106.077		49.9857	24.6195	73.334		24.6852	68.8548	53.3405		42.2449	30.7102	49.0505
	yedE	U00096.3:2008276-2009712		20.2884	10.7482	7.44057		7.10355	4.88881	6.69369		9.25506	6.1055	3.65049		6.71336	8.23445	7.46201		12.7268	13.8231	15.6132
	yedF	U00096.3:2008276-2009712		21.7655	13.2068	1.55661		13.1839	1.42282	8.52718		9.75228	10.472	0		16.0889	40.1901	13.2745		17.5983	41.2431	39.9441
	yedK	U00096.3:2009820-2010489		1.07355	0.734224	0		0	0	0.506701		0.452962	0.958691	1.39332		0	0	0.895203		2.68435	0.177701	0.923306
	yedL	U00096.3:2010599-2011079		2.32781	2.7653	1.79167		0.877511	0.400479	2.25557		1.10076	0.984936	0		0	0	0.740886		1.61621	3.00839	1.80936
	yedN	U00096.3:2011222-2012351		0.337875	0.0820696	0.16961		0	0.292831	0.237595		0	0	0		0	0	0.958984		0.341133	0.467152	0.265384
	intG	U00096.3:2012501-2012663		0	0	0		0	5.20614	17.6824		0	7.52227	92.5806		17.8122	16.6347	7.64525		11.5061	0	23.9151
	fliE	U00096.3:2012699-2013014		10.8876	5.36798	3.81043		1.94339	7.3182	2.14487		1.87446	3.24162	13.6543		2.44589	2.88707	1.05156		1.57332	3.99537	3.4422
	fliF	U00096.3:2013228-2017927		2.98269	1.79873	2.11473		1.8724	2.06041	2.72928		2.03361	1.41464	0.700624		1.77772	1.68785	1.0394		0.612384	0.714387	0.692718
	fliG	U00096.3:2013228-2017927		2.5972	1.9597	5.48448		4.47289	2.6383	4.10363		4.70084	3.58523	2.88898		3.52898	2.89377	3.74069		3.40766	3.63784	3.19017
	fliH	U00096.3:2013228-2017927		1.59923	1.64783	3.52269		1.31941	1.56504	3.06355		3.68065	4.29015	4.9228		2.90691	2.37126	4.32786		2.7291	2.32963	4.00923
	fliI	U00096.3:2013228-2017927		0.924841	0.755909	0.919847		1.51775	0.70564	0.61306		2.34812	0.456614	2.554		0.767963	0.665737	0.36204		1.66187	0.626111	0.834915
	fliJ	U00096.3:2017945-2019513		3.9229	1.1427	4.7126		6.00268	2.72342	3.50227		12.3457	2.48495	2.96656		2.00748	10.2134	4.7943		11.1118	2.80115	7.51711
	fliK	U00096.3:2017945-2019513		0.703116	1.52153	0.587405		1.94774	0.484534	2.00104		4.32122	1.27522	1.89624		3.7845	2.2813	0.794677		1.78033	0.63704	2.86265
	fliL	U00096.3:2019617-2020082		4.13177	4.92539	4.35134		6.64213	6.25479	7.62146		5.62632	0.736864	8.37107		0.717268	2.18854	0.684743		1.55656	0.587289	3.84542
	fliM	U00096.3:2020086-2021501		4.03132	2.27892	1.98023		4.38349	2.12836	5.36303		5.40798	2.61398	2.9331		3.32193	1.3001	1.72331		1.80205	1.66742	1.95219
	fliN	U00096.3:2020086-2021501		1.8872	1.28284	1.58518		3.26935	1.69436	0.824434		2.60599	2.41712	1.41334		0	0.863667	2.51373		0	1.24928	0.974038
	fliO	U00096.3:2021503-2022606		3.13712	1.68838	0		5.78434	2.9619	2.59182		9.67948	0	6.78792		5.14313	4.43084	1.49414		5.50759	0.419771	2.15796
	fliP	U00096.3:2021503-2022606		3.46131	1.28152	0.492668		2.15849	1.62415	1.04796		3.90782	1.61469	0		0.623422	1.41571	0.373857		0.810458	1.29592	0.322095
	fliQ	U00096.3:2022615-2022885		4.4677	5.56562	0		1.90063	6.93543	4.40196		9.58672	11.5513	0		5.83682	1.31855	7.47824		9.00444	2.20086	2.21134
	fliR	U00096.3:2022892-2023678		0.152479	0.275387	0.85944		0.966047	3.17175	2.33513		5.77666	5.10587	2.88093		9.09077	4.5564	5.43695		8.1515	5.57164	3.28868
	rcsA	U00096.3:2023967-2024591		0.591116	1.40458	0.997283		1.67555	0.758976	1.40107		0	2.69171	0		0.488091	0.303703	1.49626		0.452438	0.666494	0.448533
	dsrB	U00096.3:2024634-2024823		73.977	132.87	70.959		102.319	82.5309	62.4258		0	33.055	27.8268		16.4411	39.8717	28.5035		105.958	15.3068	33.0193
	yodD	U00096.3:2024985-2025213		9.47687	15.7813	0		16.7817	0	7.17697		20.5044	52.1059	0		12.3239	7.68057	0		10.1978	15.1306	10.4841
	dsrA	U00096.3:2025226-2025313		217.939	983.019	915.14		770.777	329.389	585.841		0	333.248	0		0	352.102	600.751		1014.68	351.34	578.898
	yedP	U00096.3:2025510-2028017		0.849347	0.227774	2.0666		1.31629	0.295439	2.30676		2.43161	1.5166	0.554618		1.75115	2.46406	0.963923		2.70064	0.535975	1.86185
	yedQ	U00096.3:2025510-2028017		1.92654	2.71408	2.06762		2.53564	1.7452	1.43904		2.16157	1.83164	1.16193		2.15517	1.50375	1.06347		1.79036	1.1673	1.47858
	yodC	U00096.3:2028187-2028370		263.289	276.529	105.868		213.705	126.304	255.418		50.1173	70.3166	95.8864		83.571	107.988	124.434		182.524	72.2606	40.0662
	yedI	U00096.3:2028448-2029366		5.39404	4.54472	7.94712		3.9642	4.26944	6.64666		3.24613	3.01689	5.08033		1.7396	1.77736	1.05493		3.30601	2.10448	3.62859
	dcm	U00096.3:2029538-2032317		9.90614	5.34247	6.48067		6.70081	8.1233	9.82858		4.52467	3.93553	6.12146		6.17124	4.47827	3.78878		5.38082	6.36796	6.06427
	vsr	U00096.3:2029538-2032317		5.76926	6.45441	4.21991		5.6586	5.03998	5.58794		1.20728	1.18498	0		2.94704	3.51226	2.03919		1.91552	3.92424	3.01023
	yedA	U00096.3:2029538-2032317		0.429539	1.38003	2.15574		0.894845	0.265002	1.45307		0.364345	1.90793	0		1.03554	0.158953	0		0.25671	0.227912	0.215288
	yedJ	U00096.3:2032383-2033079		6.32331	4.49998	4.39126		5.56622	5.79516	8.79962		16.116	3.96789	5.70967		6.97158	4.78681	3.17091		6.98433	0.727855	5.77133
	yedR	U00096.3:2033118-2033484		0	5.85484	9.41089		6.26249	10.7855	15.626		10.4648	27.3362	17.6749		21.8015	3.87671	4.48321		9.53044	5.74231	0.777022
	rseX	U00096.3:2033648-2033739		0	0	0		0	0	0		0	0	0		0	0	0		0	0	47.3513
	yedS	U00096.3:2034050-2035243		0.40128	0.839498	0.234178		0.473152	1.03412	2.13707		3.53904	2.40994	2.13105		2.85864	2.5922	7.1613		6.12818	3.10876	2.19171
	hchA	U00096.3:2035834-2036686		5.69512	23.6982	15.532		13.1991	14.8663	11.6051		7.19306	11.7692	5.97796		9.59189	5.98175	7.41457		9.79543	11.5716	6.67272
	yedV	U00096.3:2036793-2038823		5.67317	4.28407	3.28172		3.2229	4.23321	4.63825		2.15714	2.68974	5.08313		2.75109	1.63483	4.69804		6.11121	7.06344	2.20617
	yedW	U00096.3:2036793-2038823		15.1278	13.4959	14.208		14.1389	7.29619	13.6308		6.41376	4.76924	7.12175		8.29569	8.72809	10.7069		16.5997	14.5399	12.3701
	hiuH	U00096.3:2038955-2039369		0	1.32096	0		0	1.11934	0.949354		0	0.862589	0		0.825376	0.489757	5.4213		0	0.761276	0.687911
	yedY	U00096.3:2039477-2040482		2.51118	3.93935	3.88156		3.79672	2.07948	1.89552		5.12058	2.89538	2.3692		2.41414	2.65194	3.00344		2.79005	3.82193	2.8486
	yedZ	U00096.3:2040482-2041118		0.127511	0.313414	0.726297		0.596667	1.10145	1.79184		0	0.773365	1.64265		0.747604	0	0.724115		1.7447	0.728693	1.60188
	zinT	U00096.3:2041374-2042025		1.06693	3.66485	1.55939		2.5812	2.00506	1.81653		3.27345	4.37441	3.04047		3.81557	2.09749	2.78297		5.13046	3.64384	1.75604
	yodB	U00096.3:2042367-2042898		3.26747	0.560425	0.442418		1.42355	1.92027	1.08086		2.63364	1.80093	3.93683		2.86591	1.24681	1.02287		4.02703	0.654366	0.822909
	serU	U00096.3:2043467-2043557		349836	1009100	376700		609392	1086110	675363		288551	588086	628004		766397	740320	1118290		747245	497248	504051
	mtfA	U00096.3:2043650-2044448		75.0021	57.2073	23.4042		20.5334	12.3542	10.787		7.47597	9.95746	10.9389		13.1538	5.55762	13.6286		31.5789	38.2525	18.5925
	asnT	U00096.3:2044548-2044624		9080090	4847970	6601260		16307100	23350200	6243320		6618450	3922150	15233200		31432400	6724060	13704500		8577510	6596200	5893860
	yeeJ	U00096.3:2044937-2052014		0.601257	1.49199	1.20464		0.82764	0.820514	1.30586		2.25061	1.95249	2.66354		3.49949	2.61108	2.58087		2.91689	2.42487	2.11878
	yeeL	U00096.3:2052275-2053328		0.369132	0.30962	1.65561		0.621434	1.13386	0.881801		0.265521	1.46813	2.11541		3.4348	1.24696	2.60716		2.57751	2.96346	0.844398
	shiA	U00096.3:2053642-2054959		2.67273	4.89723	3.83796		2.5856	2.75752	1.93966		2.8764	2.3157	1.46678		1.91968	1.09805	2.71492		2.01817	2.3765	1.34435
	amn	U00096.3:2055060-2056515		7.51591	19.5301	16.341		11.1629	11.704	11.2089		4.56853	5.9921	4.57802		9.38322	4.20536	3.90673		7.51155	6.94075	8.28234
	yeeN	U00096.3:2056857-2057574		41.0333	59.7254	60.31		35.3342	58.4679	74.3909		22.3472	28.006	57.4436		16.8951	17.7035	34.778		20.7798	8.61926	9.53461
	asnW	U00096.3:2058026-2058102		33290900	14057200	8738550		42425600	44580000	11263500		5360210	5398790	22400800		43896600	9824730	15527400		10766400	29354300	3693290
	yeeO	U00096.3:2058202-2059690		1.18573	1.09072	1.32873		1.60735	0.483164	1.54628		1.11054	1.55163	3.10186		2.08514	1.62103	1.91386		2.04324	2.01945	1.69261
	asnU	U00096.3:2059850-2059926		18750300	9303090	6704300		33390700	43391800	10909600		8464750	4527280	18677200		47119700	7883610	13887900		10218500	18996700	7984070
	cbl	U00096.3:2059963-2060914		0.551162	1.43099	1.91442		3.20903	2.80252	4.3346		15.1932	13.7782	21.4381		22.9295	20.4368	22.5383		20.8114	16.5894	14.055
[truncated: 2,452 more rows]

## Sheet: Means & Relative ratio
	CDS (synomyms)	locus		x_t0	x_t5	x_t10	x_t15	x_t20		r_t5	t_t5	p_t5	q_t5	s_t5		r_t10	t_t10	p_t10	q_t10	s_t10		r_t15	t_t15	p_t15	q_t15	s_t15		r_t20	t_t20	p_t20	q_t20	s_t20
	thrL	U00096.3:189-255		21071.2	13151.6	7755.61	10872.5	6446.69		-0.680041	-1.28703	0.0223	0.0730864	no		-1.44196	-2.68876	5e-05	0.000456756	yes		-0.954586	-1.73611	0.00515	0.0231757	yes		-1.70864	-2.92847	5e-05	0.000456756	yes
	thrA	U00096.3:336-2799		29.16	22.2858	8.85942	10.0113	9.32336		-0.387865	-0.851437	0.13845	0.283708	no		-1.71871	-3.78148	5e-05	0.000456756	yes		-1.54235	-3.35463	5e-05	0.000456756	yes		-1.64507	-3.64762	5e-05	0.000456756	yes
	thrB	U00096.3:2800-3733		28.4546	30.6625	13.4302	12.4227	11.2743		0.107812	0.229103	0.6972	0.819874	no		-1.08318	-2.05945	0.0007	0.00461134	yes		-1.19568	-2.37873	0.00015	0.00122022	yes		-1.33563	-2.63607	5e-05	0.000456756	yes
	thrC	U00096.3:3733-5020		40.7536	46.6807	14.1926	9.26801	11.8798		0.195901	0.432697	0.46625	0.640165	no		-1.52178	-3.31317	5e-05	0.000456756	yes		-2.1366	-4.51101	5e-05	0.000456756	yes		-1.77842	-3.85879	5e-05	0.000456756	yes
	yaaX	U00096.3:5233-5530		18.2547	42.5518	19.335	11.2496	10.7435		1.22095	1.69975	0.00705	0.0298213	yes		0.0829456	0.099163	0.8636	0.92432	no		-0.698389	-0.743905	0.1996	0.363715	no		-0.764811	-0.805057	0.1652	0.319963	no
	yaaA	U00096.3:5682-6459		26.7286	18.6117	13.4574	9.13976	7.45049		-0.522175	-1.03479	0.08095	0.194236	no		-0.989985	-1.88185	0.00245	0.0128398	yes		-1.54815	-2.81202	5e-05	0.000456756	yes		-1.84298	-3.24445	5e-05	0.000456756	yes
	yaaJ	U00096.3:6528-7959		2.82279	1.51452	1.87636	1.21891	1.97779		-0.898261	-1.22403	0.0493	0.13429	no		-0.589189	-0.816303	0.17195	0.328963	no		-1.21153	-1.49665	0.01755	0.0606608	no		-0.513235	-0.724588	0.23225	0.401745	no
	talB	U00096.3:8237-9191		403.3	346.95	233.849	145.108	172.081		-0.217129	-0.473409	0.4486	0.624532	no		-0.786279	-1.6593	0.00645	0.0277813	yes		-1.47473	-3.34374	5e-05	0.000456756	yes		-1.22877	-2.75442	5e-05	0.000456756	yes
	mog	U00096.3:9305-9893		24.3672	31.1565	19.6425	18.1873	19.1249		0.354594	0.686183	0.23705	0.407288	no		-0.31096	-0.563423	0.3097	0.487744	no		-0.422003	-0.770787	0.1854	0.346116	no		-0.349486	-0.63826	0.26385	0.436694	no
	satP	U00096.3:9927-10494		2.66575	5.4898	7.76292	15.1547	10.4646		1.04221	1.09801	0.06585	0.166838	no		1.54206	1.66643	0.00985	0.0386949	yes		2.50715	2.88603	0.00015	0.00122022	yes		1.9729	2.20786	0.002	0.0109348	yes
	yaaW	U00096.3:10642-11356		1.23869	1.33142	5.45002	6.51313	6.9826		0.104149	0	1	1	no		2.13744	2.31957	0.006	0.0261984	yes		2.39453	2.69521	0.00345	0.0168797	yes		2.49495	2.71462	0.0028	0.0142743	yes
	yaaI	U00096.3:11381-11786		0.365367	0.417845	0.354181	2.05517	1.73632		0.193622	0	1	1	no		-0.0448596	0	1	1	no		2.49184	0.802809	0.19645	0.359942	no		2.24862	0	1	1	no
	dnaK	U00096.3:12162-14079		725.56	613.024	479.361	2101.98	2058.99		-0.24315	-0.436703	0.47235	0.645287	no		-0.59798	-1.12495	0.0689	0.172541	no		1.53458	2.76842	5e-05	0.000456756	yes		1.50477	2.63929	0.0001	0.000855768	yes
	dnaJ	U00096.3:14167-15298		78.5454	90.7385	88.3451	298.908	237.16		0.208187	0.447613	0.4516	0.627007	no		0.169623	0.368029	0.5298	0.694082	no		1.9281	4.10583	5e-05	0.000456756	yes		1.59426	3.42799	5e-05	0.000456756	yes
	hokC	U00096.3:16750-17006		2.70271	0	0	0	8.19918		-inf	0	1	1	no		-inf	0	1	1	no		-inf	0	1	1	no		1.60108	0	1	1	no
	mokC	U00096.3:16750-17006		0	0	0	0	0		0	0	1	1	no		0	0	1	1	no		0	0	1	1	no		0	0	1	1	no
	sokC	U00096.3:16750-17006		7836.13	4499.63	3346.87	5745.55	5360		-0.800335	-0.932773	0.11065	0.242375	no		-1.22733	-2.36192	0.23535	0.405163	no		-0.447698	-0.625123	0.4056	0.585165	no		-0.54791	-0.664406	0.3009	0.478248	no
	nhaA	U00096.3:17488-18655		19.4069	26.1468	25.4154	28.7606	19.619		0.430065	0.922115	0.11055	0.242186	no		0.389134	0.821872	0.1521	0.302499	no		0.567529	1.22833	0.03585	0.105445	no		0.0156831	0.0332864	0.95465	0.973578	no
	nhaR	U00096.3:18714-19620		10.7967	17.0152	13.3216	18.0212	14.7997		0.656233	1.27693	0.02975	0.0913935	no		0.303183	0.567975	0.3202	0.499064	no		0.739102	1.42598	0.01405	0.0509918	no		0.454983	0.869356	0.1247	0.26377	no
	rpsT	U00096.3:20814-21078		2646.43	6676.71	4488.1	4146.77	3606.43		1.33509	2.29734	5e-05	0.000456756	yes		0.762058	1.30261	0.019	0.0645722	no		0.647943	1.10609	0.0473	0.130145	no		0.446524	0.777185	0.15255	0.303043	no
	yaaY	U00096.3:21180-21399		3.17888	4.38094	24.6055	21.5656	16.7808		0.462721	0	1	1	no		2.95239	3.03379	0.25155	0.423738	no		2.76214	2.15067	0.2523	0.424265	no		2.40022	1.89029	0.25515	0.427333	no
	ribF	U00096.3:21406-22348		27.4809	21.7276	10.0713	17.4901	15.767		-0.338901	-0.738919	0.21465	0.381444	no		-1.44818	-2.84652	5e-05	0.000456756	yes		-0.651888	-1.35257	0.02475	0.0790944	no		-0.80152	-1.67238	0.0054	0.0240632	yes
	ileS	U00096.3:22390-25701		52.2979	61.6139	30.2293	37.3945	38.5936		0.236504	0.483454	0.4221	0.600667	no		-0.790803	-1.62018	0.00775	0.0321001	yes		-0.483927	-1.00789	0.09925	0.224569	no		-0.43839	-0.937679	0.1285	0.269309	no
	lspA	U00096.3:22390-25701		47.2811	69.5064	30.7107	48.3411	36.6114		0.555883	0.393892	0.509	0.676924	no		-0.622521	-0.407137	0.53525	0.698784	no		0.0319887	0.0236334	0.96785	0.980199	no		-0.368969	-0.257346	0.69145	0.815972	no
	fkpB	U00096.3:25825-26275		70.5684	78.2364	41.5101	51.5824	68.3794		0.148818	0.310545	0.59145	0.742339	no		-0.765561	-1.57758	0.0068	0.0289961	yes		-0.452144	-0.931034	0.1086	0.23926	no		-0.0454596	-0.0959371	0.8674	0.926602	no
	ispH	U00096.3:26276-27227		18.0507	31.8407	18.6585	25.6279	28.6613		0.818815	1.92202	0.00305	0.0152772	yes		0.0477803	0.102362	0.8669	0.926272	no		0.505659	1.1222	0.0699	0.174456	no		0.667048	1.52355	0.0183	0.0626925	no
	rihC	U00096.3:27292-28207		37.7318	16.6857	9.3562	7.69179	13.6074		-1.17717	-2.57959	5e-05	0.000456756	yes		-2.01178	-3.90899	5e-05	0.000456756	yes		-2.29439	-4.82029	5e-05	0.000456756	yes		-1.47139	-3.15245	5e-05	0.000456756	yes
	dapB	U00096.3:28373-29195		36.0529	39.1537	18.7568	14.5383	11.5205		0.119032	0.268572	0.6612	0.795229	no		-0.942704	-1.99383	0.001	0.00621606	yes		-1.31026	-2.80256	5e-05	0.000456756	yes		-1.64591	-3.35777	5e-05	0.000456756	yes
	carA	U00096.3:29650-30799		3.74883	2.70494	4.25341	4.76993	4.78171		-0.470844	-0.69909	0.2533	0.425276	no		0.182183	0.281931	0.6319	0.773382	no		0.34753	0.559337	0.3519	0.531934	no		0.351089	0.565166	0.3502	0.53007	no
	carB	U00096.3:30816-34038		2.29232	2.24165	2.2483	2.1689	2.78864		-0.0322468	-0.0604678	0.91785	0.953569	no		-0.0279711	-0.0514862	0.93215	0.961199	no		-0.0798438	-0.145782	0.8133	0.895496	no		0.282754	0.531462	0.3716	0.551875	no
	caiF	U00096.3:34299-34695		7.6369	3.17569	5.74401	18.9965	12.2928		-1.26592	-1.22208	0.0655	0.166141	no		-0.410929	-0.503561	0.47815	0.650511	no		1.31467	1.87454	0.0109	0.0419303	yes		0.686754	0.899197	0.1611	0.314765	no
	caiE	U00096.3:34780-35371		3.27981	16.6582	276.055	366.446	313.878		2.34455	3.03015	0.00015	0.00122022	yes		6.3952	8.60953	5e-05	0.000456756	yes		6.80385	9.05664	5e-05	0.000456756	yes		6.58045	8.7989	5e-05	0.000456756	yes
	caiD	U00096.3:35376-36162		0.984223	6.02505	68.9271	113.294	101.227		2.61391	2.46859	0.0034	0.0166933	yes		6.12994	6.08727	0.0002	0.00156767	yes		6.84687	6.82939	0.0002	0.00156767	yes		6.68439	6.64909	0.0002	0.00156767	yes
	caiC	U00096.3:36270-37824		0.861128	0.764303	5.05978	5.19394	6.47792		-0.172083	0	1	1	no		2.55477	3.40245	5e-05	0.000456756	yes		2.59253	3.45917	5e-05	0.000456756	yes		2.91123	3.95303	5e-05	0.000456756	yes
	caiB	U00096.3:37897-39115		1.69342	2.37455	8.41035	11.5537	10.0054		0.487709	0.616606	0.3025	0.47979	no		2.31222	3.31309	5e-05	0.000456756	yes		2.77035	4.04484	5e-05	0.000456756	yes		2.56276	3.71211	5e-05	0.000456756	yes
	caiA	U00096.3:39243-40386		3.14599	2.4527	4.25996	6.21216	5.43578		-0.359143	-0.491582	0.3989	0.57877	no		0.437327	0.654703	0.27605	0.450649	no		0.981583	1.55715	0.01215	0.0456363	yes		0.788974	1.24221	0.0409	0.116663	no
	caiT	U00096.3:40416-41931		0.304094	0.101753	0.153424	1.08526	0.550285		-1.57944	0	1	1	no		-0.986988	0	1	1	no		1.83545	0	1	1	no		0.855665	0	1	1	no
	fixA	U00096.3:42402-43173		0.439313	0.588466	0.38696	0.354645	1.15534		0.421711	0	1	1	no		-0.183064	0	1	1	no		-0.308874	0	1	1	no		1.395	0	1	1	no
	fixB	U00096.3:43187-44129		0.999051	0.778495	3.73686	4.05426	5.06925		-0.359872	0	1	1	no		1.9032	1.80983	0.0135	0.0494839	yes		2.02081	1.9511	0.0091	0.0363836	yes		2.34314	2.27906	0.0041	0.0193775	yes
	fixC	U00096.3:44179-45466		0.175102	0.612307	3.38953	2.08879	2.39471		1.80606	0	1	1	no		4.27481	2.42948	0.24395	0.415211	no		3.57639	1.99886	0.24395	0.415211	no		3.77358	2.14622	0.24395	0.415211	no
	fixX	U00096.3:45463-45750		0.346824	0.763452	8.0774	4.39241	2.93703		1.13833	0	1	1	no		4.54162	1.0737	0.2333	0.402934	no		3.66274	0.794129	0.279	0.453909	no		3.08208	0	1	1	no
	yaaU	U00096.3:45806-47138		0.402382	0.283664	2.13671	1.78167	1.94458		-0.504383	0	1	1	no		2.40875	2.14514	0.0095	0.0376303	yes		2.14659	0	1	1	no		2.27282	0	1	1	no
	kefC	U00096.3:47245-49631		2.30769	2.19981	1.29631	2.02653	1.67982		-0.0690713	-0.111998	0.85675	0.920498	no		-0.83204	-1.12434	0.0679	0.170525	no		-0.187433	-0.2897	0.6322	0.773519	no		-0.458145	-0.691555	0.26565	0.438842	no
	kefF	U00096.3:47245-49631		1.30433	0.938803	1.48723	0.780876	1.71888		-0.474418	0	1	1	no		0.189312	0	1	1	no		-0.740149	0	1	1	no		0.398159	0	1	1	no
	folA	U00096.3:49822-50302		32.5503	41.5969	27.1089	28.8963	18.9653		0.353803	0.705454	0.24765	0.419527	no		-0.263906	-0.474948	0.4052	0.584856	no		-0.171789	-0.34649	0.5743	0.729153	no		-0.779312	-1.41786	0.0234	0.075779	no
	apaH	U00096.3:50379-51222		10.0842	17.5444	61.1138	66.4231	90.2389		0.798915	1.52796	0.01215	0.0456363	yes		2.5994	5.20457	5e-05	0.000456756	yes		2.71959	5.45717	5e-05	0.000456756	yes		3.16165	6.37684	5e-05	0.000456756	yes
	apaG	U00096.3:51228-51606		110.83	134.643	387.797	568.015	552.557		0.280794	0.671987	0.29915	0.476162	no		1.80696	4.28528	5e-05	0.000456756	yes		2.35759	5.51772	5e-05	0.000456756	yes		2.31778	5.20355	5e-05	0.000456756	yes
	pdxA	U00096.3:51608-54702		16.7671	39.5298	195.762	247.605	271.542		1.23731	0.681157	0.24975	0.421879	no		3.5454	1.84403	0.16435	0.318953	no		3.88434	2.06829	0.02985	0.0916163	no		4.01747	2.23438	0.2035	0.368005	no
	rsmA	U00096.3:51608-54702		46.843	78.7251	265.998	280.143	332.294		0.748991	0.569489	0.3225	0.501462	no		2.50551	1.65077	0.07895	0.190854	no		2.58026	1.60092	0.206	0.371155	no		2.82656	1.96661	0.071	0.176499	no
	surA	U00096.3:51608-54702		81.0622	264.22	1512.54	1682.06	1767.45		1.70464	2.96571	5e-05	0.000456756	yes		4.2218	6.90714	5e-05	0.000456756	yes		4.37506	7.20017	5e-05	0.000456756	yes		4.4465	7.14058	5e-05	0.000456756	yes
	lptD	U00096.3:54754-57109		45.8438	97.3436	297.499	358.33	352.797		1.08636	2.38833	0.00015	0.00122022	yes		2.69809	5.62531	5e-05	0.000456756	yes		2.96649	6.15504	5e-05	0.000456756	yes		2.94404	6.08903	5e-05	0.000456756	yes
	djlA	U00096.3:57363-58179		12.9802	39.2837	222.535	215.831	194.648		1.59762	3.21495	5e-05	0.000456756	yes		4.09965	8.1323	5e-05	0.000456756	yes		4.05552	8.10587	5e-05	0.000456756	yes		3.90648	7.82409	5e-05	0.000456756	yes
	yabP	U00096.3:58473-59279		12.3099	27.1511	139.266	162.849	145.479		1.1412	2.27008	0.00025	0.00190147	yes		3.49996	6.89874	5e-05	0.000456756	yes		3.72565	7.47817	5e-05	0.000456756	yes		3.56292	7.08475	5e-05	0.000456756	yes
	rluA	U00096.3:59686-60346		10.1742	25.137	21.3321	29.9489	19.4771		1.3049	2.03949	0.0007	0.00461134	yes		1.06811	1.64886	0.0039	0.018642	yes		1.55759	2.44771	0.0001	0.000855768	yes		0.936865	1.43341	0.01075	0.041461	yes
	rapA	U00096.3:60357-63264		7.83429	23.8754	25.3841	28.0798	19.9754		1.60765	3.34443	5e-05	0.000456756	yes		1.69605	3.45393	5e-05	0.000456756	yes		1.84166	3.75201	5e-05	0.000456756	yes		1.35035	2.73003	5e-05	0.000456756	yes
	polB	U00096.3:63428-65780		3.2436	2.0938	1.52904	1.71175	2.76349		-0.631475	-1.08541	0.06735	0.169543	no		-1.08497	-1.75915	0.00505	0.0228065	yes		-0.922123	-1.57305	0.0121	0.0454965	yes		-0.231108	-0.429075	0.4847	0.65609	no
	araD	U00096.3:65854-66550		0.513279	0.345461	2.81877	1.54188	0.629759		-0.571219	0	1	1	no		2.45725	1.61486	0.0339	0.100984	no		1.58687	0	1	1	no		0.295056	0	1	1	no
	araA	U00096.3:66834-68337		0.937775	0.409843	0.666172	1.65728	1.36321		-1.19417	0	1	1	no		-0.493347	0	1	1	no		0.821506	0	1	1	no		0.539696	0	1	1	no
	araB	U00096.3:68347-70048		0.344916	0.0944704	0.537629	0.79174	1.12796		-1.86831	0	1	1	no		0.640365	0	1	1	no		1.19878	0	1	1	no		1.7094	0	1	1	no
	araC	U00096.3:70386-71265		17.0736	4.05888	7.37168	5.56309	19.6455		-2.07261	-3.45343	5e-05	0.000456756	yes		-1.2117	-2.17454	0.00085	0.0054162	yes		-1.6178	-2.69017	5e-05	0.000456756	yes		0.202433	0.406408	0.47835	0.650582	no
	yabI	U00096.3:71350-72115		5.85972	89.2427	365.487	327.7	362.109		3.92883	7.02642	5e-05	0.000456756	yes		5.96285	10.5965	5e-05	0.000456756	yes		5.8054	10.9571	5e-05	0.000456756	yes		5.94945	10.2623	5e-05	0.000456756	yes
	thiB	U00096.3:72228-75480		6.99003	7.96587	3.14263	3.42779	2.91634		0.188532	0.23968	0.6923	0.816668	no		-1.15333	-1.12565	0.10735	0.237271	no		-1.02802	-1.635	0.0488	0.133214	no		-1.26114	-1.43211	0.0212	0.0703414	no
	thiP	U00096.3:72228-75480		2.32021	2.89872	3.29727	1.924	1.21572		0.321161	0.337932	0.57575	0.730246	no		0.507017	0.473754	0.41335	0.592038	no		-0.270144	-0.261846	0.6518	0.788064	no		-0.932449	-0.888429	0.13005	0.271629	no
	thiQ	U00096.3:72228-75480		3.84567	4.3191	3.32305	0.906276	1.49757		0.167496	0.123991	0.84005	0.910773	no		-0.210725	-0.148034	0.7977	0.885485	no		-2.08521	-1.01152	0.1368	0.281397	no		-1.36061	-0.830605	0.1985	0.36228	no
	sgrR	U00096.3:75643-77299		3.4946	2.40722	1.81812	1.5046	2.19511		-0.537758	-0.872225	0.14305	0.289949	no		-0.942681	-1.36773	0.0235	0.076029	no		-1.21575	-1.74716	0.0054	0.0240632	yes		-0.670836	-1.0535	0.07305	0.180318	no
	sgrS	U00096.3:77366-77593		159.743	139.625	123.371	110.733	58.0047		-0.194191	-0.323428	0.58765	0.739624	no		-0.372751	-0.591008	0.33655	0.51582	no		-0.528671	-0.803246	0.1968	0.360336	no		-1.46151	-2.04034	0.0016	0.00911016	yes
	sgrT	U00096.3:77366-77593		78.6856	0	63.9116	44.5983	0		-inf	nan	0.1255	0.265011	no		-0.300023	-0.0782732	0.8471	0.914992	no		-0.81911	-0.200951	0.6715	0.802658	no		-inf	nan	0.12625	0.2659	no
	setA	U00096.3:77620-78799		9.58657	7.3371	5.65358	6.1318	6.14958		-0.385806	-0.708341	0.21025	0.376106	no		-0.76185	-1.30012	0.0262	0.0827515	no		-0.644704	-1.19186	0.04525	0.125697	no		-0.640528	-1.17046	0.0473	0.130145	no
	leuD	U00096.3:78847-79453		3.91019	3.35745	12.1935	9.47206	15.0918		-0.219873	-0.267574	0.68705	0.812904	no		1.64081	2.3306	0.00195	0.0107142	yes		1.27644	1.86761	0.01015	0.0396486	yes		1.94846	2.91767	0.00055	0.00375442	yes
	leuC	U00096.3:79463-80864		1.57788	2.85026	10.9466	12.6807	13.1569		0.853103	1.18385	0.0556	0.14697	no		2.79442	4.23831	5e-05	0.000456756	yes		3.00658	4.61318	5e-05	0.000456756	yes		3.05976	4.72278	5e-05	0.000456756	yes
	leuA	U00096.3:80866-83529		1.82301	1.69534	4.47068	3.7035	5.15458		-0.104749	0	1	1	no		1.29417	1.65182	0.0094	0.0373563	yes		1.02257	1.21671	0.05065	0.136988	no		1.49954	1.93865	0.00245	0.0128398	yes
	leuB	U00096.3:80866-83529		1.79051	1.3567	6.99067	11.4298	10.3159		-0.400268	0	1	1	no		1.96506	2.20639	0.00295	0.0148699	yes		2.67436	3.19728	0.00015	0.00122022	yes		2.52642	2.95255	0.00045	0.00315248	yes
	leuL	U00096.3:83621-83708		2259.18	918.725	914.35	807.954	445.259		-1.29809	-2.17108	0.00355	0.0172818	yes		-1.30498	-2.09425	0.00395	0.0188186	yes		-1.48345	-2.09752	0.00315	0.0156736	yes		-2.34308	-3.11641	0.0005	0.0034587	yes
	leuO	U00096.3:84367-85312		1.73353	0.630026	0.482888	2.16783	1.49201		-1.46023	0	1	1	no		-1.84396	0	1	1	no		0.322536	0	1	1	no		-0.216455	0	1	1	no
	ilvI	U00096.3:85629-87354		4.37097	2.9651	4.32327	3.61128	4.12259		-0.55987	-0.956567	0.1048	0.233336	no		-0.0158294	-0.0282951	0.95595	0.974196	no		-0.275444	-0.490788	0.40525	0.584881	no		-0.0844027	-0.150845	0.79855	0.885912	no
	ilvH	U00096.3:87356-87848		3.28595	0.565665	2.76885	5.2532	5.4235		-2.53829	-1.66514	0.13295	0.275678	no		-0.247024	-0.216969	0.7117	0.829428	no		0.676886	0.709936	0.276	0.450581	no		0.722913	0.763513	0.22135	0.389176	no
	cra	U00096.3:88027-89032		22.7178	12.1205	26.2488	28.8577	25.3066		-0.906374	-1.92217	0.0013	0.00769953	yes		0.208433	0.449163	0.44475	0.621166	no		0.345135	0.768895	0.2029	0.367331	no		0.155692	0.340369	0.5664	0.723289	no
	mraZ	U00096.3:89633-90092		85.482	56.9839	52.2771	60.2881	43.6883		-0.585066	-1.37925	0.03525	0.104076	no		-0.709442	-1.55576	0.0121	0.0454965	yes		-0.503746	-1.09927	0.073	0.180236	no		-0.968372	-2.17709	0.001	0.00621606	yes
	ftsL	U00096.3:90093-91397		563.846	733.417	406.548	200.595	162.13		0.379332	0.586523	0.3971	0.577069	no		-0.471875	-0.620993	0.4136	0.592253	no		-1.49102	-1.70146	0.00975	0.0384152	yes		-1.79815	-2.25224	0.0051	0.0229914	yes
	rsmH	U00096.3:90093-91397		60.4915	55.3497	30.0312	38.5717	37.7994		-0.128157	-0.092452	0.86045	0.922708	no		-1.01027	-0.543689	0.2165	0.383531	no		-0.649189	-0.502723	0.33615	0.51534	no		-0.67837	-0.562781	0.2852	0.460917	no
	ftsI	U00096.3:91412-97084		33.9251	37.2577	24.0779	18.721	22.6834		0.135188	0.159632	0.7912	0.88183	no		-0.494641	-0.586861	0.32225	0.501219	no		-0.857694	-1.00225	0.0899	0.209272	no		-0.580713	-0.63468	0.27915	0.454084	no
	mraY	U00096.3:91412-97084		23.402	38.3116	27.2136	25.064	25.9994		0.711151	0.615953	0.2987	0.475744	no		0.217697	0.192178	0.73985	0.848333	no		0.0989843	0.0867573	0.88205	0.934523	no		0.15185	0.129906	0.82755	0.903669	no
	murE	U00096.3:91412-97084		25.441	31.4204	15.2012	23.7988	26.9454		0.304551	0.323579	0.58355	0.736688	no		-0.742971	-0.743495	0.20235	0.366784	no		-0.0962647	-0.109481	0.8497	0.916357	no		0.082885	0.0911647	0.8729	0.929312	no
	murF	U00096.3:91412-97084		18.9812	21.3456	12.7992	9.96425	17.1805		0.16937	0.140924	0.8154	0.896753	no		-0.568518	-0.464343	0.4343	0.612031	no		-0.929736	-0.760089	0.22675	0.395554	no		-0.1438	-0.130516	0.8325	0.906587	no
	ftsW	U00096.3:97086-100711		15.111	27.5872	19.0679	25.2116	21.7384		0.8684	0.834538	0.15255	0.303043	no		0.335544	0.288834	0.6078	0.755131	no		0.738488	0.778014	0.1912	0.353689	no		0.524647	0.563248	0.3316	0.510463	no
	murD	U00096.3:97086-100711		31.1972	66.3103	39.8113	31.6114	33.8178		1.08782	1.62337	0.0089	0.0357717	yes		0.351763	0.499078	0.39295	0.573099	no		0.019029	0.0278912	0.9627	0.977619	no		0.116365	0.176957	0.77345	0.869991	no
	murG	U00096.3:97086-100711		20.2898	39.9045	32.3949	27.1768	23.3098		0.975797	0.98978	0.08915	0.207962	no		0.675014	0.702206	0.22725	0.396141	no		0.421624	0.433348	0.4529	0.628125	no		0.200185	0.200052	0.7245	0.83861	no
	ddlB	U00096.3:100764-103153		44.6975	66.4352	60.5384	41.7563	41.1109		0.571754	0.86101	0.14905	0.298156	no		0.437658	0.670324	0.2624	0.43528	no		-0.0982009	-0.142097	0.8068	0.891375	no		-0.120674	-0.175627	0.758	0.860506	no
	murC	U00096.3:100764-103153		25.0414	41.2156	33.5539	31.5336	33.5961		0.718875	1.14996	0.055	0.145723	no		0.422163	0.651438	0.26585	0.43905	no		0.332575	0.547049	0.3637	0.543746	no		0.423977	0.698025	0.23325	0.402913	no
	ftsA	U00096.3:103154-105244		67.3934	113.71	282.61	285.19	300.659		0.75468	1.4235	0.01635	0.0573718	no		2.06813	3.92055	5e-05	0.000456756	yes		2.08125	3.97879	5e-05	0.000456756	yes		2.15745	4.08681	5e-05	0.000456756	yes
	ftsQ	U00096.3:103154-105244		29.354	56.3823	58.9695	53.7073	43.1543		0.941686	0.880542	0.13265	0.27526	no		1.00641	0.713992	0.20925	0.374984	no		0.87156	0.544753	0.3127	0.490903	no		0.555947	0.3293	0.5625	0.720136	no
	ftsZ	U00096.3:105304-106456		98.7837	189.407	769.331	668.465	699.696		0.939148	2.19677	0.00035	0.00253827	yes		2.96126	6.08012	5e-05	0.000456756	yes		2.75851	5.96472	5e-05	0.000456756	yes		2.82438	6.17268	5e-05	0.000456756	yes
	lpxC	U00096.3:106556-107474		110.199	164.362	238.742	349.542	315.293		0.576766	1.35307	0.03195	0.096545	no		1.11533	2.51917	0.0001	0.000855768	yes		1.66535	3.90213	5e-05	0.000456756	yes		1.51658	3.47423	5e-05	0.000456756	yes
	secM	U00096.3:107704-108217		68.0364	56.3996	152.615	169.652	183.945		-0.27062	-0.615301	0.321	0.499931	no		1.16552	2.64122	5e-05	0.000456756	yes		1.3182	2.906	5e-05	0.000456756	yes		1.4349	3.2441	5e-05	0.000456756	yes
	secA	U00096.3:108278-110984		66.7714	68.157	150.256	274.443	266.256		0.0296322	0.0676194	0.9116	0.9505	no		1.17012	2.56115	5e-05	0.000456756	yes		2.0392	4.30253	5e-05	0.000456756	yes		1.99551	4.18207	5e-05	0.000456756	yes
	mutT	U00096.3:111043-111433		12.4382	14.3525	16.2129	22.1209	18.0559		0.206532	0.27738	0.6363	0.776416	no		0.382367	0.528743	0.39705	0.577012	no		0.830636	1.26543	0.0534	0.142539	no		0.5377	0.734747	0.2164	0.38343	no
	yacG	U00096.3:111648-111846		394.61	495.508	358.534	215.429	218.071		0.328481	0.664651	0.2619	0.434761	no		-0.138315	-0.277021	0.6436	0.781675	no		-0.873211	-1.66216	0.00645	0.0277812	yes		-0.855628	-1.62956	0.0098	0.0385552	yes
	coaE	U00096.3:111855-113219		20.7831	19.9494	17.7703	14.8293	13.8345		-0.059067	-0.0789896	0.89235	0.940206	no		-0.225947	-0.254108	0.6436	0.781675	no		-0.486965	-0.645833	0.278	0.452807	no		-0.587145	-0.750089	0.206	0.371155	no
	zapD	U00096.3:111855-113219		21.7104	26.5796	22.9088	15.2152	17.7826		0.291928	0.490481	0.3998	0.579666	no		0.0775139	0.116502	0.8462	0.914448	no		-0.512874	-0.782038	0.18505	0.345681	no		-0.287926	-0.457771	0.4391	0.616212	no
	guaC	U00096.3:113443-114487		34.9666	45.1509	22.9603	21.5171	12.1517		0.368779	0.824182	0.16105	0.314713	no		-0.606834	-1.30117	0.0263	0.0829986	no		-0.700493	-1.54761	0.00995	0.0390388	yes		-1.52482	-3.14778	5e-05	0.000456756	yes
	hofB	U00096.3:114521-117099		0.346519	1.22158	1.60959	2.76663	2.77647		1.81775	0	1	1	no		2.21569	0	1	1	no		2.99712	1.96418	0.01255	0.0468288	yes		3.00225	2.01052	0.0108	0.0416087	yes
	hofC	U00096.3:114521-117099		1.42778	1.96827	0.813853	2.64647	1.47791		0.463161	0	1	1	no		-0.810928	0	1	1	no		0.890302	0.938176	0.1019	0.22877	no		0.0497887	0	1	1	no
	ppdD	U00096.3:117108-117549		0.126983	0	0.985035	0.940538	0.178752		-inf	0	1	1	no		2.95554	0	1	1	no		2.88885	0	1	1	no		0.493323	0	1	1	no
	nadC	U00096.3:117751-118645		8.94446	5.76664	3.32227	4.04967	3.58864		-0.633262	-1.15704	0.0797	0.192136	no		-1.42882	-2.17304	0.0018	0.0100316	yes		-1.14319	-1.83876	0.0059	0.025857	yes		-1.31756	-2.07976	0.00215	0.0115793	yes
	ampD	U00096.3:118732-120135		15.44	6.02046	5.68609	6.71162	8.3384		-1.35873	-1.20193	0.05155	0.138774	no		-1.44116	-1.0365	0.11755	0.253062	no		-1.20194	-1.19768	0.08025	0.193087	no		-0.888831	-1.10875	0.09965	0.225235	no
	ampE	U00096.3:118732-120135		13.502	9.16814	9.91076	6.85863	7.45394		-0.558476	-0.900815	0.16965	0.326083	no		-0.446109	-0.653087	0.29785	0.474645	no		-0.977185	-1.41911	0.0322	0.0971189	no		-0.857102	-1.39078	0.02945	0.090686	no
	aroP	U00096.3:120177-121551		7.23377	5.87816	13.889	13.2741	15.2066		-0.299383	-0.57249	0.34425	0.523904	no		0.941117	1.94299	0.00215	0.0115793	yes		0.875792	1.75951	0.00365	0.0176751	yes		1.07188	2.22069	0.00065	0.00432846	yes
	pdhR	U00096.3:122091-122856		38.8878	72.9691	62.2822	31.6198	10.8073		0.907968	1.99706	0.0022	0.0117926	yes		0.679503	1.41921	0.0205	0.0684703	no		-0.298489	-0.592196	0.321	0.499931	no		-1.84731	-3.52676	5e-05	0.000456756	yes
	aceE	U00096.3:123016-125680		211.277	301.183	257.86	182.84	61.5368		0.511506	0.848184	0.1222	0.26006	no		0.287454	0.471778	0.387	0.567306	no		-0.208549	-0.343743	0.51645	0.683339	no		-1.77961	-2.95651	5e-05	0.000456756	yes
	aceF	U00096.3:125694-127587		195.141	230.097	217.823	175.559	69.2082		0.237729	0.399777	0.45865	0.633415	no		0.15864	0.264469	0.62405	0.76742	no		-0.152556	-0.254592	0.63885	0.778235	no		-1.4955	-2.51104	5e-05	0.000456756	yes
	lpd	U00096.3:127911-129336		552.459	503.082	659.818	463.253	398.861		-0.135075	-0.256871	0.6672	0.799399	no		0.256201	0.46986	0.41965	0.598202	no		-0.254068	-0.479468	0.41935	0.59795	no		-0.469982	-0.886373	0.1397	0.285546	no
	yacH	U00096.3:129406-131260		0.10822	0.273236	0.959833	0.990907	0.96658		1.33618	0	1	1	no		3.14881	0	1	1	no		3.19478	0	1	1	no		3.15892	0	1	1	no
	acnB	U00096.3:131614-134212		130.538	114.487	86.3104	101.692	163.124		-0.189278	-0.428692	0.5048	0.673269	no		-0.596861	-1.39649	0.03895	0.112533	no		-0.360268	-0.84266	0.19815	0.361827	no		0.321503	0.765676	0.2724	0.446261	no
	yacL	U00096.3:134387-134750		37.2384	49.1274	21.3166	33.2234	39.6148		0.399737	0.712991	0.22905	0.398134	no		-0.804812	-1.24908	0.03455	0.102469	no		-0.164595	-0.281382	0.63245	0.773576	no		0.0892491	0.155185	0.7912	0.88183	no
	speD	U00096.3:134787-135582		98.7136	145.503	243.147	198.861	152.771		0.559729	1.23509	0.0414	0.117756	no		1.30051	2.7816	5e-05	0.000456756	yes		1.01044	2.16126	0.00015	0.00122022	yes		0.630054	1.34869	0.022	0.0723343	no
	speE	U00096.3:135597-136464		59.8479	106.936	166.325	149.947	110.385		0.83737	1.85009	0.0018	0.0100316	yes		1.47463	3.1652	5e-05	0.000456756	yes		1.32508	2.85845	5e-05	0.000456756	yes		0.883167	1.89488	0.0009	0.00568859	yes
	yacC	U00096.3:136569-136917		37.3062	35.3601	22.5546	28.501	29.3664		-0.0772903	-0.128158	0.8234	0.901167	no		-0.725994	-1.08613	0.0611	0.157542	no		-0.388402	-0.617812	0.2787	0.453587	no		-0.345247	-0.553698	0.3297	0.508595	no
	cueO	U00096.3:137082-138633		7.5239	8.5819	14.374	11.6534	13.979		0.189815	0.402003	0.52175	0.68769	no		0.93391	2.04063	0.0013	0.00769953	yes		0.631196	1.39771	0.02875	0.0890135	no		0.893709	1.92231	0.0018	0.0100316	yes
	gcd	U00096.3:138834-141225		5.37369	14.8534	14.3712	11.5264	3.38651		1.4668	3.20526	5e-05	0.000456756	yes		1.4192	3.04533	5e-05	0.000456756	yes		1.10095	2.2598	0.00015	0.00122022	yes		-0.666115	-1.29965	0.02755	0.0861079	no
	hpt	U00096.3:141430-141967		70.5204	90.6946	55.4334	48.9525	36.561		0.362976	0.832057	0.17615	0.334562	no		-0.347286	-0.776397	0.2064	0.371587	no		-0.526658	-1.19432	0.05775	0.151066	no		-0.947734	-2.09894	0.0009	0.00568859	yes
	can	U00096.3:142007-142670		86.5179	54.1525	45.3569	69.5364	68.4657		-0.675969	-1.55646	0.01025	0.0399572	yes		-0.931677	-2.10581	0.00085	0.0054162	yes		-0.31523	-0.707884	0.23195	0.401422	no		-0.337616	-0.779558	0.1946	0.357868	no
	yadG	U00096.3:142778-144472		19.1783	23.3501	29.5885	32.0327	23.0685		0.283953	0.497873	0.412	0.590993	no		0.625559	1.11063	0.0655	0.166141	no		0.740067	1.30271	0.0287	0.0889052	no		0.266449	0.466586	0.4432	0.619862	no
	yadH	U00096.3:142778-144472		12.983	15.758	19.3175	20.4579	15.1889		0.279464	0.357166	0.5506	0.710993	no		0.573285	0.7426	0.2209	0.388589	no		0.656036	0.800108	0.17295	0.330366	no		0.226388	0.287874	0.6284	0.770761	no
	yadI	U00096.3:144576-145017		13.8551	14.1001	31.5025	32.7674	39.8664		0.0252901	0.0363964	0.95775	0.97494	no		1.18505	1.85171	0.0024	0.0126323	yes		1.24185	1.96455	0.0015	0.0086619	yes		1.52476	2.4262	0.0003	0.00222065	yes
	yadE	U00096.3:145080-146310		3.19864	2.74602	5.44078	6.11555	5.55905		-0.22012	-0.339143	0.57265	0.728028	no		0.766353	1.27415	0.03565	0.105001	no		0.935022	1.61011	0.0111	0.0425188	yes		0.797379	1.32255	0.02895	0.0894977	no
	panD	U00096.3:146313-146694		112.755	105.985	60.2747	51.142	70.6406		-0.0893431	-0.184197	0.75465	0.858255	no		-0.903574	-1.79819	0.00245	0.0128398	yes		-1.14062	-2.27238	0.00025	0.00190147	yes		-0.674629	-1.34625	0.02085	0.0693656	no
	yadD	U00096.3:146967-147870		19.257	9.95246	23.4585	13.2329	14.1622		-0.952256	-1.97926	0.0025	0.0130646	yes		0.28473	0.60111	0.32975	0.508657	no		-0.541251	-1.06382	0.07545	0.184593	no		-0.44334	-0.947835	0.1257	0.265244	no
	panC	U00096.3:147943-148795		109.501	77.33	50.4649	36.9574	49.4237		-0.501844	-1.11736	0.05445	0.144769	no		-1.11759	-2.4503	5e-05	0.000456756	yes		-1.56701	-3.41941	5e-05	0.000456756	yes		-1.14767	-2.51063	5e-05	0.000456756	yes
	panB	U00096.3:148806-149601		48.3499	33.5826	22.8824	22.8336	22.3788		-0.525797	-1.17911	0.0566	0.148824	no		-1.07927	-2.26877	0.0002	0.00156767	yes		-1.08235	-2.36084	5e-05	0.000456756	yes		-1.11138	-2.35208	5e-05	0.000456756	yes
	yadC	U00096.3:149714-150953		1.14592	1.56167	3.63066	3.86254	5.41894		0.446587	0	1	1	no		1.66373	1.96836	0.0021	0.0113662	yes		1.75305	2.13664	0.0012	0.00723499	yes		2.24151	2.75559	0.00025	0.00190147	yes
	yadK	U00096.3:151002-151599		0.440615	1.16473	11.1598	10.9312	11.5582		1.40241	0	1	1	no		4.66265	2.4603	0.0514	0.138468	no		4.63279	2.43906	0.0514	0.138468	no		4.71325	2.48689	0.0514	0.138468	no
	yadL	U00096.3:151625-152231		0.343284	1.3918	1.75308	10.4319	8.52257		2.01948	0	1	1	no		2.35242	0	1	1	no		4.92545	2.9664	0.1059	0.234961	no		4.63381	2.76712	0.1059	0.234961	no
	yadM	U00096.3:152242-152812		0.56494	0.525634	6.87691	8.12713	8.47492		-0.104038	0	1	1	no		3.60559	2.20455	0.042	0.119018	no		3.84658	2.36965	0.04195	0.118946	no		3.90703	2.39678	0.04195	0.118946	no
	htrE	U00096.3:152828-155426		0.345786	0.519465	1.32118	1.64964	1.60319		0.587145	0	1	1	no		1.93387	0	1	1	no		2.25419	0	1	1	no		2.21299	0	1	1	no
	yadV	U00096.3:155460-156201		0.176904	0.865745	1.02999	1.68426	0.668967		2.29098	0	1	1	no		2.54159	0	1	1	no		3.25108	0	1	1	no		1.91897	0	1	1	no
	yadN	U00096.3:156298-156883		0.422928	0.458137	0.764302	2.07247	0.85709		0.115366	0	1	1	no		0.853731	0	1	1	no		2.29287	0	1	1	no		1.01904	0	1	1	no
	folK	U00096.3:157252-159126		13.7052	23.9876	16.4059	16.346	12.2498		0.807568	0.488677	0.426	0.604331	no		0.259496	0.152707	0.7891	0.880556	no		0.254215	0.140641	0.80885	0.892605	no		-0.161955	-0.0886124	0.8814	0.934168	no
	pcnB	U00096.3:157252-159126		48.2202	65.22	40.2825	42.7199	39.0066		0.435676	0.947996	0.1112	0.2433	no		-0.259485	-0.556014	0.3439	0.52352	no		-0.17473	-0.377558	0.51875	0.685481	no		-0.305919	-0.662093	0.2607	0.433673	no
	gluQ	U00096.3:159185-160112		8.62618	8.60158	6.86325	10.2239	11.0237		-0.00412134	-0.00681427	0.98425	0.988594	no		-0.329832	-0.518463	0.34865	0.528564	no		0.245154	0.403999	0.46365	0.638041	no		0.353812	0.592954	0.2788	0.453708	no
	dksA	U00096.3:160148-160604		733.1	478.999	539.124	374.262	580.714		-0.613987	-1.31453	0.0259	0.082008	no		-0.443393	-0.93014	0.10685	0.23645	no		-0.969962	-2.03374	0.0006	0.00405268	yes		-0.336183	-0.709172	0.2238	0.391933	no
	sfsA	U00096.3:160781-161486		52.5382	32.4453	15.3624	15.2746	20.8829		-0.695356	-1.46232	0.01295	0.047969	yes		-1.77396	-3.53063	5e-05	0.000456756	yes		-1.78223	-3.54395	5e-05	0.000456756	yes		-1.33104	-2.72555	5e-05	0.000456756	yes
	ligT	U00096.3:161500-162031		9.46935	2.23037	2.0179	3.20891	3.04484		-2.08598	-2.30443	0.00555	0.0246144	yes		-2.23041	-2.35738	0.0056	0.0247641	yes		-1.56118	-1.73766	0.0103	0.0400994	yes		-1.6369	-1.85911	0.0087	0.0351532	yes
	hrpB	U00096.3:162104-164534		6.08954	6.11619	4.09147	5.81337	4.91364		0.00629966	0.0136947	0.9845	0.988652	no		-0.573713	-1.14765	0.05035	0.136342	no		-0.0669603	-0.141424	0.808	0.892036	no		-0.309542	-0.663233	0.27105	0.444678	no
	mrcB	U00096.3:164729-167264		7.26015	9.80356	5.02194	6.42775	6.82713		0.433305	0.932826	0.11625	0.251125	no		-0.531755	-1.09436	0.0683	0.171336	no		-0.175686	-0.377293	0.5345	0.698281	no		-0.0887208	-0.18666	0.74895	0.854469	no
	fhuA	U00096.3:167483-169727		20.6362	9.05239	3.86129	2.33453	1.62542		-1.18881	-2.73228	5e-05	0.000456756	yes		-2.41802	-4.88615	5e-05	0.000456756	yes		-3.14398	-6.17763	5e-05	0.000456756	yes		-3.66629	-6.52143	5e-05	0.000456756	yes
	fhuB	U00096.3:169777-173444		2.65635	3.0786	1.42037	1.82288	1.14366		0.212828	0.243792	0.67815	0.806936	no		-0.903176	-0.754579	0.17265	0.329959	no		-0.54323	-0.599254	0.28695	0.462596	no		-1.21579	-1.27742	0.0332	0.0993597	no
	fhuC	U00096.3:169777-173444		9.5702	4.32803	3.37878	1.89456	1.47191		-1.14484	-0.985343	0.0736	0.181289	no		-1.50204	-1.42292	0.025	0.0796928	no		-2.33668	-1.96175	0.00415	0.0195549	yes		-2.70086	-2.14606	0.0085	0.0345335	yes
	fhuD	U00096.3:169777-173444		4.1531	2.29991	1.67508	0.879316	1.83535		-0.852608	-0.612541	0.32355	0.502436	no		-1.30996	-0.925716	0.1464	0.294401	no		-2.23974	-1.2831	0.11265	0.245536	no		-1.17813	-0.95103	0.1313	0.273288	no
	hemL	U00096.3:173601-174882		34.9891	38.4348	31.5791	26.4918	27.9311		0.135508	0.303245	0.60305	0.75119	no		-0.147938	-0.322392	0.57805	0.732241	no		-0.40136	-0.880838	0.1238	0.26246	no		-0.325034	-0.715518	0.21745	0.384601	no
	clcA	U00096.3:175106-176528		8.05447	7.99239	5.85846	5.45057	4.87326		-0.0111621	-0.0222867	0.96425	0.978243	no		-0.459269	-0.865771	0.1409	0.287195	no		-0.563381	-1.06253	0.0771	0.187435	no		-0.724904	-1.35512	0.02485	0.0793142	no
	erpA	U00096.3:176609-176954		136.06	250.402	134.34	140.75	93.5882		0.88001	1.86193	0.00135	0.00793837	yes		-0.0183444	-0.0381295	0.9497	0.970794	no		0.0488926	0.104486	0.8586	0.921648	no		-0.53984	-1.08103	0.0561	0.147896	no
	yadS	U00096.3:177000-177624		6.43601	11.2681	4.17829	8.57089	7.03749		0.808012	1.18016	0.0382	0.110889	no		-0.623253	-0.744292	0.1859	0.346698	no		0.41328	0.573434	0.3139	0.492135	no		0.128896	0.177517	0.7535	0.857386	no
	btuF	U00096.3:177661-179153		11.608	11.2914	7.49097	8.11069	7.66603		-0.0398916	-0.0398302	0.94625	0.968938	no		-0.631897	-0.606919	0.29315	0.469427	no		-0.517224	-0.487189	0.39455	0.57471	no		-0.59857	-0.590972	0.30865	0.486492	no
	mtn	U00096.3:177661-179153		35.3725	40.2019	30.2773	29.8727	16.8765		0.184637	0.367869	0.57195	0.727364	no		-0.224389	-0.423329	0.4901	0.6607	no		-0.2438	-0.460605	0.4793	0.65126	no		-1.06761	-1.88072	0.0039	0.018642	yes
	dgt	U00096.3:179236-180754		7.53174	2.82305	3.7468	2.88509	4.96616		-1.41573	-2.49236	0.00015	0.00122022	yes		-1.00733	-1.93038	0.0031	0.0154753	yes		-1.38437	-3.01075	5e-05	0.000456756	yes		-0.600853	-1.12953	0.06065	0.156753	no
	degP	U00096.3:180883-182308		42.7089	701.287	5917.57	9369.63	8115.03		4.0374	8.22833	5e-05	0.000456756	yes		7.11432	12.0094	5e-05	0.000456756	yes		7.77731	11.9877	5e-05	0.000456756	yes		7.56992	11.6104	5e-05	0.000456756	yes
	cdaR	U00096.3:182462-183620		6.86279	14.1824	107.385	151.571	121.409		1.04724	1.94498	0.0011	0.00673872	yes		3.96785	7.38073	5e-05	0.000456756	yes		4.46506	8.24119	5e-05	0.000456756	yes		4.14494	7.69739	5e-05	0.000456756	yes
	yaeH	U00096.3:183708-184095		33.8657	14.2521	18.535	18.8712	17.3618		-1.24866	-1.90137	0.00345	0.0168797	yes		-0.869576	-1.41307	0.02055	0.0686072	no		-0.843637	-1.37857	0.0225	0.0735431	no		-0.963909	-1.47738	0.0143	0.0517162	no
	yaeI	U00096.3:184256-185069		3.3749	0.976501	1.82065	1.19481	1.18645		-1.78915	-1.85653	0.0111	0.0425188	yes		-0.890393	-1.16176	0.1166	0.251677	no		-1.49806	-1.78114	0.02565	0.0813564	no		-1.50819	-1.86887	0.02575	0.0816299	no
	dapD	U00096.3:185122-185947		103.446	94.0804	52.6258	38.2226	27.6706		-0.136909	-0.317356	0.6047	0.752524	no		-0.975033	-2.15458	0.00035	0.00253827	yes		-1.43638	-3.37697	5e-05	0.000456756	yes		-1.90245	-4.30233	5e-05	0.000456756	yes
	glnD	U00096.3:185977-188650		4.96132	4.49031	3.12491	3.27125	2.59163		-0.143908	-0.302392	0.617	0.762424	no		-0.66691	-1.31098	0.02315	0.0751565	no		-0.60088	-1.19963	0.04985	0.135373	no		-0.93686	-1.81253	0.0028	0.0142743	yes
	map	U00096.3:188711-189506		56.2741	63.4903	28.6538	27.5173	22.7682		0.174063	0.392748	0.50445	0.672953	no		-0.973748	-2.11716	0.0004	0.00285164	yes		-1.03213	-2.18626	0.00025	0.00190147	yes		-1.30545	-2.71137	5e-05	0.000456756	yes
	tff	U00096.3:189711-189847		4174.59	6514.01	8346.68	10565.2	6395.46		0.641911	1.41385	0.0184	0.0629421	no		0.999568	2.1499	0.0001	0.000855768	yes		1.33962	2.86356	5e-05	0.000456756	yes		0.615414	1.32766	0.01955	0.0660709	no
	rpsB	U00096.3:189873-190599		1014.45	1664.12	1908.33	1408.11	1165.34		0.714064	1.43983	0.02375	0.0766565	no		0.911619	1.76183	0.0044	0.0204208	yes		0.473069	0.950445	0.1239	0.262599	no		0.200054	0.394286	0.51545	0.682507	no
	tsf	U00096.3:190856-191708		422.548	651.62	817.406	657.762	446.784		0.624918	1.27863	0.03515	0.103855	no		0.951939	1.83872	0.0024	0.0126323	yes		0.638451	1.26879	0.0383	0.111125	no		0.0804628	0.162489	0.7898	0.881135	no
	pyrH	U00096.3:191854-192580		69.2405	138.622	169.989	136.599	104.602		1.00147	2.25112	0.00025	0.00190147	yes		1.29576	2.86057	5e-05	0.000456756	yes		0.980258	2.05158	0.0006	0.00405268	yes		0.595223	1.31497	0.02415	0.0776188	no
	frr	U00096.3:192871-193429		438.286	524.093	431.268	414.177	283.709		0.25795	0.520135	0.3529	0.532977	no		-0.0232892	-0.0475725	0.93455	0.962352	no		-0.0816254	-0.166661	0.77385	0.870257	no		-0.627461	-1.27862	0.027	0.0847165	no
	dxr	U00096.3:193520-194717		13.7978	22.4029	24.0544	22.9069	15.863		0.699241	1.52303	0.01265	0.0471129	yes		0.801861	1.6838	0.005	0.0226458	yes		0.73134	1.55385	0.00975	0.0384152	yes		0.201226	0.422801	0.47645	0.649057	no
	ispU	U00096.3:194902-195664		35.1618	50.6002	51.1929	70.2698	56.5315		0.525132	1.16143	0.05075	0.137161	no		0.541932	1.17898	0.0428	0.120753	no		0.998895	2.22953	0.00015	0.00122022	yes		0.685044	1.48417	0.01105	0.0423698	yes
	cdsA	U00096.3:195676-196534		55.3552	77.0997	98.3403	95.9864	70.3179		0.478007	1.08861	0.07145	0.17732	no		0.829064	1.84999	0.00165	0.00934994	yes		0.794111	1.76569	0.00315	0.0156736	yes		0.345173	0.776593	0.181	0.340946	no
	rseP	U00096.3:196545-197898		69.6992	614.58	2023.01	2332.08	1457.61		3.14039	6.49595	5e-05	0.000456756	yes		4.85922	9.33789	5e-05	0.000456756	yes		5.06433	10.48	5e-05	0.000456756	yes		4.38632	8.36836	5e-05	0.000456756	yes
	bamA	U00096.3:197927-200360		88.0846	413.822	2799.72	3159.58	2088.94		2.23205	4.4615	5e-05	0.000456756	yes		4.99025	8.3137	5e-05	0.000456756	yes		5.1647	8.60485	5e-05	0.000456756	yes		4.56773	7.94309	5e-05	0.000456756	yes
	skp (hlpA, ompH)	U00096.3:200481-200967		152.98	373.608	3087.67	6215.01	3684.43		1.28818	2.97139	5e-05	0.000456756	yes		4.3351	8.92137	5e-05	0.000456756	yes		5.34434	10.5639	5e-05	0.000456756	yes		4.59003	9.18702	5e-05	0.000456756	yes
	lpxD	U00096.3:200970-201996		119.916	270.394	2432.01	3787.5	2445.7		1.17303	2.50925	0.0001	0.000855768	yes		4.34205	8.13978	5e-05	0.000456756	yes		4.98114	9.6325	5e-05	0.000456756	yes		4.35015	8.14062	5e-05	0.000456756	yes
	fabZ	U00096.3:202100-202556		201	454.13	2074.61	2513.71	1923.66		1.17591	2.61023	5e-05	0.000456756	yes		3.36758	6.78086	5e-05	0.000456756	yes		3.64455	6.74825	5e-05	0.000456756	yes		3.25859	6.57269	5e-05	0.000456756	yes
	lpxA	U00096.3:202559-205089		180.433	257.858	1335.42	2450.08	1552.11		0.515113	0.844259	0.1466	0.294703	no		2.88776	4.23869	5e-05	0.000456756	yes		3.76329	5.58692	5e-05	0.000456756	yes		3.1047	4.72629	5e-05	0.000456756	yes
	lpxB	U00096.3:202559-205089		30.3385	66.9119	398.589	378.283	243.413		1.14111	0.899282	0.1256	0.265127	no		3.71568	2.74436	0.0001	0.000855768	yes		3.64024	2.38837	0.00035	0.00253827	yes		3.00418	2.03034	0.0026	0.0134579	yes
	rnhB	U00096.3:202559-205089		14.0683	33.4168	186.484	183.5	147.732		1.24812	0.521804	0.5373	0.700381	no		3.72853	1.48111	0.3084	0.486156	no		3.70525	1.34735	0.3484	0.52826	no		3.39246	1.25056	0.4305	0.608449	no
	dnaE	U00096.3:205125-208608		15.7204	32.6515	149.075	169.894	132.128		1.05451	2.28282	0.00025	0.00190147	yes		3.24533	6.57345	5e-05	0.000456756	yes		3.43392	6.96192	5e-05	0.000456756	yes		3.07123	6.27334	5e-05	0.000456756	yes
	accA	U00096.3:208620-209580		113.424	139.282	341.346	436.42	402.497		0.296279	0.665961	0.27775	0.452579	no		1.5895	3.3617	5e-05	0.000456756	yes		1.94399	4.1254	5e-05	0.000456756	yes		1.82725	3.86996	5e-05	0.000456756	yes
	ldcC	U00096.3:209678-211820		2.44409	4.40494	5.90998	10.7508	8.7134		0.849826	1.54426	0.0146	0.0525482	no		1.27386	2.32906	0.0002	0.00156767	yes		2.13708	4.04223	5e-05	0.000456756	yes		1.83394	3.44149	5e-05	0.000456756	yes
	yaeR	U00096.3:211876-212266		13.3598	9.47438	11.3562	9.15156	12.2201		-0.495792	-0.618621	0.29	0.465908	no		-0.234414	-0.291419	0.62765	0.770284	no		-0.545806	-0.656632	0.26555	0.438731	no		-0.128637	-0.164737	0.7779	0.872953	no
	tilS	U00096.3:212330-213629		5.89929	5.37855	5.878	3.86717	5.79264		-0.133323	-0.232088	0.68985	0.814931	no		-0.0052163	-0.0091609	0.98115	0.986886	no		-0.609262	-1.02236	0.0882	0.206378	no		-0.0263183	-0.0463784	0.94255	0.96695	no
	rof	U00096.3:213677-214125		132.181	89.7525	56.7809	40.0938	44.9524		-0.558491	-0.975905	0.1207	0.257825	no		-1.21904	-1.97808	0.00235	0.0124329	yes		-1.72107	-2.56596	0.0004	0.00285164	yes		-1.55605	-2.43135	0.0002	0.00156767	yes
	yaeP	U00096.3:213677-214125		104.076	47.7441	17.6119	30.8656	19.4417		-1.12424	-0.82674	0.1565	0.308307	no		-2.56302	-2.26252	0.1011	0.227501	no		-1.75357	-1.08941	0.13795	0.282955	no		-2.42042	-1.31215	0.0872	0.204765	no
	arfB	U00096.3:214290-215255		9.57324	6.63932	7.01537	10.2767	16.4493		-0.527972	-0.487927	0.4415	0.618311	no		-0.448487	-0.404938	0.5093	0.67712	no		0.102303	0.0904791	0.88685	0.93691	no		0.780943	0.830672	0.2019	0.366254	no
	yaeQ	U00096.3:214290-215255		14.5157	11.2465	7.00129	11.2697	10.4724		-0.368136	-0.629884	0.35115	0.531146	no		-1.05192	-1.40758	0.0343	0.10188	no		-0.365155	-0.561416	0.39705	0.577012	no		-0.471016	-0.704072	0.27345	0.447541	no
	nlpE	U00096.3:215268-215979		12.5548	9.16837	10.7787	10.2201	13.6501		-0.453504	-0.793565	0.1955	0.35888	no		-0.220056	-0.388056	0.50445	0.672953	no		-0.296825	-0.516553	0.38695	0.56728	no		0.120668	0.221615	0.7105	0.828536	no
	yaeF	U00096.3:216178-217003		2.31884	1.34437	2.16011	3.58276	2.52701		-0.786468	-0.759163	0.19505	0.358436	no		-0.102293	-0.11139	0.84875	0.915925	no		0.627671	0.729118	0.21015	0.376016	no		0.124029	0.138063	0.81535	0.896735	no
	proS	U00096.3:217056-218775		68.0311	95.0311	73.1344	61.7449	55.3904		0.482204	1.02755	0.076	0.185564	no		0.104354	0.218177	0.6997	0.82169	no		-0.139876	-0.297902	0.6135	0.759877	no		-0.296558	-0.63682	0.27155	0.445224	no
	rcsF	U00096.3:218886-219995		67.2729	62.8685	52.8037	50.7207	41.4673		-0.0976882	-0.175822	0.7829	0.876296	no		-0.349387	-0.588391	0.3349	0.514015	no		-0.40745	-0.643314	0.29245	0.46856	no		-0.69805	-1.08877	0.0762	0.185942	no
	tsaA	U00096.3:218886-219995		19.0329	22.4756	11.1709	20.4903	16.3477		0.239866	0.322826	0.5754	0.729993	no		-0.768754	-0.849453	0.1467	0.294826	no		0.10645	0.140743	0.8129	0.895185	no		-0.219405	-0.278713	0.6408	0.779571	no
	metQ	U00096.3:220112-220928		37.0413	34.1018	31.0579	28.9972	33.8136		-0.119287	-0.269179	0.6596	0.793985	no		-0.254174	-0.559504	0.3461	0.525894	no		-0.353222	-0.785373	0.191	0.35349	no		-0.131528	-0.291714	0.62855	0.770874	no
	metI	U00096.3:220967-222645		18.4497	22.7326	23.7922	20.6023	18.6327		0.301164	0.41555	0.4819	0.653594	no		0.366889	0.509032	0.3798	0.560278	no		0.159203	0.20614	0.72705	0.840158	no		0.0142361	0.0188318	0.97205	0.982066	no
	metN	U00096.3:220967-222645		12.1429	16.2036	10.7664	17.9846	15.3627		0.416203	0.648983	0.2658	0.439008	no		-0.17358	-0.244711	0.66505	0.797988	no		0.566652	0.897376	0.12575	0.265297	no		0.339317	0.526956	0.36495	0.544897	no
	gmhB	U00096.3:222832-223408		40.2579	26.1066	17.0176	16.7699	15.481		-0.624854	-1.29201	0.0299	0.0917381	no		-1.24225	-2.42038	5e-05	0.000456756	yes		-1.2634	-2.49437	5e-05	0.000456756	yes		-1.37877	-2.64009	0.0001	0.000855768	yes
	rrsH	U00096.3:223770-225312		0	0	0	0	0		0	0	1	1	no		0	0	1	1	no		0	0	1	1	no		0	0	1	1	no
	ileV	U00096.3:225380-225457		1762550	2570090	1455980	2773740	1282720		0.544155	0.933132	0.1723	0.329479	no		-0.275679	-0.464347	0.4497	0.625476	no		0.65417	1.08891	0.0881	0.206261	no		-0.458462	-0.773684	0.21485	0.381673	no
	alaV	U00096.3:225499-225575		3090750	3854480	11115700	4605150	2207090		0.31858	0.716924	0.48705	0.658202	no		1.84657	3.30913	5e-05	0.000456756	yes		0.575292	1.31763	0.1667	0.321851	no		-0.48581	-0.966974	0.2633	0.436243	no
	rrlH	U00096.3:225758-228662		0	0	0	0	0		0	0	1	1	no		0	0	1	1	no		0	0	1	1	no		0	0	1	1	no
	rrfH	U00096.3:228755-228875		0	0	0	0	0		0	0	1	1	no		0	0	1	1	no		0	0	1	1	no		0	0	1	1	no
	aspU	U00096.3:228927-229004		23973300	27733300	45699700	34393900	25304900		0.210191	3.53529	0.67305	0.803664	no		0.930755	28.1443	0.0297	0.0912819	no		0.520725	15.0215	0.1922	0.354947	no		0.0779881	2.46035	0.84865	0.915854	no
	dkgB	U00096.3:229166-230881		4.64152	5.25838	2.9152	3.80241	2.67656		0.180023	0.160044	0.7811	0.875144	no		-0.671001	-0.535895	0.37405	0.554464	no		-0.287683	-0.249403	0.68985	0.814931	no		-0.794216	-0.6434	0.29485	0.471159	no
	yafC	U00096.3:229166-230881		11.129	6.82796	3.82027	5.78079	5.55914		-0.704795	-0.929841	0.1301	0.271723	no		-1.54257	-1.8228	0.00495	0.0224632	yes		-0.944982	-1.24355	0.04265	0.120463	no		-1.00139	-1.36693	0.0263	0.0829986	no
	yafD	U00096.3:231121-231922		22.6321	7.10868	10.0834	29.4561	22.8645		-1.67072	-2.98627	5e-05	0.000456756	yes		-1.16639	-2.17891	0.0002	0.00156767	yes		0.380195	0.776934	0.193	0.355969	no		0.0147421	0.0301086	0.96045	0.976351	no
	yafE	U00096.3:231925-232549		9.79741	10.647	9.7659	24.2389	19.604		0.11997	0.192232	0.74195	0.849846	no		-0.00464658	-0.00742484	0.97265	0.982356	no		1.30685	2.29036	0.0003	0.00222065	yes		1.00068	1.73602	0.0052	0.0233494	yes
	mltD	U00096.3:232596-233955		52.0916	102.143	56.0161	32.2372	26.4726		0.971475	2.05862	0.00045	0.00315248	yes		0.104791	0.221056	0.6977	0.820335	no		-0.692323	-1.47944	0.0099	0.038877	yes		-0.976548	-2.0277	0.0004	0.00285164	yes
	gloB	U00096.3:234026-234782		16.8995	14.7669	8.75477	8.09729	13.5724		-0.194611	-0.369846	0.5473	0.708409	no		-0.948835	-1.66676	0.00775	0.0321001	yes		-1.06147	-1.84645	0.0029	0.0146775	yes		-0.316298	-0.589699	0.3284	0.507206	no
	rnhA	U00096.3:234815-236002		14.1713	12.6597	7.40685	7.28726	11.6251		-0.162739	-0.164974	0.77385	0.870257	no		-0.936046	-0.838856	0.14495	0.292555	no		-0.959529	-0.869379	0.16725	0.322644	no		-0.285739	-0.304591	0.5856	0.738263	no
	yafS	U00096.3:234815-236002		13.2235	4.76758	3.3504	7.13409	4.78212		-1.47178	-1.6748	0.01305	0.0482589	yes		-1.9807	-2.16175	0.0063	0.0272806	yes		-0.890302	-1.24942	0.04605	0.127481	no		-1.46738	-1.93513	0.0034	0.0166933	yes
	dnaQ	U00096.3:236066-236798		19.412	21.1595	11.0176	12.3572	11.4045		0.124355	0.278914	0.671	0.80233	no		-0.817138	-1.58357	0.00975	0.0384152	yes		-0.651594	-1.28465	0.03865	0.111885	no		-0.76735	-1.5605	0.01765	0.0609235	no
	aspV	U00096.3:236930-237007		26337200	27921300	45970600	31148900	25023000		0.0842607	3.70006	0.86325	0.924113	no		0.803608	54.5963	0.0503	0.136228	no		0.242077	16.4703	0.53285	0.69693	no		-0.0738473	-5.00041	0.855	0.919433	no
	yafT	U00096.3:237334-238120		0.646888	1.85921	1.60698	1.87971	0.764124		1.52311	0	1	1	no		1.31276	0	1	1	no		1.53892	0	1	1	no		0.240292	0	1	1	no
	ykfM	U00096.3:238256-238736		0	0	0.251065	0.56475	0		0	0	1	1	no		inf	0	1	1	no		inf	0	1	1	no		0	0	1	1	no
	yafU	U00096.3:238745-239102		0.392506	0.725125	2.6698	2.35647	2.86965		0.885514	0	1	1	no		2.76594	0	1	1	no		2.58584	0	1	1	no		2.87009	0.923798	0.1904	0.352747	no
	yafF	U00096.3:239105-239378		4.572	5.11238	9.26781	13.4152	12.5721		0.161169	0.126482	0.88225	0.93462	no		1.0194	1.31608	0.27165	0.44532	no		1.55297	1.5607	0.1067	0.236206	no		1.45933	1.50256	0.11265	0.245536	no
	yafV	U00096.3:239418-240189		8.73964	4.66465	2.24466	2.31859	4.0009		-0.905804	-1.39932	0.026	0.0822513	no		-1.96108	-2.43443	0.00125	0.00746056	yes		-1.91433	-2.41385	0.0013	0.00769953	yes		-1.12725	-1.63133	0.00875	0.0353045	yes
	ivy	U00096.3:240342-240816		41.09	32.5865	22.7105	15.7645	19.5933		-0.334513	-0.648862	0.2659	0.439105	no		-0.855427	-1.5649	0.0075	0.0313102	yes		-1.3821	-2.38802	0.00025	0.00190147	yes		-1.06842	-1.92516	0.0015	0.0086619	yes
	fadE	U00096.3:240858-243303		5.59623	1.05343	0.795533	1.27279	5.37588		-2.40936	-3.87156	5e-05	0.000456756	yes		-2.81446	-4.11287	5e-05	0.000456756	yes		-2.13646	-3.55829	5e-05	0.000456756	yes		-0.0579541	-0.118985	0.84765	0.915238	no
	gmhA	U00096.3:243542-244121		68.9561	50.5654	26.6803	26.0537	27.4135		-0.447528	-0.962205	0.0939	0.215917	no		-1.3699	-2.78658	5e-05	0.000456756	yes		-1.40419	-2.86609	5e-05	0.000456756	yes		-1.33079	-2.72308	5e-05	0.000456756	yes
	yafJ	U00096.3:244326-245805		41.2602	34.0681	23.0642	27.0726	25.8458		-0.27633	-0.47692	0.42205	0.600628	no		-0.839092	-1.25854	0.0363	0.106445	no		-0.607917	-1.00645	0.08875	0.207365	no		-0.674819	-1.12694	0.0584	0.152355	no
	yafK	U00096.3:244326-245805		20.7866	28.0774	27.3203	25.0868	20.9621		0.433756	0.614926	0.3357	0.514828	no		0.39432	0.560451	0.38375	0.564108	no		0.271276	0.375263	0.5471	0.708274	no		0.01213	0.016725	0.9768	0.984645	no
	yafQ	U00096.3:245960-246239		50.0537	65.6606	57.3718	42.2855	41.8271		0.391551	0.661914	0.2625	0.435351	no		0.196863	0.324881	0.57355	0.728599	no		-0.243313	-0.368944	0.5122	0.679637	no		-0.25904	-0.402663	0.48845	0.659459	no
	dinJ	U00096.3:246241-246502		22.9052	20.6277	15.435	11.631	12.9883		-0.151095	-0.187033	0.7813	0.875295	no		-0.569467	-0.60176	0.30355	0.480969	no		-0.977705	-1.0378	0.11815	0.253903	no		-0.818459	-0.899833	0.16195	0.315685	no
	yafL	U00096.3:246711-247461		0.236548	0.293677	0.915911	0.412456	0.18396		0.312097	0	1	1	no		1.95307	0	1	1	no		0.802108	0	1	1	no		-0.362744	0	1	1	no
	rayT	U00096.3:247636-248134		11.3677	3.06637	4.74963	3.84277	5.21609		-1.89034	-1.92539	0.0042	0.0197329	yes		-1.25906	-1.55366	0.0126	0.0469693	yes		-1.56472	-1.83974	0.0098	0.0385552	yes		-1.1239	-1.38396	0.02495	0.079562	no
	lfhA	U00096.3:248357-250070		0.200469	0.192355	0.150322	0.456023	0.38346		-0.0596071	0	1	1	no		-0.415322	0	1	1	no		1.18573	0	1	1	no		0.935699	0	1	1	no
	lafU	U00096.3:250071-250827		0.370549	0.982844	1.10725	0.723003	1.52877		1.4073	0	1	1	no		1.57924	0	1	1	no		0.964337	0	1	1	no		2.04463	0	1	1	no
	dinB	U00096.3:250897-251953		2.29021	2.24786	2.68426	1.85225	3.39194		-0.0269276	0	1	1	no		0.229042	0.295515	0.6209	0.765081	no		-0.306206	0	1	1	no		0.566628	0.772845	0.19395	0.357042	no
	yafN	U00096.3:252004-252298		4.50446	7.5794	8.02351	3.23554	7.63327		0.750729	0.54766	0.33445	0.513487	no		0.832879	0.764131	0.30155	0.478867	no		-0.477347	-0.373426	0.61465	0.760859	no		0.760946	0.603901	0.33015	0.50898	no
	yafO	U00096.3:252300-252699		1.13369	3.94201	0.522109	3.97571	2.15527		1.79791	1.45614	0.07575	0.18509	no		-1.1186	0	1	1	no		1.81019	1.50978	0.06265	0.160622	no		0.926845	0	1	1	no
	yafP	U00096.3:252708-253161		0.646536	2.13137	2.98046	1.12154	3.30909		1.72098	0	1	1	no		2.20473	1.32117	0.196	0.359402	no		0.794683	0	1	1	no		2.35563	1.44437	0.1946	0.357868	no
	ykfJ	U00096.3:253478-253685		0.840251	0	0	0	3.91019		-inf	0	1	1	no		-inf	0	1	1	no		-inf	0	1	1	no		2.21835	0	1	1	no
	prfH	U00096.3:253701-254202		0	0	0	0.506528	0.311719		0	0	1	1	no		0	0	1	1	no		inf	0	1	1	no		inf	0	1	1	no
	pepD	U00096.3:254258-255716		87.0286	92.1384	50.9236	39.2208	39.6951		0.0823123	0.180033	0.763	0.863462	no		-0.773155	-1.75121	0.0054	0.0240632	yes		-1.14987	-2.64174	5e-05	0.000456756	yes		-1.13253	-2.6025	0.0001	0.000855768	yes
	gpt	U00096.3:255976-256435		38.9138	84.3978	56.2142	56.8265	41.238		1.11692	2.13052	0.0001	0.000855768	yes		0.530652	0.957747	0.0837	0.198946	no		0.546282	1.02484	0.07455	0.183029	no		0.0836911	0.151342	0.7826	0.876144	no
	frsA	U00096.3:256526-257771		12.714	9.35655	8.10658	4.62726	5.93206		-0.44237	-0.906825	0.13405	0.277313	no		-0.649254	-1.24388	0.0387	0.111975	no		-1.45819	-2.7161	0.0001	0.000855768	yes		-1.09981	-2.10833	0.00115	0.00698724	yes
	crl	U00096.3:257828-259006		47.2566	37.9828	36.6843	43.6256	47.1606		-0.31517	-0.695927	0.219	0.386356	no		-0.365352	-0.79798	0.16215	0.315937	no		-0.115341	-0.2556	0.6495	0.786406	no		-0.00293335	-0.00644354	0.99005	0.991779	no
	phoE	U00096.3:259044-260100		1.50697	0.465088	0.70592	0.682606	0.661938		-1.69607	0	1	1	no		-1.09407	0	1	1	no		-1.14252	0	1	1	no		-1.18688	0	1	1	no
	proB	U00096.3:260387-261491		24.3869	19.8877	11.7906	12.8395	16.1452		-0.294232	-0.652759	0.2692	0.442773	no		-1.04847	-2.18678	0.0004	0.00285164	yes		-0.925518	-2.04058	0.0014	0.00818277	yes		-0.595008	-1.2988	0.0317	0.0960017	no
	proA	U00096.3:261502-262756		26.9541	23.493	11.8061	11.5193	17.4328		-0.198275	-0.453763	0.45055	0.626124	no		-1.19097	-2.66566	5e-05	0.000456756	yes		-1.22645	-2.80643	5e-05	0.000456756	yes		-0.6287	-1.40948	0.021	0.0697646	no
	thrW	U00096.3:262870-262946		4641870	6796210	7746540	7189580	7125410		0.550025	7.35664	0.2133	0.379931	no		0.738846	1.46381	0.10595	0.235043	no		0.631202	1.04972	0.1724	0.329623	no		0.618267	2.92551	0.17885	0.338029	no
	ykfN	U00096.3:263149-263212		0	0	0	0	76.3898		0	0	1	1	no		0	0	1	1	no		0	0	1	1	no		inf	0	1	1	no
	ykfI	U00096.3:263327-263669		0.571315	0	0.912223	0.883105	0.35815		-inf	0	1	1	no		0.675101	0	1	1	no		0.628299	0	1	1	no		-0.673723	0	1	1	no
	yafW	U00096.3:263689-264007		3.20176	0	0	2.36647	0.919478		-inf	0	1	1	no		-inf	0	1	1	no		-0.436125	0	1	1	no		-1.79998	0	1	1	no
	ykfH	U00096.3:264025-264247		0	1.11193	6.86301	9.7311	6.33258		inf	0	1	1	no		inf	nan	0.0027	0.0138652	yes		inf	nan	0.0008	0.005153	yes		inf	nan	0.0132	0.0486517	yes
	ykfG	U00096.3:264255-264732		0	0	1.44249	3.06788	1.08797		0	0	1	1	no		inf	0	1	1	no		inf	nan	5e-05	0.000456756	yes		inf	0	1	1	no
	yafX	U00096.3:264747-265206		0.589529	0.329788	0	3.5636	2.88843		-0.838022	0	1	1	no		-inf	0	1	1	no		2.5957	1.67418	0.1089	0.239683	no		2.29265	1.43892	0.1315	0.273533	no
	ykfF	U00096.3:265303-265543		1.54591	0	0	2.94346	3.37513		-inf	0	1	1	no		-inf	0	1	1	no		0.929059	0	1	1	no		1.12649	0	1	1	no
	ykfB	U00096.3:265619-266087		10.5863	7.34906	14.0069	12.803	19.6175		-0.526567	-0.671342	0.2354	0.405197	no		0.403936	0.581087	0.3075	0.485124	no		0.274281	0.380623	0.5056	0.673982	no		0.889941	1.32028	0.0251	0.0799543	no
	yafY	U00096.3:266109-266774		6.81548	8.95492	17.3926	13.5591	10.998		0.393864	0.439	0.47235	0.645287	no		1.35158	1.6435	0.02855	0.0885588	no		0.992376	1.12227	0.09935	0.2247	no		0.690359	0.76876	0.22175	0.389622	no
	ykfL	U00096.3:266109-266774		11.8162	4.63798	6.54405	9.92974	30.3509		-1.3492	-1.03048	0.47615	0.648765	no		-0.852517	-0.850829	0.6667	0.799105	no		-0.250944	-0.164744	0.88815	0.937503	no		1.36097	1.11243	0.27005	0.443651	no
	ykfK	U00096.3:266775-266967		4.59031	0	5.4043	0	5.69774		-inf	0	1	1	no		0.235516	0	1	1	no		-inf	0	1	1	no		0.311796	0	1	1	no
	yafZ	U00096.3:267183-268005		0.113058	0	1.46047	1.14153	1.47436		-inf	0	1	1	no		3.6913	0	1	1	no		3.33582	0	1	1	no		3.70495	0	1	1	no
	ykfA	U00096.3:268096-268960		1.84527	2.89002	1.93994	3.69429	2.23177		0.647248	0.769666	0.2213	0.389126	no		0.0721834	0	1	1	no		1.00147	1.2321	0.05765	0.150901	no		0.27436	0.305257	0.62035	0.764685	no
	perR	U00096.3:269288-270182		1.18071	0.827289	2.00003	2.01406	2.34048		-0.513192	0	1	1	no		0.760366	0	1	1	no		0.770449	0	1	1	no		0.987147	0.974786	0.129	0.270102	no
	insN	U00096.3:270277-272189		5.23092	6.05394	18.314	19.0106	20.1458		0.210809	0.262344	0.6911	0.815812	no		1.80781	2.69513	0.0008	0.005153	yes		1.86166	2.66484	0.00045	0.00315248	yes		1.94534	2.80947	0.0003	0.00222065	yes
	eyeA	U00096.3:272579-272654		0	0	59.9133	0	139.694		0	0	1	1	no		inf	0	1	1	no		0	0	1	1	no		inf	nan	0.0564	0.148466	no
	ykfC	U00096.3:272846-273954		1.63098	2.96291	7.6381	10.3624	10.4156		0.861279	1.06037	0.093	0.214495	no		2.22747	2.9986	0.0001	0.000855768	yes		2.66755	3.704	5e-05	0.000456756	yes		2.67494	3.66567	5e-05	0.000456756	yes
	mmuM	U00096.3:275324-277647		3.25352	1.9119	2.33958	2.06461	3.1353		-0.766997	-0.740954	0.23785	0.408189	no		-0.475753	-0.423332	0.49285	0.663218	no		-0.656133	-0.757518	0.269	0.442553	no		-0.0533986	-0.0656881	0.90645	0.947721	no
	mmuP	U00096.3:275324-277647		0.800929	0.584025	0.916433	1.20839	1.3903		-0.455644	0	1	1	no		0.194356	0	1	1	no		0.593335	0	1	1	no		0.795653	0	1	1	no
	afuC	U00096.3:277755-278802		0.28238	0.0522853	2.24515	0.983921	1.53457		-2.43316	0	1	1	no		2.9911	1.74427	0.0636	0.162558	no		1.8009	0	1	1	no		2.44212	0	1	1	no
	afuB	U00096.3:278813-279161		0.478846	1.52766	5.01464	2.33968	2.71476		1.67369	0	1	1	no		3.38851	1.45978	0.17115	0.327867	no		2.28868	0	1	1	no		2.50319	0.986233	0.1949	0.358259	no
	insX	U00096.3:280113-280362		72.1531	42.395	42.9384	32.7628	32.9884		-0.767169	-1.09249	0.06335	0.162043	no		-0.748793	-1.0702	0.06865	0.17202	no		-1.139	-1.54019	0.01255	0.0468288	yes		-1.1291	-1.48108	0.01315	0.0485177	yes
	yagB	U00096.3:280426-280735		29.3254	14.239	24.7615	18.5333	17.6138		-1.0423	-1.57805	0.0224	0.0733106	no		-0.244055	-0.380557	0.5548	0.714186	no		-0.662031	-0.96998	0.12155	0.258997	no		-0.73545	-1.11619	0.09075	0.2108	no
	yagA	U00096.3:280828-281983		0.280094	0.154477	0.0980579	0.138459	0.504495		-0.858525	0	1	1	no		-1.51421	0	1	1	no		-1.01645	0	1	1	no		0.848929	0	1	1	no
	yagE	U00096.3:282277-283186		6.67531	1.24802	0.118131	1.46687	3.37257		-2.4192	-2.71252	0.00115	0.00698724	yes		-5.82037	-1.94523	0.1953	0.358636	no		-2.1861	-2.53976	0.0008	0.005153	yes		-0.984988	-1.50448	0.01745	0.0603699	no
	yagF	U00096.3:283200-285168		6.12978	1.4562	0.949944	0.843064	1.68477		-2.07362	-3.22694	5e-05	0.000456756	yes		-2.68992	-3.46056	5e-05	0.000456756	yes		-2.86212	-3.81402	5e-05	0.000456756	yes		-1.86328	-2.96082	0.0001	0.000855768	yes
	yagG	U00096.3:285394-286777		0.391265	0.294962	0.564188	0.398666	0.720603		-0.407617	0	1	1	no		0.528028	0	1	1	no		0.0270331	0	1	1	no		0.881057	0	1	1	no
	yagH	U00096.3:286788-288399		1.08599	0.768592	0.78462	0.553403	0.402473		-0.498726	0	1	1	no		-0.46895	0	1	1	no		-0.972614	0	1	1	no		-1.43205	0	1	1	no
	yagI	U00096.3:288403-289162		9.96958	5.97154	3.58447	4.8099	6.95011		-0.739429	-1.16974	0.05	0.135663	no		-1.47577	-2.05671	0.0013	0.00769953	yes		-1.05152	-1.59061	0.01015	0.0396486	yes		-0.520495	-0.842365	0.1558	0.307382	no
	argF	U00096.3:289300-290305		5.04778	2.28766	3.22206	2.74201	2.60173		-1.14177	-1.63907	0.0156	0.0553297	no		-0.647665	-0.953398	0.12785	0.268232	no		-0.880414	-1.29724	0.05025	0.136134	no		-0.956179	-1.37153	0.0347	0.102816	no
	ykgS	U00096.3:290428-290633		62.6959	40.8964	32.1596	59.4702	33.3433		-0.616396	-0.765182	0.23225	0.401745	no		-0.963121	-1.15956	0.08905	0.207802	no		-0.0762043	-0.0974473	0.87225	0.92903	no		-0.910973	-1.06553	0.08675	0.203996	no
	yagJ	U00096.3:291403-292231		2.81	1.6178	3.66284	2.602	3.70594		-0.796537	-0.816833	0.1674	0.322875	no		0.382391	0.469432	0.4318	0.609737	no		-0.110951	-0.126827	0.8336	0.907136	no		0.39927	0.478753	0.4129	0.591743	no
	yagK	U00096.3:292321-292948		3.83249	2.56819	2.31159	3.79947	3.83878		-0.577526	-0.645938	0.2825	0.457997	no		-0.729395	-0.811778	0.2052	0.370201	no		-0.0124826	-0.0151233	0.9544	0.973411	no		0.00236661	0.00297399	0.9564	0.974301	no
	yagL	U00096.3:293219-293918		1.72491	1.15056	1.631	2.71456	3.4342		-0.584187	0	1	1	no		-0.080764	0	1	1	no		0.654193	0.63811	0.27965	0.454717	no		0.99345	0.988092	0.09345	0.215207	no
	yagM	U00096.3:293944-294799		0.452366	0.497339	1.28508	2.22434	0.818358		0.136738	0	1	1	no		1.5063	0	1	1	no		2.29782	0	1	1	no		0.855242	0	1	1	no
	yagN	U00096.3:295138-295579		53.9754	27.46	19.6273	24.741	27.0449		-0.974968	-1.8688	0.0016	0.00911016	yes		-1.45944	-2.67569	0.0001	0.000855768	yes		-1.1254	-2.12111	0.0007	0.00461134	yes		-0.996945	-1.83889	0.0018	0.0100316	yes
	intF	U00096.3:295695-297096		17.058	6.24222	8.0244	7.42785	8.51662		-1.45032	-2.84265	5e-05	0.000456756	yes		-1.08798	-2.12745	0.0006	0.00405268	yes		-1.19943	-2.41857	5e-05	0.000456756	yes		-1.00209	-2.02229	0.00035	0.00253827	yes
	ptwF	U00096.3:297205-297254		18632600	24274300	30884900	21642900	28468500		0.381604	0.934377	0.39735	0.577196	no		0.729076	1.31443	0.0879	0.205938	no		0.216068	0.327243	0.64115	0.77989	no		0.611539	0.979939	0.2002	0.364397	no
	paoD	U00096.3:297380-298726		0.541624	0.973442	0.555453	0.492762	1.19446		0.845803	0	1	1	no		0.0363719	0	1	1	no		-0.1364	0	1	1	no		1.141	0	1	1	no
	yagP	U00096.3:297380-298726		1.56524	0.365878	0.719861	1.15029	0.629138		-2.09695	0	1	1	no		-1.1206	0	1	1	no		-0.444384	0	1	1	no		-1.31494	0	1	1	no
	ykgT	U00096.3:297380-298726		31.1993	0	0	0	0		-inf	0	1	1	no		-inf	0	1	1	no		-inf	0	1	1	no		-inf	0	1	1	no
	paoA	U00096.3:298735-302573		0.139007	0.576002	0.12809	1.16051	1.22457		2.05092	0	1	1	no		-0.118001	0	1	1	no		3.06153	0	1	1	no		3.13904	0	1	1	no
	paoB	U00096.3:298735-302573		0.267109	0.0673035	0.119089	0.74796	0.482588		-1.98868	0	1	1	no		-1.16539	0	1	1	no		1.48553	0	1	1	no		0.853363	0	1	1	no
	paoC	U00096.3:298735-302573		0.541576	0.4943	0.266849	0.396124	0.596407		-0.131778	0	1	1	no		-1.02114	0	1	1	no		-0.451213	0	1	1	no		0.139132	0	1	1	no
	yagU	U00096.3:302990-303605		44.9155	18.6923	11.0002	9.62314	7.48732		-1.26477	-2.51948	5e-05	0.000456756	yes		-2.02969	-3.64544	5e-05	0.000456756	yes		-2.22263	-3.96861	5e-05	0.000456756	yes		-2.58469	-4.41709	5e-05	0.000456756	yes
	ykgJ	U00096.3:303852-304182		5.82294	3.22063	5.14657	3.50975	4.77989		-0.854406	-0.641991	0.2855	0.461192	no		-0.178138	-0.150555	0.7947	0.88381	no		-0.730381	-0.674967	0.38705	0.567364	no		-0.284772	-0.244689	0.6988	0.82114	no
	ecpC	U00096.3:304494-309332		0.66068	1.25942	1.3811	2.5009	1.57283		0.930738	0	1	1	no		1.06379	0	1	1	no		1.92042	2.0916	0.01285	0.0477079	yes		1.25134	0	1	1	no
	ecpD	U00096.3:304494-309332		0.351364	0.684659	1.85302	1.78444	1.85167		0.962419	0	1	1	no		2.39884	0	1	1	no		2.34443	0	1	1	no		2.39779	0	1	1	no
	ecpE	U00096.3:304494-309332		0.914371	0.840123	2.81173	2.2945	2.09729		-0.12218	0	1	1	no		1.62061	0.84986	0.2232	0.391242	no		1.32733	0.771896	0.2069	0.372173	no		1.19767	0	1	1	no
	ecpB	U00096.3:309357-310026		0.637145	0.375665	0.701487	0.304356	2.19135		-0.762176	0	1	1	no		0.138793	0	1	1	no		-1.06586	0	1	1	no		1.78213	1.18891	0.0899	0.209272	no
	ecpA	U00096.3:310083-310671		1.03491	3.06005	3.21762	1.38787	2.37622		1.56405	1.16597	0.0736	0.181289	no		1.63649	1.20249	0.0544	0.144665	no		0.423365	0	1	1	no		1.19916	0.852547	0.1456	0.293356	no
	ecpR	U00096.3:310745-311336		0.92149	0.0955248	0.439218	0.287567	0.356553		-3.27002	0	1	1	no		-1.06903	0	1	1	no		-1.68007	0	1	1	no		-1.36985	0	1	1	no
	ykgL	U00096.3:312111-312339		7.67387	14.9512	27.4941	9.52823	19.946		0.962234	0.839267	0.34805	0.527954	no		1.8411	1.92013	0.06725	0.169363	no		0.312255	0.412928	0.7823	0.875974	no		1.37807	1.38048	0.1512	0.301113	no
	ykgM	U00096.3:312373-312777		23.74	14.5994	14.9084	10.4227	6.512		-0.701415	-0.704777	0.2376	0.407917	no		-0.671198	-0.841509	0.43535	0.612771	no		-1.18759	-1.33724	0.1008	0.226998	no		-1.86615	-1.46107	0.0279	0.0869623	no
	ykgO	U00096.3:312373-312777		34.9072	37.384	0	13.003	24.3321		0.0988988	0.212021	0.9131	0.951265	no		-inf	nan	0.1504	0.29999	no		-1.42468	-1.99963	0.37285	0.553223	no		-0.520664	-0.314849	0.70925	0.82773	no
	ykgR	U00096.3:313140-313242		219.49	28.7403	19.9366	0	140.782		-2.93301	-5.65199	0.196	0.359402	no		-3.46067	-6.38081	0.2332	0.402866	no		-inf	nan	5e-05	0.000456756	yes		-0.640695	-0.770308	0.35995	0.540077	no
	ykgP	U00096.3:313715-313805		0	48.4575	0	37.8433	81.2425		inf	0	1	1	no		0	0	1	1	no		inf	0	1	1	no		inf	nan	0.04515	0.125472	no
	eaeH	U00096.3:314356-315228		0	0	0.372037	0	0.294967		0	0	1	1	no		inf	0	1	1	no		0	0	1	1	no		inf	0	1	1	no
	ykgA	U00096.3:316485-317169		2.21926	1.85665	4.53923	4.68622	3.58355		-0.257377	0	1	1	no		1.03237	1.24339	0.0619	0.159128	no		1.07835	1.36432	0.0387	0.111975	no		0.691313	0.835887	0.1884	0.34999	no
	ykgQ	U00096.3:317438-317567		0	0	0	0	13.5834		0	0	1	1	no		0	0	1	1	no		0	0	1	1	no		inf	0	1	1	no
	rclC	U00096.3:317725-318319		0.601523	0.901891	2.2973	2.55275	2.2148		0.584333	0	1	1	no		1.93325	0	1	1	no		2.08536	1.29557	0.0715	0.177411	no		1.88048	1.12602	0.0981	0.222685	no
	rclB	U00096.3:318330-318567		2.26029	0	21.6234	4.20513	18.5661		-inf	0	1	1	no		3.25802	2.91561	0.2145	0.381292	no		0.895643	0	1	1	no		3.03809	2.35149	0.21445	0.381241	no
	rclA	U00096.3:318675-320001		0.961881	1.68631	3.84679	5.6003	4.04208		0.809939	0	1	1	no		1.99972	2.64758	0.00265	0.0136611	yes		2.54157	3.5145	0.00045	0.00315248	yes		2.07117	2.8085	0.0017	0.00957428	yes
	rclR	U00096.3:320226-321081		2.59528	0.752878	0.431088	1.73213	1.77472		-1.7854	-1.58268	0.0381	0.110683	no		-2.58983	-1.84568	0.0488	0.133214	no		-0.583341	-0.652034	0.31285	0.491052	no		-0.548298	-0.623109	0.30315	0.480521	no
	ykgE	U00096.3:321607-322327		11.0947	2.00594	1.02781	2.25892	9.51998		-2.46752	-2.83255	0.00035	0.00253827	yes		-3.43223	-3.1235	0.002	0.0109348	yes		-2.29617	-2.95314	0.0011	0.00673872	yes		-0.220846	-0.399246	0.5188	0.685513	no
	ykgF	U00096.3:322337-324453		7.89182	3.15045	5.12082	7.52673	10.4713		-1.3248	-1.95331	0.00165	0.00934994	yes		-0.623983	-0.935948	0.12265	0.260789	no		-0.0683346	-0.111301	0.85045	0.916795	no		0.408012	0.68449	0.2589	0.431648	no
	ykgG	U00096.3:322337-324453		9.05529	4.3728	6.93516	10.7676	10.7242		-1.0502	-1.01467	0.10715	0.236917	no		-0.384832	-0.363917	0.52975	0.694067	no		0.24986	0.263747	0.6435	0.781607	no		0.244039	0.248152	0.67755	0.806528	no
	ykgH	U00096.3:324695-325364		1.6	0.902074	0.145269	0.361916	1.09069		-0.826755	0	1	1	no		-3.46128	0	1	1	no		-2.14435	0	1	1	no		-0.552832	0	1	1	no
	betA	U00096.3:325576-327247		9.82981	5.11375	3.72467	5.30318	8.10802		-0.942783	-1.86562	0.00295	0.0148699	yes		-1.40005	-2.63429	5e-05	0.000456756	yes		-0.890305	-1.7973	0.0045	0.0207782	yes		-0.277815	-0.599798	0.3472	0.52713	no
	betB	U00096.3:327260-328733		15.7949	8.83271	7.29298	7.29248	11.5741		-0.838534	-1.62686	0.00495	0.0224632	yes		-1.11488	-2.21177	0.00035	0.00253827	yes		-1.11498	-2.25285	0.00035	0.00253827	yes		-0.448556	-0.947394	0.1116	0.243865	no
	betI	U00096.3:328746-329334		30.0785	11.1482	9.67788	13.073	19.2495		-1.43192	-2.42626	5e-05	0.000456756	yes		-1.63597	-2.59436	0.0002	0.00156767	yes		-1.20214	-2.17982	0.00065	0.00432846	yes		-0.643909	-1.24163	0.0354	0.104403	no
	betT	U00096.3:329462-331496		8.51643	5.27507	6.25435	4.89046	6.7216		-0.691058	-1.38403	0.01825	0.0625654	no		-0.445388	-0.905322	0.11325	0.246421	no		-0.800279	-1.6252	0.00635	0.0274503	yes		-0.341444	-0.711185	0.2263	0.395092	no
	yahA	U00096.3:332370-333459		5.85368	10.0691	10.9637	17.4515	11.4042		0.782521	1.43147	0.01435	0.0518373	no		0.905314	1.654	0.00575	0.0253245	yes		1.57593	2.97857	5e-05	0.000456756	yes		0.962152	1.74542	0.0034	0.0166933	yes
	yahB	U00096.3:333500-334433		3.2037	2.22824	2.37074	2.91089	4.38155		-0.523831	-0.623801	0.28765	0.463123	no		-0.434401	-0.548169	0.3552	0.535208	no		-0.138275	-0.176961	0.74985	0.854819	no		0.451705	0.621662	0.284	0.459716	no
	yahC	U00096.3:334524-335022		0.107063	1.29753	3.03316	4.79534	3.82606		3.59924	0	1	1	no		4.82429	0.719108	0.08525	0.201312	no		5.4851	0.818059	0.08525	0.201312	no		5.15933	0.769582	0.08525	0.201312	no
	yahD	U00096.3:335279-335885		1.08759	0.812705	0.96391	1.23121	1.15111		-0.420327	0	1	1	no		-0.17416	0	1	1	no		0.17895	0	1	1	no		0.0818902	0	1	1	no
	yahE	U00096.3:335924-339743		0.390146	0	0.37619	0.119397	0.231968		-inf	0	1	1	no		-0.0525546	0	1	1	no		-1.70825	0	1	1	no		-0.750091	0	1	1	no
	yahF	U00096.3:335924-339743		0.113839	0.18271	1.35273	0.927078	1.66522		0.682563	0	1	1	no		3.57081	0	1	1	no		3.0257	0	1	1	no		3.87064	0	1	1	no
	yahG	U00096.3:335924-339743		0.271877	0.203907	0.197894	0.841655	0.909752		-0.415044	0	1	1	no		-0.458227	0	1	1	no		1.63027	0	1	1	no		1.74252	0	1	1	no
	yahI	U00096.3:340164-341115		0.297263	0.366391	0.961949	2.1683	3.14815		0.301648	0	1	1	no		1.69422	0	1	1	no		2.86675	1.54869	0.00675	0.0288128	yes		3.40469	1.87399	0.00335	0.0164994	yes
	yahJ	U00096.3:341124-342507		2.5156	2.00867	3.61895	4.84499	5.98959		-0.324664	0	1	1	no		0.524668	0.81608	0.193	0.355969	no		0.94559	1.56583	0.0219	0.0720544	no		1.25155	2.11933	0.00285	0.0144835	yes
	yahK	U00096.3:342883-343933		3.51971	5.43345	6.22318	4.41242	5.14113		0.626412	0.938847	0.116	0.250768	no		0.822195	1.20633	0.0472	0.129936	no		0.326113	0.470619	0.42245	0.601069	no		0.546627	0.79831	0.17445	0.332232	no
	yahL	U00096.3:344175-344991		0.442229	0.527386	0.991754	0.975902	0.0619553		0.254064	0	1	1	no		1.16519	0	1	1	no		1.14194	0	1	1	no		-2.8355	0	1	1	no
	yahM	U00096.3:345403-345649		21.2209	27.854	12.1839	24.2576	11.1588		0.392397	0.457375	0.4627	0.637062	no		-0.800509	-1.0232	0.22115	0.388939	no		0.192948	0.214713	0.72375	0.838015	no		-0.927301	-0.888432	0.1525	0.303012	no
	yahN	U00096.3:345665-346337		3.66225	0.0897935	0	0.436135	1.91585		-5.34998	-0.946999	0.10555	0.234497	no		-inf	nan	5e-05	0.000456756	yes		-3.06988	-1.66482	0.0456	0.126498	no		-0.934746	-0.888924	0.11095	0.242872	no
	yahO	U00096.3:346483-346759		20.386	39.1798	92.5239	114.248	109.413		0.94253	1.26997	0.04325	0.121611	no		2.18224	3.25834	0.00025	0.00190147	yes		2.48652	3.67428	5e-05	0.000456756	yes		2.42413	3.58052	0.0001	0.000855768	yes
	prpR	U00096.3:346856-348443		0.363013	0.1576	0.464851	0.302658	0.847715		-1.20375	0	1	1	no		0.356746	0	1	1	no		-0.262333	0	1	1	no		1.22356	0	1	1	no
	prpB	U00096.3:348681-349572		0.0928142	0.141297	0	0.400846	0.763914		0.606312	0	1	1	no		-inf	0	1	1	no		2.11063	0	1	1	no		3.04099	0	1	1	no
	prpC	U00096.3:350011-351181		0.0749281	0	0.187363	0.70969	0.46052		-inf	0	1	1	no		1.32226	0	1	1	no		3.24361	0	1	1	no		2.61969	0	1	1	no
	prpD	U00096.3:351214-352666		0.214992	0.239151	1.40078	2.01243	1.36718		0.153639	0	1	1	no		2.70388	0	1	1	no		3.22658	0	1	1	no		2.66885	0	1	1	no
	prpE	U00096.3:352705-354592		0.389661	0.594898	0.26664	1.48266	1.27625		0.610423	0	1	1	no		-0.547325	0	1	1	no		1.9279	0	1	1	no		1.71162	0	1	1	no
	codA	U00096.3:354921-357454		5.23549	5.25815	5.81989	5.17401	4.22136		0.00623037	0.00900876	0.98355	0.988219	no		0.152667	0.201842	0.73505	0.844972	no		-0.0170421	-0.0245866	0.96345	0.977817	no		-0.310618	-0.427385	0.4846	0.656005	no
	codB	U00096.3:354921-357454		2.67085	2.39254	3.77133	1.60974	2.8401		-0.158754	-0.13457	0.8157	0.896861	no		0.497774	0.436714	0.44125	0.618058	no		-0.730476	-0.641414	0.30955	0.487565	no		0.0886447	0.0790796	0.88985	0.938555	no
	cynR	U00096.3:357790-358690		3.30563	2.71941	4.83168	6.09299	6.21678		-0.281631	-0.356319	0.5348	0.698433	no		0.547598	0.760717	0.19275	0.355655	no		0.882223	1.2625	0.03345	0.0999397	no		0.911242	1.30876	0.0283	0.0878958	no
	cynT	U00096.3:358798-359458		0.14032	0.203198	0.751438	1.91901	1.05812		0.534167	0	1	1	no		2.42094	0	1	1	no		3.77357	0	1	1	no		2.91472	0	1	1	no
	cynS	U00096.3:359488-359959		2.83135	1.68837	8.83437	6.80244	9.22709		-0.745857	-0.556683	0.32325	0.502204	no		1.64164	1.54371	0.0094	0.0373563	yes		1.26456	1.16226	0.03605	0.105887	no		1.70439	1.60649	0.00755	0.0314623	yes
	cynX	U00096.3:359991-361146		0.505994	0.628561	3.00643	2.17145	2.33764		0.312934	0	1	1	no		2.57086	2.23645	0.00565	0.0249397	yes		2.10147	0	1	1	no		2.20786	1.90268	0.0097	0.0382606	yes
	lacA	U00096.3:361248-361860		0.729947	0.329484	3.53578	8.01806	5.84956		-1.14758	0	1	1	no		2.27617	1.60088	0.02265	0.0739428	no		3.45739	2.55326	0.0042	0.0197329	yes		3.00246	2.17457	0.00675	0.0288128	yes
	lacY	U00096.3:361925-363179		0.280985	0.116359	1.97374	2.2045	1.65167		-1.2719	0	1	1	no		2.81237	0	1	1	no		2.97189	0	1	1	no		2.55536	0	1	1	no
	lacZ	U00096.3:363230-366305		2.46578	2.09759	5.51866	5.38108	4.45343		-0.233315	0	1	1	no		1.16227	2.15429	0.0007	0.00461134	yes		1.12585	2.24063	0.0013	0.00769953	yes		0.852871	1.67499	0.00925	0.0368508	yes
	lacI	U00096.3:366427-367510		199.915	230.314	211.841	206.223	195.04		0.204212	0.429917	0.45535	0.630359	no		0.0835918	0.175895	0.7553	0.858756	no		0.0448142	0.0947876	0.86565	0.92553	no		-0.0356213	-0.0756019	0.8912	0.939422	no
	mhpR	U00096.3:367586-368420		6.95612	2.90412	4.24991	10.2068	28.9573		-1.26018	-1.7516	0.00785	0.0324287	yes		-0.710849	-1.03686	0.07505	0.183944	no		0.553177	0.953835	0.11295	0.245969	no		2.05757	3.80318	5e-05	0.000456756	yes
	mhpA	U00096.3:368610-370275		0.182438	0.238137	0.327534	0.861423	0.517464		0.384388	0	1	1	no		0.844241	0	1	1	no		2.23932	0	1	1	no		1.50405	0	1	1	no
	mhpB	U00096.3:370276-371221		0.0844015	0.421238	1.46292	0.512208	0.792439		2.31929	0	1	1	no		4.11544	0	1	1	no		2.60139	0	1	1	no		3.23096	0	1	1	no
	mhpC	U00096.3:371238-372105		0.0479286	0.361412	0.997573	0.772511	0.904259		2.91469	0	1	1	no		4.37947	0	1	1	no		4.0106	0	1	1	no		4.23778	0	1	1	no
	mhpD	U00096.3:372114-374881		0.452808	0.304973	0.837294	2.03584	2.26355		-0.570216	0	1	1	no		0.886835	0	1	1	no		2.16865	0	1	1	no		2.32161	1.27195	0.07685	0.187066	no
	mhpE	U00096.3:372114-374881		0.226123	1.1315	2.88046	2.99011	2.67666		2.32306	0	1	1	no		3.67112	1.50121	0.0873	0.204928	no		3.72502	1.59705	0.087	0.204395	no		3.56525	1.51214	0.0871	0.204585	no
	mhpF	U00096.3:372114-374881		0.47744	1.15892	5.13585	3.67322	4.08882		1.27939	0	1	1	no		3.42721	2.15444	0.039	0.112623	no		2.94365	1.82763	0.05025	0.136134	no		3.09829	1.92079	0.04555	0.126386	no
	mhpT	U00096.3:375458-376670		0.352605	0.54395	2.39421	3.76763	2.2897		0.625421	0	1	1	no		2.76342	2.01898	0.0132	0.0486517	yes		3.41753	2.55231	0.00565	0.0249397	yes		2.69903	1.9753	0.01365	0.0498692	yes
	yaiL	U00096.3:376771-377311		34.1252	23.5099	33.24	19.6448	25.1684		-0.537571	-1.04312	0.07955	0.19187	no		-0.0379168	-0.0714618	0.89835	0.94349	no		-0.796693	-1.52286	0.0128	0.0475719	yes		-0.439224	-0.817386	0.15955	0.312515	no
	frmB	U00096.3:377534-378368		12.1636	12.6204	12.3944	14.5882	10.6752		0.053184	0.105161	0.86485	0.92499	no		0.0271139	0.0512168	0.92655	0.958277	no		0.262229	0.523842	0.39005	0.57021	no		-0.188308	-0.355456	0.55195	0.711961	no
	frmA	U00096.3:378461-379571		39.1905	33.897	35.5042	27.3641	25.1823		-0.209348	-0.454491	0.43095	0.608859	no		-0.142514	-0.307389	0.589	0.740659	no		-0.518223	-1.10173	0.0595	0.154447	no		-0.638094	-1.36821	0.02005	0.0673256	no
	frmR	U00096.3:379605-379881		39.9745	30.5298	14.7453	32.9734	31.3724		-0.38886	-0.523116	0.3619	0.541723	no		-1.43882	-1.62386	0.0107	0.0413189	yes		-0.277775	-0.37347	0.5067	0.674959	no		-0.349585	-0.467851	0.414	0.592683	no
	yaiO	U00096.3:380068-380842		1.21847	0.954226	10.839	11.0565	8.77222		-0.352671	0	1	1	no		3.15309	3.44195	0.00045	0.00315248	yes		3.18175	3.46858	0.00025	0.00190147	yes		2.84787	3.08747	0.00075	0.004887	yes
	yaiP	U00096.3:380843-383935		0.354899	0.360245	1.16979	1.77348	1.69191		0.0215724	0	1	1	no		1.72076	0	1	1	no		2.3211	0	1	1	no		2.25317	0	1	1	no
	yaiX	U00096.3:380843-383935		7.53575	5.1085	5.22108	6.36948	6.26692		-0.560852	-0.729776	0.23065	0.400028	no		-0.529403	-0.645585	0.27055	0.444131	no		-0.242576	-0.277885	0.62525	0.768293	no		-0.265996	-0.316198	0.584	0.737082	no
	yaiS	U00096.3:384058-384616		0.580246	0.106243	1.04133	0.863433	0.288315		-2.4493	0	1	1	no		0.843696	0	1	1	no		0.573419	0	1	1	no		-1.00902	0	1	1	no
	tauA	U00096.3:385231-386194		0.266495	0	0.553258	0.464402	0.962028		-inf	0	1	1	no		1.05384	0	1	1	no		0.801267	0	1	1	no		1.85197	0	1	1	no
	tauB	U00096.3:386206-388646		0.378223	0.128613	1.52587	0.849302	0.758003		-1.5562	0	1	1	no		2.01232	0	1	1	no		1.16704	0	1	1	no		1.00296	0	1	1	no
	tauC	U00096.3:386206-388646		0.177763	0.554997	0.83783	1.36564	0.664579		1.64252	0	1	1	no		2.2367	0	1	1	no		2.94155	0	1	1	no		1.90248	0	1	1	no
	tauD	U00096.3:386206-388646		0.379554	0.448664	1.84787	1.72371	2.08898		0.241333	0	1	1	no		2.28349	0	1	1	no		2.18314	0	1	1	no		2.46042	0	1	1	no
	hemB	U00096.3:388752-389727		25.0655	29.3388	18.8969	17.7283	12.1854		0.227106	0.532164	0.3983	0.578135	no		-0.407556	-0.890076	0.1404	0.28657	no		-0.499652	-1.10446	0.07475	0.183394	no		-1.04055	-2.23047	0.0003	0.00222065	yes
	yaiT	U00096.3:390250-394418		2.65179	1.85841	2.14499	2.52651	3.42653		-0.512895	-0.694372	0.24905	0.42123	no		-0.305994	-0.421749	0.47765	0.650094	no		-0.0698197	-0.0921493	0.87775	0.932189	no		0.369783	0.517909	0.3941	0.574242	no
	yaiV	U00096.3:394505-395129		1.28705	0	0.653473	0.287219	0.126585		-inf	0	1	1	no		-0.977865	0	1	1	no		-2.16384	0	1	1	no		-3.34589	0	1	1	no
	ampH	U00096.3:395129-396287		8.24089	7.1825	11.4887	9.31832	13.4884		-0.198313	-0.359021	0.5326	0.696672	no		0.479344	0.900136	0.1104	0.241966	no		0.177271	0.330058	0.5667	0.723533	no		0.710846	1.36427	0.0173	0.0599715	no
	sbmA	U00096.3:396638-397859		3.65885	92.9391	774.452	663.428	400.95		4.66683	8.79628	5e-05	0.000456756	yes		7.72564	13.6416	5e-05	0.000456756	yes		7.50241	13.4363	5e-05	0.000456756	yes		6.77589	12.2018	5e-05	0.000456756	yes
	yaiW	U00096.3:397871-398966		3.83247	42.5554	362.223	358.556	231.453		3.47299	6.1487	5e-05	0.000456756	yes		6.56246	11.2408	5e-05	0.000456756	yes		6.54778	11.1401	5e-05	0.000456756	yes		5.9163	10.1635	5e-05	0.000456756	yes
	yaiY	U00096.3:399024-399333		0.624911	1.24378	0	4.20594	4.15052		0.993004	0	1	1	no		-inf	0	1	1	no		2.7507	1.20226	0.1526	0.303098	no		2.73157	1.14572	0.15015	0.299648	no
	yaiZ	U00096.3:399592-399805		228.842	107.009	432.786	497.15	472.832		-1.09662	-1.96656	0.00285	0.0144835	yes		0.919302	1.80404	0.00295	0.0148699	yes		1.11933	2.22395	0.00015	0.00122022	yes		1.04698	2.02557	0.00065	0.00432846	yes
	ddlA	U00096.3:399828-400923		36.7852	42.1668	34.6586	16.4574	15.0124		0.196982	0.44827	0.45215	0.627558	no		-0.0859122	-0.191825	0.74525	0.85229	no		-1.16039	-2.69964	0.00015	0.00122022	yes		-1.29297	-2.78141	5e-05	0.000456756	yes
	iraP	U00096.3:401385-401646		37.4782	22.2312	19.4252	60.0186	75.2217		-0.753465	-0.899225	0.1338	0.276903	no		-0.948122	-1.06341	0.0681	0.170907	no		0.679355	0.966846	0.09595	0.219392	no		1.0051	1.47935	0.015	0.05368	no
	phoA	U00096.3:401746-403162		3.08063	3.40513	5.1932	5.67068	8.40169		0.144485	0.225202	0.70865	0.827446	no		0.753399	1.23719	0.0477	0.130928	no		0.880296	1.48495	0.02035	0.0681356	no		1.44745	2.493	0.00055	0.00375442	yes
	psiF	U00096.3:403280-403601		0.284421	3.69806	0	1.5346	2.38709		3.70067	0.832589	0.08755	0.205334	no		-inf	0	1	1	no		2.43177	0	1	1	no		3.06915	0	1	1	no
	yaiC	U00096.3:403702-404818		0.369954	1.24915	5.16277	4.86271	2.36889		1.75552	0	1	1	no		3.80273	2.99236	0.01315	0.0485177	yes		3.71634	2.93867	0.01315	0.0485177	yes		2.67879	2.04317	0.0257	0.0814908	no
	proC	U00096.3:404834-405644		25.867	14.9649	10.6446	6.56175	9.73883		-0.789526	-1.57359	0.00785	0.0324287	yes		-1.28099	-2.36268	0.00035	0.00253827	yes		-1.97896	-3.46349	5e-05	0.000456756	yes		-1.40929	-2.67875	5e-05	0.000456756	yes
	yaiI	U00096.3:405763-406222		5.03387	9.88313	10.1181	5.88102	5.26788		0.973301	1.13128	0.0638	0.162976	no		1.00721	1.14964	0.05265	0.141052	no		0.224398	0.23789	0.68345	0.810512	no		0.0655565	0.0679391	0.9219	0.955859	no
	aroL	U00096.3:406404-406929		14.7076	17.9777	18.542	14.5743	12.5096		0.289644	0.467341	0.41405	0.592706	no		0.334236	0.551972	0.3368	0.5161	no		-0.013135	-0.021018	0.97665	0.984513	no		-0.23353	-0.360076	0.5245	0.689815	no
	yaiA	U00096.3:406978-407170		66.0826	128.248	82.7225	90.8178	86.5699		0.956599	1.26888	0.0377	0.109736	no		0.324008	0.40278	0.4893	0.660139	no		0.458704	0.556211	0.3417	0.521332	no		0.389594	0.483898	0.4092	0.588544	no
	aroM	U00096.3:407427-408105		7.81323	6.80917	4.61681	9.81146	6.15983		-0.198441	-0.331582	0.58905	0.740687	no		-0.759024	-1.06879	0.06605	0.167178	no		0.328548	0.565838	0.36125	0.541175	no		-0.343029	-0.521683	0.37305	0.553443	no
	yaiE	U00096.3:408176-408461		135.516	77.775	62.4602	70.166	55.509		-0.801086	-1.47224	0.01355	0.0496229	yes		-1.11746	-1.99648	0.00135	0.00793837	yes		-0.949622	-1.69551	0.008	0.032898	yes		-1.28767	-2.31533	0.00035	0.00253827	yes
	ykiA	U00096.3:408608-408950		3.87913	3.41742	3.16056	8.80447	8.8571		-0.182826	-0.129559	0.8251	0.90212	no		-0.295554	-0.232177	0.71615	0.832558	no		1.1825	1.02622	0.09205	0.212902	no		1.1911	1.02489	0.0926	0.213794	no
	rdgC	U00096.3:409107-410019		30.7175	37.2849	26.6558	19.2991	15.7987		0.279532	0.586445	0.30745	0.485074	no		-0.204613	-0.418854	0.47075	0.643924	no		-0.670523	-1.33193	0.0195	0.0659395	no		-0.959256	-1.89186	0.0011	0.00673872	yes
	mak	U00096.3:410143-411052		16.0106	8.36786	7.25414	7.94018	8.34874		-0.936096	-1.73099	0.00435	0.0202398	yes		-1.14215	-1.96479	0.0014	0.00818277	yes		-1.01178	-1.84994	0.0032	0.0158839	yes		-0.939396	-1.69335	0.0061	0.0265763	yes
	araJ	U00096.3:411296-412481		2.6212	2.11413	2.04446	3.95348	2.8733		-0.310162	-0.417016	0.4705	0.643747	no		-0.35851	-0.457763	0.42595	0.604292	no		0.592896	0.861254	0.14185	0.288294	no		0.132482	0.187402	0.7569	0.859806	no
	sbcC	U00096.3:412606-416952		2.50802	3.40841	4.81335	3.62082	4.33152		0.442552	0.677491	0.26405	0.43693	no		0.940496	1.45771	0.01755	0.0606608	no		0.529771	0.816114	0.182	0.341995	no		0.788325	1.24535	0.0392	0.113029	no
	sbcD	U00096.3:412606-416952		6.50731	5.9753	5.2325	4.94346	5.13533		-0.123051	-0.174298	0.77465	0.870845	no		-0.314561	-0.360127	0.53615	0.699395	no		-0.39654	-0.449381	0.4256	0.60394	no		-0.341606	-0.432465	0.46065	0.635075	no
	phoB	U00096.3:417141-417831		12.6595	61.9155	230.418	300.108	233.117		2.29008	4.4281	5e-05	0.000456756	yes		4.18595	8.05965	5e-05	0.000456756	yes		4.56718	8.76794	5e-05	0.000456756	yes		4.20276	8.1084	5e-05	0.000456756	yes
	phoR	U00096.3:417888-419184		4.35019	19.7379	82.4812	88.4888	66.6327		2.18182	4.23364	5e-05	0.000456756	yes		4.24492	8.16	5e-05	0.000456756	yes		4.34635	8.30542	5e-05	0.000456756	yes		3.93708	7.60125	5e-05	0.000456756	yes
	brnQ	U00096.3:419590-420910		9.14559	11.4255	21.3005	25.6969	19.2931		0.321109	0.687719	0.2651	0.438259	no		1.21974	2.61017	5e-05	0.000456756	yes		1.49045	3.21651	5e-05	0.000456756	yes		1.07694	2.33628	0.0001	0.000855768	yes
	proY	U00096.3:420985-422359		7.67257	15.0477	13.2104	23.5399	11.2456		0.971757	1.89268	0.0013	0.00769953	yes		0.783892	1.48899	0.01075	0.041461	yes		1.61732	3.16331	5e-05	0.000456756	yes		0.551579	1.06192	0.0626	0.160525	no
	malZ	U00096.3:422517-424332		2.28295	2.19331	1.53214	2.7112	2.47324		-0.0577927	-0.088878	0.8771	0.931795	no		-0.575353	0	1	1	no		0.248032	0.396052	0.50155	0.670695	no		0.1155	0.181361	0.76275	0.863326	no
	acpH	U00096.3:424336-424918		5.21477	4.3665	5.06027	6.27496	5.80424		-0.256129	-0.319325	0.593	0.743498	no		-0.0433919	-0.0524724	0.9358	0.962989	no		0.267	0.348205	0.5524	0.712369	no		0.154503	0.202681	0.73245	0.84362	no
	queA	U00096.3:425010-426081		9.96458	14.1585	8.66325	11.5624	9.23447		0.506788	0.993272	0.0868	0.204078	no		-0.201902	-0.375701	0.521	0.687177	no		0.214554	0.408309	0.47355	0.646411	no		-0.109781	-0.206899	0.72525	0.839059	no
	tgt	U00096.3:426136-427264		69.0494	96.2946	68.9625	61.0132	44.0252		0.479826	1.07381	0.07555	0.184736	no		-0.00181595	-0.00399846	0.99335	0.994375	no		-0.178508	-0.398082	0.49325	0.663588	no		-0.649298	-1.44915	0.0149	0.0534189	no
	yajC	U00096.3:427286-427619		204.181	325.857	342.696	174.649	191.473		0.67439	1.44356	0.01335	0.0490555	yes		0.747081	1.52994	0.0077	0.0319501	yes		-0.225388	-0.479576	0.39735	0.577196	no		-0.0927047	-0.188483	0.7356	0.845368	no
	secD	U00096.3:427646-429494		82.1441	119.01	64.0813	59.9866	54.7216		0.534854	1.14079	0.05215	0.139994	no		-0.358255	-0.765613	0.1869	0.348015	no		-0.453518	-0.975176	0.10085	0.227063	no		-0.586047	-1.27067	0.03335	0.0997359	no
	secF	U00096.3:429504-430476		79.0096	136.126	107.993	112.259	87.4707		0.784838	2.08356	0.00345	0.0168797	yes		0.450843	1.09787	0.09085	0.211014	no		0.506738	1.26435	0.0587	0.152899	no		0.146773	0.379483	0.58	0.733822	no
	yajD	U00096.3:430604-430952		47.5413	41.1312	17.4725	23.7829	33.497		-0.208948	-0.405287	0.5104	0.678042	no		-1.44409	-2.26415	0.00075	0.004887	yes		-0.999256	-1.70777	0.0085	0.0345335	yes		-0.505149	-0.916411	0.12385	0.262545	no
	tsx	U00096.3:431128-432013		965.909	271.227	18.9823	26.1308	50.4513		-1.83239	-3.54083	5e-05	0.000456756	yes		-5.66916	-10.4606	5e-05	0.000456756	yes		-5.20807	-10.305	5e-05	0.000456756	yes		-4.25892	-8.59203	5e-05	0.000456756	yes
	yajI	U00096.3:432311-432851		5.26862	2.15787	1.10652	2.07525	0.92307		-1.28782	-1.16619	0.0622	0.159761	no		-2.25139	-1.72317	0.0359	0.105539	no		-1.34414	-1.16719	0.05215	0.139994	no		-2.51291	-1.75263	0.03035	0.0927719	no
	nrdR	U00096.3:433001-433451		59.6214	42.2584	33.5575	32.5214	25.2039		-0.496593	-1.08037	0.0891	0.207891	no		-0.829197	-1.71282	0.00845	0.0343722	yes		-0.874441	-1.82653	0.0053	0.0236947	yes		-1.24219	-2.47625	0.00035	0.00253827	yes
	ribD	U00096.3:433454-434558		18.8089	21.6592	20.1908	23.0436	19.2012		0.20357	0.440357	0.4579	0.632773	no		0.102282	0.216939	0.7085	0.827416	no		0.292953	0.642949	0.28705	0.462698	no		0.0297803	0.063633	0.91525	0.952407	no
	ribE	U00096.3:434646-435117		70.972	122.178	122.828	130.403	107.571		0.783661	1.74396	0.0036	0.0174869	yes		0.791313	1.70953	0.004	0.0189974	yes		0.877653	1.94676	0.0016	0.00911016	yes		0.599968	1.31403	0.0252	0.0802105	no
	nusB	U00096.3:435136-435556		88.3943	203.078	191.828	176.228	176.36		1.20001	3.03641	5e-05	0.000456756	yes		1.11779	2.6261	5e-05	0.000456756	yes		0.995421	2.41134	0.0003	0.00222065	yes		0.996499	2.50056	0.0003	0.00222065	yes
	pgpA	U00096.3:435633-437107		26.7045	23.4536	22.3687	26.332	21.1953		-0.187273	-0.255914	0.67505	0.804917	no		-0.255603	-0.328043	0.5827	0.735877	no		-0.0202644	-0.0275998	0.9632	0.977754	no		-0.333342	-0.444848	0.4409	0.617779	no
	thiL	U00096.3:435633-437107		10.5989	18.0866	11.1708	17.0882	17.6653		0.770998	1.19606	0.0455	0.12628	no		0.07581	0.101384	0.85585	0.919939	no		0.689083	1.03297	0.0753	0.184387	no		0.737002	1.1435	0.05135	0.138397	no
	yajO	U00096.3:437160-438135		7.77	8.05132	11.7657	9.31489	10.0573		0.0513101	0.112822	0.87275	0.9293	no		0.598598	1.25177	0.0592	0.153833	no		0.261625	0.538389	0.41355	0.592245	no		0.372257	0.805217	0.2336	0.403283	no
	dxs	U00096.3:438314-440177		21.0529	21.5859	14.6206	13.0759	16.0345		0.036066	0.0866249	0.8921	0.940054	no		-0.526023	-1.19314	0.0477	0.130928	no		-0.687113	-1.57695	0.01055	0.0408639	yes		-0.392844	-0.920262	0.13275	0.275371	no
	ispA	U00096.3:440201-441343		45.036	31.7751	23.5915	23.6825	24.6199		-0.503182	-1.06059	0.07255	0.179308	no		-0.93281	-1.8442	0.0014	0.00818277	yes		-0.927256	-1.95054	0.00135	0.00793837	yes		-0.871258	-1.75447	0.00425	0.0198908	yes
	xseB	U00096.3:440201-441343		99.8187	40.2338	42.2352	36.782	70.3654		-1.3109	-0.744978	0.19755	0.361127	no		-1.24087	-0.810144	0.19595	0.359372	no		-1.44031	-0.954441	0.12895	0.270051	no		-0.504443	-0.356392	0.54605	0.707344	no
	thiI	U00096.3:441548-442997		21.5364	44.0218	33.5919	27.3071	26.6492		1.03144	2.35301	0.00015	0.00122022	yes		0.641333	1.42056	0.01655	0.0578984	no		0.342498	0.788452	0.19345	0.35654	no		0.307316	0.675896	0.2544	0.426586	no
	panE	U00096.3:443050-444515		25.3768	17.9412	15.0477	12.3157	8.35432		-0.500232	-1.00631	0.11785	0.253503	no		-0.753968	-1.52966	0.0228	0.0743051	no		-1.04301	-2.01917	0.00215	0.0115793	yes		-1.60291	-2.97334	5e-05	0.000456756	yes
	yajL	U00096.3:443050-444515		15.3658	15.8796	8.59439	5.74373	6.36687		0.0474502	0.0489922	0.93045	0.960374	no		-0.838254	-0.772185	0.19355	0.356589	no		-1.41966	-1.18977	0.08685	0.204159	no		-1.27106	-1.13667	0.06725	0.169363	no
	yajQ	U00096.3:444682-445174		188.919	169.36	119.489	76.6751	58.5588		-0.157668	-0.321969	0.55585	0.715055	no		-0.660885	-1.3866	0.01255	0.0468288	yes		-1.30093	-2.69633	5e-05	0.000456756	yes		-1.68981	-3.4685	5e-05	0.000456756	yes
	yajR	U00096.3:445301-446666		5.65116	7.01587	5.12345	5.6105	5.40053		0.312075	0.583203	0.31915	0.497878	no		-0.14143	-0.245187	0.6686	0.800411	no		-0.0104169	-0.0187152	0.98185	0.987329	no		-0.0654457	-0.117892	0.83785	0.909424	no
	cyoE	U00096.3:446814-447705		282.952	313.744	168.045	147.926	134.601		0.149032	0.30787	0.58605	0.738533	no		-0.751707	-1.70048	0.00705	0.0298213	yes		-0.935677	-2.06954	0.00105	0.00647555	yes		-1.07187	-2.26217	0.00015	0.00122022	yes
	cyoB	U00096.3:447716-450641		201.565	201.917	152.334	125.709	92.5852		0.00251935	0.00378705	0.9948	0.995416	no		-0.404011	-0.604739	0.29745	0.474178	no		-0.681158	-1.05839	0.0706	0.175775	no		-1.12239	-1.75162	0.0029	0.0146775	yes
	cyoC	U00096.3:447716-450641		242.674	246.178	229.898	158.785	127.24		0.0206819	0.0166173	0.9761	0.984232	no		-0.0780288	-0.0641552	0.9081	0.948761	no		-0.611945	-0.503294	0.38865	0.568865	no		-0.931466	-0.784158	0.1713	0.328072	no
	cyoD	U00096.3:447716-450641		933.2	985.364	642.97	471.063	337.671		0.0784697	0.0654057	0.9107	0.950138	no		-0.537435	-0.45978	0.45045	0.626062	no		-0.986266	-0.835027	0.16675	0.321924	no		-1.46657	-1.25647	0.0431	0.121336	no
	cyoA	U00096.3:450662-451610		363.373	344.268	271.808	205.684	156.143		-0.0779182	-0.154375	0.7803	0.874579	no		-0.41886	-0.819726	0.1487	0.297612	no		-0.821019	-1.62872	0.00505	0.0228065	yes		-1.21858	-2.43292	5e-05	0.000456756	yes
	ampG	U00096.3:452069-453545		12.9845	13.1742	7.06079	10.5313	10.5832		0.0209204	0.0466986	0.9369	0.963638	no		-0.878891	-1.7598	0.0032	0.0158839	yes		-0.302108	-0.648552	0.28495	0.460722	no		-0.295014	-0.63829	0.29415	0.470435	no
	yajG	U00096.3:453588-454167		124.83	109.053	86.6895	82.3291	80.0553		-0.194932	-0.433086	0.44375	0.620306	no		-0.52603	-1.11212	0.054	0.143802	no		-0.600484	-1.34004	0.02385	0.0768816	no		-0.64089	-1.40533	0.01745	0.0603699	no
	bolA	U00096.3:454471-454789		140.398	101.905	61.2571	73.0593	73.3537		-0.462298	-0.918065	0.1167	0.251801	no		-1.19657	-2.17778	0.00025	0.00190147	yes		-0.942378	-1.85322	0.00205	0.011151	yes		-0.936575	-1.80227	0.0022	0.0117926	yes
	tig	U00096.3:455132-456431		153.157	199.5	173.438	155.015	125.109		0.381378	0.763192	0.19335	0.356442	no		0.179409	0.354476	0.5268	0.691817	no		0.0174012	0.0340708	0.9533	0.972703	no		-0.29183	-0.577751	0.31755	0.496166	no
	clpP	U00096.3:456676-457300		314.102	420.879	1063.08	1630.07	1533.43		0.422171	0.923493	0.1298	0.271266	no		1.75895	3.69399	5e-05	0.000456756	yes		2.37563	5.00911	5e-05	0.000456756	yes		2.28745	4.65445	5e-05	0.000456756	yes
	clpX	U00096.3:457425-458700		158.848	385.131	1657.02	2004.5	1756.04		1.2777	2.74821	0.0001	0.000855768	yes		3.38287	6.55438	5e-05	0.000456756	yes		3.65752	7.00293	5e-05	0.000456756	yes		3.46661	6.57946	5e-05	0.000456756	yes
	lon	U00096.3:458887-461242		169.796	193.537	399.83	667.147	544.994		0.188801	0.380214	0.52635	0.69143	no		1.23558	2.52912	5e-05	0.000456756	yes		1.9742	3.86617	5e-05	0.000456756	yes		1.68243	3.38878	5e-05	0.000456756	yes
	hupB	U00096.3:461450-461723		1387.47	1623.72	691.177	831.366	757.5		0.226842	0.517014	0.40755	0.587073	no		-1.00533	-2.38674	0.00035	0.00253827	yes		-0.738903	-1.90722	0.00625	0.0271015	yes		-0.87314	-2.01678	0.00155	0.00889096	yes
	ppiD	U00096.3:461914-463786		43.7084	49.7034	54.8636	49.2545	39.6108		0.185433	0.418693	0.4896	0.660377	no		0.32794	0.725065	0.21785	0.385014	no		0.172345	0.388144	0.52075	0.687068	no		-0.142018	-0.315503	0.5928	0.743387	no
	ybaV	U00096.3:463936-464308		15.9938	39.0193	54.5069	32.6395	16.9838		1.28668	1.93874	0.00245	0.0128398	yes		1.76893	2.75102	0.00015	0.00122022	yes		1.02911	1.52605	0.01225	0.0459052	yes		0.0866517	0.116761	0.83765	0.909372	no
	fadM	U00096.3:464401-464800		6.27353	2.562	24.0482	13.0322	13.8369		-1.29201	-0.981485	0.0916	0.212285	no		1.93858	2.2904	0.0019	0.0104967	yes		1.05473	1.1878	0.05065	0.136988	no		1.14117	1.27845	0.03755	0.109419	no
	queC	U00096.3:464851-465547		22.6759	22.5108	17.3284	13.8034	14.5239		-0.0105444	-0.0218188	0.9655	0.978916	no		-0.388027	-0.757149	0.19075	0.35315	no		-0.716134	-1.36391	0.023	0.0747742	no		-0.642733	-1.21944	0.0385	0.11156	no
	ybaE	U00096.3:465611-467312		2.03495	0.717943	0.721371	0.927429	1.58223		-1.50305	0	1	1	no		-1.49618	0	1	1	no		-1.13369	0	1	1	no		-0.363036	0	1	1	no
	cof	U00096.3:467411-468230		13.1569	16.0112	18.0309	22.6371	23.9859		0.283267	0.63945	0.33855	0.517948	no		0.454653	0.960679	0.1336	0.276596	no		0.782868	1.71899	0.00925	0.0368508	yes		0.866367	1.91498	0.0036	0.0174869	yes
	ybaO	U00096.3:468382-468841		15.3681	9.2516	7.40889	9.06479	6.79117		-0.732164	-1.08063	0.0725	0.17925	no		-1.05261	-1.52847	0.0156	0.0553297	no		-0.761593	-1.11829	0.0578	0.151167	no		-1.17821	-1.62882	0.0134	0.0491917	yes
	mdlA	U00096.3:468870-472417		6.22459	7.51755	7.49651	5.75492	5.46186		0.272284	0.439689	0.44885	0.62475	no		0.26824	0.447033	0.4409	0.617779	no		-0.113183	-0.178118	0.75605	0.859261	no		-0.188586	-0.305122	0.5934	0.743754	no
	mdlB	U00096.3:468870-472417		2.17368	4.90571	2.33279	3.47099	2.804		1.17432	1.25978	0.0396	0.113893	no		0.101915	0.0906951	0.8737	0.929739	no		0.675207	0.700316	0.25005	0.422105	no		0.367345	0.3787	0.51185	0.679393	no
	glnK	U00096.3:472597-472936		0.242177	0	0	2.58988	2.22497		-inf	0	1	1	no		-inf	0	1	1	no		3.41875	0.782234	0.1336	0.276596	no		3.19965	0	1	1	no
	amtB	U00096.3:472965-474252		1.92772	2.37034	2.11148	2.00213	1.80825		0.298201	0.428093	0.4823	0.654037	no		0.131356	0	1	1	no		0.0546404	0	1	1	no		-0.0923005	0	1	1	no
	tesB	U00096.3:474300-475161		14.4348	9.626	7.93739	8.1696	6.58725		-0.584542	-1.13792	0.06415	0.163619	no		-0.862813	-1.56787	0.01035	0.0402647	yes		-0.821212	-1.54855	0.01235	0.0462312	yes		-1.1318	-2.09945	0.0012	0.00723499	yes
	ybaY	U00096.3:475378-475951		8.18154	8.96333	5.88937	5.99255	2.96892		0.131662	0.192925	0.7443	0.851605	no		-0.474259	-0.619503	0.27825	0.453048	no		-0.449202	-0.604766	0.30225	0.479593	no		-1.46243	-1.6184	0.0127	0.0472628	yes
	ybaZ	U00096.3:475981-476371		7.23496	3.9958	3.78813	3.89989	4.54589		-0.856503	-0.753043	0.19635	0.359772	no		-0.9335	-0.981268	0.17885	0.338029	no		-0.891552	-0.821611	0.1849	0.345449	no		-0.670422	-0.621899	0.2934	0.469715	no
	ffs	U00096.3:476447-476561		188000	288560	277611	309507	248823		0.618143	1.00795	0.0821	0.196184	no		0.562334	1.01386	0.0754	0.184513	no		0.719243	1.30176	0.0283	0.0878958	no		0.404387	0.729813	0.19615	0.359553	no
	ybaA	U00096.3:476671-477025		0.998073	3.41205	9.20096	10.3366	5.40053		1.77342	1.16958	0.2575	0.429946	no		3.20457	2.13936	0.21425	0.380975	no		3.37248	2.26391	0.21425	0.380975	no		2.43588	1.55566	0.21555	0.382496	no
	ylaB	U00096.3:477066-478617		2.87893	4.33194	7.19988	7.70735	6.22797		0.58948	0.975137	0.0916	0.212285	no		1.32244	2.34129	0.0003	0.00222065	yes		1.4207	2.63101	0.0002	0.00156767	yes		1.11323	1.85568	0.0015	0.0086619	yes
	ylaC	U00096.3:478780-479251		18.6928	25.8849	37.1562	23.3735	23.4774		0.469631	0.924253	0.1724	0.329623	no		0.991121	1.89251	0.00195	0.0107142	yes		0.32239	0.578465	0.33985	0.519371	no		0.32879	0.608086	0.32215	0.501093	no
	maa	U00096.3:479366-479918		25.4526	21.2572	7.25027	19.8674	31.7942		-0.25986	-0.50289	0.4	0.579798	no		-1.81171	-2.80567	5e-05	0.000456756	yes		-0.357412	-0.663967	0.26385	0.436694	no		0.320952	0.620265	0.28485	0.460617	no
	hha	U00096.3:480089-480308		191.053	189.492	62.7489	104.985	120.254		-0.0118409	-0.0249683	0.96325	0.977768	no		-1.60631	-2.70795	5e-05	0.000456756	yes		-0.863796	-1.65265	0.0103	0.0400994	yes		-0.667892	-1.26953	0.0376	0.109529	no
	tomB	U00096.3:480333-480708		63.4349	49.1242	16.7738	23.0886	29.497		-0.368843	-0.734088	0.2296	0.398817	no		-1.91907	-3.23063	5e-05	0.000456756	yes		-1.4581	-2.62699	5e-05	0.000456756	yes		-1.10471	-2.14901	0.00075	0.004887	yes
	acrB	U00096.3:481253-484403		47.3524	67.8281	51.3943	46.2762	45.8218		0.518444	1.1225	0.0598	0.155007	no		0.118169	0.256691	0.6684	0.800262	no		-0.0331673	-0.0720365	0.9055	0.947139	no		-0.0474026	-0.103733	0.8621	0.923641	no
	acrA	U00096.3:484425-485619		64.8615	81.887	69.229	54.8819	47.9816		0.336274	0.736414	0.19505	0.358436	no		0.094014	0.20709	0.71265	0.830172	no		-0.241031	-0.520888	0.35085	0.530783	no		-0.43488	-0.951595	0.09725	0.221302	no
	acrR	U00096.3:485760-486408		13.4193	8.0026	4.81981	4.342	9.06523		-0.745763	-1.26431	0.03855	0.11165	no		-1.47725	-2.16797	0.00095	0.00595243	yes		-1.62787	-2.47415	0.00055	0.00375442	yes		-0.56589	-0.969431	0.09975	0.225395	no
	mscK	U00096.3:486535-489898		7.18808	11.0045	8.12673	6.9696	7.64639		0.61441	1.33046	0.0236	0.076297	no		0.177069	0.382687	0.5001	0.669461	no		-0.0445312	-0.0968643	0.86865	0.927156	no		0.0891716	0.190967	0.7405	0.848823	no
	ybaM	U00096.3:490109-490271		45.6431	96.384	61.4161	116.874	96.6874		1.0784	0.988346	0.1096	0.240708	no		0.42822	0.473195	0.5429	0.704564	no		1.35648	1.27051	0.047	0.129499	no		1.08293	0.960968	0.1091	0.239985	no
	priC	U00096.3:490284-490812		5.37528	5.19753	4.15682	2.35387	6.77107		-0.0485137	-0.0559934	0.94545	0.968547	no		-0.370861	-0.409992	0.51225	0.679653	no		-1.1913	-1.18484	0.0726	0.179381	no		0.333043	0.395733	0.50725	0.675472	no
	ybaN	U00096.3:490881-491259		4.69004	4.69173	4.27883	2.17055	3.33086		0.000522374	0.000436069	0.93215	0.961199	no		-0.132383	-0.102909	0.8544	0.919102	no		-1.11154	-0.68215	0.19425	0.357446	no		-0.493702	-0.387861	0.48775	0.658815	no
	apt	U00096.3:491411-491963		30.1368	70.7443	86.2384	76.0183	61.7257		1.23109	2.29127	0.00025	0.00190147	yes		1.5168	2.75861	5e-05	0.000456756	yes		1.33482	2.41578	0.0001	0.000855768	yes		1.03434	1.8701	0.0012	0.00723499	yes
	dnaX	U00096.3:492091-494023		14.6865	21.4166	38.4171	46.9917	43.5739		0.544237	1.16184	0.04315	0.121426	no		1.38726	2.91591	5e-05	0.000456756	yes		1.67792	3.55712	5e-05	0.000456756	yes		1.56897	3.31564	5e-05	0.000456756	yes
	recR	U00096.3:494075-495010		27.827	35.5351	100.15	120.904	104.281		0.352758	0.42934	0.483	0.654736	no		1.84761	2.28764	0.00095	0.00595243	yes		2.1193	2.71133	0.00015	0.00122022	yes		1.90592	2.35094	0.0002	0.00156767	yes
	ybaB	U00096.3:494075-495010		159.277	287.539	691.33	626.981	731.382		0.852219	1.44863	0.0154	0.0547587	no		2.11784	3.52257	5e-05	0.000456756	yes		1.97688	3.08955	5e-05	0.000456756	yes		2.19909	3.69292	5e-05	0.000456756	yes
	htpG	U00096.3:495119-496994		273.76	237.403	209.602	655.217	708.565		-0.205576	-0.429717	0.50155	0.670695	no		-0.385259	-0.753722	0.21255	0.378962	no		1.25906	2.55955	5e-05	0.000456756	yes		1.37199	2.81533	5e-05	0.000456756	yes
	adk	U00096.3:497174-497819		121.99	182.3	131.973	130.322	122.88		0.579548	1.26622	0.03475	0.10293	no		0.113479	0.245119	0.6687	0.800441	no		0.0953181	0.203129	0.7242	0.838372	no		0.0104785	0.0225985	0.96785	0.980199	no
	aes	U00096.3:498054-499973		3.20822	1.15479	1.86372	0.407316	0.628557		-1.47414	-1.04962	0.13925	0.284855	no		-0.783584	-0.612168	0.3177	0.496328	no		-2.97755	-1.31173	0.099	0.224203	no		-2.35166	-1.30148	0.08195	0.195904	no
	hemH	U00096.3:498054-499973		8.1902	8.08823	7.85514	5.02529	5.58442		-0.0180743	-0.0309857	0.9511	0.971513	no		-0.0602613	-0.097549	0.86555	0.92546	no		-0.704691	-1.18389	0.0634	0.162132	no		-0.552491	-0.898423	0.13865	0.283954	no
	gsk	U00096.3:500124-501429		19.3475	32.8799	20.9136	19.1209	20.8921		0.765058	1.67354	0.00525	0.0235126	yes		0.112295	0.237578	0.6822	0.809624	no		-0.0169971	-0.0360814	0.9486	0.970097	no		0.11081	0.2365	0.68215	0.809619	no
	ybaL	U00096.3:501561-503238		12.9293	12.3787	12.9662	13.704	13.8376		-0.0627884	-0.139732	0.81635	0.897169	no		0.00410473	0.00888235	0.99245	0.993642	no		0.0839542	0.184983	0.75725	0.860002	no		0.0979456	0.218413	0.7118	0.82949	no
	fsr	U00096.3:503475-504696		8.49021	4.06602	2.7261	4.86688	4.09936		-1.06218	-1.88134	0.0033	0.0162968	yes		-1.63897	-2.42335	0.00035	0.00253827	yes		-0.802805	-1.41667	0.01955	0.0660709	no		-1.0504	-1.86222	0.00315	0.0156736	yes
	ushA	U00096.3:504913-506566		21.1774	15.9867	15.8842	13.6189	14.6577		-0.405655	-0.923427	0.1286	0.269466	no		-0.414935	-0.943425	0.12185	0.259502	no		-0.63692	-1.40661	0.0162	0.0569541	no		-0.530868	-1.18191	0.04785	0.131252	no
	ybaK	U00096.3:506602-507082		15.3111	20.116	12.9337	10.6323	11.1272		0.39377	0.678601	0.25945	0.432282	no		-0.243445	-0.385573	0.5165	0.683371	no		-0.526126	-0.807978	0.1751	0.333137	no		-0.460488	-0.721867	0.23125	0.400626	no
	chiX	U00096.3:507203-508080		5201.77	10497.7	6112.4	6621.88	5020.76		1.013	1.67198	0.0053	0.0236947	yes		0.232737	0.372341	0.56075	0.718793	no		0.34824	0.589897	0.31945	0.498157	no		-0.0510959	-0.0804282	0.89395	0.94126	no
	ybaP	U00096.3:507203-508080		5.75482	3.12423	2.1621	1.80937	2.84954		-0.881271	-0.610951	0.2756	0.45019	no		-1.41234	-0.441054	0.22655	0.395295	no		-1.66928	-0.890822	0.14175	0.288201	no		-1.01404	-0.67293	0.2304	0.399725	no
	ybaQ	U00096.3:508217-508559		21.2849	5.25021	1.73356	7.03296	6.00558		-2.01938	-2.09576	0.00505	0.0228065	yes		-3.61801	-2.87534	0.03175	0.096104	no		-1.59762	-2.05033	0.009	0.0360866	yes		-1.82545	-1.91919	0.00615	0.0267505	yes
	copA	U00096.3:508874-511379		6.51757	7.09631	7.53309	6.84753	6.28686		0.122734	0.258886	0.6604	0.794679	no		0.208908	0.438244	0.456	0.630915	no		0.0712477	0.149558	0.8019	0.888077	no		-0.0519948	-0.108608	0.85735	0.920883	no
	glsA	U00096.3:511640-512573		1.36476	2.8187	12.0548	11.4816	12.8285		1.04638	1.11802	0.07455	0.183029	no		3.14289	3.75203	5e-05	0.000456756	yes		3.0726	3.69969	0.0001	0.000855768	yes		3.23264	3.88896	5e-05	0.000456756	yes
	ybaT	U00096.3:512575-513868		1.91515	1.53025	5.43131	5.62049	5.8487		-0.323684	0	1	1	no		1.50385	2.29503	0.00155	0.00889096	yes		1.55324	2.41478	0.0011	0.00673872	yes		1.61066	2.51681	0.0008	0.005153	yes
	cueR	U00096.3:513992-514400		8.62177	3.78239	1.48598	6.08043	6.01098		-1.18869	-1.25916	0.067	0.168869	no		-2.53657	-2.23429	0.0343	0.10188	no		-0.503811	-0.616992	0.3523	0.532327	no		-0.520384	-0.608748	0.34295	0.522596	no
[truncated: 3,973 more rows]
