# Supplementary material
Source: HighWire-hosted journal article supplement (doi:10.1101/rna.073288.119)
Supplement: Supplemental_Table_S2_Changes_in_RNA_levels.xlsx [file Supplemental_Table_S2_Changes_in_RNA_levels.xlsx]

## Sheet: Legend
	Table S3: Variation of RNA levels. Transcripts whose levels vary at least 4-fold (threshold) taking as reference the abundance measured at the origine of the kinetic (t0). Values provided are the logarithm of the ratio between means at the experimental time point ti and t0. Each table 'Sig.Changes ti_t0' compiles transcripts whose levels change between t0 and ti, but whose levels are below the th…
	Column name	Description	Time
	RNA pattern & comments	Feature of the RNA pattern over the kinetic	all
	CDS (synonyms)	DNA portion transcribed encoding for a protein or a non-protein coding RNA	all
	locus	Locus description	all
	x_t0	Expression level (mean)	0 min
	x_t5	Expression level (mean)	5 min
	x_t10	Expression level (mean)	10 min
	x_t15	Expression level (mean)	15 min
	x_t20	Expression level (mean)	20 min
	r_t5	Log-ratio	t5 versus t0
	s_t5	Significance	t5 versus t0
	r_t10	Log-ratio	t10 versus t0
	s_t10	Significance	t10 versus t0
	r_t15	Log-ratio	t15 versus t0
	s_t15	Significance	t15 versus t0
	r_t20	Log-ratio	t20 versus t0
	s_t20	Significance	t20 versus t0
	Comments & References	Gene known or predicted to be transcribed by the RNA polymerase loaded with σE (σE-RNAP) are marked in red. Experimentally mapped or predicted transcription start sites (TSS) are reported only for genes transcribed by σE-RNAP. When additional TSSs have been reported for those genes, they are also mentionned as well as the associated sigma factor when known. Operon encompassing σE-dependent genes …

## Sheet: RNA Change t5
	RNA pattern & comments	CDS (synonyms)	locus		x_t0	x_t5	x_t10	x_t15	x_t20		r_t5	s_t5		r_t10	s_t10		r_t15	s_t15		r_t20	s_t20		Comments & References at https://ecocyc.org/ and http://regulondb.ccg.unam.mx/index.jsp
	Increased RNA levels	bacA	U00096.3:3203309-3204131		22.3861	104.01	800.19	926.55	624.346		2.21604	yes		5.15967	yes		5.37119	yes		4.80167	yes		σE-TSS
		bamA ( yzzY, yzzN, ecfK, yaeT)	U00096.3:197927-200360		88.0846	413.822	2799.72	3159.58	2088.94		2.23205	yes		4.99025	yes		5.1647	yes		4.56773	yes		σE-TSS. (bamA hlpA lpxD fabZ lpxAB rnhB dnaE)
		bamB	U00096.3:2637473-2638652		63.4593	449.229	1927.3	1917.87	1628.71		2.82355	yes		4.9246	yes		4.91753	yes		4.68175	yes		σE-TSS inside yfgM. (bamB der)
		bamC	U00096.3:2597830-2598865		87.6846	490.187	3444.28	3950.56	3114.18		2.48294	yes		5.29574	yes		5.49359	yes		5.15039	yes		1 σE-TSS inside dapA, 1 σD-TSS for (dapA bamC)
		bamE (smpA)	U00096.3:2753604-2753946		337.179	3410.17	15231.1	11799.9	8532.53		3.33826	yes		5.49736	yes		5.12911	yes		4.66139	yes		σE-TSS
		bepA	U00096.3:2616093-2617557		12.102	104.009	573.949	514.733	583.663		3.10339	yes		5.56761	yes		5.41051	yes		5.59182	yes		σE-TSS and 1 TSS but unspecified sigma. (bepA yfgD)
		bhsA	U00096.3:1169072-1169330		5.77972	55.7712	66.0815	55.7638	12.9932		3.27045	yes		3.51518	yes		3.27026	yes		1.16869	no		σE-TSS, σD-TSS.
		cca	U00096.3:3201890-3203129		15.7671	181.947	777.076	928.325	587.149		3.52853	yes		5.62307	yes		5.87964	yes		5.21874	yes		2 σE-TSSs.(ygiMcca)
		chrR (yieF)	U00096.3:3894651-3895218		42.4409	235.419	1738.89	1391.52	723.606		2.4717	yes		5.35656	yes		5.03506	yes		4.09168	yes		σE-TSS. (yieEF)
		cutC/MicL	U00096.3:1958519-1959266		26.1686	156.878	237.928	278.415	167.359		2.58374	yes		3.18462	yes		3.41133	yes		2.67704	yes		σE-TSS inside cutC for micL, another upstream TSS with unspecified sigma inside cutC , and σD-TSS for cutC micL.
		deaD	U00096.3:3305970-3307933		17.4673	91.1669	106.215	86.5752	33.7418		2.38385	yes		2.60426	yes		2.3093	yes		0.949881	yes		σE-TSS inside yrbN, σD-TSS for (yrbN deaD)
		degP ( htrA, ptd)	U00096.3:180883-182308		42.7089	701.287	5917.57	9369.63	8115.03		4.0374	yes		7.11432	yes		7.77731	yes		7.56992	yes		σE-TSS
		der	U00096.3:2635883-2637356		23.8402	116.885	985.211	1123.89	607.002		2.29362	yes		5.36897	yes		5.55896	yes		4.67023	yes		σE-TSS inside yfgM. (bamB der)
		diaA	U00096.3:3295808-3296399		31.4926	188.077	1107.46	1302.62	1238.41		2.57823	yes		5.1361	yes		5.37026	yes		5.29733	yes		2 σE-TSSs inside diaA. (diaA yraP)
		dsbC	U00096.3:3038111-3038822		21.6418	109.816	819.17	1050.37	1027.17		2.3432	yes		5.24227	yes		5.60093	yes		5.56872	yes		σE-TSS. (dsbC recJ)
		eptB	U00096.3:3708783-3710475		5.13485	89.2254	539.025	681.116	538.197		4.11906	yes		6.71389	yes		7.05143	yes		6.71167	yes		σE-TSS
		fkpA	U00096.3:3476606-3477419		129.935	716.766	4617.63	5394.6	4911.18		2.46371	yes		5.15129	yes		5.37566	yes		5.24021	yes		1 σE-TSS and 1 TSS with unspecified sigma
		greA	U00096.3:3328238-3328715		31.889	414.5	1313.11	1057.92	503.332		3.70024	yes		5.36378	yes		5.05203	yes		3.98038	yes		σE-TSS, σD-TSS.
		lptA	U00096.3:3342272-3343937		54.8314	362.305	1872.6	1557.29	1694.95		2.72413	yes		5.0939	yes		4.8279	yes		4.9501	yes		σE-TSS. (lptAB rpoN hpf ptsN rapZ npr)
		lptB	U00096.3:3343943-3344669		26.5623	157.925	787.733	889.449	930.549		2.57179	yes		4.89026	yes		5.06546	yes		5.13063	yes		σE-TSS. (lptAB rpoN hpf ptsN rapZ npr)
		lpxP	U00096.3:2495644-2496565		1.35434	18.8557	59.7487	74.7453	75.7834		3.79934	yes		5.46325	yes		5.78633	yes		5.80623	yes		σE-TSS
		micA	U00096.3:2814801-2814879		6966.76	85835.3	319373	552905	339309		3.62301	yes		5.51861	yes		6.3104	yes		5.60597	yes		σE-TSS
		opgG (mdoA, mdoG)	U00096.3:1109334-1113406		31.6566	221.149	1399.63	1514.94	1579.99		2.80444	yes		5.46639	yes		5.58062	yes		5.64127	yes		σE-TSS, σD-TSS. (opgGH)
		pinR	U00096.3:1433083-1433674		1.27379	5.99701	41.8958	44.6762	24.3775		2.23512	yes		5.03961	yes		5.13231	yes		4.25836	yes		Predicted σE-TSS
		plaP	U00096.3:2085703-2087114		36.1863	152.146	173.148	161.345	71.5694		2.07195	yes		2.25849	yes		2.15664	yes		0.983899	yes		σE-TSS. (plaP yoeI)
		plsB	U00096.3:4254042-4256466		20.1296	190.898	1386.84	1498.43	1336.51		3.24541	yes		6.10634	yes		6.21799	yes		6.05301	yes		σE-TSS
		rnlB	U00096.3:2765917-2767355		52.409	437.933	1539.8	1321.15	1326.29		3.06282	yes		4.87678	yes		4.65584	yes		4.66144	yes		σE-TSS, σD-TSS both inside rnlA.
		rpoE	U00096.3:2709436-2710012		1294.58	80082.1	129138	81095.3	107789		5.95092	yes		6.64028	yes		5.96906	yes		6.37958	yes		σE-TSS. (rpoE rseABC)
		rpoH	U00096.3:3599928-3600783		119.316	529.514	2138.77	1980.45	1265.75		2.14988	yes		4.16392	yes		4.05296	yes		3.40713	yes		1 σE-TSS, 2 σD-TSSs,1 σD/σS-TSS, 1 σN-TSS
		rseA	U00096.3:2707321-2709404		122.231	2357.93	6642.92	3984.99	3997.46		4.26984	yes		5.76414	yes		5.0269	yes		5.0314	yes		σE-TSS. (rpoE rseABC)
		rseB	U00096.3:2707321-2709404		46.2893	365.192	876.194	754.166	658.473		2.9799	yes		4.2425	yes		4.02613	yes		3.83037	yes		σE-TSS. (rpoE rseABC)
		rseP	U00096.3:196545-197898		69.6992	614.58	2023.01	2332.08	1457.61		3.14039	yes		4.85922	yes		5.06433	yes		4.38632	yes		σE-TSS
		sbmA	U00096.3:396638-397859		3.65885	92.9391	774.452	663.428	400.95		4.66683	yes		7.72564	yes		7.50241	yes		6.77589	yes		σE-TSS. (sbmA yaiW)
		sixA	U00096.3:2456326-2456812		23.0243	260.083	844.799	776.566	650.384		3.49774	yes		5.19738	yes		5.07588	yes		4.82006	yes		σE-TSS, σD-TSS
		xerD	U00096.3:3038846-3039743		24.4876	174.425	919.818	960.196	1010.92		2.83248	yes		5.23122	yes		5.2932	yes		5.36747	yes		σE-TSS inside xerD. σD-,σH- TSS. (dsbC recJ).
		yaiW	U00096.3:397871-398966		3.83247	42.5554	362.223	358.556	231.453		3.47299	yes		6.56246	yes		6.54778	yes		5.9163	yes		σE-TSS. (sbmA yaiW)
		ybfG	U00096.3:715946-716597		1.98291	289.327	2717.56	1943.2	1076.55		7.18894	yes		10.4205	yes		9.9366	yes		9.08459	yes		σE-TSS. (ybfHG)
		ydhI	U00096.3:1721024-1721261		7.19813	80.7314	332.269	306.929	385.499		3.48744	yes		5.52859	yes		5.41414	yes		5.74296	yes		σE-TSS. (ydhIJK)
		ydhJ	U00096.3:1721263-1724133		3.43665	14.4246	61.7415	71.3983	93.9453		2.06946	yes		4.16717	yes		4.37681	yes		4.77275	yes		σE-TSS. (ydhIJK)
		ydhK	U00096.3:1721263-1724133		1.5567	6.23111	38.6568	38.7197	43.302		2.001	yes		4.63416	yes		4.63651	yes		4.79788	yes		σE-TSS. (ydhIJK)
		yeaY	U00096.3:1889950-1890532		24.8852	162.643	841.734	910.935	996.439		2.70835	yes		5.08	yes		5.19399	yes		5.32342	yes		σE-TSS
		yfeK	U00096.3:2537341-2537716		7.67821	714.786	2910.04	2155.01	2173.96		6.5406	yes		8.56605	yes		8.13271	yes		8.14534	yes		σE-TSS. (yfeKS)
		yfeS	U00096.3:2537748-2538483		8.71286	624.859	1927.94	1264.03	1074.88		6.16424	yes		7.7897	yes		7.18067	yes		6.94682	yes		σE-TSS. (yfeKS)
		yfeY	U00096.3:2550640-2551216		27.1769	478.13	2982.99	4177.75	4001.97		4.13695	yes		6.77823	yes		7.2642	yes		7.20218	yes		σE-TSS. (yfeYX)
		yfgD	U00096.3:2617577-2617937		58.0993	235.572	1546.32	2297.54	2173.03		2.01958	yes		4.73418	yes		5.30543	yes		5.22505	yes		σE-TSS and 1 TSS but unspecified sigma. (bepA yfgD)
		yfgM	U00096.3:2638662-2639283		67.5116	676.516	2805.76	2822.91	2475.1		3.32492	yes		5.37711	yes		5.3859	yes		5.19621	yes		3 TSSs but unspecified sigma. σE-TSS inside yfgM. (yfgM bamB der)
		yggN	U00096.3:3100903-3101623		34.7707	700.441	4170.31	3397.23	2108.64		4.33232	yes		6.90614	yes		6.61034	yes		5.92229	yes		2 σE-TSSs and 1 TSS but unspecified sigma
		ygiM (htrG, ecfG)	U00096.3:3201206-3201827		30.9309	737.48	4023.87	3456.25	3120.43		4.57548	yes		7.02339	yes		6.80402	yes		6.65655	yes		σE-TSS. (ygiM cca)
		yhhQ	U00096.3:3609216-3609882		2.83774	11.4204	17.6427	16.1273	6.74554		2.00879	yes		2.63625	yes		2.50669	yes		1.24919	yes		2 predicted σE inside the CDS yhhQ
		yhjJ	U00096.3:3680443-3681940		9.44436	175.907	999.214	1040.64	843.8		4.21922	yes		6.7252	yes		6.7838	yes		6.4813	yes		σE-TSS
		yidQ	U00096.3:3867727-3868060		40.5101	381.605	1955.5	1711.9	1528		3.23573	yes		5.59311	yes		5.40117	yes		5.23722	yes		σE-TSS
		yieE	U00096.3:3893880-3894630		23.3879	297.203	1532.08	859.123	588.727		3.66761	yes		6.03358	yes		5.19903	yes		4.65376	yes		σE-TSS. (yieEF)
		yraP	U00096.3:3296408-3296984		28.2011	207.714	1210.49	1690.11	1296.21		2.88078	yes		5.4237	yes		5.90522	yes		5.52241	yes		2 σE-TSSs inside diaA. (diaA yraP)
	Decreased RNA levels	yfeC	U00096.3:2518466-2518811		36.7784	6.90562	4.61749	10.1945	17.7463		-2.41302	yes		-2.99368	yes		-1.85107	yes		-1.05134	yes		Predicted σE-TSS, 2 predicted σD-TSSs and 1 σD-TSS maped
		yhjX	U00096.3:3710798-3712007		264.663	6.10121	8.14151	3.51205	2.9794		-5.43892	yes		-5.02272	yes		-6.2357	yes		-6.47299	yes		Predicted σE- and σD-TSSs, and 1 σD-TSS maped
		yihM	U00096.3:4061164-4062145		13.9184	1.49328	5.93339	5.30388	9.20814		-3.22043	yes		-1.23006	yes		-1.39187	yes		-0.596008	no		4 predicted TSSs including 1 σE-TSS. (yihLM)
		yihN	U00096.3:4062246-4063512		4.64161	0.362357	2.00645	1.51031	1.94801		-3.67914	yes		-1.20998	yes		-1.61978	yes		-1.25262	yes		Predicted σE-TSS
		yjjM (igoR)	U00096.3:4594936-4595851		6.3459	0.720873	0.589201	1.51172	3.04585		-3.13801	yes		-3.42899	yes		-2.06963	yes		-1.05898	yes		Predicted σE-TSS
		yqeF	U00096.3:2984410-2985592		26.4752	6.03741	3.09512	10.1459	22.4545		-2.13264	yes		-3.09658	yes		-1.38374	yes		-0.237637	no		3 predicted σE-TSSs
	Alternate expression	ahpF	U00096.3:639752-641318		49.5784	214.411	54.3213	29.3905	26.3237		2.1126	yes		0.131807	no		-0.754363	yes		-0.913349	yes		σE-TSS within ahpC, upstream ahpF. 2 σD-TSSs for (ahpCF)
		mglC	U00096.3:2236742-2237753		38.6621	2.46181	3.26874	5.64293	50.9187		-3.97313	yes		-3.56412	yes		-2.77641	yes		0.397276	no		Predicted promoters inside mglA: 2 σE-TSSs and 1 σH-TSS; 2 σD-TSSs. (mglBAC)
	Alternate or transient expression	acs	U00096.3:4285412-4287371		4.73997	0.768271	1.00834	2.56881	24.1975		-2.62519	yes		-2.23289	yes		-0.883777	no		2.35191	yes
		aldA	U00096.3:1488231-1489671		156.5	13.8884	9.11914	20.7097	210.136		-3.49421	yes		-4.10112	yes		-2.91779	yes		0.425161	no
		aphA	U00096.3:4269413-4270127		90.6517	5.9693	5.77409	5.73097	22.4141		-3.9247	yes		-3.97267	yes		-3.98348	yes		-2.01593	yes
		araC	U00096.3:70386-71265		17.0736	4.05888	7.37168	5.56309	19.6455		-2.07261	yes		-1.2117	yes		-1.6178	yes		0.202433	no
		csiE	U00096.3:2665434-2667846		13.1447	1.30926	0.268909	2.08247	8.49355		-3.32766	yes		-5.61122	no		-2.65812	yes		-0.630041	no
		cspD	U00096.3:922365-922590		612.188	120.759	90.1495	95.8862	255.311		-2.34185	yes		-2.76358	yes		-2.67458	yes		-1.26172	yes
		dctA	U00096.3:3682160-3683447		146.889	27.5705	23.5154	50.5123	144.756		-2.41352	yes		-2.64305	yes		-1.54002	yes		-0.0210975	no
		dppA	U00096.3:3706097-3707705		24.0808	5.13958	4.9478	8.01045	18.4095		-2.22816	yes		-2.28302	yes		-1.58793	yes		-0.387429	no
		dps	U00096.3:848407-848911		53.4717	325.807	153.987	29.2617	19.0391		2.60717	yes		1.52596	yes		-0.869763	yes		-1.48981	yes
		fadE	U00096.3:240858-243303		5.59623	1.05343	0.795533	1.27279	5.37588		-2.40936	yes		-2.81446	yes		-2.13646	yes		-0.0579541	no
		fucR	U00096.3:2939367-2940099		30.2061	7.22489	4.05847	4.86093	12.4537		-2.06379	yes		-2.89583	yes		-2.63553	yes		-1.27827	yes
		galS	U00096.3:2240627-2241668		7.27726	0.721033	0.45885	1.42643	10.224		-3.33526	yes		-3.9873	yes		-2.35098	yes		0.490495	no
		glgS	U00096.3:3191738-3191939		168.087	35.2852	14.9611	26.9598	100.752		-2.25207	yes		-3.48992	yes		-2.64033	yes		-0.738398	no
		glpA	U00096.3:2352646-2356711		26.9021	3.58246	7.50385	9.48505	37.5792		-2.90869	yes		-1.84202	yes		-1.50399	yes		0.482216	no
		glpB	U00096.3:2352646-2356711		26.2897	2.97318	12.2756	11.406	36.4664		-3.14442	yes		-1.0987	no		-1.20471	no		0.472071	no
		glpC	U00096.3:2352646-2356711		17.7941	1.69969	7.33024	5.74324	26.7248		-3.38806	yes		-1.27947	no		-1.63146	no		0.586778	no
		glpF	U00096.3:4117244-4118090		143.63	19.439	19.1058	44.6036	160.408		-2.88533	yes		-2.91027	yes		-1.68713	yes		0.159387	no
		glpT	U00096.3:2351015-2352374		257.075	58.8144	23.9411	31.5671	224.068		-2.12794	yes		-3.42463	yes		-3.02569	yes		-0.198247	no
		gntP	U00096.3:4549952-4551296		9.08386	1.46741	2.35703	3.1292	12.486		-2.63003	yes		-1.94634	yes		-1.53751	yes		0.458936	no
		grxA	U00096.3:890495-890753		25.3912	180.33	22.6539	10.6066	9.8262		2.82824	yes		-0.164573	no		-1.25937	no		-1.36962	no
		katG	U00096.3:4133834-4136015		38.3437	176.424	73.5902	27.5618	20.5906		2.20198	yes		0.940525	yes		-0.476319	no		-0.897005	yes
		lldD	U00096.3:3777398-3781017		155.07	36.899	16.9444	33.2155	355.373		-2.07127	yes		-3.19405	yes		-2.22299	yes		1.19641	no
		lldP	U00096.3:3777398-3781017		109.745	8.68484	7.55289	62.2976	490.971		-3.65951	yes		-3.86098	yes		-0.8169	no		2.16149	yes
		lldR	U00096.3:3777398-3781017		175.141	31.7032	24.0077	65.289	712.293		-2.46581	yes		-2.86695	yes		-1.4236	no		2.02395	yes
		mglA	U00096.3:2237768-2239289		100.892	4.96382	11.6369	15.3997	140.787		-4.34522	yes		-3.11603	yes		-2.71184	yes		0.4807	no
		mglB	U00096.3:2239349-2240348		118.878	6.35636	11.8629	32.9463	267.614		-4.22514	yes		-3.32496	yes		-1.8513	yes		1.17066	yes
		nanT	U00096.3:3371083-3372574		38.0214	5.3195	2.44753	4.28739	37.8692		-2.83745	yes		-3.95742	yes		-3.14864	yes		-0.00578882	no
		preT	U00096.3:2234032-2236500		9.01652	1.39312	0.977498	1.41407	7.80197		-2.69425	yes		-3.20541	yes		-2.67271	no		-0.208733	no
		rbsA	U00096.3:3933777-3935283		22.4893	3.14155	4.65205	8.58915	14.7919		-2.83969	yes		-2.2733	yes		-1.38865	yes		-0.604429	no
		tnaA	U00096.3:3888729-3890145		391.388	75.5617	18.2084	7.31758	207.753		-2.37287	yes		-4.42592	yes		-5.74109	yes		-0.913732	yes
		tnaB	U00096.3:3890235-3891483		38.8563	2.04253	1.9986	0.71909	29.7789		-4.24972	yes		-4.28108	yes		-5.75583	yes		-0.383857	no
		treB	U00096.3:4464758-4466180		564.158	86.5167	33.2808	44.5974	232.204		-2.70505	yes		-4.08334	yes		-3.66107	yes		-1.28071	yes
		uspF	U00096.3:1435184-1435619		53.9826	8.92116	4.28593	6.98532	20.4911		-2.59719	yes		-3.65481	yes		-2.9501	yes		-1.3975	yes
		ygeV	U00096.3:3004007-3005786		11.1273	1.32214	1.99799	3.96619	12.9696		-3.07315	yes		-2.47748	yes		-1.48827	yes		0.221037	no
		ykgE	U00096.3:321607-322327		11.0947	2.00594	1.02781	2.25892	9.51998		-2.46752	yes		-3.43223	yes		-2.29617	yes		-0.220846	no
		ynfK	U00096.3:1665314-1667219		28.5846	2.83235	3.08905	5.26789	13.9739		-3.33517	yes		-3.21	no		-2.43994	yes		-1.03251	yes
		yqeC	U00096.3:3014286-3015057		3.45878	0.432128	1.51063	0.207418	4.5038		-3.00073	yes		-1.19512	no		-4.05965	no		0.380879	no
	Increased or decreased RNA levels	actP	U00096.3:4283252-4285213		2.93657	0.638184	0.933344	2.46364	8.9574		-2.20209	yes		-1.65365	yes		-0.253337	no		1.60895	yes
		alsB	U00096.3:4311106-4312042		8.78953	1.80816	1.00589	0.983291	2.35179		-2.28127	yes		-3.12732	yes		-3.1601	yes		-1.90203	yes
		argC	U00096.3:4155000-4156005		2.821	0.699418	0.418842	0.954955	0.847993		-2.01198	yes		-2.75173	no		-1.5627	no		-1.73408	no
		aspA	U00096.3:4366890-4368327		332.147	48.3887	25.289	37.5355	112.637		-2.77908	yes		-3.71524	yes		-3.14549	yes		-1.56014	yes
		atoC	U00096.3:2320042-2323251		2.74445	0.571075	2.15087	3.21084	4.13069		-2.26476	yes		-0.351598	no		0.226436	no		0.589866	no
		bsmA	U00096.3:4416440-4416770		78.8839	10.9571	19.3947	8.33597	24.59		-2.84786	yes		-2.02407	yes		-3.24231	yes		-1.68166	yes
		bssR	U00096.3:878247-878631		20.4949	2.65098	8.07454	5.14399	6.98928		-2.95067	yes		-1.34382	yes		-1.99431	yes		-1.55205	yes
		caiD	U00096.3:35376-36162		0.984223	6.02505	68.9271	113.294	101.227		2.61391	yes		6.12994	yes		6.84687	yes		6.68439	yes
		caiE	U00096.3:34780-35371		3.27981	16.6582	276.055	366.446	313.878		2.34455	yes		6.3952	yes		6.80385	yes		6.58045	yes
		casC	U00096.3:2881050-2882142		0.870863	3.73913	18.1556	23.3758	27.5573		2.10219	yes		4.38183	yes		4.74642	yes		4.98384	yes
		chiP	U00096.3:708333-709740		3.4939	0.323501	1.01699	0.875756	4.59176		-3.433	yes		-1.78054	yes		-1.99624	yes		0.394211	no
		csrD	U00096.3:3401391-3403332		7.70388	92.4614	328.01	324.575	255.745		3.58519	yes		5.41201	yes		5.39682	yes		5.05298	yes
		dmlR	U00096.3:1880885-1881809		6.16074	0.652219	2.39198	2.29209	5.59875		-3.23967	yes		-1.3649	yes		-1.42644	yes		-0.137997	no
		dsdC	U00096.3:2476693-2477629		12.3528	3.01204	1.50297	2.73043	5.40514		-2.03602	yes		-3.03896	yes		-2.17764	yes		-1.19244	yes
		dsdX	U00096.3:2477846-2479184		27.5275	3.44221	2.21413	2.06827	11.8787		-2.99947	yes		-3.63606	yes		-3.73437	yes		-1.2125	yes
		dtpC	U00096.3:4354953-4356411		0.847817	11.2238	85.5557	103.242	94.8289		3.72667	yes		6.65697	yes		6.92806	yes		6.80543	yes
		exuT	U00096.3:3245103-3246522		5.54987	1.2613	2.5807	1.96134	9.03997		-2.13755	yes		-1.10469	yes		-1.50061	yes		0.703864	no
		fadA	U00096.3:4027608-4028772		4.07607	0.895012	1.3344	2.74378	9.92293		-2.1872	yes		-1.61099	yes		-0.571013	no		1.28359	yes
		fnrS	U00096.3:1409128-1409250		999.036	104.315	16.6683	17.0354	51.0127		-3.25959	yes		-5.90536	no		-5.87393	no		-4.29161	no
		fucP	U00096.3:2934234-2935551		3.82571	0.284726	0.805888	1.52418	3.32656		-3.74808	yes		-2.24708	yes		-1.3277	yes		-0.201698	no
		hcaR	U00096.3:2668005-2668896		14.4717	3.13403	6.15433	11.3679	23.1229		-2.20714	yes		-1.23356	yes		-0.348259	no		0.676091	no
		lamB	U00096.3:4247970-4249311		319.866	63.074	7.9695	3.51881	3.77727		-2.34235	yes		-5.32684	yes		-6.50624	yes		-6.40398	yes
		ligT	U00096.3:161500-162031		9.46935	2.23037	2.0179	3.20891	3.04484		-2.08598	yes		-2.23041	yes		-1.56118	yes		-1.6369	yes
		lsrR	U00096.3:1600287-1601241		9.65876	2.09748	3.42671	5.01341	6.77661		-2.20318	yes		-1.49501	yes		-0.946046	yes		-0.511273	no
		malF	U00096.3:4243530-4245075		57.5468	2.83106	5.3749	3.15379	4.59829		-4.34532	yes		-3.42043	yes		-4.18958	yes		-3.64557	yes
		malG	U00096.3:4242625-4243516		64.0795	5.81509	8.67946	9.74643	8.93993		-3.46199	yes		-2.88419	yes		-2.71692	yes		-2.84153	yes
		malK	U00096.3:4246783-4247899		110.403	8.29961	3.43072	1.14776	1.0853		-3.73359	yes		-5.00812	yes		-6.58781	yes		-6.66854	yes
		malX	U00096.3:1699354-1700947		8.04365	1.07311	1.81098	2.66615	4.52408		-2.90605	yes		-2.15108	yes		-1.59309	yes		-0.830226	yes
		melR	U00096.3:4340719-4341628		6.29208	0.462927	1.25416	0.742461	4.39134		-3.76468	yes		-2.32681	yes		-3.08315	yes		-0.518875	no
		mnaT	U00096.3:1517881-1518846		10.3645	2.37981	2.68063	4.71229	3.77654		-2.12273	yes		-1.95101	no		-1.13715	no		-1.45652	no
		mreC	U00096.3:3398386-3399978		24.286	108.41	456.282	585.96	474.588		2.1583	yes		4.23173	yes		4.5926	yes		4.28848	yes
		murP	U00096.3:2546672-2548097		4.49331	0.825315	0.678475	2.09412	4.67153		-2.44476	yes		-2.72741	yes		-1.10143	yes		0.0561165	no
		murQ	U00096.3:2545772-2546669		9.35177	1.94788	2.2525	3.40833	12.831		-2.26334	yes		-2.05371	yes		-1.45617	yes		0.45632	no
		nanC	U00096.3:4538784-4539501		4.9919	0.947548	0.878739	1.36392	3.03094		-2.39732	yes		-2.50608	yes		-1.87183	yes		-0.719825	no
		nanM	U00096.3:4537658-4538765		6.99721	1.58519	6.00884	5.39527	8.13356		-2.14213	yes		-0.219692	no		-0.375083	no		0.217107	no
		napF	U00096.3:2300266-2303497		27.8014	1.63665	3.29953	2.881	2.814		-4.08634	yes		-3.07483	no		-3.27051	no		-3.30447	no
		narG	U00096.3:1279863-1286526		12.6661	2.39526	1.48045	1.43281	1.45098		-2.40272	yes		-3.09687	yes		-3.14405	yes		-3.12587	yes
		narK	U00096.3:1277956-1279348		7.32193	1.24653	0.932235	1.05111	0.988207		-2.55431	yes		-2.97346	yes		-2.80031	yes		-2.88934	yes
		nikA	U00096.3:3613666-3618582		8.52442	0.720939	0.708519	0.431421	0.335093		-3.56365	yes		-3.58872	no		-4.30443	yes		-4.66897	yes
		nirB	U00096.3:3494010-3496877		14.6923	1.57138	1.66435	1.19843	0.869074		-3.22495	yes		-3.14203	yes		-3.61585	yes		-4.07944	yes
		nmpC	U00096.3:574528-576825		361.221	75.4904	19.8936	14.399	16.812		-2.25852	yes		-4.18251	yes		-4.64885	yes		-4.42532	yes
		nrfA	U00096.3:4287763-4289200		2.49204	0.556889	1.50087	1.62809	1.53346		-2.16187	yes		-0.731529	no		-0.614146	no		-0.700541	no
		nupG	U00096.3:3105713-3106970		100.366	12.2183	7.92143	7.89837	19.3709		-3.03816	yes		-3.66337	yes		-3.66758	yes		-2.37331	yes
		phoB	U00096.3:417141-417831		12.6595	61.9155	230.418	300.108	233.117		2.29008	yes		4.18595	yes		4.56718	yes		4.20276	yes
		phoR	U00096.3:417888-419184		4.35019	19.7379	82.4812	88.4888	66.6327		2.18182	yes		4.24492	yes		4.34635	yes		3.93708	yes
		pqiA	U00096.3:1012000-1013254		4.89099	26.45	128.685	132.915	104.184		2.43507	yes		4.71758	yes		4.76423	yes		4.41286	yes
		pspF	U00096.3:1366934-1367912		5.36257	1.25009	1.43447	2.80881	2.60441		-2.10089	yes		-1.90241	yes		-0.932967	no		-1.04197	yes
		ptrA	U00096.3:2950634-2958884		10.202	137.079	953.58	945.852	796.877		3.74809	yes		6.54643	yes		6.53469	yes		6.28744	yes
		raiA	U00096.3:2737153-2737495		1457.76	159.832	113.179	127.604	263.479		-3.18912	yes		-3.68707	yes		-3.514	yes		-2.46799	yes
		rbsR	U00096.3:3938226-3940612		13.0927	2.94513	6.81098	5.30935	6.3947		-2.15235	yes		-0.942824	no		-1.30215	yes		-1.03381	no
		recC	U00096.3:2959059-2962428		7.81079	55.0015	197.034	174.372	210.152		2.81593	yes		4.65683	yes		4.48055	yes		4.74982	yes
		srlA	U00096.3:2825831-2827351		184.128	39.1293	14.4564	14.1105	58.9213		-2.23439	yes		-3.67093	yes		-3.70587	yes		-1.64385	yes
		srlM	U00096.3:2828620-2828980		71.4366	10.0084	9.33368	6.86982	19.503		-2.83545	yes		-2.93615	yes		-3.37832	yes		-1.87297	yes
		tdcA	U00096.3:3266126-3267065		5.28211	1.03408	0.725921	0.529516	3.47289		-2.35277	yes		-2.86323	yes		-3.31837	yes		-0.604977	no
		tdcB	U00096.3:3265038-3266028		5.96364	0.680965	2.54094	2.46029	3.46447		-3.13054	yes		-1.23083	yes		-1.27737	yes		-0.783561	no
		uidC	U00096.3:1691585-1692851		3.12346	0.604165	1.27232	1.83359	1.73339		-2.37013	yes		-1.29569	no		-0.768477	no		-0.849549	no
		uspC	U00096.3:1979752-1980181		22.6251	2.37061	6.72084	5.98041	7.50725		-3.2546	yes		-1.75121	yes		-1.91961	yes		-1.59157	yes
		yabI	U00096.3:71350-72115		5.85972	89.2427	365.487	327.7	362.109		3.92883	yes		5.96285	yes		5.8054	yes		5.94945	yes
		yagE	U00096.3:282277-283186		6.67531	1.24802	0.118131	1.46687	3.37257		-2.4192	yes		-5.82037	no		-2.1861	yes		-0.984988	no
		yagF	U00096.3:283200-285168		6.12978	1.4562	0.949944	0.843064	1.68477		-2.07362	yes		-2.68992	yes		-2.86212	yes		-1.86328	yes
		ybaQ	U00096.3:508217-508559		21.2849	5.25021	1.73356	7.03296	6.00558		-2.01938	yes		-3.61801	no		-1.59762	yes		-1.82545	yes
		ybhQ	U00096.3:824629-826108		15.2865	120.019	392.082	466.922	951.346		2.97293	yes		4.68082	yes		4.93285	yes		5.95964	yes
		ybiH	U00096.3:826118-830643		23.8741	5.3533	4.45988	4.50111	7.23179		-2.15694	yes		-2.42037	yes		-2.40709	yes		-1.72302	yes
		ydbD	U00096.3:1475143-1477450		0.309188	3.35907	20.6972	34.1	35.8721		3.4415	yes		6.06481	yes		6.78514	yes		6.85824	yes
		yfeW	U00096.3:2548101-2549406		3.63529	0.825629	1.29587	1.80698	5.32979		-2.13851	yes		-1.48815	yes		-1.00849	no		0.552009	no
		yhjC	U00096.3:3672413-3673313		11.0377	1.82072	0.539271	2.22893	3.48849		-2.59986	yes		-4.35528	yes		-2.30801	yes		-1.66176	yes
		yijD	U00096.3:4161123-4162130		128.739	708.651	3125.81	2702.9	2579.71		2.46063	yes		4.60171	yes		4.39199	yes		4.32469	yes
		yjaA	U00096.3:4213233-4213617		2.24527	20.6302	22.6409	19.1697	5.4343		3.19979	yes		3.33397	yes		3.09387	yes		1.2752	no
		yjjI	U00096.3:4614679-4617065		5.62729	0.417189	0.854745	0.641428	0.337621		-3.75367	yes		-2.71888	no		-3.13308	yes		-4.05896	no
		yncG	U00096.3:1526246-1526864		0.501896	5.25674	8.75323	3.62366	4.33813		3.38871	yes		4.12436	yes		2.85199	yes		3.11161	yes

## Sheet: RNA Change t10
	RNA pattern & comments	CDS (synonyms)	locus		x_t0	x_t5	x_t10	x_t15	x_t20		r_t5	s_t5		r_t10	s_t10		r_t15	s_t15		r_t20	s_t20		Comments & References at https://ecocyc.org/ and http://regulondb.ccg.unam.mx/index.jsp
	Significant change only after t5	alaW	U00096.3:2518155-2518231		3778820	4932010	16179500	8331980	5694870		0.384241	no		2.09816	yes		1.14072	yes		0.591727	no		4 predicted TSSs including 1 σE-TSS. (alaWX)
		alaX	U00096.3:2518040-2518116		3726250	5004940	17186600	8273020	5760180		0.42563	no		2.20549	yes		1.15069	yes		0.628391	no		4 predicted TSSs including 1 σE-TSS. (alaWX)
		etk	U00096.3:1042029-1044210		3.39899	4.96649	25.5161	32.2862	23.4888		0.547121	no		2.90823	yes		3.24774	yes		2.78879	yes		Predicted σE-TSS inside etp.
		dapA	U00096.3:2598881-2599760		159.086	226.127	723.062	970.204	938.357		0.507327	no		2.18431	yes		2.60848	yes		2.56033	yes		1 σE-TSS inside dapA, 1 σD-TSS for (dapA bamC)
		gudD	U00096.3:2918044-2919385		1.64744	2.32837	9.27882	13.5662	15.1095		0.499096	no		2.49372	yes		3.04172	yes		3.19716	yes		Predicted σE-TSS inside gudX. (gudPXD)
		gudX	U00096.3:2919405-2920746		0.500009	0.80267	4.28691	4.95689	4.09834		0.682853	no		3.09991	yes		3.30941	yes		3.03501	yes		Predicted σE-TSS inside gudX. (gudPXD)
		hcr	U00096.3:911181-912150		1.1185	1.59096	6.24648	4.21981	6.15157		0.508335	no		2.48148	yes		1.91561	yes		2.45939	yes		2 predicted σE-TSSs, and 1 σE-TSS mapped inside CDS lysO. (lysO hcp hcr)
		leuC	U00096.3:79463-80864		1.57788	2.85026	10.9466	12.6807	13.1569		0.853103	no		2.79442	yes		3.00658	yes		3.05976	yes		Predicted σE-TSS inside CDS leuC
		lptC	U00096.3:3342272-3343937		51.2883	100.073	283.863	275.119	326.973		0.964357	no		2.46849	yes		2.42335	yes		2.67247	yes		2 σE TSSs inside the ORF lptC
		lpxA	U00096.3:202559-205089		180.433	257.858	1335.42	2450.08	1552.11		0.515113	no		2.88776	yes		3.76329	yes		3.1047	yes		σE-TSS. (bamA-hlpA-lpxD-fabZ-lpxAB-rnhB-dnaE)
		lpxB	U00096.3:202559-205089		30.3385	66.9119	398.589	378.283	243.413		1.14111	no		3.71568	yes		3.64024	yes		3.00418	yes		σE-TSS. (bamA-hlpA-lpxD-fabZ-lpxAB-rnhB-dnaE)
		nhoA	U00096.3:1534023-1534869		2.31148	3.62488	43.7457	44.3879	30.8812		0.649115	no		4.24225	yes		4.26328	yes		3.73984	yes		Predicted σE-TSS
		npr	U00096.3:3347114-3348238		51.7422	132.411	605.575	607.172	598.245		1.35561	no		3.54889	yes		3.55269	yes		3.53132	yes		σE-TSS. (lptAB rpoN hpf ptsN rapZ npr)
		oxc	U00096.3:2490255-2491950		0.465416	0.727369	2.96501	5.24778	4.51963		0.644165	no		2.67144	yes		3.49511	yes		3.27961	yes		2 σE-TSSs predicted inside the CDS frc, and 2 σD-TSSs upstream. (yfdX frc oxc yfdVE)
		patD	U00096.3:1515577-1517002		0.817749	1.2173	4.57373	7.82251	7.86328		0.57395	no		2.48364	yes		3.2579	yes		3.2654	yes		2 σE-TSSs predicted inside the CDS ydcV. (ydcSTUV patD)
		rhsB	U00096.3:3619191-3623782		1.25364	1.97852	7.93034	9.8625	12.9285		0.658295	no		2.66126	yes		2.97583	yes		3.36635	yes		6 predicted TSSs: 3 σE- and 3 σD-dependent
		tmk	U00096.3:1154111-1156766		13.9066	32.5484	79.0752	87.9586	84.9224		1.22681	no		2.50745	yes		2.66105	yes		2.61037	yes		2 σE-TSSs and 1 σH-TSS predicted. (pabC mltG tmk holB ycfH)
		yaiO	U00096.3:380068-380842		1.21847	0.954226	10.839	11.0565	8.77222		-0.352671	no		3.15309	yes		3.18175	yes		2.84787	yes		3 Predicted TSSs including 1 σE-TSS
		ybaB	U00096.3:494075-495010		159.277	287.539	691.33	626.981	731.382		0.852219	no		2.11784	yes		1.97688	yes		2.19909	yes		σE-TSS inside upstream CDS dnaX. (ybaB recR)
		ycjD	U00096.3:1351406-1351760		3.56228	10.6428	20.418	7.49348	9.28966		1.579	no		2.51896	yes		1.07283	no		1.38282	no		Predicted σE-TSS inside upstream CDS sapF
		ydhT	U00096.3:1748746-1749559		0.706336	0.670893	7.41335	2.0916	1.94503		-0.0742726	no		3.3917	yes		1.56618	no		1.46137	no		Predicted σE-TSS
		yfdV	U00096.3:2489241-2490186		0.381275	0.814049	3.44829	2.8685	3.19725		1.09428	no		3.17698	yes		2.91139	no		3.06793	no		2 predicted σE-TSSs inside the CDS frc, and 2 σD-TSSs upstream. (yfdX frc oxc yfdVE)
		yffO	U00096.3:2562110-2563117		2.48939	1.67376	27.057	37.0037	37.2808		-0.572697	no		3.44214	yes		3.89381	yes		3.90457	yes		3 predicted TSSs including 1 σE-TSS, and 1 σS mapped. (yffOP)
		yfjP	U00096.3:2767709-2768573		1.83646	3.83712	14.8641	17.0568	14.2611		1.06309	no		3.01683	yes		3.21534	yes		2.95708	yes		3 Predicted TSSs including 1 σE-TSS. (yfjPQ)
		ygbN	U00096.3:2865100-2866465		0.806807	0.754904	3.89957	2.65388	2.38619		-0.0959289	no		2.27302	yes		1.71781	yes		1.56441	no		Predicted σE-TSS inside upstream CDS ygbM
		ygeY	U00096.3:3008763-3009975		0.776618	1.34946	8.16221	15.7763	20.0323		0.797107	no		3.39368	yes		4.34441	yes		4.68898	yes		2 Predicted σE-TSSs inside CDS ygeY
		ygfS	U00096.3:3028523-3030931		2.13904	3.16201	17.1858	21.3133	18.33		0.563876	no		3.00618	yes		3.31672	yes		3.09917	yes		Predicted σE-TSS inside upstream CDS ygfT
		yghF	U00096.3:3112092-3112941		1.55065	4.07219	7.51016	7.00743	8.25885		1.39294	no		2.27597	yes		2.17602	yes		2.41307	yes		σE TSS inside the CDS yghF
		ygiD	U00096.3:3181618-3182407		1.3542	2.27046	8.51784	14.2329	9.02161		0.745547	no		2.65305	yes		3.39372	yes		2.73595	yes		2 Predicted σE-TSSs
		yhaI	U00096.3:3252910-3253267		1.65582	3.15364	16.2444	25.4295	12.0367		0.929476	no		3.29433	yes		3.94089	yes		2.86183	no		4 Predicted TSSs including 2 σE-TSSs
		yieH	U00096.3:3896773-3897439		9.30994	6.31716	43.2239	39.2438	35.4393		-0.559497	no		2.21498	yes		2.07562	yes		1.92851	yes		Predicted: 1 σE-TSSs and 1 σD-TSS
		yihQ	U00096.3:4067239-4069276		0.251212	0.336885	2.93895	5.31141	7.78481		0.423352	no		3.54832	yes		4.40212	yes		4.95368	yes		Predicted: 1 σE-TSSs and 2 σD-TSSs
		yiiS	U00096.3:4112966-4113266		144.321	212.999	1173.89	2418.74	2983.46		0.561567	no		3.02394	yes		4.0669	yes		4.36963	yes		σE-TSS. (yiiSuspD)
		yjjL (igoT)	U00096.3:4593360-4594722		2.90711	2.33141	12.6805	16.7566	16.4085		-0.318382	no		2.12495	yes		2.52707	yes		2.49678	yes		4 predicted TSSs including 3 σE-TSSs
		ypjA	U00096.3:2778145-2782726		1.03156	1.55729	7.24077	10.346	15.238		0.594215	no		2.81132	yes		3.32619	yes		3.88478	yes		σE-TSS predicted
		ytfQ	U00096.3:4449961-4450918		4.54373	5.77272	34.499	51.7984	60.1921		0.345376	no		2.92461	yes		3.51096	yes		3.72762	yes		Predicted σE-TSS. (yftQRTF)
		ytfR	U00096.3:4451057-4452560		0.843453	1.0307	7.02943	6.68861	11.5999		0.289246	no		3.05903	yes		2.98733	yes		3.78166	yes		Predicted σE-TSS. (yftQRTF)
		znuA	U00096.3:1941650-1942583		67.8613	106.455	344.785	308.703	403.252		0.649588	no		2.34504	yes		2.18556	yes		2.57102	yes		3 predicted σE-TSSs inside znuA; 1 σS-TSS upstream the operon. (znuA mepM)
	RNA patterns follow the path of change observed in the time maps t5-0 and reach the imposed threshold by t10	apaH	U00096.3:50379-51222		10.0842	17.5444	61.1138	66.4231	90.2389		0.798915	yes		2.5994	yes		2.71959	yes		3.16165	yes		Predicted σE-TSS inside CDS apaG and upsstream surA. 1 σE-TSS and 2 σD-TSSs upstream lptD. (lptD surA pdxA rsmA apaGH)
		bamD (yfiO)	U00096.3:2736145-2736883		165.217	557.538	4838.83	5817.91	5011.61		1.75471	yes		4.87222	yes		5.13807	yes		4.92284	yes		2 σE-TSSs
		clpX	U00096.3:457425-458700		158.848	385.131	1657.02	2004.5	1756.04		1.2777	yes		3.38287	yes		3.65752	yes		3.46661	yes		σE-TSS inside CDS clpP. 3 other promoters upstream clpX (1 σD-TSS, 1 σH-TSS and unspecied sigma-TSS). (clpPX)
		dnaE	U00096.3:205125-208608		15.7204	32.6515	149.075	169.894	132.128		1.05451	yes		3.24533	yes		3.43392	yes		3.07123	yes		σE-TSS. (bamA-hlpA-lpxD-fabZ-lpxAB-rnhB-dnaE)
		dnaG	U00096.3:3211106-3212852		27.4821	106.063	235.561	216.488	166.805		1.94836	yes		3.09954	yes		2.97772	yes		2.6016	yes		σE-TSS inside dnaG. 5 σD-TSSs and 1 σH-TSS. (rpsU dnaG rpoD)
		fabZ	U00096.3:202100-202556		201	454.13	2074.61	2513.71	1923.66		1.17591	yes		3.36758	yes		3.64455	yes		3.25859	yes		σE-TSS. (bamA hlpA lpxD fabZ pxAB rnhB dnaE)
		holB	U00096.3:1154111-1156766		12.7765	35.3159	82.5883	67.2905	60.1803		1.46683	yes		2.69245	yes		2.39691	yes		2.2358	yes		2 σE-TSSs and 1 σH-TSS predicted. (pabC mltG tmk holB ycfH)
		hpf	U00096.3:3346172-3346460		193.086	373.396	2183.17	2451.52	2922.22		0.95146	yes		3.49911	yes		3.66636	yes		3.91975	yes		2 σE-TSSs. (lptAB rpoN hpf ptsN rapZ npr)
		lepA	U00096.3:2705324-2707124		36.0348	69.9741	181.774	166.808	132.243		0.95743	yes		2.33468	yes		2.21072	yes		1.87573	yes		σE-TSS predicted inside lepA. 1 TSS with unspecified sigma upstream the operon. (lepAB)
		lepB	U00096.3:2704334-2705309		40.0785	65.0637	163.474	155.742	128.971		0.699024	yes		2.02816	yes		1.95826	yes		1.68614	yes		σE-TSS predicted inside lepA. 1 TSS with unspecified sigma upstream the operon. (lepAB)
		lptD	U00096.3:54754-57109		45.8438	97.3436	297.499	358.33	352.797		1.08636	yes		2.69809	yes		2.96649	yes		2.94404	yes		σE-TSS and 2 σD-TSSs. (lptD surA pdxA)
		lpxD	U00096.3:200970-201996		119.916	270.394	2432.01	3787.5	2445.7		1.17303	yes		4.34205	yes		4.98114	yes		4.35015	yes		σE-TSS. (bamA-hlpA-lpxD-fabZ-lpxAB-rnhB-dnaE)
		lysS	U00096.3:3033656-3035174		91.66	153.025	547.008	776.107	723.877		0.739404	yes		2.5772	yes		3.08189	yes		2.98138	yes		2 σE-TSSs, upstream CDS dsbC and inside CDS xerD, and 1 σD/H-TSS. (xerD dsbC recJ prfB lysS)
		malQ	U00096.3:3547985-3550070		45.1487	77.5362	511.259	472.221	384.317		0.780185	yes		3.5013	yes		3.38671	yes		3.08954	yes		σE-TSS inside CDS malP and σD for (malPQ)
		mepM (yebA)	U00096.3:1940312-1941635		29.3842	61.2329	264.422	291.325	394.97		1.05927	yes		3.16973	yes		3.30951	yes		3.74863	yes		3 predicted σE-TSSs inside znuA; 1 σS-TSS upstream the operon. (znuA mepM)
		mscM	U00096.3:4386046-4389370		5.85363	11.7992	62.7299	62.7449	69.7485		1.01129	yes		3.42175	yes		3.42209	yes		3.57476	yes		σE-TSS inside CDS rsgA. (psd mscM)
		opgH (mdoA, mdoH)	U00096.3:1109334-1113406		27.5594	89.6799	827.067	947.228	786.499		1.70224	yes		4.90739	yes		5.10309	yes		4.83483	yes		σE-TSS, σD-TSS. (opgGH)
		pabC	U00096.3:1153299-1154109		9.41673	19.9061	77.7816	83.6311	63.7007		1.07992	yes		3.04613	yes		3.15074	yes		2.75801	yes		Predicted 2 σE-TSSs and 1 σH-TSS. (pabC mltG tmk holB ycfH)
		prfB	U00096.3:3035183-3036282		49.9799	84.9153	279.488	469.629	442.354		0.764676	yes		2.48337	yes		3.2321	yes		3.14578	yes		2 σE-TSSs, upstream CDS dsbC and inside CDS xerD, and 1 σD/H-TSS. (xerD dsbC recJ prfB lysS)
		psd	U00096.3:4389391-4390360		38.016	134.03	678.44	608.755	603.24		1.81788	yes		4.15754	yes		4.00118	yes		3.98805	yes		σE-TSS inside CDS rsgA. (psd mscM)
		ptsN	U00096.3:3346577-3347069		46.6427	114.577	653.188	625.217	702.975		1.29659	yes		3.80777	yes		3.74463	yes		3.91375	yes		2 σE-TSSs. (lptAB rpoN hpf ptsN rapZ npr)
		recJ	U00096.3:3036372-3038106		15.7956	51.5247	598.363	897.637	769.055		1.70574	yes		5.24343	yes		5.82854	yes		5.60549	yes		σE-TSS. (dsbC recJ)
		rnlA	U00096.3:2765917-2767355		39.9344	98.3917	356.831	304.176	358.255		1.3009	yes		3.15953	yes		2.9292	yes		3.16528	yes		σE-TSS, σD-TSS both inside rnlA.
		rpoD	U00096.3:3213046-3214888		93.8946	201.733	1111.83	1370.07	1074.66		1.10333	yes		3.56575	yes		3.86706	yes		3.5167	yes		σE-TSS inside dnaG. 5 σD-TSSs and 1 σH-TSS. (rpsU dnaG rpoD)
		rpoN	U00096.3:3344716-3346150		47.0228	144.661	805.197	807.427	956.605		1.62124	yes		4.09791	yes		4.1019	yes		4.34649	yes		2 σE-TSSs. (lptAB rpoN hpf ptsN rapZ npr)
		rybB	U00096.3:887975-888054		651.688	2165.71	11300.4	27779.2	16534.8		1.73259	yes		4.11605	yes		5.41368	yes		4.66518	yes		σE-TSS
		skp (hlpA, ompH)	U00096.3:200481-200967		152.98	373.608	3087.67	6215.01	3684.43		1.28818	yes		4.3351	yes		5.34434	yes		4.59003	yes		σE-TSS. (lptAB rpoN hpf ptsN rapZ npr)
		surA	U00096.3:51608-54702		81.0622	264.22	1512.54	1682.06	1767.45		1.70464	yes		4.2218	yes		4.37506	yes		4.4465	yes		σE-TSS and 2 σD-TSSs. (lptD surA pdxA)
		uspD	U00096.3:4113292-4113721		63.9806	113.214	768.657	985.754	1350.56		0.823348	yes		3.58663	yes		3.94552	yes		4.39977	yes		σE-TSS. (yiiS uspD)
		ycfH	U00096.3:1156776-1157574		13.0164	26.9621	95.319	112.702	105.99		1.0506	yes		2.87243	yes		3.11411	yes		3.02552	yes		Predicted 2 σE-TSSs and 1 σH-TSS. (pabC mltG tmk holB ycfH)
		ydiY	U00096.3:1805324-1806083		7.69532	30.2524	38.1034	34.5896	21.3701		1.97499	yes		2.30787	yes		2.16829	yes		1.47354	yes		Predicted 1 σE- and 2 σDTSSs
		yfeX	U00096.3:2549645-2550545		22.3683	77.7691	403.796	569.611	387.573		1.79774	yes		4.1741	yes		4.67045	yes		4.11494	yes		σE-TSS. (yfeYX)
		yhbJ (rapZ)	U00096.3:3347114-3348238		37.6684	74.7958	516.347	495.793	549.618		0.989603	yes		3.77691	yes		3.71831	yes		3.867	yes		2 σE-TSSs. (lptAB rpoN hpf ptsN rapZ npr)
		yihF	U00096.3:4044198-4045629		0.878619	2.51899	9.50532	10.6781	7.67834		1.51953	yes		3.43543	yes		3.60328	yes		3.12749	yes		Predicted 2 σE-TSSs
		alaE	U00096.3:2799163-2799613		31.981	11.5346	7.7123	9.60424	5.59933		-1.47125	yes		-2.05199	yes		-1.73547	yes		-2.51389	yes		Predicted σE-TSS
		frdD	U00096.3:4379006-4379366		57.6573	21.9844	11.8632	14.004	21.728		-1.39102	yes		-2.28101	yes		-2.04166	yes		-1.40795	yes		Predicted 2 σE-TSSs inside upsteram CDS frdC.
		mtfA	U00096.3:2043650-2044448		57.4373	15.8875	10.936	13.1719	37.3889		-1.8541	yes		-2.39291	yes		-2.12453	yes		-0.61938	no		Predicted σE-TSS
		rihA	U00096.3:683476-684412		97.3057	29.0443	18.7348	9.26636	32.7774		-1.74427	yes		-2.3768	yes		-3.39245	yes		-1.56982	yes		Predicted σE-TSS inside the CDS gltL
		yfeD	U00096.3:2518812-2519205		22.0409	8.8149	2.8156	6.05179	12.6852		-1.32217	yes		-2.96867	yes		-1.86475	yes		-0.797037	no		Predicted 1 σE- and 2 σDTSSs, and 1 TSS mapped but unspecified sigma. (yfeCD)
		yfgG	U00096.3:2629289-2629481		258.797	86.8103	42.48	119.563	154.928		-1.57588	yes		-2.60696	yes		-1.11405	yes		-0.740218	no		Predicted 1 σE- and 2 σD-TSSs, and 1 TSS mapped but unspecified sigma
		ygiF	U00096.3:3199663-3200965		11.0593	7.39709	2.67325	3.00016	1.95903		-0.580235	no		-2.0486	yes		-1.88215	yes		-2.49705	yes		Predicted 2 σE-TSSs inside CDS ygiF
		yqhC	U00096.3:3154261-3155218		12.4384	5.33309	2.82694	5.47964	5.06305		-1.22175	yes		-2.13748	yes		-1.18264	yes		-1.29672	yes		Predicted σE-TSS inside the divergent CDS yqhD
	Significant change only after t5	aceA	U00096.3:4217108-4218413		64.5025	46.0414	15.3048	15.8894	29.1564		-0.486422	no		-2.07537	yes		-2.02129	yes		-1.14554	yes
		adhE	U00096.3:1295445-1298121		127.231	82.7068	27.7999	16.445	21.4625		-0.621372	no		-2.1943	yes		-2.95173	yes		-2.56756	yes
		agrB	U00096.3:3648293-3648377		1400.88	1208.22	315.36	1118.66	700.161		-0.213456	no		-2.15127	yes		-0.324565	no		-1.00058	no
		alsE	U00096.3:4306869-4308478		6.74591	7.21531	29.0279	33.0423	33.5974		0.0970481	no		2.10535	yes		2.29223	yes		2.31626	yes
		alsK	U00096.3:4306869-4308478		3.85663	3.16434	19.2045	23.7487	19.6947		-0.285436	no		2.31603	yes		2.62244	yes		2.3524	yes
		appA	U00096.3:1040616-1041915		1.68805	1.2482	9.04895	7.58602	6.63514		-0.435509	no		2.4224	yes		2.16799	yes		1.97477	yes
		appY	U00096.3:583680-584430		5.63518	4.06808	1.01646	1.46845	1.31548		-0.470115	no		-2.47092	yes		-1.94017	yes		-2.09887	yes
		araG	U00096.3:1983554-1985069		0.605512	0.621095	3.70575	3.87357	4.47751		0.0366581	no		2.61354	yes		2.67744	yes		2.88647	yes
		araH	U00096.3:1982553-1983540		0.622413	1.43854	3.31257	3.40151	4.82101		1.20866	no		2.41201	yes		2.45023	yes		2.95339	yes
		argI	U00096.3:4477306-4478311		1.57665	1.65296	6.96313	7.20025	5.95324		0.0681974	no		2.14288	yes		2.19119	yes		1.91682	yes
		arnB	U00096.3:2365927-2367067		0.659891	0.670748	4.88325	4.12995	4.0418		0.0235412	no		2.88754	yes		2.64582	yes		2.6147	yes
		aslA	U00096.3:3984351-3986007		0.580219	1.49581	7.42182	5.55168	9.49883		1.36626	no		3.6771	yes		3.25826	yes		4.03308	yes
		aslB	U00096.3:3982957-3984193		1.48003	3.12725	8.80891	10.8573	8.62165		1.07926	no		2.57333	yes		2.87497	yes		2.54233	yes
		atoB	U00096.3:2326108-2327293		0.538941	1.40942	2.29086	3.64872	4.21698		1.3869	no		2.08769	yes		2.75919	yes		2.96801	yes
		bglB	U00096.3:3902288-3903701		0.767652	0.230893	3.08014	3.1703	3.51432		-1.73323	no		2.00447	yes		2.0461	yes		2.19472	yes
		bglH	U00096.3:3900603-3902220		0.541111	0.316845	3.11201	4.93095	5.19341		-0.772147	no		2.52385	yes		3.18787	yes		3.26269	yes
		bioB	U00096.3:809343-812947		1.03813	1.62859	8.21091	9.70199	9.30675		0.649631	no		2.98355	yes		3.22429	yes		3.16429	yes
		bioF	U00096.3:809343-812947		1.56151	1.97141	6.83849	11.8775	9.75139		0.33629	no		2.13074	yes		2.92722	yes		2.64267	yes
		caiB	U00096.3:37897-39115		1.69342	2.37455	8.41035	11.5537	10.0054		0.487709	no		2.31222	yes		2.77035	yes		2.56276	yes
		caiC	U00096.3:36270-37824		0.861128	0.764303	5.05978	5.19394	6.47792		-0.172083	no		2.55477	yes		2.59253	yes		2.91123	yes
		casD	U00096.3:2879787-2881048		1.41759	2.06595	10.1042	16.6304	20.1524		0.543366	no		2.83344	yes		3.55231	yes		3.82944	yes
		casE	U00096.3:2879787-2881048		3.23269	4.43484	13.9031	21.6424	21.4148		0.456148	no		2.1046	yes		2.74305	yes		2.7278	yes
		cbdA	U00096.3:1037739-1039284		1.36734	2.69899	11.2191	9.08734	6.22069		0.981051	no		3.03652	yes		2.73249	yes		2.1857	yes
		cbdB	U00096.3:1039295-1040432		0.937359	1.58634	4.85892	5.31478	6.21155		0.759032	no		2.37396	yes		2.50334	yes		2.72828	yes
		cbl	U00096.3:2059963-2060914		1.7005	4.02488	19.8586	27.087	22.2611		1.24299	no		3.54573	yes		3.99357	yes		3.7105	yes
		cbrB	U00096.3:3897505-3897973		1.21809	3.2968	20.7147	22.8441	16.396		1.43645	no		4.08796	yes		4.22913	yes		3.75066	yes
		cbrC	U00096.3:3898021-3898609		8.68627	6.39108	38.7795	29.4576	36.1551		-0.442677	no		2.15848	yes		1.76183	yes		2.05739	yes
		chbC	U00096.3:1819855-1821214		1.85429	2.33618	10.3096	21.1354	23.6147		0.333279	no		2.47504	yes		3.51072	yes		3.67074	yes
		cheA	U00096.3:1973359-1975324		0.527094	0.825331	5.07594	6.35003	5.96383		0.646912	no		3.26754	yes		3.59063	yes		3.50011	yes
		cheY	U00096.3:1967047-1967437		3.31988	3.449	43.293	44.8214	40.2084		0.055048	no		3.70493	yes		3.75499	yes		3.5983	yes
		cheZ	U00096.3:1966392-1967037		2.12214	2.09547	17.8966	29.9343	25.1743		-0.018245	no		3.07609	yes		3.81821	yes		3.56836	yes
		chiA	U00096.3:3467159-3469853		1.82324	2.77794	7.39045	10.4731	11.0071		0.607511	no		2.01916	yes		2.52211	yes		2.59386	yes
		creD	U00096.3:4638177-4639530		0.760377	2.09962	4.89268	3.02263	2.43306		1.46534	no		2.68584	yes		1.99102	yes		1.67798	yes
		cynX	U00096.3:359991-361146		0.505994	0.628561	3.00643	2.17145	2.33764		0.312934	no		2.57086	yes		2.10147	no		2.20786	yes
		cysA	U00096.3:2539716-2543528		0.769713	2.96322	11.4444	14.3266	13.4352		1.94477	no		3.89418	yes		4.21823	yes		4.12556	yes
		cysD	U00096.3:2875420-2876329		0.874011	0.673107	4.75107	3.53336	5.78808		-0.376816	no		2.44253	yes		2.01532	yes		2.72736	yes
		cysN	U00096.3:2873386-2875419		0.879679	1.1898	6.50564	7.74106	6.67169		0.435668	no		2.88664	yes		3.13748	yes		2.923	yes
		dosP	U00096.3:1563333-1565733		0.503149	1.09579	2.28717	3.29257	2.83224		1.12291	no		2.18451	yes		2.71016	yes		2.49288	yes
		dsrB	U00096.3:2024634-2024823		107.922	94.3961	25.9264	33.1482	57.8102		-0.193195	no		-2.0575	yes		-1.70299	yes		-0.900599	no
		dtd	U00096.3:4075552-4078438		38.6025	77.1095	277.683	325.174	352.338		0.998216	no		2.84667	yes		3.07445	yes		3.19019	yes
		eutR	U00096.3:2554129-2555182		1.53819	3.63356	8.39548	5.16886	8.3144		1.24015	no		2.44838	yes		1.74861	yes		2.43438	yes
		exoX	U00096.3:1926119-1928839		16.3489	10.9207	3.39596	7.73097	8.09338		-0.582131	no		-2.2673	yes		-1.08047	no		-1.01438	no
		fimE	U00096.3:4542036-4542633		1.36423	2.72087	6.06606	8.52622	9.68073		0.99598	no		2.15267	yes		2.64382	yes		2.82703	yes
		fimG	U00096.3:4548284-4548788		0.768298	2.99563	4.70961	4.84072	6.86901		1.96312	no		2.61587	yes		2.65548	yes		3.16036	yes
		flgL	U00096.3:1140032-1140986		2.63468	3.84506	16.4478	17.4195	12.3934		0.545378	no		2.6422	yes		2.725	yes		2.23388	yes
		frvX	U00096.3:4088106-4092366		0.818031	1.78307	5.76601	5.59712	10.5194		1.12413	no		2.81735	yes		2.77446	yes		3.68475	yes
		fryA	U00096.3:2501989-2504485		0.384015	0.757488	3.88685	2.9859	3.33843		0.980061	no		3.33937	yes		2.95893	yes		3.11994	yes
		ftsA	U00096.3:103154-105244		67.3934	113.71	282.61	285.19	300.659		0.75468	no		2.06813	yes		2.08125	yes		2.15745	yes
		fumB	U00096.3:4345679-4347326		1.60203	2.50055	12.2215	9.84431	12.6882		0.642344	no		2.93145	yes		2.61939	yes		2.98552	yes
		garK	U00096.3:3270624-3271770		2.89877	3.77567	13.3827	19.917	18.5961		0.381294	no		2.20686	yes		2.78049	yes		2.68148	yes
		gatB	U00096.3:2174281-2174566		1954.72	1254.34	469.063	173.816	303.705		-0.640036	no		-2.05911	yes		-3.49133	yes		-2.68622	yes
		gatD	U00096.3:2171832-2172873		357.455	249.652	19.2786	6.26129	68.7867		-0.517845	no		-4.21269	yes		-5.83516	yes		-2.37756	yes
		gatR	U00096.3:2169692-2171727		10.3477	6.75408	2.24239	2.86163	5.90116		-0.61548	no		-2.2062	yes		-1.8544	no		-0.81024	no
		gcvP	U00096.3:3046167-3049041		36.0777	24.0339	5.83697	5.06096	15.1552		-0.58604	no		-2.62782	yes		-2.83362	yes		-1.25129	yes
		gfcD	U00096.3:1045848-1049332		0.513801	1.02556	2.2262	1.75464	2.1318		0.997136	no		2.1153	yes		1.7719	no		2.05279	no
		gfcE	U00096.3:1044229-1045803		1.58025	2.25628	7.74895	8.07466	7.01225		0.513792	no		2.29385	yes		2.35325	yes		2.14972	yes
		glcB	U00096.3:3121633-3123805		3.98351	6.4401	17.6282	21.3728	24.0985		0.693041	no		2.14577	yes		2.42366	yes		2.59683	yes
		gloA	U00096.3:1727836-1728244		42.1705	45.4675	8.50109	11.4404	12.5848		0.108603	no		-2.31051	yes		-1.8821	yes		-1.74455	yes
		glsA	U00096.3:511640-512573		1.36476	2.8187	12.0548	11.4816	12.8285		1.04638	no		3.14289	yes		3.0726	yes		3.23264	yes
		gnsA	U00096.3:1051846-1052240		489.435	394.375	121.219	47.4427	177.412		-0.311551	no		-2.01351	yes		-3.36686	yes		-1.46402	yes
		gsiB	U00096.3:869410-870949		4.93164	2.65258	0.90704	1.96527	2.63014		-0.894672	no		-2.44283	yes		-1.32734	yes		-0.906926	no
		gspE	U00096.3:3458338-3461013		0.408312	1.43799	3.94073	3.75386	4.43341		1.81631	no		3.27072	yes		3.20063	yes		3.44067	yes
		hcaD	U00096.3:2672046-2673249		0.468489	0.650115	2.69441	4.62714	2.49262		0.47268	no		2.52389	yes		3.30404	yes		2.41158	yes
		hofQ	U00096.3:3519464-3522751		0.714289	2.13156	3.60276	2.36819	5.48513		1.57733	no		2.33452	yes		1.7292	no		2.94095	yes
		hyfJ	U00096.3:2610163-2611870		1.63153	3.43679	18.3179	13.687	21.0382		1.07484	no		3.48896	yes		3.06851	no		3.68871	yes
		hyfR	U00096.3:2611899-2613912		0.610749	0.797582	2.79064	3.53263	2.23805		0.385053	no		2.19195	yes		2.53209	yes		1.87359	yes
		ilvA	U00096.3:3955330-3956875		2.3335	3.96418	11.6862	19.6811	11.7358		0.76453	no		2.32424	yes		3.07624	yes		2.33035	yes
		inaA	U00096.3:2348821-2349472		11.9992	11.4685	1.90765	3.43935	7.04843		-0.0652636	no		-2.65308	yes		-1.80273	yes		-0.767568	no
		kdpE	U00096.3:721055-724979		2.76179	4.6524	20.7112	17.7686	27.3865		0.752372	no		2.90673	yes		2.68565	yes		3.30979	yes
		livF	U00096.3:3592723-3593437		1.55943	1.99269	9.31425	11.3192	12.2484		0.353697	no		2.57842	yes		2.85968	yes		2.9735	yes
		livG	U00096.3:3593438-3596403		2.23179	2.49325	16.4346	21.38	13.3425		0.159829	no		2.88046	yes		3.25999	yes		2.57976	yes
		livJ	U00096.3:3598554-3599658		1.14871	1.21515	10.8861	15.8085	14.1024		0.0811097	no		3.2444	yes		3.7826	yes		3.61785	yes
		livK	U00096.3:3596450-3597560		1.1198	1.14236	5.32927	5.48472	4.89077		0.0287786	no		2.25069	yes		2.29217	yes		2.12682	yes
		livM	U00096.3:3593438-3596403		1.22086	1.18779	6.31948	4.71782	3.84236		-0.0396152	no		2.37191	yes		1.95022	yes		1.65409	no
		lpxM	U00096.3:1939221-1940193		20.7352	31.1894	111.644	127.387	114.447		0.58897	no		2.42875	yes		2.61906	yes		2.46453	yes
		metE	U00096.3:4013052-4015314		1.25524	1.77867	6.19426	5.71285	4.20563		0.502837	no		2.30297	yes		2.18625	yes		1.74436	yes
		mhpT	U00096.3:375458-376670		0.352605	0.54395	2.39421	3.76763	2.2897		0.625421	no		2.76342	yes		3.41753	yes		2.69903	yes
		motB	U00096.3:1975328-1977139		0.387665	0.37481	4.69345	3.73635	4.09269		-0.0486521	no		3.59776	yes		3.26875	no		3.40016	yes
		msrC	U00096.3:1915630-1916128		121.012	84.817	18.1198	23.9823	41.1789		-0.512727	no		-2.73951	yes		-2.33511	yes		-1.55518	yes
		nac	U00096.3:2061015-2061933		1.25241	1.93979	13.1253	13.1321	18.1064		0.6312	no		3.38957	yes		3.39032	yes		3.85372	yes
		ompA	U00096.3:1019012-1020053		1494.35	1448.29	177.186	102.16	72.3317		-0.0451679	no		-3.07618	yes		-3.87062	yes		-4.36875	yes
		ompC	U00096.3:2311645-2312749		1451.14	1511.79	85.985	22.7729	24.503		0.059073	no		-4.07696	yes		-5.99372	yes		-5.88808	yes
		ompX	U00096.3:850449-850965		542.751	615.007	122.542	64.6145	49.111		0.180312	no		-2.14702	yes		-3.07036	yes		-3.46617	yes
		pflD	U00096.3:4143994-4147136		0.989449	1.11374	6.58849	7.30886	5.56389		0.17072	no		2.73525	yes		2.88495	yes		2.4914	yes
		pphA	U00096.3:1922312-1922969		0.757042	1.26975	10.3689	12.7131	6.18273		0.746099	no		3.77575	yes		4.0698	yes		3.0298	yes
		proV	U00096.3:2804814-2807074		130.828	102.02	23.6406	15.0654	21.3282		-0.358815	no		-2.46834	yes		-3.11836	yes		-2.61684	yes
		rdlB	U00096.3:1269857-1269923		5007.65	3288.02	1162.94	2435.76	1525.61		-0.606913	no		-2.10635	yes		-1.03976	no		-1.71474	yes
		rdlC	U00096.3:1270392-1270460		4645.92	2882.53	603.694	2540.25	1352.06		-0.688628	no		-2.94408	yes		-0.870994	no		-1.78081	yes
		recB	U00096.3:2950634-2958884		7.23752	15.1209	156.448	159.548	182.859		1.06298	no		4.43404	yes		4.46235	yes		4.65909	yes
		rhmA	U00096.3:2358041-2358845		0.755612	0.349623	5.85591	7.62407	5.96191		-1.11184	no		2.95418	yes		3.33484	yes		2.98006	yes
		rhmT	U00096.3:2358862-2360152		0.283856	0.52431	3.9897	4.25065	2.09392		0.88526	no		3.81305	yes		3.90445	yes		2.88298	no
		rhsA	U00096.3:3762182-3766316		1.208	1.9037	7.55777	9.22661	12.2522		0.656188	no		2.64535	yes		2.93319	yes		3.34235	yes
		rhsC	U00096.3:729582-734102		1.27654	1.42809	5.39447	5.52185	7.49787		0.161846	no		2.07924	yes		2.11291	yes		2.55424	yes
		rhsD	U00096.3:523260-527541		0.889175	1.14041	4.02809	4.5647	3.01358		0.35901	no		2.17956	yes		2.35998	yes		1.76094	yes
		rhsE	U00096.3:1527901-1530404		0.671019	0.92466	3.02076	3.07716	2.90732		0.462569	no		2.17048	yes		2.19717	yes		2.11527	yes
		rhsJ	U00096.3:3767220-3768165		2.75587	5.20572	14.3087	23.8203	38.72		0.917591	no		2.37632	yes		3.11161	yes		3.8125	yes
		ribB	U00096.3:3183812-3184466		98.4125	134.437	17.0378	11.6069	5.66821		0.450018	no		-2.5301	yes		-3.08386	yes		-4.11788	yes
		rlmE	U00096.3:3327034-3327664		203.389	281.102	858.409	1099.12	542.677		0.46685	no		2.07742	yes		2.43403	yes		1.41585	yes
		rspB	U00096.3:1652895-1653915		1.18655	3.23026	12.5558	18.1642	16.3675		1.44488	no		3.40351	yes		3.93625	yes		3.78599	yes
		rtcB	U00096.3:3556852-3558079		1.23111	2.09851	5.18407	9.96889	6.4766		0.769401	no		2.07412	yes		3.01747	yes		2.39527	yes
		rttR	U00096.3:1287065-1287236		2584.95	3641.26	12205.2	8303.3	4551.93		0.494299	no		2.23928	yes		1.68355	yes		0.816338	yes
		sgcR	U00096.3:4526105-4526888		1.08051	0.312196	5.05738	2.09474	3.57395		-1.79119	no		2.22668	yes		0.955053	no		1.7258	yes
		smf	U00096.3:3431990-3433560		6.6463	10.0088	35.0648	38.0399	38.3917		0.590644	no		2.3994	yes		2.51689	yes		2.53017	yes
		torZ	U00096.3:1954577-1957007		1.31004	2.15807	22.0469	17.285	17.4234		0.720133	no		4.0729	yes		3.72184	yes		3.73334	yes
		tusC	U00096.3:3474972-3476440		19.5798	49.1992	162.099	170.524	146.02		1.32927	no		3.04944	yes		3.12254	yes		2.89873	yes
		tusD	U00096.3:3474972-3476440		20.8789	25.6077	97.1628	106.163	107.335		0.294532	no		2.21836	yes		2.34617	yes		2.36201	yes
		ulaG	U00096.3:4418560-4419625		3.27089	1.50684	0.688608	1.85233	1.36719		-1.11816	no		-2.24793	yes		-0.820343	no		-1.25847	no
		xylB	U00096.3:3727916-3729371		2.12241	1.76152	12.9106	13.5186	10.2046		-0.268879	no		2.60478	yes		2.67118	yes		2.26544	yes
		xylH	U00096.3:3732200-3734901		1.16392	1.57501	10.2534	11.7747	10.1759		0.436375	no		3.13904	yes		3.33863	yes		3.1281	yes
		yaaU	U00096.3:45806-47138		0.402382	0.283664	2.13671	1.78167	1.94458		-0.504383	no		2.40875	yes		2.14659	no		2.27282	no
		yaaW	U00096.3:10642-11356		1.23869	1.33142	5.45002	6.51313	6.9826		0.104149	no		2.13744	yes		2.39453	yes		2.49495	yes
		yahO	U00096.3:346483-346759		20.386	39.1798	92.5239	114.248	109.413		0.94253	no		2.18224	yes		2.48652	yes		2.42413	yes
		yaiC	U00096.3:403702-404818		0.369954	1.24915	5.16277	4.86271	2.36889		1.75552	no		3.80273	yes		3.71634	yes		2.67879	no
		ybdR	U00096.3:642087-643326		0.544212	0.658453	3.23741	4.06536	2.37073		0.274911	no		2.5726	yes		2.90114	yes		2.12309	no
		ybhJ	U00096.3:803502-805764		0.649906	1.49806	14.3199	40.3463	55.7234		1.2048	no		4.46164	yes		5.95606	yes		6.42191	yes
		ycjG	U00096.3:1388929-1390598		5.02567	8.00105	24.4418	27.5578	39.9952		0.670872	no		2.28196	yes		2.45507	yes		2.99244	yes
		ycjY	U00096.3:1390867-1391853		0.789641	0.845276	7.84817	9.36329	7.52984		0.0982261	no		3.31309	yes		3.56775	yes		3.25335	yes
		ydaU	U00096.3:1421118-1421976		0.81711	0.555686	4.85141	4.84744	8.2157		-0.55626	no		2.5698	yes		2.56862	yes		3.32978	yes
		ydaV	U00096.3:1421982-1423200		1.80777	2.53632	8.3258	9.6097	15.0569		0.48852	no		2.20337	yes		2.41028	yes		3.05814	yes
		yddG	U00096.3:1546287-1547169		6.89934	5.30512	1.67329	1.92737	3.15579		-0.379074	no		-2.04377	yes		-1.83983	yes		-1.12846	yes
		yddH	U00096.3:1533051-1533851		2.02744	3.88367	16.097	21.953	22.7012		0.937765	no		2.98906	yes		3.43669	yes		3.48504	yes
		ydeM	U00096.3:1579632-1580790		0.611761	0.88817	9.72802	10.6239	14.9982		0.537868	no		3.99111	yes		4.1182	yes		4.61567	yes
		ydjG	U00096.3:1854990-1855971		1.91307	3.34383	8.26205	14.3649	12.1045		0.805614	no		2.11061	yes		2.90859	yes		2.66158	yes
		yedS	U00096.3:2034050-2035243		0.473151	1.30186	2.90554	4.80269	4.44393		1.4602	no		2.61843	yes		3.34347	yes		3.23146	yes
		yeeE	U00096.3:2084466-2085525		0.995486	1.39055	4.94593	7.41441	5.76054		0.482178	no		2.31277	yes		2.89686	yes		2.53273	yes
		yegU	U00096.3:2178820-2182781		2.63306	1.39648	16.0222	23.4903	27.3603		-0.914946	no		2.60526	yes		3.15725	yes		3.37727	yes
		yegV	U00096.3:2178820-2182781		4.68379	6.71968	26.1969	30.6348	41.8374		0.520716	no		2.48365	yes		2.70942	yes		3.15904	yes
		yegZ	U00096.3:2167601-2167814		11.6149	19.1883	92.5577	72.0685	76.7129		0.724251	no		2.99438	yes		2.6334	yes		2.7235	yes
		yehI	U00096.3:2200278-2203911		0.644602	2.16682	9.16529	10.854	11.8965		1.7491	no		3.8297	yes		4.07368	yes		4.20599	yes
		yehM	U00096.3:2205694-2211100		0.302354	0.485665	2.30955	2.96791	3.10849		0.683724	no		2.9333	yes		3.29513	yes		3.3619	yes
		yehQ	U00096.3:2205694-2211100		0.206419	0.298314	2.41116	1.88997	1.54525		0.531252	no		3.54608	yes		3.19471	no		2.90419	no
		yfaQ	U00096.3:2328147-2329797		0.379534	0.866005	3.75447	4.43979	2.3843		1.19015	no		3.30631	yes		3.54819	yes		2.65126	yes
		yfcU	U00096.3:2452355-2455001		0.512977	0.886883	2.1929	3.77259	3.58878		0.789851	no		2.09587	yes		2.87859	yes		2.80653	yes
		yfdQ	U00096.3:2474031-2474856		0.834614	0.219203	10.2984	9.76002	8.07918		-1.92884	no		3.62516	yes		3.5477	yes		3.27503	yes
		yfjS	U00096.3:2770444-2771124		1.56808	3.69452	31.8459	45.371	46.0608		1.23639	no		4.34404	yes		4.8547	yes		4.87647	yes
		yfjT	U00096.3:2771147-2771615		1.61423	2.91999	20.8654	35.5296	29.5636		0.855114	no		3.69219	yes		4.4601	yes		4.1949	yes
		ygcE	U00096.3:2901895-2903374		1.15404	1.39466	5.79544	7.05076	6.57264		0.273224	no		2.32823	yes		2.61109	yes		2.50979	yes
		yghA	U00096.3:3149661-3150546		0.619717	0.974118	6.00265	5.58396	6.76308		0.652487	no		3.27592	yes		3.17161	yes		3.448	yes
		yhdE	U00096.3:3396325-3398378		37.682	83.9346	348.695	291.404	318.608		1.15539	no		3.21002	yes		2.95107	yes		3.07983	yes
		yhdP	U00096.3:3392457-3396258		8.05713	9.18874	41.5341	41.9611	39.6292		0.1896	no		2.36596	yes		2.38072	yes		2.29823	yes
		yhdX	U00096.3:3420133-3421315		0.484659	0.691874	5.62041	4.60354	5.10034		0.513538	no		3.53563	yes		3.2477	yes		3.39555	yes
		yhdY	U00096.3:3421324-3422428		0.544376	0.38135	2.53295	2.94829	3.98067		-0.513489	no		2.21814	yes		2.4372	yes		2.87033	yes
		yhfA	U00096.3:3485413-3485818		37.3388	23.8707	7.4784	7.87156	16.0707		-0.645433	no		-2.31987	yes		-2.24595	yes		-1.21624	yes
		yhhM	U00096.3:3605250-3605610		19.916	15.9604	3.80768	5.32567	14.0337		-0.319431	no		-2.38694	yes		-1.90289	yes		-0.505036	no
		yhiI	U00096.3:3625678-3630602		29.9305	15.1316	6.11662	8.08635	9.91312		-0.984055	no		-2.29081	yes		-1.88806	yes		-1.59421	yes
		yhiJ	U00096.3:3630967-3632590		0.36702	1.36259	3.36203	3.34092	3.4887		1.89242	no		3.1954	yes		3.18632	yes		3.24876	yes
		yhjH (pdeH)	U00096.3:3678419-3679187		0.35472	0.481534	2.5118	3.69611	2.43524		0.440956	no		2.82397	yes		3.38125	yes		2.77931	no
		yibA	U00096.3:3766336-3767179		5.21501	9.64459	48.826	69.8522	85.0753		0.887049	no		3.22691	yes		3.74356	yes		4.028	yes
		yibI	U00096.3:3771381-3771744		2.49938	1.84753	22.7759	10.6455	13.5552		-0.435975	no		3.18786	yes		2.0906	yes		2.4392	yes
		yidJ	U00096.3:3856910-3860116		1.14213	0.759615	4.63506	4.44483	4.39134		-0.588385	no		2.02086	yes		1.9604	yes		1.94294	yes
		yieL	U00096.3:3899407-3900577		0.942185	0.889608	3.77362	9.60076	6.93283		-0.0828397	no		2.00187	yes		3.34907	yes		2.87936	yes
		yihO	U00096.3:4064362-4065766		0.398239	0.204657	2.16895	3.00883	1.82853		-0.960427	no		2.44529	yes		2.91749	yes		2.19897	no
		yihS	U00096.3:4070514-4071756		0.821784	0.963012	9.4985	10.8281	8.43328		0.228796	no		3.53087	yes		3.71988	yes		3.35926	yes
		yiiD	U00096.3:4075552-4078438		20.9283	32.2093	162.298	163.796	155.386		0.622017	no		2.95511	yes		2.96837	yes		2.89233	yes
		yjaZ	U00096.3:4189785-4190325		5.99497	12.3043	40.4583	34.2131	24.005		1.03734	no		2.75461	yes		2.51272	yes		2.00151	yes
		yjgN	U00096.3:4479729-4480926		1.02594	1.7472	4.74752	5.15383	2.57698		0.768103	no		2.21024	yes		2.32871	yes		1.32874	no
		yjjU	U00096.3:4612410-4614260		9.17428	4.73348	2.19452	4.15533	2.91409		-0.954693	no		-2.06369	yes		-1.14263	yes		-1.65455	yes
		ykfC	U00096.3:272846-273954		1.63098	2.96291	7.6381	10.3624	10.4156		0.861279	no		2.22747	yes		2.66755	yes		2.67494	yes
		ymcE	U00096.3:1051846-1052240		177.356	140.549	39.722	36.9512	59.5417		-0.335576	no		-2.15864	yes		-2.26295	yes		-1.57468	yes
		ymgG	U00096.3:1222643-1222988		2.57026	2.65474	24.6661	34.83	24.3283		0.0466593	no		3.26254	yes		3.76035	yes		3.24265	yes
		yneJ	U00096.3:1614803-1615685		5.31031	2.81718	1.1185	1.32968	2.13124		-0.914545	no		-2.24723	yes		-1.99771	yes		-1.3171	yes
		yneO	U00096.3:1592664-1597987		1.00741	1.86644	7.64156	10.8811	13.6381		0.889633	no		2.92321	yes		3.43309	yes		3.75892	yes
		ynfF	U00096.3:1660555-1662979		1.16076	1.50224	4.74185	5.84499	5.42518		0.372055	no		2.03039	yes		2.33214	yes		2.22461	yes
		yoeG	U00096.3:2067359-2067892		8.33408	12.1561	52.452	55.1371	80.2294		0.544582	no		2.6539	yes		2.72593	yes		3.26704	yes
		yphC	U00096.3:2674699-2675761		1.34264	2.34339	8.74778	6.35307	6.13908		0.803526	no		2.70385	yes		2.24239	yes		2.19295	yes
		yqeA	U00096.3:3011460-3012393		3.51488	5.54593	34.0388	42.3103	39.6369		0.657953	no		3.27563	yes		3.58946	yes		3.4953	yes
		yqiJ	U00096.3:3192207-3192837		0.735775	2.32073	14.6464	16.2181	9.84209		1.65724	no		4.31514	yes		4.4622	yes		3.74163	yes
		yraK	U00096.3:3291340-3292432		0.988507	1.34343	3.98465	3.51905	3.40343		0.442597	no		2.01113	yes		1.83186	yes		1.78367	yes
		zraS	U00096.3:4201925-4205931		2.62222	3.30325	12.8309	13.2035	15.8998		0.333096	no		2.29076	yes		2.33206	yes		2.60014	yes
	Transient expression	dadA	U00096.3:1237570-1238869		100.486	29.1826	20.3144	27.4803	106.01		-1.78382	yes		-2.30643	yes		-1.87053	yes		0.0771934	no
		dadX	U00096.3:1238878-1239949		73.8078	21.6661	11.6866	16.9501	68.1021		-1.76833	yes		-2.65891	yes		-2.12248	yes		-0.116073	no
		gcvH	U00096.3:3049159-3049549		301.692	335.88	49.8704	32.6059	100.132		0.154868	no		-2.59682	yes		-3.20987	yes		-1.59117	yes
		glpK	U00096.3:4115713-4117222		281.098	74.8864	47.452	67.5449	289.79		-1.9083	yes		-2.56653	yes		-2.05715	yes		0.0439344	no
		glpQ	U00096.3:2349934-2351011		496.644	142.366	48.4924	54.8374	313.786		-1.80261	yes		-3.35638	yes		-3.17898	yes		-0.662433	no
		gltA	U00096.3:753184-754468		293.245	76.8446	48.4549	86.2617	250.628		-1.93209	yes		-2.59739	yes		-1.76531	yes		-0.226558	no
		malT	U00096.3:3553084-3555790		19.6128	5.10886	4.28583	6.17198	18.3795		-1.94072	yes		-2.19415	yes		-1.66799	yes		-0.0936961	no
		nanA	U00096.3:3372682-3373576		188.356	62.5911	16.9329	13.4721	124.302		-1.58943	yes		-3.47556	yes		-3.80541	yes		-0.599613	no
		sdhA	U00096.3:755176-757673		196.248	64.6185	45.2996	97.8798	241.6		-1.60266	yes		-2.11511	yes		-1.0036	yes		0.299941	no
		sdhB	U00096.3:757688-758405		205.492	82.7191	47.2237	96.347	274.718		-1.31279	yes		-2.1215	yes		-1.09277	yes		0.418872	no
		srlR	U00096.3:2829046-2832289		36.9837	13.4889	6.30889	7.38771	20.6856		-1.45512	yes		-2.55143	yes		-2.32369	yes		-0.838264	no
		treC	U00096.3:4463053-4464709		210.484	57.0638	16.1578	22.5553	135.425		-1.88306	yes		-3.70341	yes		-3.22217	yes		-0.636213	no
		ugd	U00096.3:2098446-2099613		3.7498	5.87637	16.7663	8.28485	5.18227		0.648113	no		2.16068	yes		1.14366	yes		0.466771	no
		ybbJ	U00096.3:514400-515773		11.3596	13.7515	51.932	36.9382	28.8976		0.275678	no		2.19271	yes		1.7012	yes		1.34704	no
		yehT	U00096.3:2212242-2214644		19.0376	7.82111	4.38023	7.1508	11.8947		-1.28341	yes		-2.11977	yes		-1.41267	yes		-0.678535	no
		yehU	U00096.3:2212242-2214644		8.64485	4.44413	2.15803	3.12702	7.37664		-0.959938	no		-2.00213	yes		-1.46705	yes		-0.228876	no
		yeiQ	U00096.3:2266244-2267711		5.72919	1.45614	1.00135	3.2323	9.72763		-1.97618	yes		-2.51638	yes		-0.82577	no		0.763757	no
		yeiQ	U00096.3:2266244-2267711		5.72919	1.45614	1.00135	3.2323	9.72763		-1.97618	yes		-2.51638	yes		-0.82577	no		0.763757	no
		yhcH	U00096.3:3369013-3371036		68.139	25.035	14.397	14.5136	67.7748		-1.44453	yes		-2.24271	yes		-2.23107	yes		-0.00773326	no
	RNA patterns follow the path of change observed in the time laps t5-0 and reach the imposed threshold by t10	aceB	U00096.3:4215477-4217079		50.1438	18.2847	9.90702	8.02619	28.213		-1.45543	yes		-2.33955	yes		-2.64328	yes		-0.829713	yes
		alaS	U00096.3:2819380-2822011		125.63	283.137	894.659	806.303	654.47		1.17233	yes		2.83216	yes		2.68215	yes		2.38115	yes
		alr	U00096.3:4265781-4266861		9.78717	22.9417	91.3835	94.3998	98.3674		1.22901	yes		3.22297	yes		3.26982	yes		3.32922	yes
		alsR	U00096.3:4312100-4312991		20.2386	7.54445	4.56358	4.46639	5.43764		-1.42362	yes		-2.14888	yes		-2.17993	yes		-1.89606	yes
		ansB	U00096.3:3099681-3100728		19.5629	35.9302	422.477	380.158	225.252		0.877076	yes		4.43268	yes		4.28041	yes		3.52535	yes
		bcsC	U00096.3:3685699-3690261		1.22848	2.78749	6.49439	8.10769	8.42733		1.18209	yes		2.40232	yes		2.72241	yes		2.7782	yes
		cdaR	U00096.3:182462-183620		6.86279	14.1824	107.385	151.571	121.409		1.04724	yes		3.96785	yes		4.46506	yes		4.14494	yes
		cdd	U00096.3:2231843-2232728		112.735	35.2835	15.124	15.3836	34.9555		-1.67587	yes		-2.89803	yes		-2.87347	yes		-1.68935	yes
		csrA	U00096.3:2818960-2819146		3343.81	6183.43	34176.5	26382.5	17276.4		0.886915	yes		3.35344	yes		2.98002	yes		2.36924	yes
		cysI	U00096.3:2888386-2891898		0.990323	2.56615	12.1508	12.6936	13.9995		1.37363	yes		3.617	yes		3.68005	yes		3.82134	yes
		cytR	U00096.3:4123430-4124456		71.7249	20.3948	8.34422	11.7423	37.9856		-1.81427	yes		-3.10362	yes		-2.61076	yes		-0.917022	yes
		deoA	U00096.3:4618228-4619551		64.4608	21.5376	10.9179	8.5781	16.1428		-1.58156	yes		-2.56173	yes		-2.90969	yes		-1.99754	yes
		deoC	U00096.3:4617322-4618102		132.616	39.2955	25.7745	17.7121	39.0161		-1.75482	yes		-2.36324	yes		-2.90445	yes		-1.76511	yes
		dhaK	U00096.3:1249767-1250838		48.1948	13.3983	4.77659	10.442	24.7723		-1.84683	yes		-3.33483	yes		-2.20647	yes		-0.960151	yes
		dhaL	U00096.3:1249124-1249757		105.328	31.6821	21.2423	14.6916	45.7388		-1.73314	yes		-2.30987	yes		-2.84183	yes		-1.20339	yes
		dhaM	U00096.3:1247695-1249114		56.8938	18.1562	14.1742	15.1799	31.8225		-1.64781	yes		-2.005	yes		-1.90611	yes		-0.838226	yes
		djlA	U00096.3:57363-58179		12.9802	39.2837	222.535	215.831	194.648		1.59762	yes		4.09965	yes		4.05552	yes		3.90648	yes
		dusB	U00096.3:3410279-3411245		118.532	365.464	549.324	404.391	278.776		1.62445	yes		2.21238	yes		1.77047	yes		1.23383	yes
		fabR	U00096.3:4161123-4162130		126.591	266.004	826.248	890.859	934.448		1.07128	yes		2.7064	yes		2.81503	yes		2.88394	yes
		fadD	U00096.3:1888060-1889746		7.17767	26.3594	199.505	270.933	190.914		1.87673	yes		4.79677	yes		5.23827	yes		4.73327	yes
		feoA	U00096.3:3540162-3540390		185.374	46.6814	36.7103	24.3864	38.8088		-1.98952	yes		-2.33618	yes		-2.92629	yes		-2.25598	yes
		fhuA	U00096.3:167483-169727		20.6362	9.05239	3.86129	2.33453	1.62542		-1.18881	yes		-2.41802	yes		-3.14398	yes		-3.66629	yes
		fhuF	U00096.3:4604874-4605663		27.7103	9.42588	6.65853	3.15026	3.26047		-1.55572	yes		-2.05715	yes		-3.13688	yes		-3.08727	yes
		fimB	U00096.3:4540956-4541559		48.7412	16.6333	5.53338	3.05158	6.29074		-1.55107	yes		-3.13891	yes		-3.99751	yes		-2.95384	yes
		fis	U00096.3:3411270-3411567		328.491	1003.94	1606.98	1567.06	1083.33		1.61175	yes		2.29042	yes		2.25413	yes		1.72155	yes
		flgK	U00096.3:1138377-1140021		1.38397	3.03488	7.85819	8.28525	5.25261		1.13283	yes		2.50539	yes		2.58174	yes		1.92422	yes
		fliC	U00096.3:2002109-2003606		5.03061	14.3617	108.417	135.946	112.456		1.51342	yes		4.42971	yes		4.75616	yes		4.48248	yes
		focA	U00096.3:953608-954466		68.0196	19.2852	12.9659	12.4935	11.1422		-1.81846	yes		-2.39123	yes		-2.44477	yes		-2.60991	yes
		frdA	U00096.3:4379782-4382318		32.7134	8.90978	7.49333	6.314	11.5733		-1.87642	yes		-2.1262	yes		-2.37325	yes		-1.49908	yes
		frdB	U00096.3:4379782-4382318		60.3634	18.3229	13.9486	11.112	18.3394		-1.72002	yes		-2.11355	yes		-2.44156	yes		-1.71873	yes
		ftsZ	U00096.3:105304-106456		98.7837	189.407	769.331	668.465	699.696		0.939148	yes		2.96126	yes		2.75851	yes		2.82438	yes
		garR	U00096.3:3271866-3272751		1.89776	4.62583	13.4761	19.1242	23.3056		1.28541	yes		2.82803	yes		3.33303	yes		3.61831	yes
		gatY	U00096.3:2176349-2177204		779.077	217.283	54.6869	69.7121	361.697		-1.84219	yes		-3.8325	yes		-3.48228	yes		-1.10698	yes
		gatZ	U00096.3:2175058-2176321		723.732	386.275	164.016	70.8505	252.479		-0.905827	yes		-2.14162	yes		-3.35261	yes		-1.51929	yes
		gcvT	U00096.3:3049572-3050667		84.6645	34.9013	9.19259	11.9409	40.8914		-1.27847	yes		-3.20321	yes		-2.82585	yes		-1.04996	yes
		glk	U00096.3:2508460-2509426		69.434	23.3891	13.8213	11.5661	17.7382		-1.56981	yes		-2.32875	yes		-2.58574	yes		-1.96878	yes
		glnA	U00096.3:4056624-4058034		135.006	81.3962	32.1942	28.0177	48.682		-0.729994	yes		-2.06815	yes		-2.26862	yes		-1.47157	yes
		gntK	U00096.3:3577064-3577592		9.98805	2.55646	1.91989	0.372093	1.99906		-1.96605	yes		-2.37918	yes		-4.74647	no		-2.32088	yes
		grcA	U00096.3:2716065-2716449		892.393	243.756	136.117	69.2808	16.2059		-1.87224	yes		-2.71283	yes		-3.68715	yes		-5.78309	yes
		hisS	U00096.3:2639300-2640575		57.6802	121.821	322.724	280.04	204.055		1.07861	yes		2.48415	yes		2.27948	yes		1.82281	yes
		ibpA	U00096.3:3867008-3867422		701.173	191.064	157.627	494.188	241.052		-1.87572	yes		-2.15325	yes		-0.504709	no		-1.54043	yes
		ibpB	U00096.3:3866468-3866897		179.477	81.4564	39.7759	178.791	83.1079		-1.1397	yes		-2.17383	yes		-0.00552526	no		-1.11074	yes
		ileX	U00096.3:3215597-3215673		12996.3	33759.1	62361.4	21732	23901.1		1.37717	yes		2.26255	yes		0.74172	yes		0.878973	yes
		ilvY	U00096.3:3956926-3957820		11.7208	5.72943	2.75548	3.92155	3.7885		-1.03261	yes		-2.0887	yes		-1.57958	yes		-1.62938	yes
		insG	U00096.3:4502102-4503431		6.93592	26.8499	75.423	80.6464	105.274		1.95276	yes		3.44285	yes		3.53945	yes		3.92391	yes
		kdpD	U00096.3:721055-724979		2.53668	4.98188	23.6972	25.1562	33.5463		0.97375	yes		3.2237	yes		3.3099	yes		3.72514	yes
		malE	U00096.3:4245228-4246419		383.917	125.609	35.0909	7.51663	6.97699		-1.61185	yes		-3.45163	yes		-5.67456	yes		-5.78204	yes
		malI	U00096.3:1698151-1699180		3.02788	6.2408	48.1131	47.1635	40.1997		1.04342	yes		3.99005	yes		3.96129	yes		3.73081	yes
		malM	U00096.3:4249553-4250474		121.425	44.3105	13.8845	11.2921	11.5004		-1.45434	yes		-3.12852	yes		-3.42668	yes		-3.40031	yes
		manX	U00096.3:1902047-1903019		65.5616	27.4022	9.96181	10.3784	25.007		-1.25856	yes		-2.71837	yes		-2.65927	yes		-1.39052	yes
		mreB	U00096.3:3400043-3401087		80.0074	300.104	1294.18	1537.98	1480.78		1.90726	yes		4.01576	yes		4.26476	yes		4.21008	yes
		mreD	U00096.3:3398386-3399978		33.8142	109.653	468.645	492.249	377.299		1.69724	yes		3.79279	yes		3.86369	yes		3.48001	yes
		nrdD	U00096.3:4460521-4462660		17.7833	5.99147	2.70798	2.72897	11.8631		-1.56954	yes		-2.71523	yes		-2.70409	yes		-0.584037	no
		nupC	U00096.3:2513041-2514244		102.04	41.0207	13.3505	19.9417	35.8408		-1.31472	yes		-2.93418	yes		-2.35528	yes		-1.50947	yes
		ompF	U00096.3:985893-986982		455.591	163.564	16.9761	6.06258	4.98161		-1.47788	yes		-4.74616	yes		-6.23166	yes		-6.51498	yes
		ompW	U00096.3:1314019-1314658		31.5673	10.663	3.47074	1.49653	3.42358		-1.56582	yes		-3.18512	yes		-4.39874	yes		-3.20486	yes
		pka	U00096.3:2719952-2722613		6.57528	2.85818	1.44757	2.30517	4.75139		-1.20195	yes		-2.18342	yes		-1.51218	yes		-0.468701	no
		pqiB	U00096.3:1013258-1015459		7.66463	21.2118	156.343	200.606	171.874		1.46858	yes		4.35035	yes		4.71	yes		4.48699	yes
		pqiC	U00096.3:1013258-1015459		14.4833	42.1921	363.697	427.582	389.524		1.54258	yes		4.65028	yes		4.88374	yes		4.74925	yes
		purC	U00096.3:2596904-2597618		6.44802	15.867	108.376	126.842	128.475		1.2991	yes		4.07105	yes		4.29804	yes		4.31649	yes
		putA	U00096.3:1074919-1078882		28.8059	10.4942	4.62687	5.40981	15.8614		-1.45677	yes		-2.63826	yes		-2.41271	yes		-0.86084	yes
		rbsD	U00096.3:3933350-3933770		325.816	117.606	77.6688	45.3376	103.279		-1.4701	yes		-2.06865	yes		-2.84528	yes		-1.65751	yes
		rbsK	U00096.3:3937293-3938223		44.4971	13.0969	8.39435	6.98162	16.0088		-1.76448	yes		-2.40622	yes		-2.67208	yes		-1.47485	yes
		rihC	U00096.3:27292-28207		37.7318	16.6857	9.3562	7.69179	13.6074		-1.17717	yes		-2.01178	yes		-2.29439	yes		-1.47139	yes
		rnd	U00096.3:1886863-1887991		7.46779	17.7004	65.1234	69.6338	43.9142		1.24503	yes		3.12442	yes		3.22103	yes		2.55593	yes
		rng	U00096.3:3396325-3398378		23.0508	44.6701	173.467	181.079	166.516		0.954491	yes		2.91177	yes		2.97373	yes		2.85277	yes
		rnpA	U00096.3:3884492-3885073		105.129	303.775	432.747	352.485	283.462		1.53085	yes		2.04137	yes		1.74541	yes		1.431	no
		rpoB	U00096.3:4181244-4185273		144.862	289.926	677.477	572.603	440.019		1.00101	yes		2.22549	yes		1.98285	yes		1.60289	yes
		rsd	U00096.3:4196331-4196808		48.891	12.887	4.76809	12.0392	27.4527		-1.92365	yes		-3.35809	yes		-2.02182	yes		-0.832623	yes
		sibB	U00096.3:2153643-2153779		4584.27	2160.79	296.978	945.69	825.881		-1.08513	yes		-3.94826	yes		-2.27725	yes		-2.47269	yes
		srlE	U00096.3:2825831-2827351		136.44	50.174	22.018	13.2638	48.2635		-1.44326	yes		-2.63151	yes		-3.36271	yes		-1.49927	yes
		tatD	U00096.3:4023553-4024821		5.27421	15.5307	42.1776	45.4681	49.6244		1.55809	yes		2.99945	yes		3.10783	yes		3.23402	yes
		tdcD	U00096.3:3262451-3263660		2.99763	0.902868	0.350471	0.921362	1.96169		-1.73123	yes		-3.09645	yes		-1.70198	yes		-0.611726	no
		tktB	U00096.3:2579635-2581639		3.29673	8.99357	14.5884	9.82028	9.86503		1.44786	yes		2.14572	yes		1.57473	yes		1.58129	yes
		tolA	U00096.3:776341-777607		30.6104	110.844	376.071	308.053	280.62		1.85644	yes		3.61891	yes		3.33108	yes		3.19652	yes
		tolB	U00096.3:777739-779032		132.023	225.677	776.089	912.187	698.777		0.773469	yes		2.55543	yes		2.78854	yes		2.40404	yes
		tolQ	U00096.3:774751-775845		18.2701	54.7121	126.094	174.168	221.84		1.58237	yes		2.78695	yes		3.25292	yes		3.60196	yes
		tolR	U00096.3:775848-776277		31.0603	109.372	344.482	360.251	330.512		1.8161	yes		3.47129	yes		3.53586	yes		3.41156	yes
		torY	U00096.3:1957031-1958132		0.91343	3.10667	14.5684	14.6339	14.7014		1.766	yes		3.9954	yes		4.00188	yes		4.00852	yes
		tsx	U00096.3:431128-432013		965.909	271.227	18.9823	26.1308	50.4513		-1.83239	yes		-5.66916	yes		-5.20807	yes		-4.25892	yes
		ucpA	U00096.3:2543831-2544623		137.451	39.8339	23.3198	17.1127	52.8643		-1.78685	yes		-2.55929	yes		-3.00578	yes		-1.37855	yes
		udp	U00096.3:4016430-4017192		519.85	198.781	95.7638	75.0405	130.188		-1.38692	yes		-2.44054	yes		-2.79236	yes		-1.9975	yes
		uup	U00096.3:1009963-1011871		9.77161	36.9831	74.0486	88.4362	87.021		1.9202	yes		2.9218	yes		3.17797	yes		3.1547	yes
		wecG	U00096.3:3979955-3980696		8.43931	17.1848	33.8644	15.9238	17.7838		1.02593	yes		2.00457	yes		0.915987	yes		1.07537	yes
		yabP	U00096.3:58473-59279		12.3099	27.1511	139.266	162.849	145.479		1.1412	yes		3.49996	yes		3.72565	yes		3.56292	yes
		yagU	U00096.3:302990-303605		44.9155	18.6923	11.0002	9.62314	7.48732		-1.26477	yes		-2.02969	yes		-2.22263	yes		-2.58469	yes
		ybeL	U00096.3:675017-675500		42.7021	16.9521	9.53149	10.8398	12.7363		-1.33284	yes		-2.16353	yes		-1.97797	yes		-1.74536	yes
		ycbK	U00096.3:983074-983623		53.0457	170.954	745.759	1037.87	1987.68		1.6883	yes		3.8134	yes		4.29025	yes		5.22771	yes
		ycbL	U00096.3:983649-984297		58.5803	120.146	657.855	914.024	1582.31		1.0363	yes		3.48928	yes		3.96374	yes		4.75547	yes
		ycgH	U00096.3:1219600-1222248		0.988036	2.30085	10.6436	11.8165	11.0514		1.21953	yes		3.42928	yes		3.58009	yes		3.48352	yes
		yciI	U00096.3:1310568-1310865		73.2845	32.7697	11.0639	10.7612	18.8229		-1.16115	yes		-2.72764	yes		-2.76767	yes		-1.96102	yes
		yegD	U00096.3:2147673-2149026		2.83925	7.24673	17.8081	12.5175	8.49073		1.35182	yes		2.64895	yes		2.14036	yes		1.58038	yes
		yfcF	U00096.3:2419840-2420485		4.40315	10.5908	57.1809	51.4894	47.7352		1.2662	yes		3.69893	yes		3.54767	yes		3.43845	yes
		yffS	U00096.3:2564522-2565332		31.1234	16.3668	7.29372	6.2829	12.1203		-0.927226	yes		-2.09327	yes		-2.3085	yes		-1.36057	yes
		yggM	U00096.3:3098557-3099565		0.657819	1.45697	8.34155	9.41147	5.1593		1.14721	no		3.66455	yes		3.83866	yes		2.97141	yes
		ygjR	U00096.3:3237310-3238297		15.258	4.91927	3.4729	4.53688	5.67683		-1.63305	yes		-2.13535	yes		-1.74979	yes		-1.42641	yes
		yhjD	U00096.3:3673361-3674375		8.39926	2.8211	1.39725	2.08424	2.86647		-1.57401	yes		-2.58767	yes		-2.01074	yes		-1.55099	yes
		yibT	U00096.3:3776170-3776380		317.128	96.6608	53.5929	26.2581	93.5402		-1.71406	yes		-2.56495	yes		-3.59423	yes		-1.76141	yes
		yifB	U00096.3:3948448-3949969		1.05704	2.78004	11.0654	9.27091	10.8346		1.39507	yes		3.38794	yes		3.13268	yes		3.35754	yes
		yifN	U00096.3:3960011-3960460		15.1229	4.2463	3.45881	2.93589	3.63216		-1.83246	yes		-2.12839	yes		-2.36486	yes		-2.05784	yes
		yoeH	U00096.3:2068260-2068419		501.054	1220.95	2551.07	2322.84	3698.39		1.28497	yes		2.34806	yes		2.21285	yes		2.88386	yes

## Sheet: RNA Change t15
	RNA pattern & comments	CDS (synonyms)	locus		x_t0	x_t5	x_t10	x_t15	x_t20		r_t5	s_t5		r_t10	s_t10		r_t15	s_t15		r_t20	s_t20
	Significant change only after t10	aaeB	U00096.3:3386220-3388188		0.624515	1.42672	2.02702	2.50849	2.09288		1.19189	no		1.69855	no		2.00601	yes		1.74468	no
		araF	U00096.3:1985138-1986128		1.38237	0.824695	3.30736	6.1678	6.75056		-0.745209	no		1.25854	no		2.15762	yes		2.28787	yes
		arsC	U00096.3:3650236-3650662		2.37672	1.17155	4.78053	9.74781	8.48398		-1.02055	no		1.0082	no		2.03611	yes		1.83577	no
		bioA	U00096.3:807967-809257		0.499114	0.586414	1.94457	3.11118	2.92983		0.232549	no		1.96201	no		2.64002	yes		2.55337	yes
		cheW	U00096.3:1972835-1973339		2.60373	2.30202	5.4401	13.5623	11.9975		-0.177676	no		1.06306	no		2.38096	yes		2.20409	yes
		citT	U00096.3:645116-646580		0.642529	0.679394	2.14529	3.39398	1.89658		0.0804869	no		1.73934	no		2.40114	yes		1.56157	no
		cusB	U00096.3:597478-598702		0.540132	0.923042	1.59182	2.31082	1.81288		0.773084	no		1.55929	no		2.09702	yes		1.7469	no
		fhuC	U00096.3:169777-173444		9.5702	4.32803	3.37878	1.89456	1.47191		-1.14484	no		-1.50204	no		-2.33668	yes		-2.70086	yes
		flgC	U00096.3:1131437-1131842		13.0332	14.0763	10.7072	1.85874	4.2026		0.111074	no		-0.283608	no		-2.8098	yes		-1.63284	no
		gabP	U00096.3:2794252-2795653		0.458304	0.500053	0.998268	2.50652	1.91613		0.125776	no		1.12312	no		2.45131	yes		2.06382	no
		gadC	U00096.3:1568953-1570489		0.418991	0.837149	1.56293	2.50034	1.26742		0.998565	no		1.89926	no		2.57714	yes		1.59691	no
		garL	U00096.3:3272786-3273557		1.09126	0.632743	2.80976	7.94248	7.04093		-0.786297	no		1.36446	no		2.8636	yes		2.68978	yes
		glcG	U00096.3:3123826-3124231		3.00818	2.40014	9.92276	20.0905	12.6947		-0.325775	no		1.72185	no		2.73955	yes		2.07726	yes
		hslO	U00096.3:3529773-3530652		51.2449	62.566	50.7542	234.173	230.572		0.287971	no		-0.0138809	no		2.1921	yes		2.16974	yes
		idnD	U00096.3:4493374-4494406		2.52993	1.66275	4.11543	19.2221	28.5949		-0.605527	no		0.701946	no		2.92559	yes		3.49859	yes
		kdpA	U00096.3:727058-728821		0.692665	1.01681	1.78049	12.9844	13.7985		0.553818	no		1.36204	no		4.22848	yes		4.31621	yes
		lsrA	U00096.3:1601489-1605039		0.802026	0.37349	2.48671	3.45406	4.35952		-1.10258	no		1.63252	no		2.10657	yes		2.44245	yes
		lsrB	U00096.3:1605050-1606073		1.08697	0.600004	3.2229	5.86993	7.46078		-0.857265	no		1.56805	no		2.43303	yes		2.77902	yes
		mgrR	U00096.3:1622816-1622914		105451	142447	92490.6	26044.6	25877.1		0.433845	no		-0.189198	no		-2.01752	yes		-2.02683	yes
		mutM	U00096.3:3810342-3811152		22.2001	28.1258	28.7845	95.272	77.6165		0.341329	no		0.374725	no		2.10149	yes		1.8058	yes
		panM	U00096.3:3597983-3598367		20.6218	10.8187	10.9099	4.95019	9.86881		-0.930639	no		-0.918537	no		-2.05862	yes		-1.06323	no
		potF	U00096.3:893783-894896		0.611207	1.52887	2.2385	4.1576	5.01212		1.32274	no		1.8728	no		2.76602	yes		3.03569	yes
		rsmJ	U00096.3:3642379-3643132		9.42948	15.6793	13.883	42.6257	42.6538		0.733612	no		0.558066	no		2.17647	yes		2.17742	yes
		setC	U00096.3:3836952-3838137		0.428506	0.520914	0.943861	3.32256	3.42995		0.281731	no		1.13926	no		2.95491	yes		3.0008	yes
		sgcE	U00096.3:4526904-4527537		1.1653	1.09225	4.57258	5.84283	6.19931		-0.0933959	no		1.97231	no		2.32597	yes		2.41141	yes
		srlB	U00096.3:2827361-2827733		250.674	245.758	200.361	62.0141	80.8457		-0.0285768	no		-0.323209	no		-2.01515	yes		-1.63257	yes
		yahI	U00096.3:340164-341115		0.297263	0.366391	0.961949	2.1683	3.14815		0.301648	no		1.69422	no		2.86675	yes		3.40469	yes
		ybhG	U00096.3:826118-830643		10.8859	5.15877	3.63299	1.60097	4.6028		-1.07735	no		-1.58323	no		-2.76544	yes		-1.24187	no
		ycjF	U00096.3:1384116-1386572		8.81179	7.05981	7.13138	43.3414	36.4114		-0.319806	no		-0.305253	no		2.29824	yes		2.04688	yes
		ydcS	U00096.3:1511653-1512799		0.55171	0.408608	1.74294	2.84862	2.51834		-0.433193	no		1.65954	no		2.36828	yes		2.19049	yes
		ydfI	U00096.3:1629452-1630913		0.610106	0.44454	1.55413	3.25207	2.91756		-0.456748	no		1.34897	no		2.41423	yes		2.25763	yes
		ydiR	U00096.3:1780400-1781339		0.665126	0.44949	1.90655	3.3823	1.97228		-0.565337	no		1.51926	no		2.3463	yes		1.56817	no
		yeeD	U00096.3:2084225-2084453		17.5769	25.5694	43.9187	111.599	76.1765		0.540735	no		1.32115	no		2.66658	yes		2.11566	yes
		yfdE	U00096.3:2488022-2489168		0.330636	0.331339	0.614574	4.75243	4.08306		0.00306569	no		0.894343	no		3.84535	yes		3.62634	yes
		ygbT	U00096.3:2878854-2879772		3.65589	2.79783	7.56041	16.7058	15.8007		-0.385913	no		1.04824	no		2.19206	yes		2.11169	yes
		yhjB	U00096.3:3671291-3671894		1.72959	1.01765	4.07018	8.05088	5.3234		-0.765184	no		1.23466	no		2.21872	yes		1.62192	no
		yjhF	U00096.3:4520670-4522020		0.409061	0.292921	1.25865	2.68011	1.72471		-0.481806	no		1.62149	no		2.71191	yes		2.07596	no
		ymfD	U00096.3:1196866-1197532		7.70801	7.04896	4.34555	0.59573	9.43669		-0.128949	no		-0.826821	no		-3.69363	yes		0.291922	no
		yphD	U00096.3:2675826-2676825		0.469431	0.496129	1.57429	3.1932	1.73337		0.0798037	no		1.74571	no		2.76602	yes		1.8846	no
	Transient expression	fxsA	U00096.3:4368663-4369140		80.8599	32.4638	105.088	445.402	247.482		-1.31659	yes		0.378104	no		2.46161	yes		1.61382	yes
	RNA patterns follow the path of change observed in he time laps t10-5 and reach the imposed threshold by t15	proW	U00096.3:2804814-2807074		107.023	108.82	31.773	13.5012	22.4102		0.0240208	no		-1.75205	yes		-2.98677	yes		-2.25569	yes
		gatC	U00096.3:2172920-2174278		469.454	435.684	217.893	65.8978	113.971		-0.107701	no		-1.10736	yes		-2.83268	yes		-2.04232	yes
		yqjH	U00096.3:3215726-3216491		6.41165	2.9515	2.40199	0.901919	1.55655		-1.11925	no		-1.41647	yes		-2.82963	yes		-2.04235	yes
		dsdA	U00096.3:2479201-2480530		65.2402	49.2137	25.5081	9.19037	36.1137		-0.4067	no		-1.35481	yes		-2.82757	yes		-0.853213	yes
		manY	U00096.3:1903081-1903882		105.698	68.0024	29.6037	17.6646	37.4098		-0.636289	no		-1.8361	yes		-2.58102	yes		-1.49846	yes
		mgsA	U00096.3:1026556-1027015		50.5756	33.5304	15.6138	9.47229	25.8128		-0.592971	no		-1.69562	yes		-2.41666	yes		-0.970351	yes
		yibF	U00096.3:3761346-3761955		10.963	7.25214	3.46529	2.06444	4.52309		-0.596168	no		-1.6616	yes		-2.40882	yes		-1.27727	yes
		nrdE	U00096.3:2800722-2803492		4.56366	2.39895	1.41358	0.879243	1.21852		-0.927788	no		-1.69084	yes		-2.37586	yes		-1.90506	yes
		yhbW	U00096.3:3303447-3304455		16.7869	11.2261	6.09298	3.48487	3.2676		-0.580471	no		-1.46211	yes		-2.26816	yes		-2.36103	yes
		yhhX	U00096.3:3579767-3580805		23.8629	17.5048	10.096	5.00046	4.47067		-0.447015	no		-1.24098	yes		-2.25463	yes		-2.4162	yes
		manZ	U00096.3:1903894-1904746		110.974	70.3166	42.2347	23.6118	49.8416		-0.65828	no		-1.39372	yes		-2.23264	yes		-1.1548	yes
		rbsB	U00096.3:3936277-3937168		547.345	337.442	238.508	119.411	121.716		-0.69781	no		-1.19841	yes		-2.19652	yes		-2.16894	yes
		ydfG	U00096.3:1627516-1628263		63.716	55.4981	35.7391	14.0778	23.2943		-0.199218	no		-0.834154	yes		-2.17823	yes		-1.45168	yes
		ybfA	U00096.3:729133-729340		181.506	136.519	52.9416	40.8238	35.0432		-0.410919	no		-1.77754	yes		-2.15253	yes		-2.37281	yes
		thrC	U00096.3:3733-5020		40.7536	46.6807	14.1926	9.26801	11.8798		0.195901	no		-1.52178	yes		-2.1366	yes		-1.77842	yes
		yfbT	U00096.3:2411438-2412089		44.695	38.1359	26.1337	10.3117	17.5092		-0.228964	no		-0.774203	yes		-2.11583	yes		-1.352	yes
		ygiN	U00096.3:3173141-3173456		87.5811	92.9285	46.8224	20.5818	25.8954		0.0855009	no		-0.903421	yes		-2.08925	yes		-1.75792	yes
		yjbR	U00096.3:4270657-4271014		55.1581	32.4499	15.7535	13.3433	22.302		-0.765358	no		-1.8079	yes		-2.04746	yes		-1.3064	yes
		rbbA	U00096.3:3625678-3630602		14.5633	9.00252	4.52057	3.62472	3.60231		-0.693935	no		-1.68776	yes		-2.00639	yes		-2.01534	yes
		wcaM	U00096.3:2114501-2115896		1.90198	1.93867	6.01592	7.69359	7.11455		0.027567	no		1.66129	yes		2.01616	yes		1.90327	yes
		ybgF	U00096.3:779597-780389		146.575	170.673	454.951	594.707	490.597		0.219594	no		1.63407	yes		2.02054	yes		1.7429	yes
		fixB	U00096.3:43187-44129		0.999051	0.778495	3.73686	4.05426	5.06925		-0.359872	no		1.9032	yes		2.02081	yes		2.34314	yes
		secA	U00096.3:108278-110984		66.7714	68.157	150.256	274.443	266.256		0.0296322	no		1.17012	yes		2.0392	yes		1.99551	yes
		rhsO	U00096.3:734132-736219		1.23629	0.950902	3.73643	5.10681	8.71302		-0.378651	no		1.59564	yes		2.0464	yes		2.81715	yes
		ycbU	U00096.3:1002888-1003431		2.61855	2.03253	10.3355	10.8911	8.28		-0.365487	no		1.98077	yes		2.05632	yes		1.66087	yes
		rpoC	U00096.3:4185349-4189573		177.208	241.872	596.919	741.554	555.211		0.448799	no		1.75209	yes		2.06511	yes		1.64759	yes
		yheO	U00096.3:3474972-3476440		35.2024	37.4461	118.732	148.736	110.875		0.0891456	no		1.75396	yes		2.07901	yes		1.65519	yes
		pgaC	U00096.3:1086520-1089857		1.09999	2.39207	3.30351	4.75608	3.06036		1.12077	no		1.58651	yes		2.11228	yes		1.47621	no
		recR	U00096.3:494075-495010		27.827	35.5351	100.15	120.904	104.281		0.352758	no		1.84761	yes		2.1193	yes		1.90592	yes
		ldcC	U00096.3:209678-211820		2.44409	4.40494	5.90998	10.7508	8.7134		0.849826	no		1.27386	yes		2.13708	yes		1.83394	yes
		glxR	U00096.3:536585-537464		1.0108	1.42811	3.93817	4.83697	4.18484		0.498609	no		1.96203	yes		2.25861	yes		2.04968	yes
		tldD	U00096.3:3390582-3392028		23.5449	23.0643	86.842	115.382	88.4684		-0.0297531	no		1.88298	yes		2.29293	yes		1.90975	yes
		yfdC	U00096.3:2465300-2466233		1.67527	3.12731	6.37246	8.39675	8.40166		0.900526	no		1.92745	yes		2.32543	yes		2.32628	yes
		apaG	U00096.3:51228-51606		110.83	134.643	387.797	568.015	552.557		0.280794	no		1.80696	yes		2.35759	yes		2.31778	yes
		clpP	U00096.3:456676-457300		314.102	420.879	1063.08	1630.07	1533.43		0.422171	no		1.75895	yes		2.37563	yes		2.28745	yes
		ygbF	U00096.3:2878568-2878853		18.597	16.8758	49.3362	100.323	92.3801		-0.140109	no		1.40758	yes		2.43151	yes		2.31251	yes
		cysH	U00096.3:2887577-2888312		1.51836	0.989665	5.80808	8.2695	3.72482		-0.617505	no		1.93555	yes		2.44528	yes		1.29465	no
		fdhF	U00096.3:4297218-4299366		2.48118	4.16479	7.52027	14.0161	9.71621		0.747216	no		1.59976	yes		2.49798	yes		1.96937	yes
		satP	U00096.3:9927-10494		2.66575	5.4898	7.76292	15.1547	10.4646		1.04221	no		1.54206	yes		2.50715	yes		1.9729	yes
		rclA	U00096.3:318675-320001		0.961881	1.68631	3.84679	5.6003	4.04208		0.809939	no		1.99972	yes		2.54157	yes		2.07117	yes
		hslR	U00096.3:3529347-3529749		135.658	156.263	262.852	853.111	623.493		0.204	no		0.954277	yes		2.65276	yes		2.2004	yes
		leuB	U00096.3:80866-83529		1.79051	1.3567	6.99067	11.4298	10.3159		-0.400268	no		1.96506	yes		2.67436	yes		2.52642	yes
		yibH	U00096.3:3770242-3771379		1.19454	1.85413	4.4278	7.98314	5.79281		0.634287	no		1.89013	yes		2.7405	yes		2.27781	yes
		yieK	U00096.3:3898670-3899393		2.27255	2.39387	7.70994	15.6798	15.6808		0.0750335	no		1.76241	yes		2.78652	yes		2.78661	yes
		rtcA	U00096.3:3555832-3556849		1.1829	2.30704	4.14523	8.2341	5.93755		0.963716	no		1.80912	yes		2.79928	yes		2.32754	yes
		idnO	U00096.3:4492586-4493351		2.11872	2.51621	5.74597	18.2671	38.4047		0.248057	no		1.43936	yes		3.10798	yes		4.18002	yes
		kdpB	U00096.3:724987-727036		1.146	1.54151	2.46735	12.7612	20.3492		0.42773	no		1.10635	yes		3.47708	yes		4.15029	yes
	RNA patterns follow the path of change observed in the time laps t5-0 and reach the imposed threshold by t15	agp	U00096.3:1065584-1066826		20.6402	7.83866	7.73355	4.6818	8.81226		-1.39678	yes		-1.41625	yes		-2.14032	yes		-1.22787	yes
		alx	U00096.3:3238579-3239545		1.39486	4.2918	5.24672	6.93311	5.07936		1.62146	yes		1.91129	yes		2.31338	yes		1.86453	yes
		blr	U00096.3:1704550-1704676		559.517	169.473	146.101	132.445	179.356		-1.72313	yes		-1.93722	yes		-2.07879	yes		-1.64136	yes
		galE	U00096.3:791038-792055		26.4706	11.7031	10.558	6.55564	11.6536		-1.1775	yes		-1.32606	yes		-2.01358	yes		-1.18362	yes
		galP	U00096.3:3088283-3089678		18.8791	7.20821	5.79282	4.36709	6.22582		-1.38908	yes		-1.70445	yes		-2.11205	yes		-1.60046	yes
		gatA	U00096.3:2174596-2175049		831.57	498.719	221.423	52.8176	245.113		-0.737612	yes		-1.90903	yes		-3.97675	yes		-1.76239	yes
		hybO	U00096.3:3145142-3146261		12.5745	5.41371	3.49146	2.96337	7.00866		-1.21581	yes		-1.8486	yes		-2.08519	yes		-0.843289	yes
		intS	U00096.3:2466544-2467702		12.805	3.69733	3.36644	3.11762	4.10172		-1.79216	yes		-1.92741	yes		-2.03819	yes		-1.64241	yes
		pck	U00096.3:3532817-3534440		136.225	70.924	38.2344	31.7572	37.9886		-0.941646	yes		-1.83305	yes		-2.10083	yes		-1.84235	yes
		ubiA	U00096.3:4253015-4253888		25.3647	13.972	7.1139	4.91032	6.19128		-0.860282	yes		-1.83411	yes		-2.36893	yes		-2.03451	yes
		ung	U00096.3:2716753-2717443		29.3734	11.4262	7.50802	4.50891	5.0778		-1.36216	yes		-1.96801	yes		-2.70366	yes		-2.53223	yes
		uspA	U00096.3:3640110-3640545		630.178	324.142	207.839	84.29	113.148		-0.959133	yes		-1.6003	yes		-2.90233	yes		-2.47755	yes
		ygdH	U00096.3:2926307-2927672		46.1898	23.3105	13.8723	9.02439	15.1364		-0.986597	yes		-1.73537	yes		-2.35567	yes		-1.60955	yes
		yicH	U00096.3:3830456-3832166		21.5566	8.78831	5.72536	4.6976	5.58778		-1.29447	yes		-1.91269	yes		-2.19813	yes		-1.94778	yes
		yobD	U00096.3:1904800-1905259		21.7157	10.8504	11.6505	3.35676	8.75401		-1.00099	yes		-0.89834	no		-2.69359	yes		-1.31072	yes

## Sheet: RNA Change t20
	RNA pattern & comments	CDS (synonyms)	locus		x_t0	x_t5	x_t10	x_t15	x_t20		r_t5	s_t5		r_t10	s_t10		r_t15	s_t15		r_t20	s_t20
	Low levels. Significant change only after t15	chbB	U00096.3:1821298-1821619		6.19014	6.58363	8.52072	19.5199	27.9819		0.088911	no		0.461004	no		1.6569	no		2.17645	yes
		dosC	U00096.3:1565757-1567140		0.69787	1.63287	1.02132	1.5997	2.9292		1.22638	no		0.549409	no		1.19677	no		2.06948	yes
		dppB	U00096.3:3704770-3705790		1.02611	0.257687	0.919983	1.74477	4.19546		-1.99349	no		-0.157502	no		0.765859	no		2.03165	yes
		elbB	U00096.3:3348451-3350459		39.2424	36.1381	20.5287	10.9863	8.72631		-0.118893	no		-0.934768	no		-1.83671	no		-2.16897	yes
		glcC	U00096.3:3128271-3129036		4.09678	2.47412	4.57064	6.57718	18.3141		-0.727573	no		0.157908	no		0.68298	no		2.1604	yes
		ulaC	U00096.3:4421707-4422172		1.90741	2.11021	1.60123	3.38507	9.72227		0.145767	no		-0.25244	no		0.827567	no		2.34968	yes
		ydjJ	U00096.3:1857789-1858833		0.882262	0.600435	1.91175	2.18995	4.87832		-0.555198	no		1.11561	no		1.31162	no		2.46711	yes
		yfiH	U00096.3:2734302-2736011		15.7074	14.5586	5.31765	4.05613	3.81068		-0.109574	no		-1.56258	no		-1.95327	no		-2.04333	yes
		yicG	U00096.3:3818873-3821170		16.3536	12.3945	4.69646	7.20645	3.11677		-0.399907	no		-1.79996	no		-1.18225	no		-2.39148	yes
		yjhP	U00096.3:4532436-4533183		1.12309	0.449584	2.23596	2.82373	5.52905		-1.32081	no		0.993424	no		1.33013	no		2.29956	yes
		yjhR	U00096.3:4534790-4536031		1.01124	1.53774	2.14733	2.71615	4.31873		0.604684	no		1.08641	no		1.42543	no		2.09448	yes
	Transient expression	ndh	U00096.3:1166084-1167389		22.9259	45.0815	25.3083	7.34463	2.81814		0.975556	yes		0.142628	no		-1.64222	yes		-3.02416	yes
		yhcN	U00096.3:3385537-3385801		40.2444	121.15	73.0917	49.4858	6.01455		1.58994	yes		0.860919	no		0.298227	no		-2.74226	yes
	RNA patterns follow the path of change observed between t10-t15 and reach the imposed threshold by t20	abgR	U00096.3:1404740-1405649		5.18797	3.41027	6.79046	15.7665	44.0658		-0.605283	no		0.388338	no		1.60362	yes		3.08642	yes
		fecA	U00096.3:4514352-4516677		33.5792	28.0279	35.7468	14.5965	8.32664		-0.260704	no		0.0902477	no		-1.20194	yes		-2.01176	yes
		glxK	U00096.3:541887-543033		1.0758	1.49911	3.07974	3.91484	4.64187		0.478704	no		1.5174	no		1.86355	yes		2.1093	yes
		idnT	U00096.3:4491205-4492525		2.57121	1.02892	2.97231	6.28614	10.4974		-1.32132	no		0.209134	no		1.28973	yes		2.02951	yes
		lit	U00096.3:1198694-1199588		6.09541	5.53716	3.62788	2.83093	1.27821		-0.138577	no		-0.748598	no		-1.10645	yes		-2.2536	yes
		msyB	U00096.3:1113806-1114181		30.4567	34.1479	40.4271	9.15796	6.66802		0.165035	no		0.408563	no		-1.73366	yes		-2.19143	yes
		osmE	U00096.3:1821917-1822256		29.8151	34.524	15.7828	7.81657	7.39245		0.211554	no		-0.917693	no		-1.93144	yes		-2.01192	yes
		pdxK	U00096.3:2536385-2537237		32.669	34.7019	27.2872	14.0384	7.80485		0.08709	no		-0.259699	no		-1.21855	yes		-2.06548	yes
		proX	U00096.3:2807131-2808124		194.4	227.855	124.901	51.2321	42.5422		0.229093	no		-0.638235	no		-1.9239	yes		-2.19206	yes
		puuA	U00096.3:1359489-1360908		1.10745	1.61917	2.54894	4.18849	6.14353		0.548007	no		1.20265	no		1.91918	yes		2.47182	yes
		ugpB	U00096.3:3591008-3592325		0.980663	0.356534	1.31621	3.79784	5.92193		-1.45972	no		0.424565	no		1.95335	yes		2.59424	yes
		xylG	U00096.3:3732200-3734901		1.29537	0.723921	3.82467	4.35414	5.23862		-0.839458	no		1.56197	no		1.74902	yes		2.01582	yes
		ybjP	U00096.3:903951-904467		45.5252	38.9036	35.0412	11.904	9.9532		-0.226761	no		-0.377612	no		-1.93522	yes		-2.19343	yes
		ydiB	U00096.3:1773788-1774655		1.28517	1.22239	2.8817	4.93017	5.81958		-0.0722539	no		1.16496	no		1.93968	yes		2.17896	yes
		ydjH	U00096.3:1855980-1856928		1.84933	1.99874	3.35269	6.06178	7.96536		0.112092	no		0.858317	no		1.71274	yes		2.10674	yes
		ydjI	U00096.3:1856932-1857769		1.72081	2.00768	2.9937	5.53645	9.52623		0.222447	no		0.798842	no		1.68588	yes		2.46882	yes
	RNA patterns follow the path of change observed in the time laps t10-5 and reach the imposed threshold by t20	chbA	U00096.3:1819454-1819805		18.0739	16.4855	51.5047	59.4543	86.6826		-0.132712	no		1.5108	yes		1.71788	yes		2.26184	yes
		chbF	U00096.3:1817147-1818500		1.20602	0.727969	2.95383	3.82348	9.57575		-0.728307	no		1.29233	yes		1.66463	yes		2.98913	yes
		chbR	U00096.3:1818604-1819447		2.9041	2.25525	9.39931	11.3301	22.9472		-0.364802	no		1.69446	yes		1.964	yes		2.98216	yes
		csiR	U00096.3:2795673-2796336		3.23812	4.73428	9.39942	10.343	15.6909		0.547991	no		1.53742	yes		1.67543	yes		2.2767	yes
		dgkA	U00096.3:4256636-4257005		40.0743	26.8376	10.4071	10.2393	2.52499		-0.578423	no		-1.94511	yes		-1.96856	yes		-3.98833	yes
		exbB	U00096.3:3151249-3151984		70.6933	54.8118	33.2034	24.9316	14.5688		-0.367087	no		-1.09024	yes		-1.5036	yes		-2.27869	yes
		exbD	U00096.3:3150817-3151243		83.7032	67.6199	47.8271	38.1344	19.612		-0.307834	no		-0.807454	yes		-1.13419	yes		-2.09354	yes
		fadI	U00096.3:2457014-2460469		4.83455	3.68015	18.4205	18.5133	19.6877		-0.393615	no		1.92986	yes		1.93711	yes		2.02584	yes
		gspD	U00096.3:3455577-3458329		0.884391	1.42768	3.19628	3.3801	4.09679		0.690917	no		1.85364	yes		1.93431	yes		2.21174	yes
		insF1	U00096.3:2169692-2171727		9.3326	12.5901	26.671	35.1049	39.4973		0.431939	no		1.51492	yes		1.91132	yes		2.0814	yes
		manA	U00096.3:1688575-1689751		37.7099	35.3487	20.4027	10.2749	8.88894		-0.0932849	no		-0.886184	yes		-1.87582	yes		-2.08486	yes
		mhpR	U00096.3:367586-368420		6.95612	2.90412	4.24991	10.2068	28.9573		-1.26018	yes		-0.710849	no		0.553177	no		2.05757	yes
		nrdA	U00096.3:2344864-2347150		42.0728	52.1037	15.1247	12.9038	8.63445		0.308499	no		-1.47598	yes		-1.70509	yes		-2.28471	yes
		poxB	U00096.3:909330-911049		2.29212	2.97708	5.55665	8.45522	10.1517		0.377216	no		1.27753	yes		1.88316	yes		2.14697	yes
		rdlD	U00096.3:3700135-3700201		5023.14	8893.79	1540.45	1897.3	1104.15		0.824209	no		-1.70524	yes		-1.40464	yes		-2.18566	yes
		sibD	U00096.3:3194722-3194865		9107.34	8497.65	4288.14	2585.1	1643.93		-0.0999665	no		-1.08668	yes		-1.81681	yes		-2.46988	yes
		sodA	U00096.3:4100809-4101430		359.432	316.353	198.224	98.8657	60.656		-0.184184	no		-0.858587	yes		-1.86218	yes		-2.567	yes
		uspG	U00096.3:641438-641867		100.995	61.301	63.5672	27.0233	13.5354		-0.720297	yes		-0.667923	no		-1.902	yes		-2.89947	yes
		wecH	U00096.3:3725886-3726882		1.43469	2.46181	4.78996	4.55028	6.06011		0.778978	no		1.73927	yes		1.66521	yes		2.0786	yes
		xdhD	U00096.3:3020539-3024186		2.79131	2.908	8.81932	10.0818	12.0046		0.0590848	no		1.65972	yes		1.85274	yes		2.10457	yes
		xylA	U00096.3:3729442-3730765		1.77581	1.53478	4.16343	6.5956	7.49927		-0.210447	no		1.22929	yes		1.89302	yes		2.07827	yes
		xylF	U00096.3:3731130-3732123		2.44586	1.16883	7.52394	6.42619	13.5154		-1.06528	no		1.62115	yes		1.39362	yes		2.46619	yes
		yadC	U00096.3:149714-150953		1.14592	1.56167	3.63066	3.86254	5.41894		0.446587	no		1.66373	yes		1.75305	yes		2.24151	yes
		ydcI	U00096.3:1494147-1495071		16.3116	13.5186	44.5063	56.0421	88.8701		-0.270957	no		1.44811	yes		1.78061	yes		2.4458	yes
		yeeX	U00096.3:2079031-2079361		276.031	226.272	103.363	95.6153	64.5719		-0.286776	no		-1.41712	yes		-1.52952	yes		-2.09585	yes
		yfcZ	U00096.3:2460649-2460934		73.3197	52.5803	31.1806	50.3754	11.5185		-0.479678	no		-1.23355	yes		-0.54148	no		-2.67025	yes
		yigF	U00096.3:4002418-4002799		24.3253	17.9667	8.17604	6.32136	4.76513		-0.437128	no		-1.57298	yes		-1.94415	yes		-2.35187	yes
		yiiG	U00096.3:4087001-4088057		0.866981	1.05898	2.66032	3.02915	4.2163		0.288601	no		1.61753	yes		1.80484	yes		2.2819	yes
		ymgD	U00096.3:1222304-1222634		10.5247	8.89617	29.9536	33.6145	43.4185		-0.242521	no		1.50895	yes		1.67531	yes		2.04453	yes
		yrbL	U00096.3:3348451-3350459		164.211	93.8289	41.4511	46.6994	29.5471		-0.807445	no		-1.98607	yes		-1.81407	yes		-2.47446	yes
	RNA patterns follow the path of change observed in the time laps t5-0	leuL	U00096.3:83621-83708		2259.18	918.725	914.35	807.954	445.259		-1.29809	yes		-1.30498	yes		-1.48345	yes		-2.34308	yes
		pepE	U00096.3:4229452-4230142		21.2995	10.2627	5.42991	6.17737	5.00075		-1.05341	yes		-1.97182	yes		-1.78576	yes		-2.09061	yes
		yfcC	U00096.3:2417080-2418601		2.80666	0.823323	1.12415	1.07104	0.64006		-1.76932	yes		-1.32002	yes		-1.38984	yes		-2.13258	yes
