# Supplementary material
Source: HighWire-hosted journal article supplement (doi:10.1101/rna.073288.119)
Supplement: Supplemental_Table_S5_A_and_R_values_statistics.xlsx [file Supplemental_Table_S5_A_and_R_values_statistics.xlsx]

## Sheet: Legend
	Table S5. R and A values measured at each 5' RNA end during the course of the experiment
	Column name	Description
	EcoCyc	The term 'EcoCyc' signifies that the nucleotide is reported or predicted at EcoCyc as TSS. When the nucleotide reported in the database is not mapped by tags, a variation of 5 nucleotides was allowed. By doing so, we allocated 581 tagged RNA ends, that we assigned as 342 TSSs, 222 UNDs and 17 PSSs, respectively. Note that among coordinates commented, tagging confirm numerous predictions at EcoCyc…
	Coordinate	Nucleotide on the K12 chromosome (GenBank:AE016830.1 E coli :U00096.3 genome)
	CDS (synonymous)	DNA portion transcribed encoding for a protein or a non-protein encoding RNA
	Strand	Transcription orientation of the CDS
	Tag strand	Orientation of the tag
	RNA end	Nature of the RNA end assigned. 'TSS': Transcription start site; 'PSS': Processing site; 'UND': Undetermined without additional consideration criteria
	R0	tagging-rate at the origine of the kinetic (t0)
	R5	tagging-rate during the kinetic interval t5 and t0 (t5-0)
	R10	tagging-rate during the kinetic interval t10 and t5 (t10-5)
	R15	tagging-rate during the kinetic interval t15 and t10 (t15-10)
	R20	tagging-rate during the kinetic interval t20 and t15 (t20-15)
	∆Ri	Standard deviation associated with tagging rate Ri
	pRi	Rate p-value for aggregated counts using Fisher's method
	A0	tagging-acceleration at the origine of the kinetic (t0)
	A5	tagging-acceleration during the kinetic interval t5 and t0 (t5-0)
	A10	tagging-acceleration during the kinetic interval t10 and t5 (t10-5)
	A15	tagging-acceleration during the kinetic interval t15 and t10 (t15-10)
	A20	tagging-acceleration during the kinetic interval t20 and t15 (t20-15)
	∆Ai	Standard deviation associated with acceleration Ai
	pAi	Acceleration p-value for aggregated rate p-values using Fisher's method
		First significant difference between A values occurs in the kinetic interval t5-0
		First significant difference between A values occurs in the kinetic interval t10-5
		First significant difference between A values occurs in the kinetic interval t15-10
		First significant difference between A values occurs in the kinetic interval t20-15

## Sheet: R values
					tagging-rate during 5 min intervals
Coordinate	CDS (synonymous)	Strand	Tag strand	RNA end	R0	R5	∆R5	pR5	R10	∆R10	pR10	R15	∆R15	pR15	R20	∆R20	pR20
146			+	TSS	0	-0.333333	0.966918	1.45091e-05	-0.2	0.683135	1.18293e-07	-0.266667	1.64581	2.78983e-06	0.866667	0.945163	1.0052e-11
147			+	TSS	0	-0.333333	0.529153	0.000180553	-0.0666667	0.673333	0.00664894	6.21725e-16	0.816497	0.000458096	-0.133333	0.692823	0.000686149
148			+	TSS	0	-23.5667	17.7695	1.56308e-15	-5.56667	6.92122	7.00444e-13	3.53333	2.99555	9.41153e-16	2.76667	1.68819	2.95539e-14
149			+	TSS	0	-0.8	0.972968	0.0371832	-0.133333	0.653197	0.000340492	0	0.163299	0.00115805	0	0.258199	0.00161767
190	thrL	+
255	\thrL	\+
337	thrA	+
2799	\thrA	\+
2801	thrB	+
3733	\thrB	\+
3734	thrC	+
5020	\thrC	\+
5234	yaaX	+
5530	\yaaX	\+
5683	yaaA	-
6459	\yaaA	\-
6529	yaaJ	-
7959	\yaaJ	\-
8191			+	TSS	0	-13.1	12.544	2.58604e-17	-6.33333	3.43753	6.07808e-15	0.266667	1.62896	2.5392e-14	0.133333	1.52753	8.47539e-15
8192			+	TSS	0	-0.266667	1.29615	4.13792e-07	-0.8	0.774597	0.00108197	0.4	0.516398	2.13158e-06	-0.266667	0.489898	9.47979e-07
8198			+	PSS	0	1.4	7.87774	1.64222e-09	-5.93333	5.88558	3.85559e-06	-0.0666667	2.66827	3.42217e-07	0.8	3.72877	5.77831e-06
8199			+	PSS	0	0.133333	1.15475	0.00766137	-0.266667	1.14395	8.99371e-05	0.2	0.653197	0.000158342	-0.533333	0.711852	0.0304056
8238	talB	+
8638			+	PSS	0	5.32907e-16	0.683135	5.64237e-05	-0.8	0.632456	0.117268	-0.0666667	0.2	0.824606	0.333333	0.2	2.72335e-05
9191	\talB	\+
9277			+	TSS	0	-1.26667	2.16641	1.19836e-12	-1.2	0.577353	0.00133326	0.266667	0.565685	0.0156976	0.133333	0.621825	5.18996e-06
9306	mog	+
9893	\mog	\+
9928	satP	-
10494	\satP	\-
10643	yaaW	-
11356	\yaaW	\-
11382	yaaI	-
11786	\yaaI	\-
12046			+	TSS	0	-0.6	0.673333	9.94283e-06	-1.24345e-15	0.355546	6.80747e-06	1.06667	0.916515	1.07992e-09	0.266667	1.7733	2.76402e-10
12047			+	TSS	0	-0.666667	0.846347	0.000193845	-0.666667	0.416333	1	3.2	2.36643	1	-0.133333	2.78328	1.73904e-13
12048			+	TSS	0	-24.8667	31.6323	2.30075e-16	-13.6	14.5153	8.26373e-16	59.0667	25.5878	1.9003e-19	20.1333	5.37315	1.14463e-19
12049			+	TSS	0	-1.33333	1.65738	6.97341e-09	-0.4	0.588785	0.000171101	2.26667	1.95445	1.16567e-08	2.26667	2.72294	8.92325e-11
12121			+	TSS	0	-1.66667	3.45877	1.58805e-12	-0.466667	1.28582	2.80393e-13	4.2	2.8775	1.14842e-15	0.133333	4.24892	5.76213e-15
12122			+	UND	0	-1.2	1.85113	2.2485e-07	0	0.99332	3.85775e-10	3	1.22746	7.47137e-15	-0.666667	2.36798	1.86178e-13
12123			+	UND	0	-7	11.3824	1.9607e-15	0.133333	3.12197	3.45551e-16	12.6667	3.48527	5.52169e-18	1.86667	11.1796	1.34197e-17
12124			+	TSS	0	-1.66667	1.18322	0.0190081	0.933333	1.41421	3.59759e-12	0.8	1.98997	5.99593e-13	1.2	2.97546	1.28324e-13
12140			+	UND	0	-0.266667	0.432494	0.0901936	-0.0666667	0.355546	0.663457	0.466667	0.489898	3.68796e-06	0.2	0.783157	0.000165386
12142			+	PSS	0	-12.2	13.1149	5.54604e-13	-2.46667	5.69678	3.68795e-16	14.3333	6.44281	4.76448e-18	-2.06667	14.4463	5.54953e-13
12143			+	UND	0	-1	1.34667	0.00195992	0.0666667	0.632456	0.501272	0.2	0.711852	0.00055349	-0.2	0.476952	4.39966e-05
12144			+	TSS	0	-0.6	0.739369	0.8022	0.0666667	0.2	0.0588952	0.866667	0.541626	6.06973e-11	-0.333333	0.632456	4.55546e-08
12159			+	TSS	0	-0.466667	0.4	0.00527724	0	0.258199	0.0725694	0.933333	0.577353	2.47107e-09	0.866667	1.25543	3.11546e-10
12163	dnaK	+
12175			+	UND	0	-0.466667	0.721113	0.00465352	-0.2	0.163299	1	0.6	0.382978	1	0.266667	0.774597	4.09174e-08
12529			+	UND	0	-0.933333	1.26323	1.23856e-05	-0.333333	0.282843	0.107854	0.2	0.588785	0.515102	2.06667	1.6773	5.3619e-10
12891			+	UND	0	-2	2.67333	9.72727e-11	-2	2.51661	2.50398e-07	4.86667	3.46987	9.51292e-16	1.13333	6.19785	3.37413e-15
13052			+	UND	0	0.866667	2.27156	6.48663e-09	-1.86667	2.15969	0.783682	2.66667	1.57563	1.33633e-13	2	1.95959	3.18492e-15
14069			+	UND	0	1	1.22746	2.55467e-11	-0.933333	1.31149	0.000798953	1.26667	0.621825	1.17339e-12	3.33333	0.632456	1.67977e-15
14079	\dnaK	\+
14168	dnaJ	+
14567			+	UND	0	-0.666667	2.13289	1.95799e-08	-0.8	0.992121	0.00244076	0.466667	0.632456	0.000284979	-0.466667	0.663325	0.0661194
15298	\dnaJ	\+
15445	insL1	+
16557	\insL1	\+
16751	mokChokC	--
16903	\hokC	\-
16952	sokC	+
16959			+	UND	0	-0.8	1.53188	0.000399779	-0.133333	0.6	0.000582417	-0.2	0.553775	0.622632	1.13333	1.84753	0.00651507
16960	\mokC	\-
17006	\sokC	\+
17454			+	TSS	0	-0.733333	1.11355	0.00126333	-0.0666667	0.565685	0.4787	0.633333	1.98712	9.19784e-08	-0.633333	0.994987	0.00304925
17489	nhaA	+
18655	\nhaA	\+
18715	nhaR	+
19620	\nhaR	\+
19811	insB1	-
20233	insA	-
20314	\insB1	\-
20508	\insA	\-
20815	rpsT	-
20908			-	UND	0	-0.333333	2.55886	1.31714e-07	-1	1.91485	1.18175e-09	-0.4	0.832666	4.10464e-06	0.933333	0.986577	1.89557e-09
20917			-	UND	0	-0.333333	1.78252	0.000260712	-0.466667	0.791623	0.0407502	-0.0666667	0.416333	0.620242	0	0.346412	0.00633551
20918			-	UND	0	0.133333	1.4376	0.000313582	-0.666667	1.51117	0.0304554	-0.266667	0.577353	0.720385	0.4	0.553775	0.015847
20926			-	UND	0	-0.466667	0.846347	0.0431307	-0.2	0.553775	0.0024249	0.266667	0.565685	0.00114634	-0.2	0.621825	0.0853795
20927			-	PSS	0	-3.06667	6.72669	8.94935e-09	-3.73333	3.72559	0.00558669	0.333333	0.9185	3.95662e-05	0.733333	1.57929	2.22752e-05
20934			-	TSS	0	0.4	1.48324	0.000159968	-0.8	1.41421	0.000497533	0	0.461882	0.00154074	0.0666667	0.541626	0.00163885
20936			-	UND	0	-0.866667	1.9799	1.05529e-05	-0.4	1.15475	4.80411e-06	-0.2	0.447214	0.0583207	0.133333	0.461882	0.0303196
21078	\rpsT	\-
21092			-	TSS	0	0.0666667	0.553775	1.26645e-11	-0.6	0.4	0.000695431	0.533333	0.642916	1.50379e-08	-0.4	0.6	2.55995e-05
21096			-	UND	0	0.866667	2.39418	1.13442e-13	-0.6	2.11661	5.00342e-12	-0.2	1.68312	4.38457e-11	-0.533333	1.43295	2.70709e-12
21109			-	UND	0	0.933333	0.916515	2.3403e-07	-0.6	0.923764	1.66833e-08	0.866667	1.73259	1.17661e-06	-1	1.75499	0.000815139
21110			-	UND	0	4.4	1.29196	1.03358e-17	2.73333	11.1194	2.16323e-18	-9.86667	8.95321	6.94117e-16	4	5.49424	5.77926e-17
21112			-	TSS	0	0.2	2.93258	2.96104e-08	-1.53333	2.64575	2.47632e-10	-0.8	0.653197	6.92504e-06	0.6	0.894427	8.39487e-09
21113			-	UND	0	0.4	0.721113	4.42028e-09	-0.933333	0.489898	0.094335	0.533333	0.282843	0.00012227	-0.266667	0.447214	0.00174107
21115			-	TSS	0	0	4.26578	7.94357e-15	-1.13333	2.45764	3.38946e-12	-0.266667	1.95959	4.58362e-13	1.93333	3.72458	1.58529e-11
21116			-	TSS	0	30.3333	95.1433	2.22501e-21	-91.6	55.4686	1.26633e-20	47.9333	47.2185	2.15269e-20	20.6667	85.969	4.85338e-20
21117			-	TSS	0	5.53333	26.199	6.29131e-18	-18.6	17.6448	6.22616e-18	12.7333	12.9491	4.20163e-18	5.66667	18.9835	4.08563e-17
21118			-	TSS	0	1.4	2.66556	2.40915e-11	-1.8	1.5535	2.82121e-13	0.933333	1.94257	3.33671e-13	-0.133333	1.46593	2.15839e-13
21119			-	TSS	0	0.466667	1.47874	4.78625e-12	-0.933333	1	3.89276e-09	1.6	0.577353	1.28179e-10	-0.0666667	0.8	1.72144e-12
21181	yaaY	+
21204			-	TSS	0	-0.4	0.923764	1.53719e-11	-0.6	0.382978	6.348e-06	0.866667	0.432494	6.4935e-10	0.533333	1.22222	8.33389e-10
21205			-	TSS	0	9.86667	19.2347	7.55542e-20	-28.0667	14.2746	8.14584e-18	2.33333	5.39984	1.85636e-17	4.53333	6.11773	8.90076e-18
21206			-	UND	0	1	1.12546	1.80026e-13	-1.66667	0.986577	0.000872016	0.333333	0.663325	4.27432e-06	0.2	0.692823	1.71497e-08
21207			-	UND	0	-0.733333	1.25963	3.22093e-12	-0.733333	0.848528	3.08296e-11	0.2	0.683135	9.49375e-09	0.2	0.99332	3.08505e-07
21383			+	TSS	0	2.06667	2.95522	5.20327e-14	-4.2	2.76164	0.0258007	0.6	0.588785	2.18211e-06	0.666667	1.51982	2.32304e-07
21384			+	UND	0	-0.266667	0.894427	0.000172698	-0.666667	0.516398	0.806382	0.333333	0.346412	0.000471308	-1.24345e-15	0.461882	0.000676377
21399	\yaaY	\+
21407	ribF	+
22348	\ribF	\+
22391	ileS	+
25207	lspA \ileS	+ \+
25701	\lspA	\+
25826	fkpB	+
26275	\fkpB	\+
26277	ispH	+
27227	\ispH	\+
27293	rihC	+
28207	\rihC	\+
28374	dapB	+
29195	\dapB	\+
29651	carA	+
30799	\carA	\+
30817	carB	+
34038	\carB	\+
34300	caiF	+
34686			+	TSS	0	0.733333	0.355546	1	1.73333	2.26523	1.54572e-10	1.2	2.95761	6.93831e-09	1.53333	2.17138	1.7922e-08
34695	\caiF	\+
34781	caiE	-
35371	\caiE	\-
35377	caiD	-
36162	\caiD	\-
36271	caiC	-
37824	\caiC	\-
37898	caiB	-
39115	\caiB	\-
39244	caiA	-
40386	\caiA	\-
40417	caiT	-
41931	\caiT	\-
42403	fixA	+
43173	\fixA	\+
43188	fixB	+
44129	\fixB	\+
44180	fixC	+
45463	fixX	+
45466	\fixC	\+
45750	\fixX	\+
45807	yaaU	+
47138	\yaaU	\+
47246	kefF	+
47769	kefC	+
47776	\kefF	\+
49631	\kefC	\+
49823	folA	+
50302	\folA	\+
50380	apaH	-
51222	\apaH	\-
51229	apaG	-
51606	\apaG	\-
51609	rsmA	-
52427	pdxA	-
52430	\rsmA	\-
52585			-	UND	0	-1	0.992121	0.0409753	-0.0666667	0.611193	0.000476195	0.0666667	0.447214	0.000958458	0.0666667	0.461882	1.70293e-05
53416	surA \pdxA	- \-
53428			-	PSS	0	0.533333	1.15475	0.000207783	0.466667	1.93218	7.10089e-05	0.6	1.89737	1.13369e-05	3.26667	4.66192	2.02142e-08
53533			-	UND	0	0.4	0.163299	1	0.733333	0.832666	1.0003e-07	-0.7	0.954385	0.0474281	1.36667	1.29683	2.98013e-09
53556			-	UND	0	0.533333	0.4	1.086e-06	-0.333333	0.533223	0.0210388	0.133333	0.533223	0.000543102	1.73333	3.32643	0.000116195
54569			-	PSS	0	-0.0666667	0.565685	0.0650104	1.6	1.11355	1.90024e-08	0.533333	1.56631	6.38746e-10	-0.6	1.64114	4.02596e-07
54603			-	UND	0	-0.133333	0.461882	1.84378e-07	1.2	0.882938	5.67878e-11	0.733333	1.37598	3.84615e-13	2.86667	2.97462	7.53386e-15
54700			-	UND	0	0.2	0.2	1	1.46667	1.18884	1.00922e-05	-0.733333	1.21161	6.84584e-07	0.733333	0.683135	2.98181e-07
54702	\surA	\-
54720			-	UND	0	0.333333	0.355546	1	0.133333	0.516398	0.0157369	0.666667	0.765942	5.77625e-07	-0.0666667	0.816497	6.90499e-05
54733			-	UND	0	0.133333	0.163299	1	1.9984e-16	0.2	0.0743373	1.33333	1.23288	6.18179e-07	0.266667	1.7982	1.02643e-09
54743			-	UND	0	0.0666667	0.355546	0.0630618	0.2	0.565685	0.0284111	0.8	0.653197	1.55579e-09	1.46667	1.11514	4.08889e-13
54744			-	UND	0	0.4	0.489898	0.000526608	-1.42109e-15	0.748331	0.0109606	2	1.78512	9.43228e-11	0.333333	2.25389	3.04716e-13
54755	lptD	-
54763			-	UND	0	0.333333	0.711852	0.0532839	-0.2	0.721113	3.46267e-05	0.533333	0.723769	2.33336e-06	0.4	1.83251	2.14594e-09
55297			-	UND	0	0.133333	0.2	0.00196793	0.2	0.461882	0.000543753	1.66667	0.824621	1.51254e-13	0.2	1.53188	7.64608e-11
55357			-	UND	0	0.2	0.2	1	0.2	0.432494	0.000297984	0.6	0.611193	4.50475e-07	0.333333	1.7733	6.4539e-09
55358			-	UND	0	0	0.163299	0.560913	0.4	0.476952	0.000135812	0.2	0.621825	0.000185762	1.4	1.94594	1.87714e-09
56205			-	UND	0	-1.8	2.51926	0.0133643	-0.466667	0.972968	0.0017888	-0.266667	0.239418	1	0.4	0.529153	1
57109	\lptD	\-
57154			-	UND	0	-1.26667	1.32796	0.000316033	-0.266667	0.416333	0.537081	0.0666667	0.461882	0.045899	1	0.632456	1.77216e-07
57169			+	UND	0	1	0.816497	1	-0.4	0.856349	7.52328e-07	0.466667	0.663325	8.11614e-09	-0.2	0.739369	2.02619e-06
57239			-	TSS	0	0	0.886942	6.87111e-13	-1.33333	0.653197	0.020212	0.733333	0.739369	4.81892e-11	-0.733333	0.683135	0.00169183
57364	djlA	+
58179	\djlA	\+
58474	yabP	+
58946			+	PSS	0	-0.2	0.382978	0.773759	1	0.791623	1.78467e-05	0.133333	1.21161	0.000103418	1	2.91662	8.46698e-05
59279	\yabP	\+
59687	rluA	-
60346	\rluA	\-
60358	rapA	-
61655			+	UND	0	-0.733333	0.673333	0.135622	0.6	0.447214	9.20943e-05	-0.466667	0.476952	0.00253788	-6.21725e-16	0.516398	0.552058
61656			+	UND	0	-1.4	1.34165	0.0312013	-6.21725e-16	0.432494	0.000443979	0.2	0.432494	1.22913e-07	0.0666667	0.447214	4.00058e-06
63264	\rapA	\-
63355			-	UND	0	2.06667	1.81177	2.82615e-11	-2	1.81177	1.79797e-06	0.866667	0.621825	8.88309e-12	0.2	1.22746	1.24567e-09
63429	polB	-
65780	\polB	\-
65855	araD	-
66550	\araD	\-
66835	araA	-
68337	\araA	\-
68348	araB	-
70048	\araB	\-
70387	araC	+
71265	\araC	\+
71269			+	UND	0	0.733333	0.757188	1	0	0.846347	6.87656e-09	1	0.894427	1.53042e-10	1.53333	1.95445	2.57183e-13
71270			+	UND	0	1.13333	0.864988	1	-0.0666667	0.894427	4.10508e-12	2.8	1.55778	6.41927e-15	-0.333333	2.54558	1.33752e-13
71271			+	TSS	0	50.4	34.4932	1.79109e-19	-0.2	34.8535	1.70365e-20	51.0333	42.9855	1.08468e-20	60.3667	124.713	5.63123e-21
71272			+	UND	0	1.13333	1.83251	1	-0.4	1.26491	1.00764e-06	1.6	1.77764	4.90496e-10	1.33333	3	6.29546e-14
71351	yabI	+
71355			+	UND	0	-0.2	0.346412	0.933764	0.8	0.916515	1	-0.133333	0.966918	0.000223214	0.8	0.588785	2.3877e-05
71372			+	PSS	0	0.6	0.6	1	0.533333	0.783157	2.12419e-05	-0.466667	0.711852	0.000321589	0.866667	1.1755	4.45235e-05
71879			+	PSS	0	0.333333	0.416333	1	0.866667	1.66446	3.38598e-05	1.33333	1.43295	5.91504e-06	1.4	1.69756	2.68809e-08
72088			+	UND	0	0.2	0.346412	1	0.466667	0.461882	7.56967e-05	2.2	1.47874	4.34373e-08	-2.26667	1.53623	0.000415136
72089			+	PSS	0	0.333333	0.416333	0.0111222	0.866667	0.765942	7.78232e-08	2.86667	0.923764	6.68545e-12	-2.86667	0.979796	7.69012e-07
72115	\yabI	\+
72229	thiQ	-
72911	thiP	-
72927	\thiQ	\-
74497	thiB	-
74521	\thiP	\-
75480	\thiB	\-
75606			-	UND	0	0.533333	3.27414	8.02546e-15	-1.46667	3.5683	1.33379e-13	-1.33333	2.17256	9.09269e-07	-0.6	1.249	0.0214982
75644	sgrR	-
77299	\sgrR	\-
77367	sgrS	+
77388	sgrT	+
77519	\sgrT	\+
77593	\sgrS	\+
77621	setA	+
78799	\setA	\+
78848	leuD	-
79453	\leuD	\-
79464	leuC	-
80864	\leuC	\-
80867	leuB	-
81958	leuA \leuB	- \-
83529	\leuA	\-
83622	leuL	-
83708	\leuL	\-
83733			-	TSS	0	-1.6	1.17757	0.0294877	-0.2	0.432494	0.0796966	0.533333	0.4	2.847e-06	-0.0666667	0.952195	0.0377624
84368	leuO	+
85312	\leuO	\+
85630	ilvI	+
87354	\ilvI	\+
87357	ilvH	+
87848	\ilvH	\+
87969			+	TSS	0	-5.8	3.93277	1.10588e-11	-1.06667	0.757188	0.53709	0.2	0.553775	0.000980793	0.4	0.533223	2.17687e-10
88028	cra	+
89032	\cra	\+
89589			+	TSS	0	-3.93333	5.46992	1.98971e-10	-2.66667	0.9185	0.0186731	0.866667	1.28582	5.10344e-05	0.866667	1.25963	1.07142e-09
89590			+	TSS	0	-1.2	1.77388	2.60911e-05	-0.733333	0.882938	0.00883024	1.33333	0.9185	1.08948e-05	-0.466667	0.816497	3.63353e-07
89634	mraZ	+
90092	\mraZ	\+
90094	rsmH	+
90682			+	PSS	0	0.266667	3.39676	9.21149e-11	-3.26667	2.95522	0.000292971	0.666667	1.26323	2.08379e-07	0.266667	2.15969	0.000137755
90683			+	UND	0	0.333333	1.23828	1.56284e-09	-1.2	0.848528	0.0726065	0.266667	0.365148	0.00075052	0.6	0.886942	1.50005e-06
90687			+	UND	0	-1.4	2.58457	1.19242e-12	-1.53333	1.37114	0.000940131	0.133333	0.346412	1.44485e-05	0.533333	0.565685	4.55398e-09
91032	ftsL	+
91035	\rsmH	\+
91397	\ftsL	\+
91413	ftsI	+
92484			+	UND	0	0.2	0.832666	8.1843e-07	-0.866667	0.632456	0.634687	0.2	0.382978	0.0199968	0.666667	0.979796	3.10827e-06
92485			+	TSS	0	-11.2667	39.3173	3.24418e-13	-23.4667	2.56534	7.75286e-09	1.66667	5.38269	1.5327e-08	7.33333	11.782	1.74119e-14
93166	murE	+
93179	\ftsI	\+
94650	murF	+
94653	\murE	\+
96002	mraY	+
96008	\murF	\+
97084	\mraY	\+
97087	murD	+
98403	ftsW \murD	+ \+
99644	murG	+
99647	\ftsW	\+
100711	\murG	\+
100765	murC	+
102233	ddlB	+
102240	\murC	\+
103153	\ddlB	\+
103155	ftsQ	+
103982	ftsA	+
103985	\ftsQ	\+
104537			+	UND	0	0.133333	0.516398	0.456544	7.99361e-16	0.529153	0.00102758	0.2	0.416333	1.24513e-05	1.4	1.35647	3.72914e-12
104538			+	UND	0	0.333333	0.416333	1	0.8	0.992121	2.98244e-05	0.533333	1.12546	5.74901e-10	-0.4	1.4376	8.31872e-07
104539			+	UND	0	0.2	0.382978	0.0376185	0.133333	0.541626	0.000452957	0.733333	0.723769	3.00721e-05	0.933333	2.53331	1.08621e-10
104560			+	PSS	0	0.933333	1.51438	3.42672e-12	-0.866667	1.5535	1.76895e-05	1.33333	1.69756	3.00509e-08	0.6	3.125	7.25492e-11
105087			+	UND	0	-0.266667	0.541626	0.0023421	0.4	0.6	1.4515e-06	0.2	0.653197	8.12189e-11	1.66667	0.99332	2.15613e-13
105244	\ftsA	\+
105305	ftsZ	+
106456	\ftsZ	\+
106507			+	TSS	0	-0.733333	1.89342	0.000267563	-0.533333	0.355546	1	0.333333	0.365148	1	0.133333	0.489898	2.34785e-05
106508			+	TSS	0	-2.86667	3.59729	1.27299e-08	-2.2	0.939493	0.000617306	0.266667	0.4	3.07373e-06	-0.133333	0.346412	0.000390519
106530			+	TSS	0	-3.8	1.55545	2.4263e-10	-1.33333	0.879394	0.000517232	0.266667	0.611193	2.80779e-06	0.0666667	0.765942	7.21716e-06
106557	lpxC	+
106940			+	UND	0	-0.333333	0.432494	0.0312006	0.133333	0.516398	0.000343604	-0.266667	0.461882	0.0819757	0.533333	0.783157	0.000468481
107474	\lpxC	\+
107668			+	TSS	0	-6.46667	6.14166	4.94929e-11	-2.53333	2.87981	3.24069e-10	3	1.76257	2.11729e-11	0.266667	2.22716	2.79095e-12
107705	secM	+
108217	\secM	\+
108279	secA	+
110984	\secA	\+
111044	mutT	+
111433	\mutT	\+
111649	yacG	-
111846	\yacG	\-
111856	zapD	-
112599	coaE \zapD	- \-
113219	\coaE	\-
113394			+	TSS	0	-1.4	1.94594	0.000182489	-0.8	1.79629	0.0153586	1.53333	2.36798	2.88109e-05	-1.33333	2.36798	0.000429116
113396			+	TSS	0	1	2.54296	0.369301	-1.13333	2.57423	0.0259842	-0.133333	0.461882	0.0706045	0.2	0.282843	0.000670147
113444	guaC	+
114487	\guaC	\+
114522	hofC	-
115714	hofB	-
115724	\hofC	\-
117099	\hofB	\-
117109	ppdD	-
117549	\ppdD	\-
117752	nadC	-
118645	\nadC	\-
118733	ampD	+
119281	ampE	+
119284	\ampD	\+
120135	\ampE	\+
120178	aroP	-
121551	\aroP	\-
122034			+	TSS	0	1.13333	2.51396	5.0712e-16	-3	1.97315	1.02744e-14	-1.06667	2.83784	7.5102e-07	-1.26667	2.52455	9.15314e-08
122092	pdhR	+
122856	\pdhR	\+
122882			+	UND	0	0.333333	1.95278	6.13423e-05	-1.06667	1.7127	0.0120237	-0.133333	0.642916	0.0299036	-0.4	0.4	0.999989
122967			+	UND	0	0.4	0.894427	1.10799e-06	-0.8	0.774597	0.0799951	0.333333	0.382978	1.57221e-05	-0.2	0.447214	0.00488786
122969			+	UND	0	2.73333	9.52542	8.27032e-18	-9.06667	8.61936	8.14847e-17	-1.33333	2.64323	2.97298e-14	-2.33333	2.61236	5.52103e-12
122975			+	UND	0	-1.06667	1.62699	3.19418e-10	0.133333	0.721113	5.0948e-07	-0.6	0.711852	0.0609839	-0.0666667	0.355546	0.640686
122982			+	TSS	0	-1.2	0.894427	0.000494458	0.0666667	0.621825	0.000631308	-0.2	0.642916	0.00189219	0.133333	0.326599	0.000916383
122991			+	UND	0	-0.733333	0.99332	9.68784e-06	-0.466667	0.476952	0.806387	0.533333	0.282843	8.4543e-10	-0.533333	0.282843	0.872382
123017	aceE	+
123543			+	PSS	0	-0.266667	1.97653	1.21656e-06	-0.466667	1.44684	7.4185e-05	-0.333333	0.461882	0.000710553	-0.4	0.258199	0.888878
123628			+	UND	0	0.8	1.78885	0.00345518	-1.33333	1.7359	0.0417161	-0.133333	0.382978	0.719574	-0.133333	0.239418	0.928045
123672			+	UND	0	0.266667	1.72434	1.04581e-05	-1.53333	0.882938	0.846405	0.8	0.432494	6.31086e-05	-0.8	0.432494	0.844483
125680	\aceE	\+
125695	aceF	+
127587	\aceF	\+
127701			+	PSS	0	-0.666667	0.783157	0.0305819	0.266667	0.757188	0.000419825	-0.333333	0.732967	0.00331586	0.533333	0.9185	0.000559356
127717			+	TSS	0	-3	2.62854	2.16049e-15	-4.4	2.85657	1.34521e-15	12.5333	7.85451	9.64805e-17	-2.6	8.72544	2.38022e-16
127718			+	TSS	0	-0.666667	1.87972	7.22259e-14	-0.8	2.22261	3.2095e-12	4.43333	4.97896	7.52168e-13	-2.63333	4.92714	1.62101e-11
127719			+	UND	0	-0.466667	0.8	1.0096e-11	-0.333333	0.632456	2.19422e-11	0.933333	1.25433	6.27631e-10	-0.166667	1.39435	1.08775e-11
127912	lpd	+
128167			+	PSS	0	-3.4	5.39984	1.30507e-13	-1.93333	2.94438	6.58028e-07	0.466667	1.48773	1.60146e-09	0.133333	1.89385	6.60961e-07
129336	\lpd	\+
129407	yacH	-
131260	\yacH	\-
131519			+	TSS	0	-5.06667	5.26624	5.74016e-05	-1.13333	1.15475	0.446048	1.26667	0.765942	1.16905e-05	1.53333	4.23173	0.00324494
131520			+	UND	0	-2.53333	2.38677	1.86879e-10	-0.666667	0.447214	0.00244076	0.4	0.461882	6.3569e-06	1.06667	1.57482	1.568e-08
131615	acnB	+
134212	\acnB	\+
134388	yacL	+
134750	\yacL	\+
134788	speD	-
135582	\speD	\-
135598	speE	-
136464	\speE	\-
136570	yacC	-
136917	\yacC	\-
137083	cueO	+
138633	\cueO	\+
138835	gcd	-
141225	\gcd	\-
141261			-	UND	0	1.8	3.18329	3.79281e-08	-2	3.14749	3.57706e-05	-0.133333	0.879394	0.00870228	-0.4	0.765942	0.616161
141360			+	TSS	0	-12.9333	11.4245	3.66744e-16	-3	4.32512	6.11761e-09	0.133333	3.52136	2.75167e-14	0.0666667	4.87852	3.21398e-08
141361			+	TSS	0	-1.33333	1.69756	9.07512e-08	-1	0.952195	4.28603e-08	0.733333	1.94936	2.75484e-09	-1.33333	1.76635	2.65454e-06
141431	hpt	+
141967	\hpt	\+
142008	can	-
142148			-	PSS	0	-0.4	1.78875	0.000133138	-0.733333	1.26323	0.541865	0.4	0.653197	0.000261915	0.2	0.791623	0.000161173
142670	\can	\-
142701			-	TSS	0	-7.2	5.76137	3.45371e-14	-3.53333	2.7887	1.0854e-07	3.66667	1.27176	1.74545e-14	-1.42109e-14	3.33467	6.17889e-14
142702			-	TSS	0	-1.8	2.68796	1.03651e-05	-1	1.45622	1.32242e-05	0.2	0.282843	2.23346e-05	1	1.78885	1.27692e-05
142779	yadG	+
143702	yadH	+
143705	\yadG	\+
144472	\yadH	\+
144577	yadI	+
145017	\yadI	\+
145081	yadE	+
146310	\yadE	\+
146314	panD	-
146694	\panD	\-
146752			-	UND	0	-1.86667	2.92575	0.036933	-0.333333	0.632456	0.102272	0	0.258199	0.693021	0.133333	0.432494	0.0411366
146968	yadD	+
147583			+	UND	0	-1.73333	1.4376	0.000885417	-0.133333	0.282843	0.0612059	-0.0666667	0.346412	0.639676	0	0.258199	0.112917
147870	\yadD	\+
147944	panC	-
148795	\panC	\-
148807	panB	-
148852			-	TSS	0	-2.93333	2.498	3.81179e-09	-0.933333	1.34667	0.0134684	0	0.447214	0.000641379	0.333333	0.783157	0.00039269
149601	\panB	\-
149628			-	UND	0	-0.4	0.846347	3.80506e-06	-0.0666667	0.529153	2.18325e-06	-0.333333	0.489898	0.0889986	0.266667	0.346412	2.48602e-07
149715	yadC	-
150548			+	UND	0	-1.13333	1.64161	0.000275097	-0.533333	0.489898	0.846397	0.4	0.476952	0.000238127	-0.133333	0.553775	0.0446456
150953	\yadC	\-
151003	yadK	-
151599	\yadK	\-
151626	yadL	-
152231	\yadL	\-
152243	yadM	-
152812	\yadM	\-
152829	htrE	-
155426	\htrE	\-
155461	yadV	-
156201	\yadV	\-
156299	yadN	-
156883	\yadN	\-
157253	folK	-
157729	pcnB	-
157732	\folK	\-
159126	\pcnB	\-
159186	gluQ	-
160112	\gluQ	\-
160149	dksA	-
160604	\dksA	\-
160649			-	PSS	0	-1.13333	2.44444	1.36255e-05	-0.866667	1.64114	0.00828439	0.0666667	1.26323	0.000123425	1.2	1.76257	3.05321e-05
160650			-	PSS	0	-0.666667	1.68127	0.000193157	-0.866667	0.832666	1	0.133333	0.115475	1	0.666667	0.239418	0.000115772
160654			-	UND	0	-1.06667	1.88326	4.50924e-11	-1.93333	1.12546	0.0187554	0.333333	0.476952	4.51762e-08	0.533333	0.748331	4.10838e-09
160655			-	TSS	0	-13.5333	12.1397	4.11272e-17	-8.33333	5.75362	1.54614e-08	1.86667	2.12629	9.33712e-15	4.6	2.55817	3.68226e-16
160656			-	UND	0	-1	1.21161	0.0155259	-0.266667	0.565685	0.633911	0	0.258199	0.0867245	0.8	0.721113	2.18791e-08
160657			-	TSS	0	-0.333333	1.47422	1.69898e-06	-0.4	0.986577	1.70773e-06	-0.333333	0.447214	0.0521809	0.8	0.516398	8.12997e-07
160782	sfsA	-
161375			-	UND	0	-3.33333	1.99332	0.0567674	-0.266667	0.355546	0.999948	0.133333	0.239418	1	0.8	0.476952	4.33667e-05
161486	\sfsA	\-
161501	ligT	-
162031	\ligT	\-
162105	hrpB	+
164534	\hrpB	\+
164730	mrcB	+
167264	\mrcB	\+
167484	fhuA	+
169727	\fhuA	\+
169778	fhuC	+
170575	fhuD \fhuC	+ \+
171462	fhuB	+
171465	\fhuD	\+
173444	\fhuB	\+
173602	hemL	-
174882	\hemL	\-
174917			-	TSS	0	0.133333	1.78252	1.73626e-08	-0.733333	1.12546	0.417956	-1.42109e-15	0.6	3.77647e-05	0.4	0.577353	9.89189e-08
175107	clcA	+
176528	\clcA	\+
176592			+	UND	0	0.2	0.748331	2.78512e-10	-0.4	0.553775	1.05923e-05	-0.133333	0.282843	0.0531775	7.99361e-16	0.346412	0.0027095
176610	erpA	+
176954	\erpA	\+
177001	yadS	-
177624	\yadS	\-
177662	btuF	-
178455	mtn	-
178462	\btuF	\-
179153	\mtn	\-
179179			-	TSS	0	-2.13333	2.93485	2.20587e-08	-2	2.39679	6.6113e-06	-0.0666667	0.732967	0.0459239	1.13333	1.89737	3.63152e-08
179237	dgt	+
180754	\dgt	\+
180840			+	UND	0	0.333333	0.365148	1	-0.133333	0.4	0.00184302	0.466667	0.447214	0.000234148	1.06667	0.774597	1.18495e-11
180841			+	UND	0	0.333333	0.355546	1	0.333333	0.621825	8.14351e-05	0.933333	0.979796	2.04714e-10	2.8	4.49592	8.49495e-14
180842			+	TSS	0	6.53333	2.91894	8.0728e-14	9.8	7.58156	2.32689e-17	13.8667	12.5127	3.33218e-18	23.8667	44.313	1.30663e-18
180843			+	TSS	0	3.46667	2.94438	2.71711e-06	3.66667	6.1763	4.77239e-15	14.3333	8.53373	2.35235e-17	10.2667	29.7116	2.00567e-17
180844			+	UND	0	19	7.22342	3.71335e-18	13.3333	17.6986	6.30879e-20	67.8	33.8363	2.98652e-21	26.2667	89.8266	2.88707e-21
180845			+	PSS	0	2.4	2.55886	2.55383e-13	7.86667	2.97321	2.83047e-17	6.93333	4.65761	2.68465e-17	3.46667	1.89436	1.74311e-17
180846			+	UND	0	4.86667	2.7526	7.39324e-16	3.6	3.19166	2.14784e-17	11.2	1.42886	6.8883e-18	0.333333	14.1887	1.6387e-17
180847			+	UND	0	0.733333	0.945163	1	0.666667	1	1.32555e-10	3.86667	1.61245	1.08087e-15	4.93333	5.85833	1.11191e-16
180849			+	UND	0	0.266667	0.355546	1	1.2	0.588785	6.61397e-11	1.33333	1.51117	5.71772e-14	0.4	2.18785	3.53681e-11
180850			+	PSS	0	0.533333	0.748331	3.88927e-09	4.86667	3.22766	6.19888e-16	1.8	3.55528	1.44883e-16	2.4	5.56657	1.78116e-16
180851			+	PSS	0	3.86667	2.3726	1.86389e-15	27.1333	13.1443	5.60677e-20	25.4	2.87375	3.55321e-20	2.73333	36.1432	6.70588e-20
180852			+	PSS	0	2.8	1.38821	1.77785e-14	28.4667	12.4188	5.93302e-20	25.7333	19.2262	4.17419e-20	25.2	53.7944	1.44716e-20
180853			+	UND	0	0.4	0.326599	1	2	1.66446	6.24064e-14	5.13333	2.93939	2.0646e-16	6.86667	11.5622	7.03707e-17
180854			+	UND	0	0.0666667	0.115475	1	0.333333	0.346412	0.000139738	2.06667	1.34165	3.53799e-11	2	3.11962	8.09353e-15
180855			+	UND	0	0	0	1	0.733333	0.673333	1	1.8	1.44223	5.75232e-13	0.466667	2.62361	7.03066e-14
180856			+	UND	0	0.133333	0.239418	1	0.8	0.565685	1.128e-09	3.33333	1.69756	5.45549e-15	3.26667	5.51241	5.30695e-16
180857			+	UND	0	1.06667	1.22222	9.73117e-13	19.4	3.92598	3.62625e-19	46.4667	14.6438	1.66938e-20	11.8	32.3676	1.34219e-20
180858			+	PSS	0	1	1.78252	2.58875e-05	11.8667	2.56125	2.98317e-18	34.4	8.68716	6.75071e-20	22.3333	35.5938	2.67186e-20
180859			+	UND	0	0.6	1.1646	0.000135517	12.5333	4.92269	5.65528e-18	21.5333	6.59798	2.40424e-19	6.53333	2.69138	2.3351e-19
180860			+	TSS	0	0.866667	1.45626	1.48027e-07	26.2667	5.45283	7.10615e-20	38.7333	9.79388	1.23678e-20	19.8	34.7425	6.62366e-21
180861			+	UND	0	0	0.163299	0.600484	1.86667	0.632456	2.29271e-14	6.13333	1.87972	1.07435e-16	10.1333	9.28368	8.41865e-18
180862			+	UND	0	0.0666667	0.115475	1	0.266667	0.2	1.08872e-05	1.4	0.916515	2.99457e-12	1.53333	1.64924	3.98536e-14
180863			+	UND	0	-0.0666667	0.115475	0.915645	0.8	0.99332	1	0.666667	1.15475	3.04175e-12	1.6	0.894427	1.8303e-14
180864			+	UND	0	0	0	1	1.06667	0.757188	1	1.46667	1.23288	1.30569e-13	1.53333	1.82287	5.82982e-15
180865			+	PSS	0	0.6	0.621825	8.06955e-05	0.8	0.748331	1.11684e-10	5.2	0.938832	6.67409e-16	-2	1.14395	9.21844e-15
180866			+	UND	0	0.0666667	0.115475	1	2.06667	1.14891	3.9798e-14	5.13333	2.498	2.30882e-16	4.73333	5.71314	4.29466e-17
180867			+	UND	0	0	0	1	0.0666667	0.115475	1	0.6	0.516398	1.6827e-06	1.53333	1.39235	5.76855e-13
180868			+	UND	0	0	0	1	1.2	1	1	1.13333	1.25963	1.74243e-13	2.4	1.39444	2.46217e-15
180874			+	UND	0	0.0666667	0.355546	0.0581923	0.733333	0.673333	4.63934e-09	0.6	0.938832	6.49666e-12	0.933333	1.25543	3.50789e-13
180875			+	UND	0	0.2	0.258199	1	1.13333	0.757188	9.0306e-11	1.33333	1.62488	1.47779e-13	1.33333	2	1.25789e-14
180876			+	UND	0	0.266667	0.365148	1	0.4	0.553775	6.74199e-05	1	0.529153	9.04492e-13	1.13333	1.78139	1.68503e-12
180880			+	UND	0	0.333333	0.239418	1	-0.0666667	0.326599	0.00115902	2.2	0.588785	4.08367e-13	-0.2	1.19443	2.47685e-13
180882			+	UND	0	0.0666667	0.115475	1	0.6	0.683135	8.79844e-07	0.6	0.952195	3.76749e-09	0.0666667	0.824621	1.03095e-11
180884	degP	+
180898			+	UND	0	0.133333	0.239418	0.0396317	0.8	0.683135	5.93979e-07	1	0.791623	4.38031e-10	0.333333	1.26323	8.04935e-11
181210			+	UND	0	0.133333	0.239418	1	0.8	0.565685	1.17384e-09	0.333333	1.19839	3.57662e-09	0.2	1.1646	1.25666e-09
181344			+	UND	0	0.133333	0.115475	1	0.266667	0.416333	0.0221946	1	1.61245	9.47747e-05	0.333333	1.66533	1.41366e-07
181382			+	UND	0	0.2	0.163299	1	0.6	0.516398	2.2347e-07	1.46667	0.642916	1.17608e-13	0.2	0.846347	3.59367e-13
181389			+	UND	0	0.466667	0.732967	0.0120014	0.533333	1.249	2.67108e-05	3.93333	1.28582	1.5295e-15	2.6	7.35119	1.31915e-15
181411			+	UND	0	0.4	0.516398	1	0.333333	0.8	8.62489e-07	0.533333	1.32796	3.39095e-07	-0.4	1.32796	1.05833e-06
181848			+	PSS	0	0.666667	0.577353	1	0.533333	0.9185	2.22982e-05	2.26667	0.945163	1.27762e-12	0.8	4.23636	1.47153e-08
181973			+	UND	0	0	0	1	0.133333	0.163299	1	2.66667	1.18884	1.63138e-12	-0.466667	2.86356	2.31254e-07
182308	\degP	\+
182463	cdaR	+
183620	\cdaR	\+
183709	yaeH	-
184095	\yaeH	\-
184257	yaeI	-
185069	\yaeI	\-
185123	dapD	-
185947	\dapD	\-
185974			-	TSS	0	-5	4.78888	6.10896e-16	-4.06667	1.7127	9.5317e-07	0.133333	1	5.801e-07	-0.133333	1.1646	2.53496e-09
185978	glnD	-
188650	\glnD	\-
188712	map	-
189506	\map	\-
189551			-	UND	0	-0.266667	2.46135	4.28628e-09	-1.4	2.97618	0.386212	-0.133333	0.732967	0.00149686	0.533333	0.663325	5.05247e-06
189712	tff	+	+	TSS	0	-0.666667	3.125	2.30191e-09	-3.13333	1.38565	2.72829e-10	1.46667	0.864988	2.1004e-10	2	3.7238	8.23939e-13
189713			+	TSS	0	-8.86667	17.1554	1.1678e-14	-11.6667	5.67454	8.07246e-15	6.2	5.36785	4.17589e-12	-2.46667	8.85965	2.84405e-11
189733			+	UND	0	0.2	0.163299	1	1.2	0.533223	2.74556e-08	1.53333	2.72764	9.33925e-13	-1.26667	3.38575	1.61024e-08
189741			+	UND	0	0	0	1	0.533333	0.416333	1	0.6	0.683135	3.09353e-09	0.666667	0.632456	3.34409e-13
189760			+	PSS	0	-0.0666667	0.721113	0.000628942	0.4	0.621825	8.61415e-07	0.4	0.653197	3.69367e-07	-0.333333	0.683135	2.8159e-06
189847	\tff	\+
189853			+	UND	0	0.333333	0.642916	9.60659e-11	-0.133333	0.611193	2.13372e-11	-0.266667	0.447214	5.16039e-06	0.133333	0.711852	1.12431e-05
189866			+	UND	0	-0.133333	0.565685	0.0305806	0.866667	1.11514	1.08507e-07	-0.666667	1.11514	0.000652878	0.466667	0.856349	0.000222842
189874	rpsB	+
190118			+	UND	0	-1.93333	1.68523	2.0124e-10	-1	0.972968	5.00032e-06	-0.0666667	0.653197	9.99195e-06	0.333333	0.8	4.24003e-06
190599	\rpsB	\+	+	UND	0	-0.266667	0.783157	2.53985e-06	-0.2	0.326599	0.000535677	0.0666667	0.541626	0.0260031	-0.0666667	0.732967	0.0458707
190605			+	PSS	0	-3	3.58714	0.00014578	-0.4	0.8	0.0304558	0.2	0.748331	0.000515615	0.133333	0.611193	0.000193301
190857	tsf	+
191708	\tsf	\+
191855	pyrH	+
192580	\pyrH	\+
192617			+	TSS	0	-4.4	5.27687	1.18571e-14	-2	1.68523	9.29986e-12	-0.4	1.17757	3.64149e-10	-0.666667	0.832666	1.01406e-10
192863			+	UND	0	-0.0666667	1.59967	1.84322e-06	-0.866667	1.13138	0.0643688	0	0.432494	0.609413	0	0.382978	0.00423942
192872	frr	+
193429	\frr	\+
193521	dxr	+
194717	\dxr	\+
194903	ispU	+
195664	\ispU	\+
195677	cdsA	+
196534	\cdsA	\+
196546	rseP	+
197025			+	TSS	0	1.46667	1.14395	1	0.0666667	1.52315	8.1238e-10	4.33333	4.84112	8.86795e-11	-3.6	4.92259	1.6278e-09
197026			+	TSS	0	65.8	67.9276	2.6921e-18	-9.26667	7.42486	5.01653e-20	101.533	123.479	6.01335e-20	-71.2	138.137	1.13085e-18
197299			+	UND	0	-1.66667	2.92826	2.35691e-12	-1.46667	0.774597	0.846405	0.2	0.258199	0.0298519	-0.2	0.258199	0.869235
197364			+	UND	0	0	0.382978	0.00446346	0	0.355546	0.051155	1.06667	0.4	9.65301e-10	-0.266667	1.7733	3.75996e-06
197366			+	UND	0	0.933333	0.673333	1	-0.466667	0.711852	5.20726e-08	0.4	0.489898	6.52459e-09	0.0666667	0.632456	9.99331e-07
197369			+	UND	0	1.73333	1.11355	2.12825e-10	-0.533333	1.28582	6.95847e-11	3.13333	1.45626	7.41879e-12	-0.866667	3.59629	1.51484e-08
197370			+	TSS	0	4.53333	4.89762	1.27857e-13	-2	5.32416	6.51401e-14	6	2.58457	4.41297e-15	1.86667	5.55338	3.99797e-15
197371			+	TSS	0	8.4	8.75477	3.83916e-13	-3.46667	8.86115	5.448e-16	13.8	4.33436	2.88781e-17	-2.3	9.79313	2.43822e-16
197403			+	UND	0	-0.2	1.39235	2.72757e-09	3.8	2.54822	7.39166e-16	4.8	3.76829	1.11022e-16	-3.06667	4.44672	2.62319e-15
197404			+	UND	0	0.0666667	0.2	0.0817523	0.6	0.533223	4.92478e-07	1.06667	0.739369	4.1799e-13	-0.4	1.32796	1.45407e-11
197405			+	UND	0	-0.0666667	0.2	0.124022	0.466667	0.541626	8.86687e-05	0.466667	0.986577	3.0382e-07	1.53333	2.43584	4.35798e-08
197495			+	PSS	0	0.6	0.447214	3.14835e-05	0.866667	0.732967	5.55315e-06	3.8	3.78242	1.15027e-11	-1.4	4.12149	1.84947e-08
197496			+	UND	0	0.0666667	0.2	0.052128	0.266667	0.326599	7.2743e-06	1.33333	1.48773	1.99841e-09	-1.13333	1.48773	6.26596e-08
197586			+	UND	0	0.466667	0.565685	1.07016e-11	2.06667	1.13246	1.41942e-15	0.466667	1.71659	1.45815e-14	0.866667	2.14476	3.96401e-15
197587			+	PSS	0	0.133333	0.115475	1	1.6	0.6	4.65605e-08	0.0666667	0.952195	7.08738e-10	1.13333	1.56631	1.09165e-08
197590			+	UND	0	0.333333	0.163299	1	1.4	1.13138	1.2105e-10	1.13333	1.36626	3.64094e-14	0.2	1.49492	4.68045e-14
197612			+	UND	0	0.0666667	0.565685	0.000355939	0.8	0.816497	3.53468e-10	-0.2	0.739369	3.11233e-07	0.666667	0.748331	7.19598e-12
197820			+	PSS	0	0.266667	0.365148	0.000220036	0.4	0.765942	6.31513e-09	-0.333333	0.824621	1.07295e-05	0.6	0.938832	1.86917e-08
197823			+	PSS	0	-0.2	0.355546	0.0920955	1	0.663325	3.36159e-05	0.466667	1.74738	4.10384e-07	-0.533333	1.64114	5.07105e-05
197874			+	UND	0	0.133333	0.541626	0.00126431	1.13333	0.565685	1.99596e-10	-0.4	0.894427	1.95452e-07	1.8	2.39418	4.05057e-13
197875			+	UND	0	-0.2	0.258199	0.812852	0.8	0.346412	1.66376e-07	0.733333	0.882938	4.77077e-10	-1.2	0.992121	0.0662518
197876			+	UND	0	-0.0666667	0.115475	0.843961	1	0.711852	1	0.266667	0.832666	4.28472e-09	-0.333333	0.577353	8.24669e-09
197882			+	UND	0	0.133333	0.282843	0.0287163	0.666667	0.489898	6.96243e-07	1.4	1.51877	6.53732e-13	-0.266667	2.16641	1.7584e-05
197883			+	TSS	0	-0.133333	0.774597	0.000686991	4.86667	1.32796	1.47815e-15	4.06667	3.78946	1.54729e-16	-1.2	7.24523	1.14642e-12
197898	\rseP	\+
197915			+	UND	0	0.333333	0.476952	1	0.533333	0.824621	5.75107e-09	0.2	0.87178	2.97362e-09	0.266667	1	6.58996e-09
197919			+	PSS	0	0.266667	0.461882	0.000396137	1.4	0.516398	7.51844e-11	-0.6	0.611193	5.49644e-09	0.933333	0.979796	1.66487e-12
197928	bamA (ecfK, yaeT)	+
197943			+	PSS	0	0.2	0.346412	1	0.933333	1.66446	3.307e-05	0.333333	1.94594	0.000108357	-0.666667	1.83666	0.000281867
197981			+	TSS	0	3.4	2.38476	1.76552e-11	9.6	9.51561	7.40925e-17	5.46667	11.4426	1.21347e-17	5.6	15.8513	8.35243e-18
198100			+	UND	0	0.133333	0.432494	0.0516923	0	0.432494	0.00121972	1.13333	1.13725	1.99404e-05	-0.133333	1.29994	2.32996e-07
198102			+	UND	0	0.0666667	0.115475	1	0.333333	0.416333	0.0106135	1.06667	0.577353	2.14302e-05	-0.266667	0.916515	1.0551e-06
198141			+	TSS	0	0.2	0.516398	0.000312862	0.0666667	0.326599	2.71713e-08	1.8	1.19839	3.46689e-12	-1.2	1.64581	2.88186e-09
198777			+	UND	0	0.133333	0.2	0.00183937	1	1.26323	1.9521e-07	-0.333333	1.95445	5.19977e-09	1.4	1.95619	1.32774e-12
198795			+	UND	0	0.0666667	0.621825	0.0218693	0.133333	0.748331	0.0147715	0.333333	0.723769	1.61614e-08	0.333333	0.642916	4.77205e-11
198909			+	PSS	0	0.8	2.3238	0.000326113	4.93333	4.93423	4.00251e-09	-1.5	4.96488	1.47545e-06	-0.4	5.28772	6.80962e-08
198911			+	UND	0	0.266667	0.588785	0.305834	0.6	1.1755	0.000109064	0.866667	2.13854	4.93788e-09	-1.46667	1.94257	0.0516919
199267			+	UND	0	-0.333333	0.846347	0.545543	0.466667	0.663325	0.000156588	0.2	0.945163	0.000245755	0.2	1.31656	7.01473e-06
199406			+	UND	0	0.333333	0.541626	0.023936	-0.2	0.565685	0.0619236	0.8	0.791623	1.52355e-08	0.8	1.68312	1.58929e-09
199483			+	PSS	0	0.133333	0.115475	1	0.4	0.163299	0.000186528	1	0.938832	4.60848e-07	1.24345e-15	2.19999	8.83768e-05
199490			+	PSS	0	0.266667	0.461882	1	0.733333	0.632456	2.8883e-07	1.93333	0.461882	3.52207e-08	-0.833333	1.3654	1.06809e-09
199555			+	PSS	0	-0.2	0.4	0.0706964	0.733333	0.365148	3.65595e-05	1.66667	0.529153	4.74856e-08	0.0666667	2.99333	2.81468e-07
199634			+	UND	0	-1.9984e-16	0.282843	0.085703	0.4	0.282843	4.64279e-10	0.466667	0.692823	8.16752e-09	0.133333	0.959166	1.38888e-10
199668			+	UND	0	0.0666667	0.346412	0.0780665	1.86667	1.61245	1.5498e-10	-0.9	1.652	1.51883e-11	0.433333	0.842615	1.50155e-09
199748			+	TSS	0	0.6	1.27176	1.08001e-13	9.4	3.45254	4.71803e-18	2.13333	4.73286	1.35118e-17	1.26667	3.78418	1.00699e-17
199809			+	UND	0	0.133333	0.541626	0.0317519	2.26667	2.19999	2.00895e-11	-0.0666667	2.41937	2.93792e-11	0.6	1.81177	2.23903e-14
199988			+	UND	0	0.0666667	0.115475	1	0.133333	0.365148	0.320703	0.533333	0.986577	0.000650865	1.2	0.959166	1.35527e-07
200138			+	UND	0	0.0666667	0.848528	0.0446726	2.13333	3.61599	3.1564e-10	3.06667	3.8	1.47555e-15	-4	2.63565	1.10185e-09
200158			+	UND	0	0.0666667	0.115475	1	0.533333	0.632456	0.000161877	0.8	0.765942	1.08702e-09	-0.333333	0.723769	1.09324e-06
200164			+	UND	0	0.0666667	0.115475	1	0.333333	0.447214	0.000484292	1.06667	0.748331	5.43678e-12	-0.333333	0.8	8.20313e-11
200188			+	UND	0	0.133333	0.163299	1	0.533333	0.541626	1.59275e-06	0.333333	0.739369	6.80114e-11	0.2	0.886942	6.40907e-11
200210			+	UND	0	0.0666667	0.258199	0.568993	1.06667	1.13725	6.76189e-08	1.53333	1.837	1.63256e-13	-0.8	1.8429	1.47427e-12
200211			+	UND	0	0.2	0.382978	0.00106505	1.1	0.675771	1.53325e-10	2.36667	2.39235	5.56758e-14	-0.866667	3.48934	2.54046e-10
200212			+	PSS	0	-0.8	2.98444	2.22971e-15	32.2667	8.38937	3.0337e-20	24.8	22.7395	3.87854e-20	0.8	51.8117	9.90614e-20
200213			+	TSS	0	0.666667	0.966918	3.23133e-09	2.13333	1.22746	8.87157e-16	4.46667	3.31262	2.16479e-16	-0.8	6.57268	4.66709e-15
200214			+	UND	0	-0.133333	0.239418	0.941596	0.6	0.489898	1	0.4	0.621825	3.62663e-09	0.0666667	1.11514	2.19626e-06
200246			+	UND	0	0.0666667	0.239418	0.0033018	0.866667	1.11952	8.48724e-09	0.866667	1.38565	9.66061e-13	0.666667	1.31149	9.21016e-14
200256			+	PSS	0	-0.0666667	0.115475	0.843961	0.533333	0.355546	1	1.4	0.553775	4.08616e-08	-0.133333	0.938832	2.57456e-07
200264			+	TSS	0	-0.2	0.382978	0.880353	0.866667	0.382978	4.41775e-12	1.53333	1.29994	1.69832e-13	-1	1.38821	8.22335e-12
200299			+	UND	0	-0.0666667	1.26323	0.000335622	2.73333	2.22716	1.83442e-14	9.2	4.94638	2.71059e-17	-1.4	6.31323	7.05591e-17
200300			+	UND	0	0.0666667	0.115475	1	0.266667	0.346412	0.000655542	2.4	0.8	2.0394e-14	1.13333	1.65738	3.68763e-14
200301			+	UND	0	-0.0666667	0.115475	0.75679	0.133333	0.163299	1	2.13333	0.365148	1.12608e-13	1.26667	1.83333	1.22737e-11
200303			+	UND	0	0	0	1	0.0666667	0.115475	1	1.46667	0.621825	1.31929e-10	0.866667	1.2	2.65983e-13
200307			+	UND	0	0.133333	0.239418	1	0	0.326599	0.556476	1.13333	0.721113	1.44665e-11	0.466667	1.26323	1.53291e-12
200360	\bamA	\+
200364			+	UND	0	-0.333333	0.326599	1	0.666667	0.432494	1	1.2	1.39235	1.13944e-09	-1	1.51982	9.85602e-07
200377			+	UND	0	-0.0666667	0.115475	0.843961	1.33333	1.66446	1	2.2	2.216	1.23777e-11	-1.4	2.44131	2.75459e-12
200378			+	PSS	0	0.133333	0.282843	0.00175873	1.6	1.16619	2.44158e-10	4.2	2.77128	5.33661e-14	3	6.34496	4.1299e-15
200379			+	UND	0	-0.0666667	0.239418	0.086211	0.0666667	0.365148	0.542078	0.733333	0.856349	1.19762e-06	0.733333	1.17757	2.76462e-11
200476			+	UND	0	0	0	1	0.8	0.663325	1	0.133333	0.832666	4.96277e-09	0.8	1.25963	2.33246e-09
200482	skp	+
200959			+	UND	0	-0.133333	0.365148	0.649445	0.6	0.382978	1.17321e-06	0.866667	1.6	1.38501e-06	0.133333	1.6	1.60798e-12
200960			+	PSS	0	0.2	0.711852	5.10664e-07	3	2.37767	1.2585e-11	2.26667	4.42418	1.4624e-13	3.73333	5.13161	4.32416e-14
200962			+	UND	0	-0.133333	0.239418	0.927578	2.66667	4.54812	1	-2.26667	4.52254	0.000621026	-0.0666667	0.461882	0.00154823
200967	\skp	\+
200971	lpxD	+	+	PSS	0	0	0.163299	0.556828	0.866667	0.282843	1.56956e-07	0.666667	0.732967	8.04103e-08	1.13333	1	1.29539e-12
201081			+	UND	0	0.133333	0.326599	0.0633182	0.4	1.32796	0.0200762	0.666667	1.14395	3.02579e-05	0.666667	0.848528	1.33289e-07
201879			+	UND	0	0.266667	0.355546	1	0.0666667	0.432494	0.0261578	0.666667	0.757188	8.88541e-05	0.333333	1.45626	5.35405e-09
201899			+	UND	0	0.333333	0.489898	0.000888637	0.933333	0.882938	2.03991e-12	0.666667	1.91137	6.24227e-08	0.2	2.22411	8.7715e-13
201996	\lpxD	\+
202066			+	UND	0	0.266667	0.6	0.040814	0.466667	0.723769	2.74171e-07	1.46667	0.848528	8.418e-14	-0.4	1.25963	2.63039e-10
202073			+	TSS	0	-0.266667	1.52315	1.1518e-09	-0.8	0.879394	8.49574e-06	-0.266667	0.476952	0.0865157	0.2	0.516398	0.00243809
202074			+	PSS	0	-0.666667	3.88844	3.75669e-14	-1.93333	3.24345	6.14947e-13	0.466667	1.58746	1.10857e-13	2.06667	3.59412	1.64534e-14
202075			+	TSS	0	-0.133333	3.44122	1.90583e-07	-1.33333	1.62896	4.99646e-05	-0.4	0.553775	0.55019	0.866667	0.99332	1.21234e-08
202101	fabZ	+
202279			+	PSS	0	-0.333333	0.663325	0.101392	0.333333	0.2	0.000300507	0.266667	0.432494	0.000206843	0.266667	0.489898	8.43813e-07
202556	\fabZ	\+
202560	lpxA	+
203348	lpxB \lpxA	+ \+
203797			+	UND	0	0.0666667	0.346412	0.0673853	0	0.553775	0.537724	1.73333	1.23288	1.57109e-12	-0.8	1.18884	1.6077e-09
204493	rnhB	+
204496	\lpxB	\+
204501			+	PSS	0	0.233333	0.428174	0.0232226	0.966667	1.53795	7.1426e-05	0.2	1.72466	2.3589e-05	-0.566667	1.59874	9.87947e-05
205089	\rnhB	\+
205126	dnaE	+
208414			+	UND	0	0.2	0.2	1	0.466667	1.17189	0.393539	0.8	1.89385	0.00397615	-0.0666667	1.9799	1.2469e-06
208415			+	UND	0	-0.2	0.346412	0.966534	0.333333	0.416333	1	0.6	0.588785	8.91778e-05	0.6	0.765942	2.34345e-05
208608	\dnaE	\+
208621	accA	+
208718			+	PSS	0	-0.466667	3.44932	2.74836e-07	-0.466667	2.91244	5.0071e-06	1.26667	2.51661	1.67991e-10	0.866667	4.57967	2.67233e-08
208841			+	PSS	0	-3.1	4.62133	2.18942e-05	-0.5	2.12838	1.02068e-05	0.466667	0.966918	1.37094e-05	0.866667	1.21161	5.37772e-06
208850			+	UND	0	-0.933333	0.879394	0.0446526	0.466667	1.45626	5.62073e-05	-0.333333	0.99332	8.57273e-06	0.133333	0.621825	3.09844e-06
209580	\accA	\+
209679	ldcC	+
211820	\ldcC	\+
211877	yaeR	+
212266	\yaeR	\+
212331	tilS	+
213629	\tilS	\+
213678	rof	-
213925	yaeP	-
213932	\rof	\-
214125	\yaeP	\-
214161			-	TSS	0	-0.8	1.76257	6.25936e-05	-0.666667	0.163299	0.732148	0	0.163299	0.650686	0.266667	0.258199	0.00119666
214291	yaeQ	+
214833	arfB	+
214836	\yaeQ	\+
215255	\arfB	\+
215269	nlpE	+
215979	\nlpE	\+
216179	yaeF	-
217003	\yaeF	\-
217057	proS	-
217202			-	UND	0	1.33333	1.4376	2.07711e-08	-1.93333	1.249	0.00103529	0.933333	1.45622	0.00607179	-0.666667	1.43295	0.000307803
218775	\proS	\-
218887	tsaA	-
219591	rcsF	-
219594	\tsaA	\-
219995	\rcsF	\-
220113	metQ	-
220928	\metQ	\-
220968	metI	-
221614	metN	-
221621	\metI	\-
222645	\metN	\-
222712			-	TSS	0	-0.733333	1.57482	6.27753e-05	-0.533333	1.12546	0.000135842	0.933333	1.59583	5.11595e-07	-0.866667	1.66533	0.0183384
222806			+	UND	0	-2.46667	1.26491	2.05369e-11	-0.466667	0.447214	2.01908e-06	0.666667	1.27176	5.25371e-07	-0.8	1.23288	1.4593e-05
222833	gmhB	+
223408	\gmhB	\+
229167	dkgB	+
229967	yafC	-
229970	\dkgB	\+
230881	\yafC	\-
231122	yafD	+
231922	\yafD	\+
231926	yafE	+
232549	\yafE	\+
232597	mltD	-
233955	\mltD	\-
233978			-	TSS	0	-0.133333	0.611193	3.53447e-06	-0.333333	0.565685	0.000511608	0.133333	0.489898	1.26111e-05	-0.2	0.516398	0.0543824
234027	gloB	-
234782	\gloB	\-
234785			+	TSS	0	-0.533333	1.18884	7.16761e-05	-0.8	0.774597	0.806385	0.0666667	0.258199	0.497536	0.2	0.382978	0.0266922
234816	yafS	+
235535	rnhA	-
235538	\yafS	\+
236002	\rnhA	\-
236021			+	TSS	0	-1.46667	1.55778	2.3134e-06	-0.266667	0.282843	7.9153e-08	6.21725e-16	0.711852	0.470471	0.2	0.791623	7.31282e-06
236067	dnaQ	+
236798	\dnaQ	\+
236909			+	UND	0	6.21725e-16	0.611193	8.90693e-08	-0.133333	0.565685	0.00023722	0.6	0.774597	6.58249e-09	-0.4	0.979796	6.67733e-06
237335	yafT	+
238120	\yafT	\+
238257	ykfM	-
238736	\ykfM	\-
238746	yafU	-
239102	\yafU	\-
239106	yafF	+
239378	\yafF	\+
239419	yafV	-
240189	\yafV	\-
240343	ivy	+
240816	\ivy	\+
240859	fadE	-
243303	\fadE	\-
243512			+	UND	0	-1.06667	4.74271	6.2402e-12	-3.46667	3.2187	0.000292721	0.133333	0.461882	5.38471e-08	1.06667	0.553775	2.03402e-12
243543	gmhA	+
244121	\gmhA	\+
244327	yafJ	+
245065	yafK	-
245094	\yafJ	\+
245805	\yafK	\-
245961	yafQ	-
246239	\yafQ	\-
246242	dinJ	-
246502	\dinJ	\-
246530			-	UND	0	-1.26667	0.846347	0.000234723	1.42109e-15	0.489898	0.000230712	-1.42109e-15	0.663325	0.00084308	-0.0666667	0.489898	2.80103e-05
246531			-	TSS	0	-0.0666667	0.848528	2.16428e-06	-0.466667	0.748331	0.000617306	0.266667	0.461882	0.00032567	0.666667	1.11952	1.44386e-08
246712	yafL	+
247461	\yafL	\+
247637	rayT	+
248134	\rayT	\+
248358	lfhA	-
250070	\lfhA	\-
250072	lafU	+
250827	\lafU	\+
250898	dinB	+
251953	\dinB	\+
252005	yafN	+
252298	\yafN	\+
252301	yafO	+
252699	\yafO	\+
252709	yafP	+
253161	\yafP	\+
253479	ykfJ	+
253685	\ykfJ	\+
253702	prfH	+
254202	\prfH	\+
254259	pepD	-
255716	\pepD	\-
255774			-	UND	0	-0.466667	1.99666	2.99275e-13	-1.6	0.774597	0.00106694	-0.266667	0.258199	1	0.133333	0.163299	1
255805			-	UND	0	-0.933333	1.21655	6.84389e-09	-0.733333	0.8	0.0458468	0.266667	0.588785	0.0118199	-0.333333	0.529153	0.076468
255807			-	UND	0	-1.06667	1.36395	0.00080319	-0.333333	0.489898	0.0917511	0.133333	0.489898	0.544056	6.21725e-16	0.516398	0.0026748
255977	gpt	+
256435	\gpt	\+
256502			+	TSS	0	-1.8	3.76795	1.11762e-07	-0.8	0.846347	0.501337	0.933333	0.711852	1.22349e-07	-0.666667	0.848528	0.0161444
256527	frsA	+
257771	\frsA	\+
257810			+	TSS	0	-7.46667	5.35914	4.42535e-10	-1	1.81177	3.19155e-07	0.8	0.959166	1.18314e-12	2.8	1.8429	5.16456e-12
257829	crl	+
259006	\crl	\+
259045	phoE	-
260100	\phoE	\-
260350			+	TSS	0	-0.666667	0.673333	2.11858e-08	-0.733333	0.432494	1	0.266667	0.365148	1	0.0666667	0.6	0.0496246
260388	proB	+
261491	\proB	\+
261503	proA	+
262756	\proA	\+
263150	ykfN	-
263212	\ykfN	\-
263328	ykfI	-
263669	\ykfI	\-
263690	yafW	-
264007	\yafW	\-
264026	ykfH	-
264247	\ykfH	\-
264256	ykfG	-
264732	\ykfG	\-
264748	yafX	-
265206	\yafX	\-
265304	ykfF	-
265543	\ykfF	\-
265620	ykfB	-
266087	\ykfB	\-
266110	yafY	-
266553	ykfL \yafY	- \-
266774	\ykfL	\-
266776	ykfK	-
266967	\ykfK	\-
267184	yafZ	-
268005	\yafZ	\-
268097	ykfA	-
268960	\ykfA	\-
269289	perR	-
270182	\perR	\-
270278	insN	+
270603	insI1	+
271754	\insI1	\+
272189	\insN	\+
272580	eyeA	+
272654	\eyeA	\+
272847	ykfC	+
273954	\ykfC	\+
274101	insH1	-
275117	\insH1	\-
275325	mmuP	+
276715	mmuM	+
276728	\mmuP	\+
277647	\mmuM	\+
277756	afuC	-
278802	\afuC	\-
278814	afuB	-
279161	\afuB	\-
279178	insB1	-
279600	insA	-
279681	\insB1	\-
279875	\insA	\-
279931	insI1	+
280104	\insI1	\+
280114	insX	-
280362	\insX	\-
280427	yagB	-
280735	\yagB	\-
280829	yagA	-
281983	\yagA	\-
282278	yagE	+
283186	\yagE	\+
283201	yagF	+
285168	\yagF	\+
285395	yagG	+
286777	\yagG	\+
286789	yagH	+
288399	\yagH	\+
288404	yagI	-
289162	\yagI	\-
289301	argF	-
290305	\argF	\-
290429	ykgS	+
290633	\ykgS	\+
290649	insB1	-
291071	insA	-
291152	\insB1	\-
291346	\insA	\-
291404	yagJ	+
292231	\yagJ	\+
292322	yagK	-
292948	\yagK	\-
293220	yagL	-
293918	\yagL	\-
293945	yagM	-
294799	\yagM	\-
295139	yagN	-
295579	\yagN	\-
295696	intF	-
297096	\intF	\-
297381	yagP	-
297714	ykgT	-
297719	\yagP	\-
297770	paoD	-
297791	\ykgT	\-
298726	\paoD	\-
298736	paoC	-
300931	paoB	-
300934	\paoC	\-
301884	paoA	-
301887	\paoB	\-
302573	\paoA	\-
302959			+	TSS	0	-3.33333	2.24499	0.0601114	-0.0666667	0.447214	0.063796	-0.133333	0.282843	0.810864	0.2	0.163299	0.00176722
302991	yagU	+
303605	\yagU	\+
303853	ykgJ	-
304182	\ykgJ	\-
304495	ecpE	-
305174	ecpD	-
305205	\ecpE	\-
306807	ecpC	-
306817	\ecpD	\-
306829			-	TSS	0	1.06667	1.49492	6.25665e-05	-0.933333	1.34667	0.000252605	1	0.824621	2.15707e-05	-0.4	1.7733	7.62805e-05
309332	\ecpC	\-
309358	ecpB	-
310026	\ecpB	\-
310084	ecpA	-
310671	\ecpA	\-
310746	ecpR	-
311336	\ecpR	\-
312112	ykgL	+
312339	\ykgL	\+
312374	ykgO	-
312514	ykgM \ykgO	- \-
312777	\ykgM	\-
313141	ykgR	-
313242	\ykgR	\-
313716	ykgP	-
313805	\ykgP	\-
314357	eaeH	+
315228	\eaeH	\+
315291	insE1	+
315587	insF1	+
315590	\insE1	\+
316453	\insF1	\+
316486	ykgA	-
317169	\ykgA	\-
317439	ykgQ	+
317567	\ykgQ	\+
317726	rclC	-
318319	\rclC	\-
318331	rclB	-
318567	\rclB	\-
318676	rclA	-
320001	\rclA	\-
320227	rclR	+
321081	\rclR	\+
321608	ykgE	+
322327	\ykgE	\+
322338	ykgF	+
323758	ykgG	+
323765	\ykgF	\+
324453	\ykgG	\+
324696	ykgH	-
325364	\ykgH	\-
325577	betA	-
327247	\betA	\-
327261	betB	-
328733	\betB	\-
328747	betI	-
329334	\betI	\-
329359			-	TSS	0	-0.933333	2.86589	6.98444e-10	-0.8	1.31281	5.72968e-07	-0.133333	0.663325	0.00020133	1.2	1.32162	4.30127e-10
329421			+	TSS	0	-1.53333	2.57946	1.5648e-06	-0.466667	0.723769	0.0128448	-0.2	0.489898	0.546705	0.733333	0.416333	4.10199e-05
329463	betT	+
331496	\betT	\+
332371	yahA	+
333459	\yahA	\+
333501	yahB	-
334433	\yahB	\-
334525	yahC	-
335022	\yahC	\-
335280	yahD	+
335885	\yahD	\+
335925	yahE	+
336778	yahF	+
336788	\yahE	\+
338325	yahG \yahF	+ \+
339743	\yahG	\+
340165	yahI	+
341115	\yahI	\+
341125	yahJ	+
342507	\yahJ	\+
342884	yahK	+
343933	\yahK	\+
344176	yahL	+
344991	\yahL	\+
345251			+	TSS	0	-0.533333	1.64581	0.533849	-0.2	0.774597	0.45636	0.0666667	0.461882	0.0461642	0.666667	0.972968	0.000162134
345252			+	TSS	0	-1.66667	4.36348	5.38577e-11	-2.93333	2.55343	0.000187464	2.6	2.7526	1.73805e-08	-0.4	2.74955	8.71562e-08
345254			+	TSS	0	-0.0666667	1.14891	1.4112e-07	-0.666667	0.739369	4.52946e-05	1.13333	1.65328	2.60639e-05	0.333333	1.79258	1.19625e-09
345404	yahM	+
345649	\yahM	\+
345666	yahN	-
346337	\yahN	\-
346484	yahO	+
346759	\yahO	\+
346857	prpR	-
348443	\prpR	\-
348682	prpB	+
349572	\prpB	\+
350012	prpC	+
351181	\prpC	\+
351215	prpD	+
352666	\prpD	\+
352706	prpE	+
354592	\prpE	\+
354922	codB	+
356171	codA	+
356181	\codB	\+
357454	\codA	\+
357791	cynR	-
358690	\cynR	\-
358799	cynT	+
359458	\cynT	\+
359489	cynS	+
359959	\cynS	\+
359992	cynX	+
361146	\cynX	\+
361249	lacA	-
361860	\lacA	\-
361926	lacY	-
363179	\lacY	\-
363231	lacZ	-
366305	\lacZ	\-
366428	lacI	-
366477			-	PSS	0	0.4	0.979796	0.000667421	-0.0666667	0.939493	8.69711e-05	-0.533333	0.2	0.116577	0.6	0.529153	0.000273481
367472			-	TSS	0	0.6	0.4	1	0.666667	0.882938	3.32213e-08	0.0666667	1.89342	3.29521e-05	1.33333	1.77388	8.15483e-10
367510	\lacI	\-
367535			-	TSS	0	-1.56667	2.88386	6.35494e-08	-2.06667	1.11952	0.00153788	0.666667	1.45626	9.61944e-06	0.866667	2.25979	1.0234e-06
367536			-	TSS	0	-12.2667	34.9521	4.91716e-16	-22.9667	21.6875	1.56412e-07	2.76667	6.19967	6.99396e-10	5.13333	13.5372	3.01579e-11
367537			-	TSS	0	-2.26667	5.46169	1.37024e-15	-4.53333	3.83288	7.80732e-12	3.2	1.59967	1.67981e-12	1.46667	4.27776	8.89281e-12
367539			-	TSS	0	0.266667	1.16619	6.27753e-05	-1.06667	0.986577	1	0.0666667	0.115475	1	0.866667	0.846347	0.00478701
367587	mhpR	-
368420	\mhpR	\-
368611	mhpA	+
370275	\mhpA	\+
370277	mhpB	+
371221	\mhpB	\+
371239	mhpC	+
372105	\mhpC	\+
372115	mhpD	+
372921	mhpF	+
372924	\mhpD	\+
373868	mhpE	+
373871	\mhpF	\+
374881	\mhpE	\+
375459	mhpT	+
376670	\mhpT	\+
376772	yaiL	+
377311	\yaiL	\+
377535	frmB	-
378368	\frmB	\-
378462	frmA	-
379571	\frmA	\-
379606	frmR	-
379881	\frmR	\-
380069	yaiO	-
380842	\yaiO	\-
380844	yaiX	-
381323			+	TSS	0	-0.755556	0.466758	1	0.0666667	0.145297	1	-0.133333	0.159862	1	0.277778	0.463814	1
381351	insC1	+
381674	insD1	+
381716	\insC1	\+
382579	\insD1	\+
382739	yaiP	-
382872	\yaiX	\-
383935	\yaiP	\-
384059	yaiS	-
384616	\yaiS	\-
385232	tauA	+
386194	\tauA	\+
386207	tauB	+
386971	tauC	+
386974	\tauB	\+
387795	tauD	+
387798	\tauC	\+
388646	\tauD	\+
388753	hemB	-
389727	\hemB	\-
389752			-	TSS	0	0.0666667	1.49666	6.74659e-10	-1.26667	1.7733	0.00949423	-0.0666667	0.791623	0.000544069	0.6	1.13246	1.62181e-06
390251	yaiT	+
391739	insF1	-
392602	insE1	-
392605	\insF1	\-
392901	\insE1	\-
394418	\yaiT	\+
394506	yaiV	+
395129	\yaiV	\+
395130	ampH	-
396287	\ampH	\-
396553			+	UND	0	0.466667	0.533223	1	-0.133333	0.6	0.000937987	0.333333	0.632456	0.000114609	0.933333	1.66533	5.72674e-09
396554			+	TSS	0	15.4	11.7864	1	-7.6	12.8369	3.84888e-16	26.2	26.2563	2.79057e-14	19.8667	55.9785	3.21736e-18
396556			+	UND	0	0.4	0.258199	1	-0.0666667	0.416333	0.00114114	2.13333	1.78875	1.4687e-08	0.0666667	1.96977	1.21175e-13
396639	sbmA	+
397237			+	PSS	0	0.933333	0.9185	1	1.6	1.89342	2.50758e-06	1.46667	2.33356	2.2733e-06	-1.8	2.97618	9.67422e-06
397830			+	UND	0	0.133333	0.239418	1	1.06667	1.33167	0.00298154	0.866667	1.7512	7.37295e-08	0.133333	1.68312	3.18086e-08
397859	\sbmA	\+
397872	yaiW	+
398966	\yaiW	\+
399025	yaiY	-
399333	\yaiY	\-
399593	yaiZ	+
399805	\yaiZ	\+
399829	ddlA	-
400923	\ddlA	\-
401363			+	UND	0	-1.26667	2.84956	2.50583e-05	-1.4	1.25963	0.0425499	1.93333	1.39444	2.75283e-08	1.86667	3.41174	2.24978e-10
401386	iraP	+
401646	\iraP	\+
401747	phoA	+
403162	\phoA	\+
403281	psiF	+
403601	\psiF	\+
403703	yaiC	+
404818	\yaiC	\+
404835	proC	-
405644	\proC	\-
405684			-	TSS	0	-3.2	3.2414	6.71845e-06	-6.21725e-16	0.846347	0.405395	0.133333	0.894427	7.1533e-08	0.533333	0.757188	9.65811e-09
405764	yaiI	+
406222	\yaiI	\+
406405	aroL	+
406929	\aroL	\+
406979	yaiA	+
407170	\yaiA	\+
407428	aroM	+
408105	\aroM	\+
408148			+	TSS	0	-2.4	2.53587	5.46967e-05	-0.466667	0.541626	0.000336059	0.266667	0.541626	5.61409e-06	0.133333	0.461882	7.68907e-05
408177	yaiE	+
408461	\yaiE	\+
408609	ykiA	+
408950	\ykiA	\+
409108	rdgC	-
410019	\rdgC	\-
410144	mak	+
411052	\mak	\+
411297	araJ	-
412481	\araJ	\-
412607	sbcC	-
415750	sbcD	-
415753	\sbcC	\-
416952	\sbcD	\-
417142	phoB	+
417240			+	UND	0	1.26667	0.986577	1	3.6	2.32953	4.87756e-16	3.46667	2.79285	8.35329e-17	1.93333	4.49444	9.44359e-17
417241			+	UND	0	1.6	0.824621	1	2	1.55778	1.70843e-15	2.6	1.91485	4.74363e-16	1.6	3.23728	6.45563e-16
417831	\phoB	\+
417889	phoR	+
419184	\phoR	\+
419591	brnQ	+
420910	\brnQ	\+
420986	proY	+
422359	\proY	\+
422518	malZ	+
424332	\malZ	\+
424337	acpH	-
424918	\acpH	\-
425011	queA	+
426081	\queA	\+
426137	tgt	+
427203			+	UND	0	-1.73333	2.55343	2.75965e-12	-1.46667	1.249	0.0198186	-0.333333	0.416333	0.999996	0.333333	0.416333	1
427204			+	TSS	0	-4	13.4238	2.42379e-17	-10.1333	9.47699	1.37352e-11	0.266667	2.75923	3.80351e-14	0.4	2.98664	1.66024e-13
427205			+	TSS	0	-1.06667	2.17256	2.53739e-13	-1.26667	1.21161	7.23798e-05	0.133333	0.721113	1.29931e-08	-0.333333	0.748331	0.0409237
427215			+	UND	0	-0.133333	2.82135	8.82781e-07	-1.13333	2.13965	0.0001815	-0.466667	0.476952	0.868084	0.2	0.282843	0.00228447
427216			+	UND	0	0.266667	1.87617	5.06667e-05	-1.33333	1.57482	0.0943347	1.9984e-16	0.282843	0.714513	0.133333	0.346412	0.00322081
427264	\tgt	\+
427287	yajC	+
427619	\yajC	\+
427647	secD	+
427658			+	UND	0	-0.4	1.9799	0.0266926	-0.466667	1.34667	0.500046	-0.2	0.621825	0.645995	0.4	0.476952	0.000625965
427659			+	PSS	0	-0.266667	3.19126	8.03638e-05	-1.13333	2.17868	0.0232907	0.0666667	0.783157	0.000276371	0.4	1.41421	0.0153403
427660			+	PSS	0	-1	1.52362	3.03021e-09	-5.26667	7.24628	5.48258e-05	0.333333	0.9185	7.19925e-05	1.4	3.65942	1.92805e-05
429494	\secD	\+
429505	secF	+
430476	\secF	\+
430576			+	PSS	0	-1.2	1.12546	0.000312223	0	0.326599	0.000193898	-1.42109e-15	0.824621	0.0290129	0.2	1.14891	0.0162093
430605	yajD	+
430952	\yajD	\+
431129	tsx	-
432013	\tsx	\-
432050			-	UND	0	-3.2	4.28486	0.000115531	-0.666667	0.355546	1	0.0666667	0.115475	1	-0.0666667	0.115475	0.82294
432076			-	UND	0	-2.6	2.72519	3.43797e-06	-0.733333	0.732967	1	0	0	1	0.0666667	0.115475	1
432088			-	TSS	0	-12.1333	6.15467	1.55879e-10	-2.33333	0.916515	0.846405	0.133333	0.2	0.00201462	0.733333	0.673333	1.98668e-06
432089			-	TSS	0	-36.5333	23.6863	8.34242e-15	-3.93333	3.11769	0.0136011	6.21725e-16	0.791623	0.000972149	2.33333	0.938832	8.16761e-08
432090			-	TSS	0	-2.6	1.92528	0.000409967	-0.6	0.721113	1	0.0666667	0.115475	1	0.333333	0.365148	0.0154545
432091			-	TSS	0	-5.8	4.82483	4.9005e-09	-1.06667	0.553775	0.806387	0	0.163299	0.612844	0.933333	0.541626	2.80949e-05
432312	yajI	-
432851	\yajI	\-
432975			+	UND	0	-2.2	2.66556	7.81267e-05	-0.466667	0.611193	0.0167402	0.266667	0.533223	0.000312623	0.933333	1.7359	5.797e-05
433002	nrdR	+
433451	\nrdR	\+
433455	ribD	+
434504			+	TSS	0	-0.666667	0.723769	1	0	0	1	0.933333	0.432494	1	0.2	0.848528	1.01149e-10
434511			+	PSS	0	0.933333	2.17138	5.61015e-13	-1.6	2.15969	6.32686e-07	2.2	2.65591	1.13966e-10	-1.33333	2.37487	3.68114e-11
434558	\ribD	\+
434593			+	UND	0	-0.8	0.886942	5.22366e-05	-0.8	0.476952	0.846404	0.0666667	0.163299	0.0718505	0.533333	0.99332	0.037597
434647	ribE	+
435117	\ribE	\+
435137	nusB	+
435556	\nusB	\+
435634	thiL	+
436589	pgpA	+
436611	\thiL	\+
437107	\pgpA	\+
437161	yajO	-
437429			-	UND	0	0.8	0.938832	1	-0.2	1.89342	0.000138538	0.2	0.723769	1.36305e-08	1.06667	0.611193	1.79044e-09
438135	\yajO	\-
438162			+	TSS	0	-0.716667	0.676387	2.21019e-05	-0.966667	0.251661	0.0501171	0.227778	0.294549	1.86867e-05	-0.227778	0.336788	0.0708814
438315	dxs	-
440177	\dxs	\-
440202	ispA	-
441101	xseB \ispA	- \-
441343	\xseB	\-
441371			-	UND	0	-1.66667	1.31656	6.10053e-05	-0.0666667	0.258199	0.0403322	0.0666667	0.355546	0.00218907	0.266667	0.476952	1.30462e-05
441549	thiI	+
442997	\thiI	\+
443051	yajL	-
443604	panE	-
443641	\yajL	\-
444515	\panE	\-
444558			-	UND	0	-1	2.7526	5.19546e-12	-1	0.432494	0.634687	0.333333	0.529153	0.000603788	-0.133333	0.489898	0.00232689
444658			+	UND	0	-3.6	4.27831	8.03322e-15	-4.66667	3.44932	7.27198e-07	-0.0666667	0.4	1.23585e-09	0.4	0.765942	2.96408e-08
444683	yajQ	+
445174	\yajQ	\+
445302	yajR	-
446666	\yajR	\-
446685			-	TSS	0	-2.4	4.11663	4.93461e-08	-1.93333	1.54919	4.52946e-05	0.733333	1.39235	5.3584e-07	-0.266667	1.38565	6.6873e-05
446815	cyoE	-
447387			-	UND	0	-1.33333	1.19839	0.0013031	-0.133333	0.258199	0.0761027	0.0666667	0.2	0.00396119	0.0666667	0.282843	0.00318701
447705	\cyoE	\-
447717	cyoD	-
448046	cyoC \cyoD	- \-
448547			-	UND	0	-0.733333	1.17189	0.533599	0.133333	0.856349	0.0115218	-0.4	0.553775	0.720849	0.133333	0.382978	0.0693141
448648			-	UND	0	-1.2	2.31517	0.00071026	-0.466667	0.621825	0.846382	0.2	0.326599	0.0328112	0.133333	0.461882	0.00262474
448650	cyoB	-
448660	\cyoC	\-
450641	\cyoB	\-
450663	cyoA	-
451610	\cyoA	\-
451616			+	UND	0	1.26667	1.66446	1	-0.466667	1.23288	9.769e-05	0.733333	0.774597	1.73702e-11	0.266667	0.966918	1.42624e-05
451622			-	UND	0	0.266667	1.14891	8.34492e-07	0.2	1.99666	0.00587294	0.4	1.97878	1.48578e-07	-0.733333	0.894427	7.71793e-05
451632			-	PSS	0	-8.4	15.9357	6.98398e-07	-4.8	4.89762	0.00962192	-0.4	1.53188	0.000220852	0.133333	0.577353	0.000180414
451650			-	TSS	0	0.0666667	0.945163	8.10164e-07	-0.8	0.886942	0.000394638	0.8	0.824621	4.26692e-05	-0.733333	0.783157	0.000686173
451651			-	TSS	0	-12.6333	17.9762	3.63217e-18	-9.8	9.12287	2.33531e-17	1.13333	3.36652	2.31751e-16	-1.42109e-14	3.18748	6.34828e-16
451653			-	TSS	0	-1.13333	1.41892	2.49343e-09	-0.133333	0.516398	8.03238e-10	-0.4	0.588785	9.0169e-06	0.133333	0.553775	1.20159e-07
452070	ampG	-
453545	\ampG	\-
453589	yajG	-
454167	\yajG	\-
454423			+	TSS	0	-1.13333	1.59967	7.49467e-05	-0.933333	0.99332	0.0167402	0	0.432494	0.0341295	0.533333	1.36626	0.028207
454434			+	TSS	0	-1.26667	2.58652	0.000439361	-1	1.38565	1	0.133333	0.239418	1	-0.133333	0.239418	0.93649
454472	bolA	+
454789	\bolA	\+
454992			+	PSS	0	0.333333	1.7127	4.54719e-05	-0.733333	1.66533	0.00760004	6.21725e-16	0.992121	1.16871e-05	0.333333	0.938832	1.54797e-06
454993			+	PSS	0	-6.9	26.7636	6.18727e-19	-20.8667	25.4157	9.92646e-18	2.2	7.21942	4.085e-17	1.4	16.1365	1.00381e-16
454994			+	PSS	0	-0.2	5.57375	2.68558e-16	-4.06667	5.3963	2.68994e-15	-0.466667	1.249	3.29212e-13	1.53333	4.83322	1.02714e-11
454995			+	UND	0	0.266667	5.24976	3.52649e-16	-2.73333	5.49667	2.44692e-15	-1.3	3.19844	1.00776e-14	-0.0666667	3.34542	3.31933e-13
454996			+	UND	0	0.2	0.848528	1.30542e-05	-1.33333	0.632456	0.049332	0.0666667	0.447214	0.0667627	-0.133333	0.4	0.147795
455004			+	TSS	0	-1	0.683135	0.0674429	0	0.432494	0.0542832	0.133333	0.533223	0.031841	-0.2	0.476952	0.129304
455133	tig	+
456431	\tig	\+
456554			+	UND	0	-1.46667	0.721113	0.863383	0.2	0.382978	0.0259354	0.0666667	0.553775	0.0349169	0.333333	0.476952	1.5285e-09
456577			+	UND	0	-2.53333	1.7359	1.31268e-06	-0.6	0.739369	0.048387	0.2	0.432494	1.52402e-05	0.266667	0.692823	1.49736e-07
456604			+	UND	0	-0.133333	0.516398	0.070581	-0.0666667	0.382978	0.0388832	1.13333	1.39444	7.56547e-07	0.0666667	1.89737	4.53534e-09
456605			+	TSS	0	-5.26667	4.76235	1.55557e-11	-1.93333	2.95296	1.92894e-11	11.6667	3.8833	7.10673e-17	6.53333	15.8493	2.8497e-17
456606			+	UND	0	-0.466667	0.365148	0.742636	0.0666667	0.355546	0.027188	0.333333	0.783157	0.0260554	0.8	0.816497	1.53081e-07
456677	clpP	+
457120			+	PSS	0	-0.666667	0.923764	6.54411e-05	-0.533333	0.239418	0.0622945	1.53333	0.673333	1.4495e-05	-0.133333	1.46969	1.01166e-06
457121			+	UND	0	-0.133333	0.382978	0.646829	0.0666667	0.416333	0.44006	0.333333	0.611193	0.0143951	0.866667	0.945163	3.59233e-05
457199			+	UND	0	0.2	0.258199	1	1	0.588785	9.94856e-06	1.26667	1.18884	6.69327e-08	1.2	4.32494	2.38034e-08
457200			+	UND	0	0.666667	0.588785	1	1.2	0.966918	5.90265e-14	1.46667	2.14787	4.07285e-13	1.2	3.86954	2.35781e-14
457201			+	TSS	0	3.4	0.886942	1	4.46667	2.88613	3.94659e-17	6.86667	4.63897	1.50473e-17	7.53333	14.8553	9.78494e-18
457202			+	TSS	0	21	9.44387	1.70753e-18	49.0667	22.176	2.19983e-21	63.8	36.4879	1.03351e-21	50.7333	126.955	4.93941e-22
457203			+	TSS	0	11.2667	4.33196	2.80823e-17	8.6	6.66533	4.73854e-19	10.4667	8.17679	1.07408e-18	22.4	36.2859	2.82198e-19
457204			+	UND	0	0.266667	0.282843	0.000485827	1.8	0.6	2.0368e-14	1	0.894427	9.61436e-15	5.66667	4.61449	2.1031e-16
457208			+	PSS	0	0.2	0.2	1	1.06667	0.856349	1.08959e-07	1.53333	1.66446	3.24702e-13	2	3.94968	6.45953e-09
457209			+	UND	0	0.133333	0.115475	1	0.4	0.432494	3.06168e-06	0.4	0.516398	6.94481e-05	1.06667	1.64924	2.21217e-07
457235			+	TSS	0	0.666667	0.541626	2.27882e-07	-0.466667	0.533223	0.000209424	0.333333	0.721113	2.08764e-06	1.2	1.79258	3.26961e-09
457300	\clpP	\+
457365			+	UND	0	0.4	0.163299	0.000162893	0.133333	0.541626	0.0102883	0.8	1.85472	0.00738582	-0.866667	1.83666	0.0188655
457405			+	UND	0	0.133333	0.115475	1	0.866667	0.663325	2.01337e-07	0.0666667	1.66446	1.24904e-08	-0.333333	0.959166	0.000179448
457416			+	PSS	0	0	0.2	0.00468024	0.666667	0.757188	0.00526556	1.26667	1.55778	1.3563e-05	-0.8	1.63299	5.91555e-05
457417			+	PSS	0	0	0.282843	0.0698602	0.8	0.282843	2.53347e-05	0.333333	0.541626	2.53974e-05	2.53333	0.711852	2.3779e-06
457426	clpX	+
457579			+	UND	0	-0.4	0.621825	0.142213	1.73333	1.59583	4.45209e-08	-0.866667	1.79258	1.16816e-06	2.4	1.47874	5.99893e-13
457904			+	UND	0	0.333333	0.355546	1	0.6	0.553775	1.74293e-07	0.0666667	0.732967	1.16585e-08	0.4	1.46516	2.44514e-07
457906			+	UND	0	1.13333	1.95445	2.98445e-07	-0.333333	1.32162	2.34501e-07	1.26667	1.14891	2.1904e-13	1.6	3.64513	9.39582e-14
457907			+	UND	0	0.2	0.516398	0.0298355	0.266667	0.632456	8.5179e-07	0.4	0.553775	5.81234e-07	1.06667	1.94936	1.35151e-11
457909			+	UND	0	1.86667	1.33167	4.76942e-14	2.26667	1.93218	2.71943e-16	0.866667	2.33239	7.70955e-16	4.53333	5.42486	8.45648e-17
458302			+	PSS	0	-0.133333	2.14165	2.67328e-05	0.266667	1.92185	2.3902e-05	2.46667	2.85424	9.8614e-09	-1.86667	3.24346	1.13111e-05
458312			+	UND	0	0.0666667	0.258199	0.454163	0.133333	0.516398	0.364821	1.13333	0.894427	2.57496e-07	-0.4	1.73973	0.028732
458363			+	TSS	0	-0.0666667	0.577353	0.460463	0.8	1.24366	6.34152e-05	0.466667	1.78139	3.95391e-05	-0.333333	1.37114	4.36837e-09
458364			+	TSS	0	0.4	1.19443	5.2488e-09	0.533333	1.26491	1.24008e-08	1.8	1.35647	4.78112e-09	-0.8	1.99666	2.37935e-10
458369			+	PSS	0	0.133333	0.355546	0.0311795	0.4	0.87178	3.22858e-06	0.466667	0.846347	3.22637e-05	0.133333	1.28582	7.53225e-05
458370			+	UND	0	0.133333	0.326599	0.0633182	0.133333	0.489898	0.000492586	0.266667	0.6	0.00032585	0.6	1.29994	0.000184518
458373			+	TSS	0	0.6	1.7733	2.75273e-06	0.133333	1.48324	4.07201e-07	1	1.66933	7.61886e-11	0.666667	1.68312	8.70233e-14
458387			+	UND	0	0.333333	0.326599	1	0.6	0.632456	5.31546e-09	0.6	0.848528	2.61332e-12	-1.06667	0.882938	0.00176966
458700	\clpX	\+
458768			+	PSS	0	0	0.163299	0.556828	0.933333	0.416333	1.82331e-05	-0.2	0.529153	0.000138387	0.8	1.93972	8.42893e-05
458811			+	UND	0	-1.66667	1.62488	4.54546e-06	-0.6	0.692823	0.117268	1.53333	1.31656	6.93669e-12	1.53333	3.19792	5.42907e-11
458812			+	UND	0	-0.333333	0.565685	0.00214099	-0.0666667	0.416333	0.537016	0.6	0.721113	1.64621e-06	0.8	2.24223	2.64347e-06
458813			+	TSS	0	-19	18.5652	5.91908e-17	-8	7.38286	1.0287e-12	18.9333	7.54999	1.74023e-18	10.2667	29.9838	4.70279e-18
458815			+	UND	0	-1.13333	1.7982	0.00139312	-0.133333	0.721113	0.0241284	-0.266667	0.489898	0.866861	0.333333	0.6	0.0346759
458817			+	PSS	0	0.133333	0.163299	0.00259872	0.8	0.992121	6.21898e-05	-0.266667	1.15475	0.000288086	0.466667	1.33167	2.17326e-06
458818			+	PSS	0	0.133333	0.533223	0.000610659	1.8	1.81177	1.18617e-05	0.4	1.89737	4.87995e-06	1.66667	3.22827	4.05283e-08
458888	lon	+
461242	\lon	\+
461332			+	TSS	0	-7.6	3.92938	6.93993e-13	-2.4	1.249	0.634687	-1.9984e-16	0.282843	0.102797	0.733333	0.848528	0.000232456
461391			+	TSS	0	-1.8	2.57946	4.90005e-06	-0.666667	0.588785	1	0	0	1	0.4	0.258199	1
461395			+	TSS	0	-12.1333	31.122	1.81559e-17	-18.6	1.47913	2.55921e-16	4.66667	5.73876	4.66183e-16	-5.8	5.76657	6.73973e-10
461413			+	UND	0	-0.4	1.83251	2.83357e-06	-0.6	1.45626	0.000790747	-0.0666667	0.541626	0.00191524	0	0.577353	0.0773329
461430			+	UND	0	-1	1.58352	6.87965e-10	-0.466667	0.992121	0.0144604	-0.333333	0.848528	3.52741e-05	0.0666667	0.382978	0.001897
461431			+	PSS	0	-0.4	1.45144	7.25738e-11	-1.53333	1.12546	4.00566e-07	-0.133333	0.879394	0.00020429	0.933333	1.64581	9.48379e-08
461432			+	TSS	0	-2.73333	2.86589	8.2937e-07	-0.533333	2.23385	1.11142e-09	-0.466667	0.848528	1.55345e-06	1.2	1.26323	1.18809e-12
461433			+	UND	0	-0.0666667	1.11514	6.18695e-05	-0.466667	0.732967	1.46986e-05	6.21725e-16	0.258199	0.00153881	0.333333	0.663325	0.000213998
461451	hupB	+
461544			+	UND	0	0.733333	0.783157	8.65862e-07	-0.933333	0.757188	1	1	0.692823	1	-0.2	1.4	0.0296183
461723	\hupB	\+
461852			+	TSS	0	-0.6	1.43295	1.95361e-08	-0.533333	0.663325	0.000168725	-0.133333	0.432494	0.00136794	0.266667	0.447214	9.81313e-06
461915	ppiD	+
463786	\ppiD	\+	+	UND	0	0.6	1.32796	0.000226481	-0.533333	1.14395	0.501331	0.266667	0.673333	0.000296069	0.0666667	0.783157	0.0178667
463937	ybaV	+
464308	\ybaV	\+
464402	fadM	+
464800	\fadM	\+
464852	queC	-
465547	\queC	\-
465612	ybaE	-
467312	\ybaE	\-
467412	cof	+
468136			+	PSS	0	-0.4	2.2	2.37991e-08	-1.4	1.33167	2.22631e-07	1.53333	1.83666	3.65437e-08	1	2.81666	2.81591e-13
468138			+	PSS	0	-0.333333	2.13289	1.77208e-10	-0.8	0.541626	1.62307e-07	0.2	1.12546	5.57507e-05	3.6	1.57563	1.38703e-08
468230	\cof	\+
468383	ybaO	+
468841	\ybaO	\+
468871	mdlA	+
470636	mdlB	+
470643	\mdlA	\+
472417	\mdlB	\+
472598	glnK	+
472936	\glnK	\+
472966	amtB	+
474252	\amtB	\+
474301	tesB	-
475161	\tesB	\-
475199			-	TSS	0	-1.86667	1.38821	6.4227e-07	-0.333333	1.11514	0.00021591	0.266667	1.11514	2.00138e-06	-0.333333	0.894427	0.000561223
475379	ybaY	+
475951	\ybaY	\+
475982	ybaZ	-
476371	\ybaZ	\-
476446			+	UND	0	-0.466667	1.45622	3.26447e-10	-0.266667	0.824621	3.19603e-06	-0.266667	0.663325	0.0364219	0.133333	0.683135	0.00206695
476447			+	UND	0	-1.4	3.61478	8.42493e-14	-1.2	2.44677	6.36674e-13	0.666667	2.53587	1.28615e-08	0.733333	3.14749	7.41538e-14
476448	ffs	+	+	TSS	0	-46.3	124.299	2.7228e-21	-11.9333	76.5935	4.05835e-21	6.13333	86.2447	1.31294e-20	-36.2	66.399	2.5118e-19
476449			+	UND	0	0.133333	0.282843	1.74684e-06	0.266667	0.832666	9.94251e-07	-0.466667	0.856349	2.90168e-05	0.133333	0.529153	0.000306821
476450			+	TSS	0	0.233333	6.99262	2.16602e-12	-4.03333	5.97815	3.57985e-10	1.6	3.53817	7.26055e-14	2.4	8.64216	1.47744e-12
476451			+	PSS	0	-0.733333	1.23288	0.000662577	0.6	0.577353	3.17789e-07	-0.0666667	0.692823	9.78818e-05	0.333333	0.938832	5.01574e-07
476452			+	UND	0	-0.0666667	0.87178	0.0372276	-0.133333	0.663325	0.0545714	0.333333	0.461882	0.000392986	6.21725e-16	0.683135	2.78359e-05
476453			+	PSS	0	-1.2	3.11769	1.0161e-07	-0.0666667	1.75499	4.92837e-06	0.4	0.816497	2.84217e-08	0.933333	3.29242	1.12349e-07
476454			+	PSS	0	-1.13333	12.3822	2.42811e-09	-2.46667	6.99895	1.00147e-11	2.66667	4.36513	4.27016e-07	4	14.9144	4.64868e-11
476456			+	UND	0	0.266667	0.966918	0.0138273	-0.266667	0.87178	1.14717e-05	0.4	0.4	1.37168e-08	0.2	0.416333	1.14352e-10
476457			+	UND	0	-0.6	0.553775	1.35565e-05	-0.333333	0.282843	0.770272	0.4	0.382978	9.3434e-06	0.133333	0.541626	0.000582829
476471			+	PSS	0	0.466667	1.45622	4.22781e-10	-1.4	1.51877	0.0246564	0.533333	1.36395	3.00678e-06	-0.133333	1.11355	1.07575e-06
476472			+	UND	0	0.866667	1.36137	1.269e-07	-1.13333	1.18322	0.117268	0.4	0.533223	1.60966e-05	-0.0666667	0.529153	2.53383e-07
476473			+	UND	0	10	11.9978	7.00705e-15	-9.93333	12.2222	7.49937e-10	0.2	1.64924	3.28077e-09	0.6	1.36395	1.69303e-12
476517			+	UND	0	0.666667	0.642916	2.93192e-09	0.133333	0.832666	2.19591e-09	-0.4	1.1755	9.06707e-06	1.06667	1.67333	2.77438e-11
476518			+	PSS	0	1.06667	1.24194	1.04231e-13	-3.8	11.975	1.19321e-14	8.86667	14.7788	3.93809e-15	-1.6	16.5227	9.07783e-13
476519			+	UND	0	0	0.939493	1.79061e-08	-0.266667	0.732967	9.03795e-05	0.2	0.816497	4.16166e-08	-0.4	0.723769	3.90449e-05
476521			+	UND	0	-0.2	0.711852	9.79876e-08	-0.533333	0.346412	0.783682	0.0666667	0.2	0.075306	0.8	0.692823	3.31996e-08
476522			+	UND	0	0.133333	1.11952	3.16274e-06	-0.4	0.959166	0.0137369	-0.2	0.621825	0.562656	1.2	1.26491	1.37419e-07
476527			+	UND	0	-0.333333	0.577353	0.555915	0.533333	0.588785	4.56152e-07	-0.133333	0.723769	4.51611e-06	0.2	0.757188	1.69663e-06
476528			+	UND	0	0.6	0.879394	0.000233773	-0.0666667	1.16619	8.70864e-05	-1.42109e-15	0.8	2.13819e-06	-0.2	0.489898	1.27043e-05
476561	\ffs	\+
476672	ybaA	+
477025	\ybaA	\+
477067	ylaB	-
478617	\ylaB	\-
478781	ylaC	-
479251	\ylaC	\-
479286			-	PSS	0	-0.533333	2.97993	2.60897e-11	-0.933333	1.59583	8.90682e-11	0.666667	2.52455	1.39183e-07	0.4	2.62298	2.09463e-13
479367	maa	-
479918	\maa	\-
479942			-	TSS	0	-3.2	3.65148	3.65092e-06	-0.6	0.516398	1	0.166667	0.288675	1	0.7	0.747458	7.13656e-05
480090	hha	-
480308	\hha	\-
480334	tomB	-
480421			-	TSS	0	-2.2	2.93315	1.70604e-13	-2.06667	1.43295	0.0171533	0.333333	0.765942	1.85382e-06	0.866667	1.1646	1.3776e-11
480708	\tomB	\-
480793			-	UND	0	-1	2.66556	0.00016237	-0.533333	0.115475	1	0.2	0.2	1	0.4	0.748331	0.018129
481254	acrB	-
484350			-	PSS	0	0.333333	1.16619	1.6754e-10	-1.13333	0.8	8.11664e-06	0.3	0.59168	2.92776e-08	0.1	0.776745	8.42891e-08
484352			-	UND	0	-0.333333	0.489898	2.13782e-06	-0.2	0.432494	0.0226106	-0.333333	0.416333	0.832366	0.0666667	0.258199	0.489996
484403	\acrB	\-
484426	acrA	-
485619	\acrA	\-
485697			-	UND	0	-0.733333	1.27176	4.57544e-05	-0.866667	0.642916	0.596257	0.266667	0.461882	0.0211138	-0.266667	0.461882	0.76476
485761	acrR	+
486408	\acrR	\+
486536	mscK	+
489898	\mscK	\+
490110	ybaM	-
490271	\ybaM	\-
490285	priC	-
490812	\priC	\-
490882	ybaN	+
491259	\ybaN	\+
491412	apt	+
491963	\apt	\+
492055			+	UND	0	-0.8	2.25926	4.22708e-05	-0.8	1.35154	0.000121934	0.466667	0.774597	9.10928e-11	0.0666667	0.986577	9.11136e-07
492056			+	UND	0	-0.2	0.864988	3.94519e-08	0	0.816497	0.000116468	-0.266667	0.748331	1.78325e-05	0.0666667	0.4	0.00070953
492092	dnaX	+
493708			+	UND	0	0.4	0.516398	1	3.33333	2.51661	1.24313e-12	3.4	3.23728	2.85118e-16	-0.666667	4.16493	4.21586e-15
493909			+	PSS	0	0.333333	1.29615	1.5094e-07	-0.466667	0.692823	9.89447e-07	-0.133333	0.565685	4.63575e-06	-6.21725e-16	0.553775	0.000444463
494023	\dnaX	\+
494051			+	PSS	0	-0.866667	1.95445	0.000158651	1.06667	1.4376	2.19349e-08	0.866667	2.99333	1.17984e-07	-1.2	3.27822	0.000342779
494052			+	UND	0	-0.4	0.938832	5.40519e-06	0.6	0.945163	5.67667e-07	-0.2	1.45622	0.00981723	-0.0666667	1.27548	0.000266343
494076	ybaB	+
494405	recR \ybaB	+ \+
495010	\recR	\+
495076			+	TSS	0	-6.4	11.2422	3.87521e-16	-4.93333	2.92826	5.00827e-10	12.4667	4.64184	2.08802e-17	7.6	13.7928	7.42297e-18
495082			+	PSS	0	-2	2.64575	1.88351e-05	-0.8	0.447214	0.000650921	1.6	1.23288	1.51478e-05	2.4	2.74226	2.56573e-06
495083			+	PSS	0	-4.2	3.81925	1.87078e-05	-0.866667	0.732967	0.016914	3.6	2.62298	3.05176e-06	2.46667	5.72833	1.36602e-06
495084			+	PSS	0	-1.8	1.92528	0.00349955	-1.13333	1.55778	0.0425034	2.13333	0.683135	5.98382e-08	2.73333	4.53578	1.93495e-06
495090			+	PSS	0	-0.733333	1.45626	8.83215e-10	-1	0.824621	0.000406883	1.06667	0.432494	1.61877e-05	3.53333	4.18887	2.04634e-08
495091			+	PSS	0	-1.13333	0.99332	0.000432251	-0.4	0.553775	0.00306014	1	0.739369	4.50699e-05	2.4	1.35154	2.68768e-08
495120	htpG	+
496544			+	TSS	0	0.133333	0.611193	0.0156991	-0.266667	0.588785	0.0281989	1	0.588785	2.3677e-05	-0.533333	0.992121	0.000332478
496994	\htpG	\+
497133			+	TSS	0	-1.06667	2.56666	9.37332e-07	-0.866667	0.959166	0.0178257	0.133333	0.553775	0.000841145	-0.133333	0.529153	0.000893327
497175	adk	+
497819	\adk	\+
498055	hemH	+
499014	aes	-
499017	\hemH	\+
499973	\aes	\-
500125	gsk	+
501429	\gsk	\+
501562	ybaL	-
503238	\ybaL	\-
503476	fsr	-
504696	\fsr	\-
504914	ushA	+
506566	\ushA	\+
506603	ybaK	-
507082	\ybaK	\-
507204	chiX	+	+	UND	0	-5.26667	7.26637	9.66978e-15	1.46667	4.72723	5.91615e-12	0.266667	6.56416	2.18873e-11	0.666667	5.52869	4.86911e-15
507286	ybaP	-
507287	\chiX	\+
508080	\ybaP	\-
508218	ybaQ	+
508559	\ybaQ	\+
508875	copA	-
511379	\copA	\-
511409			-	TSS	0	-0.8	1.29994	0.00684389	-0.733333	0.972968	0.0297525	0.133333	0.416333	2.88907e-05	-0.2	0.326599	0.0908817
511641	glsA	+
512573	\glsA	\+
512576	ybaT	+
513868	\ybaT	\+
513993	cueR	+
514400	\cueR	\+
514401	ybbJ	-
514856	qmcA	-
514859	\ybbJ	\-
515773	\qmcA	\-
515892			+	TSS	0	-1.73333	2.52194	8.1572e-07	-1.06667	1.18322	0.0799951	0.2	0.163299	0.00092209	0.133333	0.326599	0.000709473
515919	fetA	+
516583	fetB	+
516596	\fetA	\+
517362	\fetB	\+
517425	ybbN	-
518279	\ybbN	\-
518301			-	TSS	0	-0.0666667	0.711852	0.0258862	-0.2	0.432494	0.00172011	0.533333	0.239418	1.35374e-06	0.533333	1.11355	0.000114381
518340	ybbO	-
519139	tesA	-
519149	\ybbO	\-
519733	ybbA	+
519765	\tesA	\-
520416	ybbP	+
520419	\ybbA	\+
522830	\ybbP	\+
523261	rhsD	+
527541	\rhsD	\+
527581	ybbC	+
527949	\ybbC	\+
527952	rhsH	+
528640	ybbD	+
528659	\rhsH	\+
529130	\ybbD	\+
529232			-	UND	0	-2.66667	2.34947	3.45936e-11	-1.46667	1.58746	3.54369e-05	1.73333	1.65328	2.26499e-11	0.4	2.86589	1.41029e-12
529500	ylbI	+
529592	\ylbI	\+
529595	ylbG	-
530016	\ylbG	\-
530132	mnmH	-
530168			-	UND	0	0.2	0.346412	1	0.266667	0.879394	0.284891	0.8	0.864988	1.7464e-05	0.266667	0.816497	2.02784e-05
531226	\mnmH	\-
531295	allS	-
532221	\allS	\-
532451	allA	+
532933	\allA	\+
532965			+	UND	0	-0.6	0.87178	3.19728e-06	-0.4	0.565685	0.0242721	-0.266667	0.239418	0.999993	0.266667	0.355546	1
532983			+	TSS	0	-0.6	0.952195	2.89993e-10	-1.06667	0.632456	7.34207e-07	-0.2	0.258199	0.000505933	-0.133333	0.115475	0.00304912
533011	allR	+
533826	\allR	\+
533916	gcl	+
535697	\gcl	\+
535710	hyi	+
536486	\hyi	\+
536586	glxR	+
537464	\glxR	\+
537633	ybbW	+
539087	\ybbW	\+
539147	allB	+
540508	\allB	\+
540565	ybbY	+
541866	\ybbY	\+
541888	glxK	+
543033	\glxK	\+
543261	allE	-
544046	\allE	\-
544057	allC	-
545292	\allC	\-
545314	allD	-
546363	\allD	\-
546680	fdrA	+
548347	\fdrA	\+
548357	ylbE	+
549616	\ylbE	\+
549627	ylbF	+
550439	ybcF	+
550442	\ylbF	\+
551332	\ybcF	\+
551527	purK	-
552591	purE	-
552594	\purK	\-
553100	\purE	\-
553218	lpxH	-
553940	\lpxH	\-
553943	ppiB	-
554437	\ppiB	\-
554487			-	TSS	0	-0.6	1.58352	0.0228443	-0.266667	0.732967	0.0296879	-0.133333	0.4	0.719841	0.4	0.565685	0.00073517
554488			-	TSS	0	-10	15.1349	6.47798e-17	-10.6	11.8633	1.92663e-15	1.13333	1.95619	2.28554e-15	3.6	3.747	2.72583e-16
554489			-	TSS	0	0.666667	2.46577	4.65106e-10	-1.46667	2.52982	4.16352e-05	-0.333333	1.16619	3.45532e-06	-0.2	0.824621	0.00169216
554490			-	UND	0	-1.46667	6.65733	6.95069e-13	-4.2	5.95659	1.04122e-14	1.4	2.26569	2.05477e-15	2.6	4.39545	1.15918e-15
554556			-	UND	0	-0.4	0.739369	4.74088e-06	-0.333333	0.565685	0.0380543	-0.0666667	0.355546	0.0824654	0.0666667	0.355546	0.00503305
554577			+	UND	0	-0.0666667	1.83251	1.3387e-10	-1.33333	0.894427	0.00141114	0.466667	0.326599	1.94566e-10	0	0.739369	5.25132e-06
554611	cysS	+
555996	\cysS	\+
556032	ybcI	-
556553	\ybcI	\-
556661	ybcJ	-
556873	\ybcJ	\-
556875	folD	-
557741	\folD	\-
557779			-	UND	0	-0.866667	4.24922	7.25883e-15	-2.73333	1.51117	0.000201348	0.733333	0.783157	3.53074e-09	0.266667	1.14891	5.58023e-09
558212	sfmA	+
558754	\sfmA	\+
558974	sfmC	+
559666	\sfmC	\+
559697	sfmD	+
562300	\sfmD	\+
562336	sfmH	+
563319	\sfmH	\+
563326			+	TSS	0	0.533333	1.32162	9.0134e-05	-0.533333	1.47874	5.07428e-05	0.2	0.952195	1.31176e-06	-0.466667	0.692823	0.000290204
563330	sfmF	+
563845	\sfmF	\+
563848	sfmZ	-
564480	\sfmZ	\-
564815	intD	-
565858	xisD	-
565978	\intD	\-
566079	\xisD	\-
566098	exoD	-
566376	peaD \exoD	+ \-
566684	renD	+
566687	\peaD	\+
566842	insE1	+
567138	insF1	+
567141	\insE1	\+
568004	\insF1	\+
568247	\renD	\+
568315	emrE	+
568647	\emrE	\+
568902	ybcK	+
570428	\ybcK	\+
570893	ybcL	+
571444	\ybcL	\+
571454	ybcM	+
572251	\ybcM	\+
572368	ylcH	+
572466	ybcN	+
572469	\ylcH	\+
572921	ninE \ybcN	+ \+
573084	ybcO	+
573091	\ninE	\+
573371	rusA	+
573374	\ybcO	\+
573730	ylcG	+
573733	\rusA	\+
573870	\ylcG	\+
573956	quuD	+
574339	\quuD	\+
574529	nmpC	-
574737	insH1	-
575753	\insH1	\-
576825	\nmpC	\-
576868			-	UND	0	-2.93333	2.6533	0.0019845	-0.266667	0.239418	1	0	0	1	0	0	1
577398	essD	+
577613	rrrD \essD	+ \+
578107	rzpD	+
578110	\rrrD	\+
578327	rzoD	+
578509	\rzoD	\+
578568	\rzpD	\+
578600	borD	-
578893	\borD	\-
578918			-	TSS	0	0.6	1.23288	2.88866e-12	-1.26667	1.39235	6.10045e-09	0.733333	0.966918	2.04989e-09	0.6	0.938832	4.11612e-13
578919			-	TSS	0	0.8	1.92528	6.62312e-13	-1.93333	1.78512	3.43525e-06	0.4	0.653197	6.96063e-09	1	1.21655	3.13771e-10
579184	ybcV	-
579594	\ybcV	\-
579880	ybcW	+
580086	\ybcW	\+
580251	ylcI	-
580445	\ylcI	\-
580834	nohD	+
581354	aaaD	+
581379	\nohD	\+
581660	tfaD	+
581662	\aaaD	\+
582097	\tfaD	\+
582152	ybcY	-
582806	\ybcY	\-
582953	tfaX	+
583135	\tfaX	\+
583681	appY	+
584430	\appY	\+
584680	ompT	-
585573			-	PSS	0	-1.4	4.16973	2.24057e-07	-0.866667	1.87972	0.00819587	-0.6	1.32162	0.00121049	0.333333	0.489898	0.000166295
585633	\ompT	\-
585661			-	UND	0	-0.8	0.816497	0.0443278	0.2	0.516398	0.00027882	-0.2	0.553775	0.0689957	0.0666667	0.516398	0.0779145
585662			-	TSS	0	-5.13333	12.7952	8.29923e-18	-8.13333	8.79848	1.08176e-16	-2.33333	1.44684	6.36368e-15	8.52651e-15	1.82287	1.02407e-14
585663			-	TSS	0	0.933333	2.69321	2.10983e-14	-3.33333	2.63312	1.67136e-08	0.733333	0.952195	6.39858e-12	1.53333	1.45144	2.9542e-13
585664			-	UND	0	-0.8	0.723769	2.77713e-05	-0.133333	0.416333	0.0358435	0.466667	0.642916	3.9322e-08	0.8	0.979796	3.49538e-10
586147	envY	-
586908	\envY	\-
587091	ybcH	-
587981	\ybcH	\-
587982	nfrA	-
590941	nfrB	-
590954	\nfrA	\-
593178	\nfrB	\-
593328	cusS	-
594760	cusR	-
594770	\cusS	\-
595443	\cusR	\-
595600	cusC	+
596973	\cusC	\+
597131	cusF	+
597463	\cusF	\+
597479	cusB	+
598702	\cusB	\+
598714	cusA	+
601857	\cusA	\+
601959	pheP	+
603335	\pheP	\+
603416	ybdG	-
604663	\ybdG	\-
604771	nfsB	-
605424	\nfsB	\-
605443			-	UND	0	-0.533333	1.86946	3.8021e-09	-1.33333	1.85831	0.038975	0.2	0.663325	0.0158394	-0.2	0.739369	0.600888
605451			-	TSS	0	-0.666667	1.68918	6.52322e-12	-0.533333	1.83251	1.04903e-07	-0.666667	0.848528	4.3393e-06	-0.0666667	0.432494	0.000577487
605518	ybdF	-
605886	\ybdF	\-
605910			-	TSS	0	-4.06667	3.96316	8.73989e-09	-0.466667	0.6	0.51617	-0.2	0.476952	0.735369	0.533333	0.447214	1.29227e-07
605951	ybdJ	-
606199	\ybdJ	\-
606265	ybdK	-
607383	\ybdK	\-
607734	sokE	+
607790			-	TSS	0	-2.13333	3.14963	5.75924e-08	-2.26667	2.87134	1.92865e-05	0.2	1.24366	2.77707e-05	-0.666667	1.51982	0.000217698
607792	\sokE	\+
607836	hokE	+
607988	\hokE	\+
608065	insL1	+
609177	\insL1	\+
609459	entD	-
610079	\entD	\-
610254	fepA	-
612494	\fepA	\-
612737	fes	+
613939	\fes	\+
613942	ybdZ	+
614157	entF	+
614160	\ybdZ	\+
618038	\entF	\+
618254	fepE	+
619384	fepC	-
619387	\fepE	\+
620196	fepG	-
620199	\fepC	\-
621185	fepD	-
621188	\fepG	\-
622189	\fepD	\-
622300	entS	+
623550	\entS	\+
623554	fepB	-
624510	\fepB	\-
624885	entC	+
626060	\entC	\+
626070	entE	+
627680	\entE	\+
627694	entB	+
628551	entA \entB	+ \+
629297	\entA	\+
629300	entH	+
629713	\entH	\+
629858			+	TSS	0	-1.53333	0.774597	0.802221	0	0.163299	0.527587	0.0666667	0.2	0.0810091	1.4	0.916515	1.50911e-07
629894	cstA	+
631999	\cstA	\+
632182	ybdD	+
632379	\ybdD	\+
632389	ybdH	-
633477	\ybdH	\-
633586	ybdL	+
634746	\ybdL	\+
634747	ybdM	-
635349	ybdN	-
635376	\ybdM	\-
636569	\ybdN	\-
636716	ybdO	-
637618	\ybdO	\-
637827	dsbG	-
638573	\dsbG	\-
638629			+	TSS	0	-1.73333	0.972968	3.24361e-05	-0.266667	0.258199	0.806386	0.266667	0.588785	0.880989	0.533333	1.35154	1
638693			+	UND	0	0	0.816497	1.80017e-10	-0.6	0.653197	0.0249304	1.46667	1.36626	1.74572e-07	-1.6	1.33666	0.13801
638762			+	PSS	0	-0.466667	0.765942	1.08268e-09	-0.333333	0.846347	4.08216e-05	-0.333333	0.87178	1.09825e-05	-0.0666667	0.6	0.000919685
638763			+	PSS	0	0.266667	3.91748	3.71293e-12	-2.33333	3.36453	7.45138e-08	-0.8	1.69312	7.87586e-11	0.2	1.94389	2.34764e-06
638831			+	TSS	0	0.6	1.14395	1.36676e-13	-1.13333	1.17757	9.58922e-10	1.33333	1.51982	1.60152e-13	-0.266667	1.84399	3.05478e-10
638835			+	UND	0	0.266667	1.27176	8.7465e-07	-0.6	1.17189	1.75372e-06	-0.0666667	0.692823	1.2522e-05	-0.466667	0.476952	0.820112
638881			+	TSS	0	-6.86667	8.2813	1.11874e-15	-3	2.72294	4.8985e-14	-0.533333	1.74356	3.43942e-12	1	1.64114	8.22875e-14
638907			+	PSS	0	-0.466667	1.13138	3.8185e-06	-0.4	0.723769	0.000544088	0.0666667	0.4	0.000710524	-0.266667	0.416333	0.7198
638918			+	TSS	0	2.2	1.69312	6.07652e-15	-2.46667	1.67333	1.80725e-09	-0.533333	0.673333	1.21932e-05	-0.133333	0.365148	5.36834e-05
638919			+	UND	0	2	1.14891	4.71484e-14	-1.46667	1.22222	2.12357e-09	-0.533333	0.673333	0.0452743	0.0666667	0.611193	0.000778839
638920			+	UND	0	0.8	0.611193	6.91418e-12	-0.333333	0.832666	6.15488e-07	-0.666667	0.673333	0.00528645	0.0666667	0.2	0.00012972
638921			+	TSS	0	53.6	33.2972	7.92391e-21	-51.0667	33.5773	8.24929e-19	-11.9333	4.34511	1.33232e-15	-1.6	2.216	4.49695e-13
638922			+	PSS	0	5.2	3.58887	2.9477e-16	-2.13333	3.69685	1.61528e-12	-2.4	1.49492	6.92994e-08	-1.33333	0.856349	0.000582829
638923			+	TSS	0	0.666667	1.7733	1.71763e-06	7.10543e-16	1.18884	8.17841e-07	0.133333	0.916515	7.6139e-09	5.32907e-16	0.99332	1.78311e-06
638926			+	UND	0	0.266667	0.879394	7.74454e-11	0.133333	1	1.0548e-08	-0.666667	0.979796	0.00230005	-0.2	0.282843	0.875943
638927			+	UND	0	1.4	0.565685	1	-0.266667	0.832666	1.12074e-07	-0.6	0.765942	0.000409667	-0.533333	0.461882	1
638945	ahpC	+
639002			+	UND	0	0.2	0.346412	1	0.6	0.692823	5.25645e-05	0.133333	0.879394	1.2059e-06	0.466667	2.13542	0.000326332
639429			+	UND	0	1.26667	1.76257	0.00267782	-1.53333	1.7982	0.516077	0.2	0.791623	0.0308371	-0.4	0.653197	0.886937
639445			+	UND	0	0.466667	2.42874	0.000423162	-0.8	1.89385	0.0158036	-0.0666667	0.673333	0.0458229	0	0.748331	0.0566113
639508	\ahpC	\+
639724			+	UND	0	3	4.27551	1.62865e-15	-4.26667	3.95474	3.26128e-07	-0.333333	1.66446	3.01356e-06	-0.266667	0.6	0.028907
639731			+	PSS	0	3.26667	2.65123	7.98215e-12	-4.26667	2.53587	0.00149477	0	0.326599	0.0595178	0.0666667	0.326599	0.00232857
639732			+	PSS	0	7.73333	9.41135	9.62899e-10	-9.13333	9.36874	0.000306391	0	0.476952	0.00111367	0.333333	0.611193	0.000167049
639733			+	UND	0	1.4	2.71293	1.86385e-05	-2.2	2.61534	1	0.0666667	0.115475	1	0.4	0.163299	0.000323815
639753	ahpF	+
641318	\ahpF	\+
641439	uspG	-
641867	\uspG	\-
641901			-	UND	0	-1.53333	2.38476	1.78059e-10	-1.46667	0.432494	0.0726065	-0.0666667	0.239418	0.111254	0.533333	0.553775	0.000395288
642088	ybdR	+
643326	\ybdR	\+
643557	rnk	-
643967	\rnk	\-
644197	rna	-
645003	\rna	\-
645032			-	TSS	0	-0.866667	1.22746	1.53396e-06	-0.666667	0.489898	0.746092	0.133333	0.282843	0.0525014	0.733333	1.25543	0.000516683
645117	citT	-
646580	\citT	\-
646631	citG	-
647484	citX	-
647509	\citG	\-
648035	\citX	\-
648039	citF	-
649571	\citF	\-
649582	citE	-
650487	citD	-
650490	\citE	\-
650783	\citD	\-
650798	citC	-
651856	\citC	\-
652235	citA	+
653862	citB	+
653893	\citA	\+
654542	\citB	\+
654583	dcuC	-
655968	\dcuC	\-
656557	pagP	+
657117	\pagP	\+
657216			+	UND	0	0.666667	1.74738	8.16845e-07	-1.46667	1.56631	1	0.333333	0.355546	1	0.2	0.972968	0.495367
657249			+	TSS	0	-2.4	4.81945	9.11437e-05	-0.8	0.992121	0.000394852	1.86667	3.29444	0.000167924	2.46667	5.26245	1.54187e-07
657267			+	UND	0	-0.8	1.25433	0.000204191	-0.6	0.6	0.079994	-1.9984e-16	0.2	0.137434	1.9984e-16	0.282843	0.754684
657292	cspE	+
657301			+	UND	0	-3.13333	3.19374	2.87083e-06	-0.466667	0.382978	0.846405	0.0666667	0.258199	0.496563	0.133333	0.516398	0.49721
657332			+	UND	0	-0.133333	0.8	9.81249e-05	-0.4	0.588785	0.0425171	-0.333333	0.416333	0.999974	0.466667	0.163299	1
657375			+	UND	0	-1.3	2.5898	3.15477e-08	-0.6	0.516398	0.00153788	0.333333	0.461882	0.0148886	-0.333333	0.461882	0.00529967
657501	\cspE	\+
657555	flc	-
657938	\flc	\-
658031	ybeM	+
658818	\ybeM	\+
658947	tatE	+
659150	\tatE	\+
659251	lipA	-
659678			+	TSS	0	0.6	0.721113	1	-0.133333	0.732967	2.77704e-06	2.53333	1.52753	2.04988e-10	0.866667	1.68127	5.34291e-09
660216	\lipA	\-
660299			-	TSS	0	-5.32907e-16	1.68312	2.60911e-05	-0.733333	0.986577	0.0255495	-0.333333	0.711852	0.106953	0	0.258199	0.757996
660425	ybeF	-
661378	\ybeF	\-
661637	lipB	-
662278	\lipB	\-
662379	ybeD	-
662642	\ybeD	\-
662752	dacA	-
663963	\dacA	\-
664102	rlpA	-
665190	\rlpA	\-
665201	mrdB	-
666313	\mrdB	\-
666316	mrdA	-
668217	\mrdA	\-
668248	rlmH	-
668715	\rlmH	\-
668719	rsfS	-
669036	\rsfS	\-
669296	cobC	-
669907	\cobC	\-
669931	nadD	-
670572	\nadD	\-
670574	holA	-
671605	lptE \holA	- \-
672186	\lptE	\-
672201	leuS	-
674783	\leuS	\-
674843			-	TSS	0	1.26667	8.36663	2.05986e-17	-9.06667	6.49373	8.50036e-15	1.13333	1.72434	8.26126e-15	2	1.61659	1.14898e-15
675018	ybeL	+
675500	\ybeL	\+
675570	ybeQ	-
676547	\ybeQ	\-
676711	ybeR	+
677415	djlB	+
677418	\ybeR	\+
678842	\djlB	\+
678852	ybeT	-
679406	\ybeT	\-
679508	ybeU	+
680212	djlC	+
680215	\ybeU	\+
681663	\djlC	\+
681723	hscC	-
683393	\hscC	\-
683477	rihA	-
684412	\rihA	\-
684530	gltL	-
685255	gltK \gltL	- \-
685929	gltJ \gltK	- \-
686669	\gltJ	\-
686837			-	PSS	0	0.333333	1.81475	3.17379e-05	-0.6	1.8	8.28522e-05	-0.133333	0.923764	3.63854e-06	0.2	0.621825	6.18612e-05
686839	gltI	-
686841			-	PSS	0	1.2	3.18748	1.80582e-08	-1.66667	2.98887	1.44451e-07	0.533333	1.59164	9.18431e-08	-0.2	0.966918	1.71e-07
687747	\gltI	\-
687997	insH1	-
689013	\insH1	\-
689343	lnt	-
690794			-	PSS	0	-1.33333	1.99666	7.53973e-05	-0.666667	0.816497	0.0476322	1.46667	0.952195	1.82134e-05	1.93333	4.71272	1.0697e-05
690881	\lnt	\-
690906	ybeX	-
691784	\ybeX	\-
691874	ybeY	-
692338	ybeZ	-
692341	\ybeY	\-
692345			-	PSS	0	0.133333	0.355546	6.62411e-08	-0.266667	0.365148	0.00121229	0.266667	0.416333	0.000375761	0.0666667	0.846347	2.52804e-05
692750			-	TSS	0	-0.0666667	1.54488	0.014753	-0.266667	1.23828	9.91615e-05	0	0.447214	0.000167251	-6.21725e-16	0.382978	4.29252e-06
693378	\ybeZ	\-
693434			-	UND	0	-0.533333	0.732967	0.881842	0.2	0.326599	0.0278029	0.8	1.89342	1.21181e-06	0.333333	1.38565	9.26103e-07
693467			-	UND	0	-0.166667	0.772442	1.28295e-06	-0.733333	0.692823	0.0898562	1.8	0.832666	1.94711e-08	-0.866667	0.938832	7.96171e-09
693531	miaB	-
694955	\miaB	\-
694989			-	UND	0	0.4	1.38821	2.05459e-09	-1.13333	1.18884	0.0591332	0.466667	0.432494	2.88848e-06	-0.0666667	0.673333	0.000399983
694990			-	UND	0	0.266667	0.791623	8.80898e-09	-0.733333	0.663325	0.0573258	0	0.326599	0.0712899	0.8	1.19839	0.000109276
695077			+	TSS	0	-1	1.31656	0.0127347	-0.4	0.979796	0.00194244	0.133333	0.529153	0.00125035	0.0666667	0.6	2.90381e-05
695101	ubiF	+
696276	\ubiF	\+
697513	asnB	-
699177	\asnB	\-
699574	umpH	-
700326	\umpH	\-
700374	nagC	-
700647			-	UND	0	0.466667	0.365148	1	-6.21725e-16	0.516398	3.59473e-06	0.8	0.886942	2.0252e-09	1.4	2.63818	5.9946e-12
701594	\nagC	\-
701603	nagA	-
701863			-	TSS	0	-2.33333	2.12629	3.83566e-05	-0.333333	0.163299	1	0.333333	0.365148	1	0.4	0.476952	2.24574e-08
702751	\nagA	\-
702811	nagB	-
703611	\nagB	\-
703635			-	PSS	0	-4.26667	3.95811	3.9998e-07	-1.13333	0.711852	1	0.333333	0.355546	1	0	0.326599	0.00231439
703636			-	UND	0	-2	4.24169	0.00377326	-1.8	2.36513	1	0.133333	0.239418	1	0.133333	0.516398	0.504376
703840			+	TSS	0	-1.86667	1.52753	0.00221482	-0.266667	0.346412	0.783595	-0.0666667	0.115475	0.896361	0.4	0.326599	1
703944	nagE	+
705860			+	UND	0	-0.333333	0.683135	2.85134e-08	-0.4	0.346412	0.00115902	0	0.326599	0.00180109	0.733333	1.13725	0.000272404
705890	\nagE	\+
706060			+	TSS	0	-1.46667	2.44131	7.08689e-07	-0.733333	0.938832	6.73397e-06	0.133333	0.541626	8.55589e-06	0.666667	1.14395	5.07456e-05
706061			+	TSS	0	0.466667	1.61245	3.41422e-07	-0.6	1.68127	2.6891e-07	-0.666667	0.765942	0.00310249	0.6	1.35154	0.0283308
706062			+	UND	0	-0.0666667	1.13138	2.5082e-06	-0.666667	0.939493	0.00115902	-0.0666667	0.355546	0.0609782	-0.2	0.2	0.999938
706063			+	TSS	0	4.13333	9.42483	1.31422e-16	-9.76667	8.57146	3.32379e-10	1.36667	1.53565	2.66814e-08	2.26667	5.31898	1.52689e-10
706093	glnS	+
707757	\glnS	\+
708334	chiP	+
709740	\chiP	\+
709790	chiQ	+
710116	\chiQ	\+
710200	fur	-
710639	uof	-
710646	\fur	\-
710714			-	UND	0	0	1.4376	3.73898e-12	-1.4	0.882938	0.068186	0.533333	0.6	2.46179e-06	-0.666667	0.553775	0.836409
710721			-	UND	0	-1.6	1.12546	0.863383	-0.0666667	0.115475	0.828499	0.0666667	0.115475	1	0.866667	1.13246	0.00472855
710725	\uof	\-
710826			-	TSS	0	-1.93333	1.89385	4.35972e-05	-0.933333	0.721113	0.00273346	1	0.791623	5.15374e-07	-5.32907e-16	0.99332	1.11398e-08
710935	fldA	-
711465	\fldA	\-
711519			-	TSS	0	-0.733333	2.44444	8.87893e-13	-2.26667	2.42776	2.24075e-05	0.733333	0.832666	2.04255e-06	0.0666667	1.39235	4.73103e-05
711605	ybfE	-
711898	\ybfE	\-
711950			-	TSS	0	0.866667	0.588785	6.39377e-07	-0.133333	0.824621	8.26717e-07	-0.133333	0.87178	0.000308214	-0.2	0.711852	0.000676977
712038	ybfF	-
712802	\ybfF	\-
712916			+	UND	0	-0.666667	0.632456	1.88178e-07	-0.2	0.355546	3.24801e-05	-0.0666667	0.355546	0.0734178	0.333333	0.529153	0.000682173
712987	seqA	+
713532	\seqA	\+
713558	pgm	+
715198	\pgm	\+
715412	ybfP	+
715906	\ybfP	\+
715947	ybfG	-
716506			-	UND	0	0.0666667	0.115475	1	0.6	0.432494	4.8859e-07	0.866667	0.824621	9.80469e-12	-0.866667	0.8	8.8841e-08
716597	\ybfG	\-
716638			-	TSS	0	4.73333	3.39737	2.6307e-11	17.0667	7.57452	5.86519e-19	6.2	9.58819	1.27559e-18	-1.26667	7.99583	1.00881e-17
716639			-	TSS	0	2.73333	1.38821	1	19.0667	4.56292	9.12469e-19	4.3	5.97347	4.16115e-18	0.166667	9.63698	1.76159e-17
716640			-	UND	0	1.2	0.553775	1	5.6	2.14165	5.02405e-17	1	2.86822	1.70021e-16	0.733333	4.99333	1.51822e-12
716641			-	UND	0	1.73333	1.25433	1	3.93333	1.38565	6.4191e-17	-0.733333	1.54919	1.64306e-15	2.06667	2.63818	3.33135e-16
716721	ybfI	-
716870	\ybfI	\-
716946	potE	-
718262	speF	-
718265	\potE	\-
720460	\speF	\-
720583	ybfK	+
720840	\ybfK	\+
721056	kdpE	-
721730	kdpD	-
721733	\kdpE	\-
724407	kdpC	-
724414	\kdpD	\-
724979	\kdpC	\-
724988	kdpB	-
727036	\kdpB	\-
727059	kdpA	-
728732	kdpF \kdpA	- \-
728821	\kdpF	\-
728847			-	UND	0	-0.4	0.4	1	0.0666667	0.115475	1	1.26667	1.46516	8.73724e-09	0.733333	1.69756	1.78551e-10
729072			+	TSS	0	-2.33333	3.36556	7.72181e-13	-0.933333	0.938832	6.57798e-09	-0.133333	0.6	3.40613e-06	0	0.533223	1.91582e-09
729134	ybfA	+
729340	\ybfA	\+
729583	rhsC	+
733776	ybfB \rhsC	+ \+
734102	\ybfB	\+
734133	rhsO	+
735650	ybfC	+
735653	\rhsO	\+
736219	\ybfC	\+
736445	ybfQ	+
736684	\ybfQ	\+
736825	ybfL	+
737961	\ybfL	\+
738092	ybfD	+
738853	\ybfD	\+
739001	ybgA	+
739507	phr	+
739510	\ybgA	\+
740925	\phr	\+
741075	dtpD	-
742556	\dtpD	\-
742798			+	TSS	0	-0.133333	1.23288	6.83136e-07	-0.866667	0.692823	0.0799951	-0.0666667	0.163299	0.821654	0.133333	0.239418	0.0578413
742827	ybgI	+
743570	\ybgI	\+
743593	ybgJ	+
744243	ybgK	+
744249	\ybgJ	\+
745165	ybgL	+
745175	\ybgK	\+
745899	\ybgL	\+
745935	nei	+
746723	abrB	-
746726	\nei	\+
747769	\abrB	\-
747801			-	UND	0	-2.4	1.94936	0.774491	0.0666667	0.258199	0.518385	0	0.258199	0.0774413	-0.0666667	0.163299	0.812033
747921	ybgO	-
748979	ybgP	-
748982	\ybgO	\-
749707	\ybgP	\-
749722	ybgQ	-
752169	\ybgQ	\-
752229	ybgD	-
752795	\ybgD	\-
753185	gltA	-
754468	\gltA	\-
754669			-	UND	0	-2.66667	2.8775	4.11925e-07	-0.866667	0.447214	0.107855	0.533333	0.8	0.00037691	1.66667	1.86548	5.0253e-08
754675			-	UND	0	-3.6	4.56292	0.0295368	-0.666667	0.986577	0.999989	0.266667	0.355546	1	0.933333	1.11514	8.78169e-05
754676			-	PSS	0	-6.8	7.22957	0.000683207	-0.133333	0.355546	0.0380523	0.0666667	0.382978	0.0411692	1.46667	0.856349	1.63308e-05
754679			-	TSS	0	-1.8	1.94594	0.00223255	-0.266667	0.239418	1	0	0	1	0.0666667	0.115475	1
754681			-	UND	0	-1.8	1.11355	0.126783	0	0.239418	0.11471	0.133333	0.346412	0.0404188	0.266667	0.87178	0.041376
754719			-	TSS	0	-3.26667	3.61599	0.0317229	-0.133333	0.4	0.0491263	0.133333	0.4	0.0265845	0.266667	0.447214	1.62637e-07
754770			-	UND	0	-0.733333	0.816497	0.653284	-0.133333	0.365148	0.606685	0.533333	0.346412	6.00033e-08	0.6	1.83251	7.46499e-09
754840			+	TSS	0	0.266667	0.115475	1	1.46667	0.588785	6.42947e-13	1.5	1.66433	4.68022e-11	6.1	7.18412	1.77315e-12
754955			+	TSS	0	-6.86667	4.29418	2.20854e-11	-0.933333	0.87178	0.000824239	2.93333	2.68817	8.19999e-09	4.8	3.75556	1.17325e-15
755177	sdhC	+
755449			+	UND	0	-1.26667	0.986577	1	0.133333	0.115475	1	0.133333	0.476952	0.575104	0.666667	0.886942	0.000113969
755560	sdhD	+
755566	\sdhC	\+
755883			+	UND	0	-0.666667	1.58352	0.486052	0.133333	0.632456	0.000618411	0.266667	0.848528	0.000372949	-0.266667	0.774597	3.81059e-05
755907	sdhA \sdhD	+ \+
756364			+	UND	0	-0.6	1.46516	0.00177591	-0.266667	0.258199	0.846341	0.266667	0.489898	0.0239646	1.03333	0.911434	7.41236e-07
757456			+	UND	0	-0.866667	1.26323	0.776896	-0.0666667	0.258199	0.591662	0	0.163299	0.672223	0.6	0.653197	0.000345764
757673	\sdhA	\+
757689	sdhB	+
757825			+	UND	0	-2.26667	4.59715	0.00388569	-1.13333	1.47422	0.541721	0.533333	0.565685	2.17524e-08	1.53333	3.27618	0.000110427
758405	\sdhB	\+
758554			+	PSS	0	-0.933333	1.35154	0.000910501	-0.266667	0.739369	0.541839	0.4	0.683135	0.000263335	2.6	4.36584	1.83441e-05
758585			+	UND	0	-1.73333	1.71659	0.000683207	-0.333333	0.239418	0.783658	0	0.163299	0.638762	1.2	1.13138	3.16648e-07
758706	sucA	+
758999			+	UND	0	0.133333	1.25433	0.000156446	-0.733333	1.1755	0.0726058	0.2	0.4	0.0283421	-0.0666667	0.432494	0.0027335
759059			+	TSS	0	-0.933333	2.31229	1.20093e-05	-0.533333	0.945163	0.602598	0.0666667	0.416333	0.0417036	0.8	0.653197	1.24674e-06
760737			+	TSS	0	-1	1.29615	0.000273809	-0.6	0.87178	0.0761093	0.133333	0.163299	7.84077e-05	-0.133333	0.258199	0.803603
761388			+	PSS	0	-0.4	1.17757	1.62975e-06	-0.733333	0.923764	0.0622947	0.333333	0.326599	8.80691e-06	0.4	1.64581	0.000360938
[truncated: 10,022 more rows]

## Sheet: A values
						tagging-acceleration during 5 min intervals
EcoCyc	Coordinate	CDS (synonymous)	Strand	Tag strand	RNA end	A0	A5	∆A5	pA5	A10	∆A10	pA10	A15	∆A15	pA15	A20	∆A20	pA20
	146			+	TSS	0	-0.0666667	0.193384	0.000176152	0.0266667	0.236779	2.00506e-06	-0.0133333	0.356392	3.84704e-05	0.226667	0.379585	2.64601e-10
	147			+	TSS	0	-0.0666667	0.158352	0.00173682	0.0533333	0.171275	0.0399761	0.0133333	0.211664	0.00395671	-0.0266667	0.214165	0.00568205
EcoCyc (D)	148			+	TSS	0	-4.71333	3.55399	5.48517e-14	3.6	3.81397	2.03038e-11	1.82	1.58332	3.35045e-14	-0.153333	0.687715	9.50233e-13
	149			+	TSS	0	-0.16	0.194594	0.159586	0.133333	0.234379	0.00295802	0.0266667	0.134667	0.00898498	0	0.611193	0.012002
	190	thrL	+
	255	\thrL	+
	337	thrA	+
	2799	\thrA	+
	2801	thrB	+
	3733	\thrB	+
	3734	thrC	+
	5020	\thrC	+
	5234	yaaX	+
	5530	\yaaX	+
	5683	yaaA	-
	6459	\yaaA	-
	6529	yaaJ	-
	7959	\yaaJ	-
EcoCyc	8191			+	TSS	0	-2.62	2.58798	1.01357e-15	1.35333	2.61295	2.05039e-13	1.32	0.767922	8.20271e-13	-0.0266667	0.446624	2.83092e-13
	8192			+	TSS	0	-0.0533333	0.25923	6.49566e-06	-0.106667	0.319934	0.00847069	0.24	0.18619	2.9937e-05	-0.133333	0.142361	1.40954e-05
	8198			+	PSS	0	0.28	1.57555	3.48598e-08	-1.46667	1.96671	5.19193e-05	1.17333	1.29243	5.43706e-06	0.173333	0.917256	7.54728e-05
	8199			+	PSS	0	0.0266667	0.239577	0.0449842	-0.08	0.325898	0.000921405	0.0933333	0.263462	0.00154383	-0.146667	0.193225	0.136599
	8238	talB	+
	8638			+	PSS	0	1.06581e-16	0.136627	0.000608396	-0.16	0.186196	0.368593	0.146667	0.132665	0.959077	0.08	0.565685	6.32984e-05
	9191	\talB	+
	9277			+	TSS	0	-0.253333	0.433282	3.40933e-11	0.0133333	0.448451	0.0101596	0.293333	0.161658	0.0808224	-0.0266667	0.168127	6.73535e-05
	9306	mog	+
	9893	\mog	+
	9928	satP	-
	10494	\satP	-
	10643	yaaW	-
	11356	\yaaW	-
	11382	yaaI	-
	11786	\yaaI	-
	12046			+	TSS	0	-0.12	0.134667	0.000124471	0.12	0.152288	8.77985e-05	0.213333	0.196613	2.33761e-08	-0.16	0.399228	6.35977e-09
	12047			+	TSS	0	-0.133333	0.169269	0.00185092	3.9968e-16	0.188642	1	0.773333	0.485552	3.08209e-09	-0.666667	0.736618	1
EcoCyc (H)	12048			+	TSS	0	-4.97333	6.32645	8.51465e-15	2.25333	6.96728	2.95259e-14	14.5333	5.88363	8.38168e-18	-7.78667	5.22916	5.10665e-18
	12049			+	TSS	0	-0.266667	0.331476	1.37942e-07	0.186667	0.351774	0.0016551	0.533333	0.482425	2.24558e-07	-3.55271e-15	0.673518	2.15405e-09
	12121			+	TSS	0	-0.333333	0.691755	4.4733e-11	0.24	0.738934	8.38446e-12	0.933333	0.63344	4.06545e-14	-0.813333	1.26323	1.94688e-13
	12122			+	UND	0	-0.24	0.372252	3.66681e-06	0.24	0.421595	8.74775e-09	0.6	0.315869	2.50498e-13	-0.733333	0.533443	5.64344e-12
EcoCyc (H)	12123			+	UND	0	-1.4	2.27649	6.83607e-14	1.42667	2.36565	1.26477e-14	2.50667	0.935815	2.24942e-16	-2.16	2.34246	5.34771e-16
	12124			+	TSS	0	-0.333333	0.236643	0.0943349	0.52	0.368782	9.65941e-11	-0.0266667	0.488262	1.74737e-11	0.08	0.715914	3.93751e-12
	12140			+	UND	0	-0.0533333	0.864988	0.307181	0.04	0.111976	0.908332	0.106667	0.121641	1.81202e-05	-0.0533333	0.184752	0.00160544
	12142			+	PSS	0	-2.44	2.62298	1.62058e-11	1.94667	2.85974	1.34744e-14	3.36	1.72379	1.94798e-16	-3.28	3.16357	1.62157e-11
	12143			+	UND	0	-0.2	0.269333	0.0141797	0.213333	0.297557	0.846775	0.0266667	0.194451	0.00253819	-0.08	0.171373	0.0004851
EcoCyc (H)	12144			+	TSS	0	-0.12	0.147874	0.979003	0.133333	0.153188	0.0635188	0.16	0.115474	1.4044e-09	-0.24	0.166536	8.15626e-07
	12159			+	TSS	0	-0.0933333	0.8	0.032953	0.0933333	0.952195	0.261929	0.186667	0.126492	4.78836e-08	-0.0133333	0.276365	7.13112e-09
	12163	dnaK	+
	12175			+	UND	0	-0.0933333	0.144223	0.0296435	0.0533333	0.147874	0.999989	0.16	0.832684	2.51017e-06	-0.0666667	0.172824	1
	12529			+	UND	0	-0.186667	0.252646	0.00015233	0.12	0.258913	0.34804	0.106667	0.136395	0.81685	0.373333	0.355528	5.99824e-09
	12891			+	UND	0	-0.4	0.534666	2.33975e-09	2.44249e-15	0.734324	4.05651e-06	1.37333	0.857283	3.38552e-14	-0.746667	1.42616	1.15809e-13
	13052			+	UND	0	0.173333	0.454313	1.28782e-07	-0.546667	0.626873	0.974706	0.906667	0.534672	9.30084e-13	-0.133333	0.528954	1.09499e-13
	14069			+	UND	0	0.2	0.245493	6.48644e-10	-0.386667	0.359259	0.00649725	0.44	0.292872	3.3382e-11	0.413333	0.177388	5.88256e-14
	14079	\dnaK	+
	14168	dnaJ	+
	14567			+	UND	0	-0.133333	0.426578	3.671e-07	-0.0266667	0.474693	0.017123	0.253333	0.235313	0.00260561	-0.186667	0.183333	0.245668
	15298	\dnaJ	+
	15445	insL1	+
	16557	\insL1	+
	16751	mokChokC	--
	16903	\hokC	-
	16952	sokC	+
	16959			+	UND	0	-0.16	0.363767	0.00352789	0.133333	0.329395	0.00491871	-0.0133333	0.163299	0.917463	0.266667	0.385748	0.0172301
	16960	\mokC	-
	17006	\sokC	+
	17454			+	TSS	0	-0.146667	0.222716	0.00969477	0.133333	0.2498	0.830904	0.14	0.413214	8.56029e-07	-0.253333	0.444461	0.0207131
	17489	nhaA	+
	18655	\nhaA	+
	18715	nhaR	+
	19620	\nhaR	+
	19811	insB1	-
	20233	insA	-
	20314	\insB1	-
	20508	\insA	-
	20815	rpsT	-
	20908			-	UND	0	-0.0666667	0.511772	2.21841e-06	-0.133333	0.639225	2.54742e-08	0.12	0.417612	5.50161e-05	0.266667	0.258199	3.99656e-08
	20917			-	UND	0	-0.0666667	0.356545	0.00241213	-0.0266667	0.397968	0.171129	0.08	0.178885	0.903903	0.0133333	0.18327	0.0169135
	20918			-	UND	0	0.0266667	0.287519	0.00284339	-0.16	0.417148	0.136757	0.08	0.323542	0.949116	0.133333	0.163497	0.0284435
	20926			-	UND	0	-0.0933333	0.169269	0.178713	0.0533333	0.222839	0.0163955	0.0933333	0.158325	0.00888956	-0.0933333	0.168127	0.295228
	20927			-	PSS	0	-0.613333	1.34534	1.74796e-07	-0.133333	1.5379	0.0345669	0.813333	0.767428	0.000438429	0.08	0.365393	0.000260878
	20934			-	TSS	0	0.08	0.296648	0.00155817	-0.24	0.498784	0.00428109	0.16	0.297546	0.0115128	0.0133333	0.142365	0.0121338
	20936			-	UND	0	-0.173333	0.39598	0.00013148	0.0933333	0.458484	6.36348e-05	0.04	0.247666	0.224056	0.0666667	0.128582	0.130081
	21078	\rpsT	-
	21092			-	TSS	0	0.0133333	0.11755	3.30445e-10	-0.133333	0.136626	0.0057519	0.226667	0.151439	2.85723e-07	-0.186667	0.17588	0.000296262
	21096			-	UND	0	0.173333	0.478835	3.49486e-12	-0.293333	0.639129	1.35197e-10	0.08	0.548497	1.08958e-09	-0.0666667	0.442958	7.48107e-11
	21109			-	UND	0	0.186667	0.183333	3.80716e-06	-0.306667	0.262568	3.15462e-07	0.293333	0.392693	1.72407e-05	-0.373333	0.493229	0.00661252
	21110			-	UND	0	0.88	0.258393	4.14577e-16	-0.333333	2.23883	9.01526e-17	-2.52	2.85518	2.49215e-14	2.77333	2.19244	2.21864e-15
	21112			-	TSS	0	0.04	0.586515	5.42911e-07	-0.346667	0.789937	5.72502e-09	0.146667	0.545382	8.91971e-05	0.28	0.2216	1.64502e-07
	21113			-	UND	0	0.08	0.144223	8.94536e-08	-0.266667	0.174356	0.317051	0.293333	0.113138	0.00111935	-0.16	0.158352	0.0128012
	21115			-	TSS	0	0	0.853157	2.65843e-13	-0.226667	0.98462	9.29063e-11	0.173333	0.628649	1.34809e-11	0.44	0.841725	4.10078e-10
	21116			-	TSS	0	6.06667	19.2865	1.08034e-19	-24.3867	22.2635	5.92841e-19	27.9067	14.5689	9.9637e-19	-5.45333	19.6166	2.20693e-18
	21117			-	TSS	0	1.10667	5.2398	2.55474e-16	-4.82667	6.31736	2.52893e-16	6.26667	4.37736	1.72313e-16	-1.41333	4.59588	1.58263e-15
	21118			-	TSS	0	0.28	0.533112	6.1311e-10	-0.64	0.617432	8.4344e-12	0.546667	0.497478	9.91959e-12	-0.213333	0.486725	6.51062e-12
EcoCyc	21119			-	TSS	0	0.0933333	0.295748	1.29541e-10	-0.28	0.357248	7.92728e-08	0.506667	0.239435	3.04779e-09	-0.333333	0.197316	4.83516e-11
	21181	yaaY	+
	21204			-	TSS	0	-0.08	0.184753	3.98109e-10	-0.04	0.213963	8.23168e-05	0.293333	0.115538	1.43863e-08	-0.0666667	0.259297	1.82558e-08
	21205			-	TSS	0	1.97333	3.84694	3.40216e-18	-7.58667	4.79566	3.28677e-16	6.08	3.52356	7.33734e-16	0.44	1.63199	3.58348e-16
	21206			-	UND	0	0.2	0.225926	5.46301e-12	-0.533333	0.299333	0.00701511	0.4	0.237767	5.70711e-05	-0.0266667	0.191834	3.23808e-07
EcoCyc	21207			-	UND	0	-0.146667	0.251926	8.8451e-11	-3.33067e-16	0.337543	7.76984e-10	0.186667	0.217869	1.84868e-07	2.22045e-17	0.241116	4.93346e-06
EcoCyc (D)	21383			+	TSS	0	0.413333	0.591443	1.64355e-12	-1.25333	0.8895	0.120163	0.96	0.564742	2.98918e-05	0.0133333	0.325977	3.78079e-06
	21384			+	UND	0	-0.0533333	0.178885	0.00166895	-0.08	0.265591	0.979884	0.2	0.124365	0.000940084	-0.0666667	0.115475	0.00561077
	21399	\yaaY	+
	21407	ribF	+
	22348	\ribF	+
	22391	ileS	+
	25207	lspA \ileS	++
	25701	\lspA	+
	25826	fkpB	+
	26275	\fkpB	+
	26277	ispH	+
	27227	\ispH	+
	27293	rihC	+
	28207	\rihC	+
	28374	dapB	+
	29195	\dapB	+
	29651	carA	+
	30799	\carA	+
	30817	carB	+
	34038	\carB	+
	34300	caiF	+
	34686			+	TSS	0	0.146667	0.711927	1	0.2	0.458592	1	-0.106667	0.745835	1.37283e-07	0.0666667	0.733821	3.376e-07
	34695	\caiF	+
	34781	caiE	-
	35371	\caiE	-
	35377	caiD	-
	36162	\caiD	-
	36271	caiC	-
	37824	\caiC	-
	37898	caiB	-
	39115	\caiB	-
	39244	caiA	-
	40386	\caiA	-
	40417	caiT	-
	41931	\caiT	-
	42403	fixA	+
	43173	\fixA	+
	43188	fixB	+
	44129	\fixB	+
	44180	fixC	+
	45463	fixX	+
	45466	\fixC	+
	45750	\fixX	+
	45807	yaaU	+
	47138	\yaaU	+
	47246	kefF	+
	47769	kefC	+
	47776	\kefF	+
	49631	\kefC	+
	49823	folA	+
	50302	\folA	+
	50380	apaH	-
	51222	\apaH	-
	51229	apaG	-
	51606	\apaG	-
	51609	rsmA	-
	52427	pdxA	-
	52430	\rsmA	-
	52585			-	UND	0	-0.2	0.198424	0.171882	0.186667	0.233546	0.00396927	0.0266667	0.151467	0.00761675	-8.88178e-17	0.128582	0.000203842
	53416	surA \pdxA	--
	53428			-	PSS	0	0.106667	0.239577	0.00196958	-0.0133333	0.451962	0.000749195	0.0266667	0.541626	0.000140427	0.533333	1.66485	3.78343e-07
	53533			-	UND	0	0.08	0.326599	1	0.0666667	0.169756	1	-0.286667	0.253313	0.192015	0.413333	0.322325	5.87058e-08
	53556			-	UND	0	0.106667	0.8	1.6e-05	-0.173333	0.133316	0.102278	0.0933333	0.158182	0.00454023	0.32	0.673778	0.00116838
	54569			-	PSS	0	-0.0133333	0.113138	0.242697	0.333333	0.2498	3.34836e-07	-0.213333	0.38437	1.4162e-08	-0.226667	0.453725	6.33096e-06
	54603			-	UND	0	-0.0266667	0.923764	3.0434e-06	0.266667	0.199291	1.39651e-09	-0.0933333	0.326989	1.13794e-11	0.426667	0.65549	2.5253e-13
	54700			-	UND	0	0.04	0.4	1	0.253333	0.241186	1	-0.44	0.339493	1.04018e-05	0.293333	0.278186	4.77852e-06
	54702	\surA	-
	54720			-	UND	0	0.0666667	0.711927	1	-0.04	0.125392	1	0.106667	0.184753	8.74418e-06	-0.146667	0.223947	0.000730595
	54733			-	UND	0	0.0266667	0.326599	1	-0.0266667	0.516398	1	0.266667	0.2498	8.79724e-06	-0.213333	0.436598	2.22706e-08
	54743			-	UND	0	0.0133333	0.711927	0.237342	0.0266667	0.133628	0.123145	0.12	0.17282	3.2212e-08	0.133333	0.258474	1.20726e-11
	54744			-	UND	0	0.08	0.979796	0.004502	-0.08	0.178885	0.0604045	0.4	0.387126	2.24783e-09	-0.333333	0.575362	9.08645e-12
	54755	lptD	-
	54763			-	UND	0	0.0666667	0.142374	0.209519	-0.106667	0.226565	0.000371273	0.146667	0.243375	3.25919e-05	-0.0266667	0.394537	4.49781e-08
	55297			-	UND	0	0.0266667	0.4	0.0142297	0.0133333	0.166481	0.00462311	0.293333	0.189328	4.61383e-12	-0.293333	0.347946	1.85756e-09
	55357			-	UND	0	0.04	0.4	1	-1.27676e-16	0.952997	1	0.08	0.149747	7.03128e-06	-0.0533333	0.375134	1.28165e-07
	55358			-	UND	0	0	0.326599	0.885227	0.08	0.182661	0.000639704	-0.04	0.156735	0.00178144	0.24	0.485748	3.95886e-08
	56205			-	UND	0	-0.36	0.538518	0.0710336	0.266667	0.541234	0.0129537	0.04	0.239835	0.999998	0.133333	0.11616	3.29599e-07
	57109	\lptD	-
EcoCyc (E)	57154			-	UND	0	-0.253333	0.265591	0.00286315	0.2	0.278338	0.870829	0.0666667	0.124365	0.103083	0.186667	0.156631	2.80556e-06
	57169			+	UND	0	0.2	0.163299	1	-0.28	0.236643	1	0.173333	0.216641	1.59315e-07	-0.133333	0.198662	2.85882e-05
EcoCyc (D)	57239			-	TSS	0	0	0.177388	1.99305e-11	-0.266667	0.223282	0.0990685	0.413333	0.197315	1.16982e-09	-0.293333	0.213296	0.012489
	57364	djlA	+
	58179	\djlA	+
	58474	yabP	+
	58946			+	PSS	0	-0.04	0.765957	0.972224	0.24	0.175879	5.41848e-05	-0.173333	0.28946	0.00105244	0.173333	0.631654	0.000878515
	59279	\yabP	+
	59687	rluA	-
	60346	\rluA	-
	60358	rapA	-
	61655			+	UND	0	-0.146667	0.134667	0.406579	0.266667	0.161664	0.000830944	-0.213333	0.137644	0.017704	0.0933333	0.145916	0.879203
	61656			+	UND	0	-0.28	0.26833	0.139385	0.28	0.281927	0.00376422	0.04	0.122328	2.07781e-06	-0.0266667	0.124427	5.37241e-05
	63264	\rapA	-
	63355			-	UND	0	0.413333	0.362355	7.1472e-10	-0.813333	0.512447	2.5583e-05	0.573333	0.383125	2.3493e-10	-0.133333	0.275197	2.67864e-08
	63429	polB	-
	65780	\polB	-
	65855	araD	-
	66550	\araD	-
	66835	araA	-
	68337	\araA	-
	68348	araB	-
	70048	\araB	-
	70387	araC	+
	71265	\araC	+
	71269			+	UND	0	0.146667	0.151438	1	-0.146667	0.227124	1	0.2	0.246277	3.61184e-09	0.106667	0.429879	7.71266e-12
	71270			+	UND	0	0.226667	0.172998	1	-0.24	0.248854	1	0.573333	0.359258	2.16198e-13	-0.626667	0.596888	4.09853e-12
EcoCyc (S)	71271			+	TSS	0	10.08	6.89863	7.91057e-18	-10.12	9.87228	7.92518e-19	10.2467	11.68	5.09477e-19	1.86667	26.3827	2.68193e-19
	71272			+	UND	0	0.226667	0.366525	1	-0.306667	0.445337	1	0.4	0.436349	1.10046e-08	-0.0533333	0.697424	1.97655e-12
	71351	yabI	+
	71355			+	UND	0	-0.04	0.692823	0.997756	0.2	0.195959	0.246034	-0.186667	0.266454	1	0.186667	0.226415	0.000277934
	71372			+	PSS	0	0.12	0.12	1	-0.0133333	0.197315	1	-0.2	0.211667	0.00290783	0.266667	0.274848	0.000490483
	71879			+	PSS	0	0.0666667	0.832666	1	0.106667	0.343148	1	0.0933333	0.439262	7.7118e-05	0.0133333	0.4443	4.95462e-07
	72088			+	UND	0	0.04	0.692823	1	0.0533333	0.115475	1	0.346667	0.398388	7.79728e-07	-0.893333	0.426458	0.00364776
	72089			+	PSS	0	0.0666667	0.832666	0.0611587	0.106667	0.174356	1.33752e-06	0.4	0.246727	1.78709e-10	-1.14667	0.269327	1.15953e-05
	72115	\yabI	+
	72229	thiQ	-
	72911	thiP	-
	72927	\thiQ	-
	74497	thiB	-
	74521	\thiP	-
	75480	\thiB	-
	75606			-	UND	0	0.106667	0.654828	2.68501e-13	-0.4	0.968569	4.08749e-12	0.0266667	0.83553	1.35578e-05	0.146667	0.511987	0.104047
	75644	sgrR	-
	77299	\sgrR	-
	77367	sgrS	+
	77388	sgrT	+
	77519	\sgrT	+
	77593	\sgrS	+
	77621	setA	+
	78799	\setA	+
	78848	leuD	-
	79453	\leuD	-
	79464	leuC	-
	80864	\leuC	-
	80867	leuB	-
	81958	leuA \leuB	--
	83529	\leuA	-
	83622	leuL	-
	83708	\leuL	-
	83733			-	TSS	0	-0.32	0.235514	0.133396	0.28	0.258958	0.275312	0.146667	0.117822	3.62944e-05	-0.12	0.265599	0.161488
	84368	leuO	+
	85312	\leuO	+
	85630	ilvI	+
	87354	\ilvI	+
	87357	ilvH	+
	87848	\ilvH	+
	87969			+	TSS	0	-1.16	0.786554	2.90047e-10	0.946667	0.899938	0.87094	0.253333	0.187617	0.00394877	0.04	0.153752	5.05603e-09
	88028	cra	+
	89032	\cra	+
	89589			+	TSS	0	-0.786667	1.93984	4.64355e-09	0.253333	1.193	0.0930045	0.706667	0.316365	0.000545981	3.55271e-16	0.361493	2.31997e-08
	89590			+	TSS	0	-0.24	0.354777	0.000301455	0.0933333	0.396295	0.0505924	0.413333	0.254811	0.000134292	-0.36	0.245789	5.75106e-06
	89634	mraZ	+
	90092	\mraZ	+
	90094	rsmH	+
	90682			+	PSS	0	0.0533333	0.679352	2.22071e-09	-0.706667	0.947372	0.00267642	0.786667	0.642778	3.41312e-06	-0.08	0.539976	0.0013624
	90683			+	UND	0	0.0666667	0.247656	3.32522e-08	-0.306667	0.322214	0.263032	0.293333	0.184753	0.00575623	0.0666667	0.191833	2.16006e-05
EcoCyc	90687			+	UND	0	-0.28	0.516914	3.39304e-11	-0.0266667	0.585153	0.00749236	0.333333	0.282844	0.000175325	0.08	0.132665	9.20222e-08
	91032	ftsL	+
	91035	\rsmH	+
	91397	\ftsL	+
	91413	ftsI	+
	92484			+	UND	0	0.04	0.166533	1.22894e-05	-0.213333	0.291252	0.92323	0.213333	0.147875	0.0432402	0.0933333	0.213974	4.17367e-05
	92485			+	TSS	0	-2.25333	7.86346	9.65363e-12	-2.44	7.88176	1.52539e-07	5.02667	1.19255	2.91116e-07	1.13333	2.59662	5.69049e-13
	93166	murE	+
	93179	\ftsI	+
	94650	murF	+
	94653	\murE	+
	96002	mraY	+
	96008	\murF	+
	97084	\mraY	+
	97087	murD	+
	98403	ftsW \murD	++
	99644	murG	+
	99647	\ftsW	+
	100711	\murG	+
	100765	murC	+
	102233	ddlB	+
	102240	\murC	+
	103153	\ddlB	+
	103155	ftsQ	+
	103982	ftsA	+
	103985	\ftsQ	+
	104537			+	UND	0	0.0266667	0.132796	0.814507	-0.0266667	0.147874	0.00474138	0.04	0.134664	0.000152928	0.24	0.283784	1.0186e-10
	104538			+	UND	0	0.0666667	0.832666	1	0.0933333	0.215187	1	-0.0533333	0.364727	1.28066e-08	-0.186667	0.365149	1.24777e-05
	104539			+	UND	0	0.04	0.765957	0.161017	-0.0133333	0.13267	0.00380907	0.12	0.187982	0.000343038	0.04	0.526935	2.60065e-09
EcoCyc (D)	104560			+	PSS	0	0.186667	0.328751	9.38902e-11	-0.36	0.433898	0.000211258	0.44	0.462247	5.50534e-07	-0.146667	0.711262	1.76634e-09
	105087			+	UND	0	-0.0533333	0.183251	0.0165275	0.133333	0.161661	2.09181e-05	-0.04	0.177388	1.96825e-09	0.293333	0.237769	6.50402e-12
	105244	\ftsA	+
	105305	ftsZ	+
	106456	\ftsZ	+
	106507			+	TSS	0	-0.146667	0.378685	0.00246858	0.04	0.385334	1	0.173333	0.119367	6.04656e-09	-0.04	0.122222	1
EcoCyc (D)	106508			+	TSS	0	-0.573333	0.719458	2.44151e-07	0.133333	0.743589	0.00517929	0.493333	0.242225	4.20633e-05	-0.08	0.158324	0.00345531
EcoCyc	106530			+	TSS	0	-0.76	0.311978	5.61433e-09	0.493333	0.357366	0.00443113	0.32	0.214186	3.86815e-05	-0.04	0.195982	9.26612e-05
	106557	lpxC	+
	106940			+	UND	0	-0.0666667	0.864988	0.139383	0.0933333	0.134717	0.00299852	-0.08	0.138564	0.286954	0.16	0.181843	0.00376384
	107474	\lpxC	+
	107668			+	TSS	0	-1.29333	1.22833	1.22392e-09	0.786667	1.35666	7.40499e-09	1.10667	0.675278	5.41567e-10	-0.546667	0.568457	7.70433e-11
	107705	secM	+
	108217	\secM	+
	108279	secA	+
	110984	\secA	+
	111044	mutT	+
	111433	\mutT	+
	111649	yacG	-
	111846	\yacG	-
	111856	zapD	-
	112599	coaE \zapD	--
	113219	\coaE	-
	113394			+	TSS	0	-0.28	0.389187	0.0017535	0.12	0.529654	0.0794857	0.466667	0.594441	0.000325392	-0.573333	0.669767	0.00375629
	113396			+	TSS	0	0.2	0.585928	0.737178	-0.426667	0.723694	0.0837632	0.2	0.523679	0.252866	0.0666667	0.183284	0.0052201
	113444	guaC	+
	114487	\guaC	+
	114522	hofC	-
	115714	hofB	-
	115724	\hofC	-
	117099	\hofB	-
	117109	ppdD	-
	117549	\ppdD	-
	117752	nadC	-
	118645	\nadC	-
	118733	ampD	+
	119281	ampE	+
	119284	\ampD	+
	120135	\ampE	+
	120178	aroP	-
	121551	\aroP	-
EcoCyc (D, S)	122034			+	TSS	0	0.226667	0.527922	1.83668e-14	-0.826667	0.639166	3.41204e-13	0.386667	0.69128	1.13418e-05	-0.04	0.759649	1.57494e-06
	122092	pdhR	+
	122856	\pdhR	+
	122882			+	UND	0	0.0666667	0.395552	0.000656304	-0.28	0.519487	0.0651755	0.186667	0.365878	0.133594	-0.0533333	0.151439	0.999548
	122967			+	UND	0	0.08	0.178885	1.63018e-05	-0.24	0.236643	0.282046	0.226667	0.172824	0.000175653	-0.106667	0.117758	0.0308958
EcoCyc (D, S)	122969			+	UND	0	0.546667	1.95838	3.33574e-16	-2.36	2.56926	3.10017e-15	1.54667	1.83187	9.55714e-13	-0.2	0.743266	1.4864e-10
	122975			+	UND	0	-0.213333	0.325399	7.30334e-09	0.24	0.355928	7.89178e-06	-0.146667	0.226565	0.231565	0.106667	0.159141	0.907318
	122982			+	TSS	0	-0.24	0.178885	0.0042583	0.253333	0.217868	0.00528031	-0.0533333	0.178886	0.0137488	0.0666667	0.144224	0.00731442
	122991			+	UND	0	-0.146667	0.198664	0.00012153	0.0533333	0.223785	0.979913	0.2	0.119239	3.85204e-09	-0.213333	0.8	0.991486
	123017	aceE	+
	123543			+	PSS	0	-0.0533333	0.395358	1.77855e-05	-0.04	0.489898	0.000779606	0.0266667	0.337544	0.0058613	-0.0133333	0.15834	0.993509
	123628			+	UND	0	0.16	0.357779	0.0230387	-0.426667	0.498531	0.173784	0.24	0.355528	0.945869	-1.60982e-16	0.933124	0.610574
	123672			+	UND	0	0.0533333	0.344867	0.000130393	-0.36	0.387449	0.987548	0.466667	0.196635	0.000121592	-0.32	0.122328	0.987218
	125680	\aceE	+
	125695	aceF	+
	127587	\aceF	+
	127701			+	PSS	0	-0.133333	0.156631	0.137232	0.186667	0.217869	0.00358422	-0.12	0.217677	0.0222383	0.173333	0.235219	0.00473433
EcoCyc (D)	127717			+	TSS	0	-0.6	0.525776	7.51168e-14	-0.28	0.776382	4.74081e-14	3.38667	1.67157	3.65441e-15	-3.02667	2.34799	8.80067e-15
	127718			+	TSS	0	-0.133333	0.375943	2.25771e-12	-0.0266667	0.58218	8.81487e-11	1.04667	1.95453	2.17496e-11	-1.41333	1.49526	4.18955e-10
	127719			+	UND	0	-0.0933333	0.16	2.65716e-10	0.0266667	0.239679	5.6046e-10	0.253333	0.289577	1.39265e-08	-0.22	0.375123	2.85473e-10
	127912	lpd	+
	128167			+	PSS	0	-0.68	1.79968	4.00229e-12	0.293333	1.23837	1.00244e-05	0.48	0.659779	3.40348e-08	-0.0666667	0.481664	1.00662e-05
	129336	\lpd	+
	129407	yacH	-
	131260	\yacH	-
EcoCyc (D)	131519			+	TSS	0	-1.01333	1.53249	0.000617953	0.786667	1.78273	0.806135	0.48	0.277137	8.38471e-05	0.0533333	0.869867	0.0218404
	131520			+	UND	0	-0.506667	0.477354	4.37308e-09	0.373333	0.485661	0.017123	0.213333	0.128582	8.22376e-05	0.133333	0.328234	2.97461e-07
	131615	acnB	+
	134212	\acnB	+
	134388	yacL	+
	134750	\yacL	+
	134788	speD	-
	135582	\speD	-
	135598	speE	-
	136464	\speE	-
	136570	yacC	-
	136917	\yacC	-
	137083	cueO	+
	138633	\cueO	+
	138835	gcd	-
	141225	\gcd	-
EcoCyc (D)	141261			-	UND	0	0.36	0.636658	6.86027e-07	-0.76	0.895321	0.000402004	0.373333	0.653654	0.0499859	-0.0533333	0.233239	0.911915
EcoCyc (D)	141360			+	TSS	0	-2.58667	2.2849	1.34015e-14	1.98667	2.44316	1.21814e-07	0.626667	1.11547	8.86696e-13	-0.0133333	1.23329	5.86654e-07
	141361			+	TSS	0	-0.266667	0.339513	1.56229e-06	0.0666667	0.389276	7.69999e-07	0.346667	0.433897	5.70525e-08	-0.413333	0.526118	3.67368e-05
	141431	hpt	+
	141967	\hpt	+
	142008	can	-
	142148			-	PSS	0	-0.08	0.35775	0.00132128	-0.0666667	0.437967	0.873842	0.226667	0.284423	0.00120329	-0.04	0.252647	0.00156833
	142670	\can	-
EcoCyc (D, H)	142701			-	TSS	0	-1.44	1.15227	1.10507e-12	0.733333	1.28166	1.84911e-06	1.44	0.612999	5.704e-13	-0.733333	0.71379	1.9411e-12
	142702			-	TSS	0	-0.36	0.537592	0.000129325	0.16	0.611415	0.000161776	0.24	0.296687	0.000261522	0.16	0.362215	0.000156656
	142779	yadG	+
	143702	yadH	+
	143705	\yadG	+
	144472	\yadH	+
	144577	yadI	+
	145017	\yadI	+
	145081	yadE	+
	146310	\yadE	+
	146314	panD	-
	146694	\panD	-
	146752			-	UND	0	-0.373333	0.58515	0.158762	0.306667	0.598665	0.326781	0.0666667	0.136626	0.917404	0.0266667	0.174767	0.0678358
	146968	yadD	+
	147583			+	UND	0	-0.346667	0.287519	0.00710941	0.32	0.293312	0.232034	0.0133333	0.894429	0.906763	0.0133333	0.86412	0.17096
	147870	\yadD	+
	147944	panC	-
	148795	\panC	-
	148807	panB	-
	148852			-	TSS	0	-0.586667	0.4996	7.77041e-08	0.4	0.567575	0.0714825	0.186667	0.283796	0.00529316	0.0666667	0.183713	0.00347039
	149601	\panB	-
EcoCyc (D)	149628			-	UND	0	-0.08	0.169269	5.12891e-05	0.0666667	0.199632	3.06412e-05	-0.0533333	0.144222	0.304298	0.12	0.121679	3.69171e-06
	149715	yadC	-
	150548			+	UND	0	-0.226667	0.328323	0.00253045	0.12	0.342635	0.987509	0.186667	0.136746	0.000410251	-0.106667	0.146171	0.183416
	150953	\yadC	-
	151003	yadK	-
	151599	\yadK	-
	151626	yadL	-
	152231	\yadL	-
	152243	yadM	-
	152812	\yadM	-
	152829	htrE	-
	155426	\htrE	-
	155461	yadV	-
	156201	\yadV	-
	156299	yadN	-
	156883	\yadN	-
	157253	folK	-
	157729	pcnB	-
	157732	\folK	-
	159126	\pcnB	-
	159186	gluQ	-
	160112	\gluQ	-
	160149	dksA	-
	160604	\dksA	-
	160649			-	PSS	0	-0.226667	0.488888	0.00016628	0.0533333	0.588852	0.0479941	0.186667	0.414219	0.00122503	0.226667	0.433799	0.000347927
	160650			-	PSS	0	-0.133333	0.336254	0.00184504	-0.04	0.375233	1	0.2	0.168128	3.05927e-09	0.106667	0.531622	1
	160654			-	UND	0	-0.213333	0.376652	1.1193e-09	-0.173333	0.438786	0.093332	0.453333	0.244479	7.94889e-07	0.04	0.177485	8.34423e-08
	160655			-	TSS	0	-2.70667	2.42795	1.59285e-15	1.04	2.68684	2.93534e-07	2.04	1.22679	3.10971e-13	0.546667	0.665292	1.34542e-14
	160656			-	UND	0	-0.2	0.242323	0.0801952	0.146667	0.267433	0.918314	0.0533333	0.124366	0.141279	0.16	0.153189	3.74225e-07
EcoCyc (D)	160657			-	TSS	0	-0.0666667	0.294845	2.42707e-05	-0.0133333	0.354777	2.4387e-05	0.0133333	0.216641	0.206273	0.226667	0.136626	1.16173e-05
	160782	sfsA	-
	161375			-	UND	0	-0.666667	0.398664	0.219621	0.613333	0.449566	0.998354	0.08	0.857284	0.00056242	0.133333	0.167341	1
	161486	\sfsA	-
	161501	ligT	-
	162031	\ligT	-
	162105	hrpB	+
	164534	\hrpB	+
	164730	mrcB	+
	167264	\mrcB	+
	167484	fhuA	+
	169727	\fhuA	+
	169778	fhuC	+
	170575	fhuD \fhuC	++
	171462	fhuB	+
	171465	\fhuD	+
	173444	\fhuB	+
	173602	hemL	-
	174882	\hemL	-
EcoCyc (F)	174917			-	TSS	0	0.0266667	0.356545	3.27614e-07	-0.173333	0.421618	0.782572	0.146667	0.255817	0.000257731	0.08	0.166534	1.69432e-06
	175107	clcA	+
	176528	\clcA	+
	176592			+	UND	0	0.04	0.149666	6.40622e-09	-0.12	0.18619	0.000131931	0.0533333	0.124366	0.209205	0.0266667	0.894429	0.0178698
	176610	erpA	+
	176954	\erpA	+
	177001	yadS	-
	177624	\yadS	-
	177662	btuF	-
	178455	mtn	-
	178462	\btuF	-
	179153	\mtn	-
	179179			-	TSS	0	-0.426667	0.58697	4.10943e-07	0.0266667	0.757837	8.54625e-05	0.386667	0.512713	0.187404	0.24	0.468419	6.29823e-07
	179237	dgt	+
	180754	\dgt	+
	180840			+	UND	0	0.0666667	0.732967	1	-0.0933333	0.183251	1	0.12	0.12	0.00218792	0.12	0.178885	3.09899e-10
	180841			+	UND	0	0.0666667	0.711927	1	-2.88658e-16	0.143259	1	0.12	0.232919	4.7714e-09	0.373333	0.9229	2.64165e-12
	180842			+	TSS	0	1.30667	0.583788	2.51449e-12	0.653333	1.62481	9.14454e-16	0.813333	2.92678	1.37429e-16	2	9.29144	5.51125e-17
	180843			+	TSS	0	0.693333	0.588876	3.75395e-05	0.04	1.36844	1.62146e-13	2.13333	2.16857	9.24204e-16	-0.813333	6.18256	7.91198e-16
	180844			+	UND	0	3.8	1.44468	1.52747e-16	-1.13333	3.82319	2.85219e-18	10.8933	7.63711	1.4413e-19	-8.30667	19.1976	1.39428e-19
EcoCyc (E)	180845			+	PSS	0	0.48	0.511772	7.66046e-12	1.09333	0.784545	1.10681e-15	-0.186667	1.1514	1.05121e-15	-0.693333	1.56233	6.90066e-16
	180846			+	UND	0	0.973333	0.555198	2.6498e-14	-0.253333	0.842935	8.45806e-16	1.52	0.699382	2.79091e-16	-2.17333	2.85299	6.49746e-16
	180847			+	UND	0	0.146667	0.189326	1	-0.0133333	0.275197	1	0.64	0.379473	3.83289e-14	0.213333	1.21524	4.19581e-15
	180849			+	UND	0	0.0533333	0.711927	1	0.186667	0.137562	1	0.0266667	0.324364	1.80066e-12	-0.186667	0.531877	8.86508e-10
	180850			+	PSS	0	0.106667	0.149666	7.92051e-08	0.866667	0.662655	2.23265e-14	-0.613333	0.963747	5.42886e-15	0.12	1.32197	6.63734e-15
	180851			+	PSS	0	0.773333	0.474519	6.50797e-14	4.65333	2.67135	2.54142e-18	-0.346667	2.6997	1.6268e-18	-4.53333	7.25146	3.02762e-18
	180852			+	PSS	0	0.56	0.277642	5.80659e-13	5.13333	2.49924	2.68595e-18	-0.546667	4.57767	1.90438e-18	-0.106667	11.4254	6.75563e-19
	180853			+	UND	0	0.08	0.653197	1	0.32	0.33924	1	0.626667	0.675586	7.66306e-15	0.346667	2.386	2.68765e-15
	180854			+	UND	0	0.0133333	0.239577	1	0.0533333	0.733287	1	0.346667	0.27713	8.86675e-10	-0.0133333	0.679178	2.7071e-13
	180855			+	UND	0	0	0	1	0.146667	0.134667	1	0.213333	0.318333	1	-0.266667	0.598777	2.19961e-12
	180856			+	UND	0	0.0266667	0.478835	1	0.133333	0.122853	1	0.506667	0.357867	1.84626e-13	-0.0133333	1.15358	1.91965e-14
	180857			+	UND	0	0.213333	0.244444	2.78878e-11	3.66667	0.822366	1.576e-17	5.41333	3.32184	7.76917e-19	-6.93333	7.15217	6.27573e-19
	180858			+	PSS	0	0.2	0.356545	0.000299305	2.17333	0.624957	1.23362e-16	4.50667	1.81137	3.04741e-18	-2.41333	7.32772	1.2309e-18
	180859			+	UND	0	0.12	0.232919	0.00134248	2.38667	1.11715	2.30218e-16	1.8	1.64645	1.05478e-17	-3	1.42516	1.02514e-17
	180860			+	TSS	0	0.173333	0.291252	2.47588e-06	5.08	1.12879	3.20421e-18	2.49333	2.24194	5.79298e-19	-3.78667	7.21937	3.14383e-19
	180861			+	UND	0	0	0.326599	0.906742	0.373333	0.136395	3.05239e-13	0.853333	0.396653	4.05777e-15	0.8	1.89441	3.39407e-16
	180862			+	UND	0	0.0133333	0.239577	1	0.04	0.461886	1	0.226667	0.187617	8.24522e-11	0.0266667	0.377359	1.26948e-12
	180863			+	UND	0	-0.0133333	0.239577	0.996338	0.173333	0.218426	0.292942	-0.0266667	0.346413	1	0.186667	0.292127	5.97259e-13
	180864			+	UND	0	0	0	1	0.213333	0.151438	1	0.08	0.289367	1	0.0133333	0.441293	1.96907e-13
	180865			+	PSS	0	0.12	0.124366	0.000841237	0.04	0.194594	2.67075e-09	0.88	0.241172	2.39888e-14	-1.44	0.295976	3.07136e-13
	180866			+	UND	0	0.0133333	0.239577	1	0.4	0.239421	1	0.613333	0.549998	8.54372e-15	-0.08	1.24777	1.66146e-15
	180867			+	UND	0	0	0	1	0.0133333	0.239577	1	0.106667	0.158329	1	0.186667	0.297511	1.68333e-11
	180868			+	UND	0	0	0	1	0.24	0.2	1	-0.0133333	0.321662	1	0.253333	0.375825	8.52841e-14
	180874			+	UND	0	0.0133333	0.711927	0.223691	0.133333	0.152288	8.84737e-08	-0.0266667	0.231655	1.73849e-10	0.0666667	0.313528	1.04109e-11
	180875			+	UND	0	0.04	0.516398	1	0.186667	0.16675	1	0.04	0.358528	4.51363e-12	1.11022e-15	0.515373	4.1519e-13
	180876			+	UND	0	0.0533333	0.732967	1	0.0266667	0.132665	1	0.12	0.153189	2.59856e-11	0.0266667	0.371664	4.7365e-11
	180880			+	UND	0	0.0666667	0.478835	1	-0.08	0.899738	1	0.453333	0.134662	1.20442e-11	-0.48	0.266333	7.43714e-12
	180882			+	UND	0	0.0133333	0.239577	1	0.106667	0.138565	1	1.33227e-16	0.23438	7.6845e-08	-0.106667	0.251927	2.71119e-10
	180884	degP	+
	180898			+	UND	0	0.0266667	0.478835	0.167568	0.133333	0.144775	8.77155e-06	0.04	0.291258	9.87704e-09	-0.133333	0.298155	1.95139e-09
	181210			+	UND	0	0.0266667	0.478835	1	0.133333	0.122853	1	-0.0933333	0.265393	7.31378e-08	-0.0266667	0.334211	2.70117e-08
	181344			+	UND	0	0.0266667	0.239577	1	0.0266667	0.864117	1	0.146667	0.333666	0.000953258	-0.133333	0.463694	2.37077e-06
	181382			+	UND	0	0.04	0.326599	1	0.08	0.183251	1	0.173333	0.164925	3.61898e-12	-0.253333	0.212569	1.06568e-11
	181389			+	UND	0	0.0933333	0.146593	0.0650804	0.0133333	0.289637	0.00030461	0.68	0.358516	5.37051e-14	-0.266667	1.49256	4.65155e-14
	181411			+	UND	0	0.08	0.132796	1	-0.0133333	0.194389	1	0.04	0.316232	5.39059e-06	-0.186667	0.375626	1.56197e-05
	181848			+	PSS	0	0.133333	0.115475	1	-0.0266667	0.216977	1	0.346667	0.263589	3.62656e-11	-0.293333	0.868125	2.80097e-07
	181973			+	UND	0	0	0	1	0.0266667	0.326599	1	0.506667	0.24	1	-0.626667	0.621752	3.76476e-06
	182308	\degP	+
	182463	cdaR	+
	183620	\cdaR	+
	183709	yaeH	-
	184095	\yaeH	-
	184257	yaeI	-
	185069	\yaeI	-
	185123	dapD	-
	185947	\dapD	-
EcoCyc (D)	185974			-	TSS	0	-1	0.957775	2.20116e-14	0.186667	1.17186	1.41674e-05	0.84	0.396653	8.91037e-06	-0.0533333	0.373954	5.27096e-08
	185978	glnD	-
	188650	\glnD	-
	188712	map	-
	189506	\map	-
	189551			-	UND	0	-0.0533333	0.492269	8.68736e-08	-0.226667	0.772429	0.753642	0.253333	0.613216	0.00734315	0.133333	0.197711	6.65783e-05
EcoCyc (D)	189712	tff	+	+	TSS	0	-0.133333	0.625	4.80858e-08	-0.493333	0.683685	6.28111e-09	0.92	0.326694	4.89052e-09	0.106667	0.764588	2.37498e-11
	189713			+	TSS	0	-1.77333	3.43174	3.8632e-13	-0.56	3.61392	2.70026e-13	3.57333	1.56223	1.13591e-10	-1.73333	2.71784	7.19066e-10
	189733			+	UND	0	0.04	0.326599	1	0.2	0.111534	1	0.0666667	0.555853	2.68031e-11	-0.56	0.869558	3.05048e-07
	189741			+	UND	0	0	0	1	0.106667	0.832666	1	0.0133333	0.168732	1	0.0133333	0.186196	9.94078e-12
	189760			+	PSS	0	-0.0133333	0.144223	0.00526517	0.0933333	0.194384	1.28832e-05	-1.22125e-16	0.1837	5.84024e-06	-0.146667	0.189334	3.88038e-05
	189847	\tff	+
	189853			+	UND	0	0.0666667	0.128583	2.31192e-09	-0.0933333	0.177414	5.45604e-10	-0.0266667	0.151467	6.79855e-05	0.08	0.168135	0.000139366
	189866			+	UND	0	-0.0266667	0.113138	0.137227	0.2	0.258332	1.79531e-06	-0.306667	0.315498	0.00544116	0.226667	0.281228	0.00209551
	189874	rpsB	+
	190118			+	UND	0	-0.386667	0.33746	4.69423e-09	0.186667	0.389187	6.60343e-05	0.186667	0.234379	0.000125036	0.08	0.265591	5.66926e-05
	190599	\rpsB	+	+	UND	0	-0.0533333	0.156631	3.52617e-05	0.0133333	0.169758	0.00457038	0.0533333	0.126496	0.120851	-0.0266667	0.182274	0.183549
	190605			+	PSS	0	-0.6	0.717427	0.00143351	0.52	0.735523	0.136776	0.12	0.219892	0.00429978	-0.0133333	0.193241	0.00184541
	190857	tsf	+
	191708	\tsf	+
	191855	pyrH	+
	192580	\pyrH	+
	192617			+	TSS	0	-0.88	1.55373	3.92066e-13	0.48	1.17887	2.45526e-10	0.32	0.411177	8.27836e-09	-0.0533333	0.288444	2.43495e-09
	192863			+	UND	0	-0.0133333	0.319934	2.61812e-05	-0.16	0.391865	0.24094	0.173333	0.242245	0.890512	0	0.115538	0.0122591
	192872	frr	+
	193429	\frr	+
	193521	dxr	+
	194717	\dxr	+
	194903	ispU	+
	195664	\ispU	+
	195677	cdsA	+
	196534	\cdsA	+
	196546	rseP	+
	197025			+	TSS	0	0.293333	0.228794	1	-0.28	0.389798	1	0.853333	1.1516	2.14125e-09	-1.58667	1.38845	3.4568e-08
EcoCyc (E)	197026			+	TSS	0	13.16	13.5855	1.11604e-16	-15.0133	13.6664	2.27946e-18	22.16	24.7435	2.72151e-18	-34.5467	37.5627	4.78618e-17
	197299			+	UND	0	-0.333333	0.585651	6.546e-11	0.04	0.657948	0.987549	0.333333	0.163299	0.0292755	-0.08	0.732967	0.987023
	197364			+	UND	0	0	0.765957	0.028619	0	0.145152	0.202554	0.213333	0.173518	1.99772e-08	-0.266667	0.363573	5.0726e-05
	197366			+	UND	0	0.186667	0.134667	1	-0.28	0.195975	1	0.173333	0.172827	1.29498e-07	-0.0666667	0.164792	1.48063e-05
	197369			+	UND	0	0.346667	0.222716	4.95255e-09	-0.453333	0.341962	1.69706e-09	0.733333	0.388538	1.9754e-10	-0.8	0.775993	2.87902e-07
	197370			+	TSS	0	0.906667	0.979524	3.92365e-12	-1.30667	1.44684	2.04294e-12	1.6	1.18367	1.5028e-13	-0.826667	1.22571	1.36542e-13
	197371			+	TSS	0	1.68	1.75955	1.13594e-11	-2.37333	2.49131	1.96924e-14	3.45333	1.97288	1.12866e-15	-3.22	2.14189	9.00925e-15
	197403			+	UND	0	-0.04	0.27847	5.65149e-08	0.8	0.587614	2.64925e-14	0.2	0.998514	4.18961e-15	-1.57333	1.16573	9.06951e-14
	197404			+	UND	0	0.0133333	0.4	0.286465	0.106667	0.113899	7.0587e-06	0.0933333	0.182318	1.23321e-11	-0.293333	0.339824	3.7739e-10
	197405			+	UND	0	-0.0133333	0.4	0.382893	0.106667	0.115474	0.000812681	-1.11022e-16	0.225948	4.86279e-06	0.213333	0.525618	7.82199e-07
	197495			+	PSS	0	0.12	0.894427	0.000357843	0.0533333	0.171726	7.27506e-05	0.586667	0.775558	3.01236e-10	-1.04	1.11889	3.47807e-07
	197496			+	UND	0	0.0133333	0.4	0.206117	0.04	0.765942	8.88414e-05	0.213333	0.346392	4.2028e-08	-0.493333	0.427929	1.1019e-06
	197586			+	UND	0	0.0933333	0.113138	2.81032e-10	0.32	0.253176	4.99473e-14	-0.32	0.411297	4.79134e-13	0.08	0.549424	1.35417e-13
	197587			+	PSS	0	0.0266667	0.239577	1	0.293333	0.122222	1	-0.306667	0.225933	1.56401e-08	0.213333	0.366666	2.11049e-07
	197590			+	UND	0	0.0666667	0.326599	1	0.213333	0.228626	1	-0.0533333	0.354779	1.16306e-12	-0.186667	0.454475	1.48337e-12
	197612			+	UND	0	0.0133333	0.113138	0.00318236	0.146667	0.198662	8.04333e-09	-0.2	0.223283	4.97435e-06	0.173333	0.213965	1.91827e-10
	197820			+	PSS	0	0.0533333	0.732967	0.00207312	0.0266667	0.169756	1.2552e-07	-0.146667	0.225926	0.000133502	0.186667	0.249912	3.51311e-07
EcoCyc (E)	197823			+	PSS	0	-0.04	0.711927	0.311737	0.24	0.155286	0.000347841	-0.106667	0.373892	6.44536e-06	-0.2	0.479444	0.000552206
	197874			+	UND	0	0.0266667	0.183251	0.00970131	0.2	0.156634	4.65187e-09	-0.306667	0.211662	3.21478e-06	0.44	0.511159	1.19633e-11
	197875			+	UND	0	-0.04	0.516398	0.98128	0.2	0.86412	5.69337e-07	-0.0133333	0.189692	1.07167e-08	-0.386667	0.265623	0.246079
	197876			+	UND	0	-0.0133333	0.239577	0.987138	0.213333	0.144231	0.445905	-0.146667	0.219951	1	-0.12	0.226494	1.61746e-07
	197882			+	UND	0	0.0266667	0.565685	0.130667	0.106667	0.113138	1.02835e-05	0.146667	0.319166	1.89949e-11	-0.333333	0.529156	0.000210103
	197883			+	TSS	0	-0.0266667	0.154919	0.00569048	1	0.374714	5.19194e-14	-0.16	0.838829	5.78763e-15	-1.05333	1.63528	3.26665e-11
	197898	\rseP	+
	197915			+	UND	0	0.0666667	0.953946	1	0.04	0.195239	1	-0.0666667	0.241638	6.1356e-08	0.0133333	0.26533	1.3073e-07
	197919			+	PSS	0	0.0533333	0.923764	0.00349937	0.226667	0.138564	1.82712e-09	-0.4	0.16279	1.10034e-07	0.306667	0.239594	4.68183e-11
	197928	bamA (ecfK, yaeT)	+
	197943			+	PSS	0	0.04	0.692823	1	0.146667	0.342512	1	-0.12	0.512136	0.00109763	-0.2	0.535164	0.00258562
	197981			+	TSS	0	0.68	0.476952	4.54799e-10	1.24	1.96198	2.82598e-15	-0.826667	2.97644	4.84786e-16	0.0266667	3.99975	3.36803e-16
	198100			+	UND	0	0.0266667	0.864988	0.204828	-0.0266667	0.122328	0.00897828	0.226667	0.243343	0.000235488	-0.253333	0.345438	3.7913e-06
	198102			+	UND	0	0.0133333	0.239577	1	0.0533333	0.864117	1	0.146667	0.142361	0.000249373	-0.266667	0.216641	1.5575e-05
	198141			+	TSS	0	0.04	0.132796	0.00283758	-0.0266667	0.122222	5.00378e-07	0.346667	0.24842	9.49503e-11	-0.6	0.471779	5.95531e-08
	198777			+	UND	0	0.0266667	0.4	0.0134243	0.173333	0.255793	3.20549e-06	-0.266667	0.46543	1.04384e-07	0.346667	0.553478	3.76381e-11
	198795			+	UND	0	0.0133333	0.124366	0.105469	0.0133333	0.194594	0.0756688	0.04	0.282154	3.01822e-07	-1.22125e-16	0.193616	1.18183e-09
	198909			+	PSS	0	0.16	0.46476	0.00294424	0.826667	1.98175	8.13713e-08	-1.28667	1.39995	2.12857e-05	0.22	1.45655	1.19184e-06
	198911			+	UND	0	0.0533333	0.117757	0.668159	0.0666667	0.262942	0.000794078	0.0533333	0.488627	9.93711e-08	-0.466667	0.577824	0.204827
	199267			+	UND	0	-0.0666667	0.169269	0.876128	0.16	0.215637	0.000750802	-0.0533333	0.239418	0.00228794	2.22045e-17	0.32414	9.02416e-05
	199406			+	UND	0	0.0666667	0.183251	0.113274	-0.106667	0.156634	0.230045	0.2	0.194594	2.72458e-07	0	0.371997	3.37884e-08
	199483			+	PSS	0	0.0266667	0.239577	1	0.0533333	0.461546	1	0.12	0.195855	7.18346e-06	-0.2	0.478387	0.000913277
	199490			+	PSS	0	0.0533333	0.923764	1	0.0933333	0.156631	1	0.24	0.156631	6.39664e-07	-0.553333	0.288287	2.31321e-08
	199555			+	PSS	0	-0.04	0.8	0.257997	0.186667	0.183251	0.000383573	0.186667	0.128582	8.48198e-07	-0.32	0.679475	4.52693e-06
	199634			+	UND	0	-3.9968e-17	0.565685	0.296264	0.08	0.8	9.58501e-09	0.0133333	0.149667	1.60272e-07	-0.0666667	0.236644	3.29129e-09
	199668			+	UND	0	0.0133333	0.692823	0.277151	0.36	0.329849	3.38186e-09	-0.553333	0.461697	3.93536e-10	0.266667	0.378962	3.20082e-08
	199748			+	TSS	0	0.12	0.254352	3.33254e-12	1.76	0.735863	1.92944e-16	-1.45333	1.17167	5.38351e-16	-0.173333	1.21195	4.04174e-16
	199809			+	UND	0	0.0266667	0.183251	0.14129	0.426667	0.453136	4.99189e-10	-0.466667	0.654116	7.41847e-10	0.133333	0.645115	7.26121e-13
	199988			+	UND	0	0.0133333	0.239577	1	0.0133333	0.765945	1	0.08	0.213965	0.00385711	0.133333	0.275197	2.27736e-06
	200138			+	UND	0	0.0133333	0.169756	0.183533	0.413333	0.742842	6.91193e-09	0.186667	1.49115	5.18653e-14	-1.41333	0.924914	2.38289e-08
	200158			+	UND	0	0.0133333	0.239577	1	0.0933333	0.128582	1	0.0533333	0.198662	2.35193e-08	-0.226667	0.217613	1.60994e-05
	200164			+	UND	0	0.0133333	0.239577	1	0.0533333	0.923764	1	0.146667	0.174356	1.46387e-10	-0.28	0.219892	1.98712e-09
	200188			+	UND	0	0.0266667	0.326599	1	0.08	0.113142	1	-0.04	0.183358	1.66025e-09	-0.0266667	0.239411	1.56835e-09
	200210			+	UND	0	0.0133333	0.516398	0.889841	0.2	0.233239	5.34826e-07	0.0933333	0.432164	4.97007e-12	-0.466667	0.524168	4.16376e-11
	200211			+	UND	0	0.04	0.765957	0.00835504	0.18	0.15535	3.61454e-09	0.253333	0.497192	1.75486e-12	-0.646667	0.846146	5.8668e-09
	200212			+	PSS	0	-0.16	0.596888	7.74532e-14	6.61333	1.78881	1.39374e-18	-1.49333	4.84755	1.77235e-18	-4.8	11.3164	4.43384e-18
	200213			+	TSS	0	0.133333	0.193384	6.64051e-08	0.293333	0.312512	3.16347e-14	0.466667	0.765446	8.02468e-15	-1.05333	1.47254	1.58673e-13
	200214			+	UND	0	-0.0266667	0.478835	0.99826	0.146667	0.195427	0.224292	-0.04	0.158325	1	-0.0666667	0.255359	3.08108e-05
	200246			+	UND	0	0.0133333	0.478835	0.0221659	0.16	0.228968	1.65699e-07	-1.55431e-16	0.356278	2.76927e-11	-0.04	0.381577	2.85661e-12
	200256			+	PSS	0	-0.0133333	0.239577	0.987138	0.12	0.747657	0.445905	0.173333	0.131618	1	-0.306667	0.217997	4.16368e-06
	200264			+	TSS	0	-0.04	0.765957	0.992538	0.213333	0.183227	1.54705e-11	0.133333	0.271371	5.16357e-12	-0.506667	0.383675	2.18116e-10
	200299			+	UND	0	-0.0133333	0.252646	0.00302044	0.56	0.512929	5.98368e-13	1.29333	1.84931	1.06111e-15	-2.12	1.64385	2.69466e-15
	200300			+	UND	0	0.0133333	0.239577	1	0.04	0.733287	1	0.426667	0.174357	6.62865e-13	-0.253333	0.368725	1.1775e-12
	200301			+	UND	0	-0.0133333	0.239577	0.967684	0.04	0.461546	0.587068	0.4	0.8186	1	-0.173333	0.373868	3.20633e-10
	200303			+	UND	0	0	0	1	0.0133333	0.239577	1	0.28	0.126491	1	-0.12	0.273847	7.96762e-12
	200307			+	UND	0	0.0266667	0.478835	1	-0.0266667	0.899738	1	0.226667	0.158325	1.71777e-10	-0.133333	0.299124	4.3234e-11
	200360	\bamA	+
	200364			+	UND	0	-0.0666667	0.653197	1	0.2	0.183914	4.44216e-07	0.106667	0.291595	1	-0.44	0.412238	1.46165e-05
	200377			+	UND	0	-0.0133333	0.239577	0.987138	0.28	0.333693	0.445905	0.173333	0.554295	1	-0.72	0.659413	7.60756e-11
	200378			+	PSS	0	0.0266667	0.565685	0.0129147	0.293333	0.246629	5.63865e-09	0.52	0.613321	1.68432e-12	-0.24	1.38475	1.40914e-13
	200379			+	UND	0	-0.0133333	0.478835	0.29751	0.0266667	0.873279	0.843325	0.133333	0.18619	8.4545e-06	-3.55271e-16	0.291244	6.99767e-10
	200476			+	UND	0	0	0	1	0.16	0.132665	1	-0.133333	0.212916	1	0.133333	0.319934	4.86932e-08
	200482	skp	+
	200959			+	UND	0	-0.0266667	0.732967	0.92977	0.146667	0.158312	6.45864e-06	0.0533333	0.329394	2.00685e-05	-0.146667	0.452548	4.52743e-11
EcoCyc (E)	200960			+	PSS	0	0.04	0.142374	7.90893e-06	0.56	0.49639	3.2845e-10	-0.146667	1.45232	4.46816e-12	0.293333	1.35591	1.37387e-12
	200962			+	UND	0	-0.0266667	0.478835	0.997312	0.56	0.918839	0.262547	-0.986667	1.28279	1	0.44	0.992122	0.0115601
	200967	\skp	+
	200971	lpxD	+	+	PSS	0	0	0.326599	0.88285	0.173333	0.653197	1.21596e-06	-0.04	0.157129	1.394e-06	0.0933333	0.247972	3.67531e-11
	201081			+	UND	0	0.0266667	0.653197	0.23805	0.0533333	0.273556	0.0935294	0.0533333	0.355477	0.000338787	-3.10862e-16	0.28486	2.24328e-06
	201879			+	UND	0	0.0533333	0.711927	1	-0.04	0.111976	1	0.12	0.174425	0.000896019	-0.0666667	0.32827	1.07315e-07
	201899			+	UND	0	0.0666667	0.979796	0.00713204	0.12	0.219485	5.69018e-11	-0.0533333	0.421896	1.09797e-06	-0.0933333	0.586516	2.52287e-11
	201996	\lpxD	+
	202066			+	UND	0	0.0533333	0.12	0.171367	0.04	0.188257	4.24745e-06	0.2	0.223553	2.61849e-12	-0.373333	0.337543	6.06534e-09
	202073			+	TSS	0	-0.0533333	0.346392	2.48581e-08	-0.106667	0.351757	0.000107692	0.106667	0.281666	0.298255	0.0933333	0.145916	0.0158285
	202074			+	PSS	0	-0.133333	0.777689	1.19886e-12	-0.253333	1.12719	1.79056e-11	0.48	0.722219	3.41778e-12	0.32	0.785817	5.38657e-13
	202075			+	TSS	0	-0.0266667	0.688243	3.1395e-06	-0.24	0.761458	0.000544824	0.186667	0.344125	0.878907	0.253333	0.227451	1.09212e-07
	202101	fabZ	+
	202279			+	PSS	0	-0.0666667	0.132665	0.333454	0.133333	0.138565	0.00248893	-0.0133333	0.952997	0.00196108	-3.10862e-16	0.136983	1.26424e-05
	202556	\fabZ	+
	202560	lpxA	+
	203348	lpxB \lpxA	++
	203797			+	UND	0	0.0133333	0.692823	0.249146	-0.0133333	0.136397	0.847604	0.346667	0.273848	2.10263e-11	-0.506667	0.34254	3.41611e-08
	204493	rnhB	+
	204496	\lpxB	+
	204501			+	PSS	0	0.0466667	0.856349	0.110601	0.146667	0.319289	0.000737464	-0.153333	0.462158	0.000274906	-0.153333	0.473366	0.0010099
	205089	\rnhB	+
	205126	dnaE	+
	208414			+	UND	0	0.04	0.4	1	0.0533333	0.237767	1	0.0666667	0.445421	0.0169461	-0.173333	0.547966	1.81309e-05
	208415			+	UND	0	-0.04	0.692823	0.999434	0.106667	0.18327	0.147158	0.0533333	0.144222	1	2.22045e-17	0.193218	0.000273255
	208608	\dnaE	+
	208621	accA	+
	208718			+	PSS	0	-0.0933333	0.689863	4.42682e-06	-2.4869e-15	0.928863	6.6117e-05	0.346667	0.769822	3.94897e-09	-0.08	1.45116	4.92717e-07
	208841			+	PSS	0	-0.62	0.924265	0.000256803	0.52	1.17579	0.000127505	0.193333	0.467544	0.000167218	0.08	0.312832	7.06261e-05
	208850			+	UND	0	-0.186667	0.175879	0.183471	0.28	0.342366	0.000581659	-0.16	0.352555	0.000108584	0.0933333	0.234388	4.24006e-05
	209580	\accA	+
	209679	ldcC	+
	211820	\ldcC	+
	211877	yaeR	+
	212266	\yaeR	+
	212331	tilS	+
	213629	\tilS	+
	213678	rof	-
	213925	yaeP	-
	213932	\rof	-
	214125	\yaeP	-
	214161			-	TSS	0	-0.16	0.352515	0.000668428	0.0266667	0.354245	0.960397	0.133333	0.461882	0.478777	0.0533333	0.611193	0.00367013
	214291	yaeQ	+
	214833	arfB	+
	214836	\yaeQ	+
	215255	\arfB	+
	215269	nlpE	+
	215979	\nlpE	+
	216179	yaeF	-
	217003	\yaeF	-
	217057	proS	-
	217202			-	UND	0	0.266667	0.287519	3.88206e-07	-0.653333	0.38877	0.00815088	0.573333	0.383697	0.0370307	-0.32	0.486296	0.0027816
	218775	\proS	-
	218887	tsaA	-
	219591	rcsF	-
	219594	\tsaA	-
	219995	\rcsF	-
	220113	metQ	-
	220928	\metQ	-
	220968	metI	-
	221614	metN	-
	221621	\metI	-
	222645	\metN	-
EcoCyc (D)	222712			-	TSS	0	-0.146667	0.314963	0.000670186	0.04	0.387128	0.00134531	0.293333	0.395552	7.92142e-06	-0.36	0.461325	0.0916691
EcoCyc	222806			+	UND	0	-0.493333	0.252982	5.25925e-10	0.4	0.268328	2.8495e-05	0.226667	0.26962	8.12179e-06	-0.293333	0.354253	0.000177086
	222833	gmhB	+
	223408	\gmhB	+
	229167	dkgB	+
	229967	yafC	-
	229970	\dkgB	+
	230881	\yafC	-
	231122	yafD	+
	231922	\yafD	+
	231926	yafE	+
	232549	\yafE	+
	232597	mltD	-
	233955	\mltD	-
	233978			-	TSS	0	-0.0266667	0.122239	4.79025e-05	-0.04	0.166568	0.00438854	0.0933333	0.149666	0.000154803	-0.0666667	0.142361	0.212727
	234027	gloB	-
	234782	\gloB	-
	234785			+	TSS	0	-0.106667	0.237767	0.000755706	-0.0533333	0.283784	0.979902	0.173333	0.163299	0.321741	0.0266667	0.923773	0.0712387
	234816	yafS	+
	235535	rnhA	-
	235538	\yafS	+
	236002	\rnhA	-
	236021			+	TSS	0	-0.293333	0.311555	3.23339e-05	0.24	0.316649	1.37345e-06	0.0533333	0.153198	0.825216	0.04	0.212923	5.21283e-05
	236067	dnaQ	+
	236798	\dnaQ	+
	236909			+	UND	0	1.24345e-16	0.122239	1.53501e-06	-0.0266667	0.166568	0.00221718	0.146667	0.191833	1.3056e-07	-0.2	0.2498	8.62496e-05
	237335	yafT	+
	238120	\yafT	+
	238257	ykfM	-
	238736	\ykfM	-
	238746	yafU	-
	239102	\yafU	-
	239106	yafF	+
	239378	\yafF	+
	239419	yafV	-
	240189	\yafV	-
	240343	ivy	+
	240816	\ivy	+
	240859	fadE	-
	243303	\fadE	-
	243512			+	UND	0	-0.213333	0.948543	1.67237e-10	-0.48	1.14636	0.00267438	0.72	0.653333	9.54829e-07	0.186667	0.144222	5.67919e-11
	243543	gmhA	+
	244121	\gmhA	+
	244327	yafJ	+
	245065	yafK	-
	245094	\yafJ	+
	245805	\yafK	-
	245961	yafQ	-
	246239	\yafQ	-
	246242	dinJ	-
	246502	\dinJ	-
	246530			-	UND	0	-0.253333	0.169269	0.00219633	0.253333	0.195581	0.00216232	-5.68434e-16	0.164924	0.0068094	-0.0133333	0.164924	0.000321393
	246531			-	TSS	0	-0.0133333	0.169756	3.03938e-05	-0.08	0.226274	0.00517928	0.146667	0.175879	0.00293907	0.08	0.242212	2.75019e-07
	246712	yafL	+
	247461	\yafL	+
	247637	rayT	+
	248134	\rayT	+
	248358	lfhA	-
	250070	\lfhA	-
	250072	lafU	+
	250827	\lafU	+
	250898	dinB	+
	251953	\dinB	+
	252005	yafN	+
	252298	\yafN	+
	252301	yafO	+
	252699	\yafO	+
	252709	yafP	+
	253161	\yafP	+
	253479	ykfJ	+
	253685	\ykfJ	+
	253702	prfH	+
	254202	\prfH	+
	254259	pepD	-
	255716	\pepD	-
EcoCyc (D)	255774			-	UND	0	-0.0933333	0.399333	8.92959e-12	-0.226667	0.42834	0.00836797	0.266667	0.163299	0.999999	0.08	0.611193	1.10338e-07
	255805			-	UND	0	-0.186667	0.243315	1.35508e-07	0.04	0.291245	0.187167	0.2	0.198662	0.0618586	-0.12	0.158325	0.270729
EcoCyc	255807			-	UND	0	-0.213333	0.27279	0.00652746	0.146667	0.289851	0.310739	0.0933333	0.138565	0.842476	-0.0266667	0.142361	0.00940189
	255977	gpt	+
	256435	\gpt	+
EcoCyc (D)	256502			+	TSS	0	-0.36	0.75359	1.90073e-06	0.2	0.772366	0.847499	0.346667	0.221182	1.07454e-06	-0.32	0.221516	0.0827591
	256527	frsA	+
	257771	\frsA	+
EcoCyc (D, S)	257810			+	TSS	0	-1.49333	1.71829	9.97408e-09	1.29333	1.13142	5.09295e-06	0.36	0.411664	3.36754e-11	0.4	0.415513	1.39387e-10
	257829	crl	+
	259006	\crl	+
	259045	phoE	-
	260100	\phoE	-
	260350			+	TSS	0	-0.133333	0.134667	3.95538e-07	-0.0133333	0.165355	1	0.2	0.11325	1	-0.04	0.144754	1
	260388	proB	+
	261491	\proB	+
	261503	proA	+
	262756	\proA	+
	263150	ykfN	-
	263212	\ykfN	-
	263328	ykfI	-
	263669	\ykfI	-
	263690	yafW	-
	264007	\yafW	-
	264026	ykfH	-
	264247	\ykfH	-
	264256	ykfG	-
	264732	\ykfG	-
	264748	yafX	-
	265206	\yafX	-
	265304	ykfF	-
	265543	\ykfF	-
	265620	ykfB	-
	266087	\ykfB	-
	266110	yafY	-
	266553	ykfL \yafY	--
	266774	\ykfL	-
	266776	ykfK	-
	266967	\ykfK	-
	267184	yafZ	-
	268005	\yafZ	-
	268097	ykfA	-
	268960	\ykfA	-
	269289	perR	-
	270182	\perR	-
	270278	insN	+
	270603	insI1	+
	271754	\insI1	+
	272189	\insN	+
	272580	eyeA	+
	272654	\eyeA	+
	272847	ykfC	+
	273954	\ykfC	+
	274101	insH1	-
	275117	\insH1	-
	275325	mmuP	+
	276715	mmuM	+
	276728	\mmuP	+
	277647	\mmuM	+
	277756	afuC	-
	278802	\afuC	-
	278814	afuB	-
	279161	\afuB	-
	279178	insB1	-
	279600	insA	-
	279681	\insB1	-
	279875	\insA	-
	279931	insI1	+
	280104	\insI1	+
	280114	insX	-
	280362	\insX	-
	280427	yagB	-
	280735	\yagB	-
	280829	yagA	-
	281983	\yagA	-
	282278	yagE	+
	283186	\yagE	+
	283201	yagF	+
	285168	\yagF	+
	285395	yagG	+
	286777	\yagG	+
	286789	yagH	+
	288399	\yagH	+
	288404	yagI	-
	289162	\yagI	-
	289301	argF	-
	290305	\argF	-
	290429	ykgS	+
	290633	\ykgS	+
	290649	insB1	-
	291071	insA	-
	291152	\insB1	-
	291346	\insA	-
	291404	yagJ	+
	292231	\yagJ	+
	292322	yagK	-
	292948	\yagK	-
	293220	yagL	-
	293918	\yagL	-
	293945	yagM	-
	294799	\yagM	-
	295139	yagN	-
	295579	\yagN	-
	295696	intF	-
	297096	\intF	-
	297381	yagP	-
	297714	ykgT	-
	297719	\yagP	-
	297770	paoD	-
	297791	\ykgT	-
	298726	\paoD	-
	298736	paoC	-
	300931	paoB	-
	300934	\paoC	-
	301884	paoA	-
	301887	\paoB	-
	302573	\paoA	-
	302959			+	TSS	0	-0.666667	0.448999	0.229118	0.653333	0.457829	0.228695	-0.0133333	0.158352	0.968334	0.0666667	0.653197	0.00300943
	302991	yagU	+
	303605	\yagU	+
	303853	ykgJ	-
	304182	\ykgJ	-
	304495	ecpE	-
	305174	ecpD	-
	305205	\ecpE	-
	306807	ecpC	-
	306817	\ecpD	-
	306829			-	TSS	0	0.213333	0.298983	0.000668165	-0.4	0.424695	0.00234497	0.386667	0.315817	0.000253272	-0.28	0.391136	0.000799487
	309332	\ecpC	-
	309358	ecpB	-
	310026	\ecpB	-
	310084	ecpA	-
	310671	\ecpA	-
	310746	ecpR	-
	311336	\ecpR	-
	312112	ykgL	+
	312339	\ykgL	+
	312374	ykgO	-
	312514	ykgM \ykgO	--
	312777	\ykgM	-
	313141	ykgR	-
	313242	\ykgR	-
	313716	ykgP	-
	313805	\ykgP	-
	314357	eaeH	+
	315228	\eaeH	+
	315291	insE1	+
	315587	insF1	+
	315590	\insE1	+
	316453	\insF1	+
	316486	ykgA	-
	317169	\ykgA	-
	317439	ykgQ	+
	317567	\ykgQ	+
	317726	rclC	-
	318319	\rclC	-
	318331	rclB	-
	318567	\rclB	-
	318676	rclA	-
	320001	\rclA	-
	320227	rclR	+
	321081	\rclR	+
	321608	ykgE	+
	322327	\ykgE	+
	322338	ykgF	+
	323758	ykgG	+
	323765	\ykgF	+
	324453	\ykgG	+
	324696	ykgH	-
	325364	\ykgH	-
	325577	betA	-
	327247	\betA	-
	327261	betB	-
	328733	\betB	-
	328747	betI	-
	329334	\betI	-
EcoCyc (D)	329359			-	TSS	0	-0.186667	0.573178	1.54232e-08	0.0266667	0.634543	8.80791e-06	0.133333	0.294176	0.00191476	0.266667	0.295748	9.70478e-09
EcoCyc (D)	329421			+	TSS	0	-0.306667	0.515891	2.24826e-05	0.213333	0.535815	0.0687814	0.0533333	0.174797	0.872545	0.186667	0.128582	0.000221134
	329463	betT	+
	331496	\betT	+
	332371	yahA	+
	333459	\yahA	+
	333501	yahB	-
	334433	\yahB	-
	334525	yahC	-
	335022	\yahC	-
	335280	yahD	+
	335885	\yahD	+
	335925	yahE	+
	336778	yahF	+
	336788	\yahE	+
	338325	yahG \yahF	++
	339743	\yahG	+
	340165	yahI	+
	341115	\yahI	+
	341125	yahJ	+
	342507	\yahJ	+
	342884	yahK	+
	343933	\yahK	+
	344176	yahL	+
	344991	\yahL	+
	345251			+	TSS	0	-0.106667	0.329163	0.868915	0.0666667	0.363797	0.541983	0.0533333	0.183719	0.117579	0.12	0.215468	0.0015116
EcoCyc (D)	345252			+	TSS	0	-0.333333	0.872697	1.32731e-09	-0.253333	1.11138	0.00179627	1.10667	0.759143	3.27875e-07	-0.6	0.778128	1.50393e-06
	345254			+	TSS	0	-0.0133333	0.229783	2.3671e-06	-0.12	0.273252	0.000498346	0.36	0.362215	0.000301155	-0.16	0.487716	2.57715e-08
	345404	yahM	+
	345649	\yahM	+
	345666	yahN	-
	346337	\yahN	-
	346484	yahO	+
	346759	\yahO	+
	346857	prpR	-
	348443	\prpR	-
	348682	prpB	+
	349572	\prpB	+
	350012	prpC	+
	351181	\prpC	+
	351215	prpD	+
	352666	\prpD	+
	352706	prpE	+
	354592	\prpE	+
	354922	codB	+
	356171	codA	+
	356181	\codB	+
	357454	\codA	+
	357791	cynR	-
	358690	\cynR	-
	358799	cynT	+
	359458	\cynT	+
	359489	cynS	+
	359959	\cynS	+
	359992	cynX	+
	361146	\cynX	+
	361249	lacA	-
	361860	\lacA	-
	361926	lacY	-
	363179	\lacY	-
	363231	lacZ	-
	366305	\lacZ	-
	366428	lacI	-
	366477			-	PSS	0	0.08	0.195959	0.00554766	-0.0933333	0.271488	0.000899602	-0.0933333	0.192191	0.367102	0.226667	0.113138	0.00225369
	367472			-	TSS	0	0.12	0.8	1	0.0133333	0.193864	1	-0.12	0.417835	0.000373033	0.253333	0.518911	1.78807e-08
	367510	\lacI	-
	367535			-	TSS	0	-0.313333	0.576773	1.11666e-06	-0.1	0.618783	0.0114993	0.546667	0.367374	0.00012057	0.04	0.537675	1.51384e-05
	367536			-	TSS	0	-2.45333	6.99429	1.7824e-14	-2.14	8.22678	2.60751e-06	5.14667	4.51124	1.54432e-08	0.473333	2.97786	7.6072e-10
	367537			-	TSS	0	-0.453333	1.92339	4.8265e-14	-0.453333	1.33448	2.07487e-10	1.54667	0.836674	4.72233e-11	-0.346667	0.913416	2.35177e-10
EcoCyc	367539			-	TSS	0	0.0533333	0.233239	0.000670186	-0.266667	0.355557	1	0.226667	0.198662	2.93736e-10	0.16	0.178377	1
	367587	mhpR	-
	368420	\mhpR	-
	368611	mhpA	+
	370275	\mhpA	+
	370277	mhpB	+
	371221	\mhpB	+
	371239	mhpC	+
	372105	\mhpC	+
	372115	mhpD	+
	372921	mhpF	+
	372924	\mhpD	+
	373868	mhpE	+
	373871	\mhpF	+
	374881	\mhpE	+
	375459	mhpT	+
	376670	\mhpT	+
	376772	yaiL	+
	377311	\yaiL	+
	377535	frmB	-
	378368	\frmB	-
	378462	frmA	-
	379571	\frmA	-
	379606	frmR	-
	379881	\frmR	-
	380069	yaiO	-
	380842	\yaiO	-
	380844	yaiX	-
	381323			+	TSS	0	-0.151111	0.933517	1	0.164444	0.977756	1	-0.04	0.432526	1	0.0822222	0.981181	1
	381351	insC1	+
	381674	insD1	+
	381716	\insC1	+
	382579	\insD1	+
	382739	yaiP	-
	382872	\yaiX	-
	383935	\yaiP	-
	384059	yaiS	-
	384616	\yaiS	-
	385232	tauA	+
	386194	\tauA	+
	386207	tauB	+
	386971	tauC	+
	386974	\tauB	+
	387795	tauD	+
	387798	\tauC	+
	388646	\tauD	+
	388753	hemB	-
	389727	\hemB	-
EcoCyc (D)	389752			-	TSS	0	0.0133333	0.299333	1.49213e-08	-0.266667	0.464939	0.0537095	0.24	0.388394	0.00459468	0.133333	0.276343	2.3232e-05
	390251	yaiT	+
	391739	insF1	-
	392602	insE1	-
	392605	\insF1	-
	392901	\insE1	-
	394418	\yaiT	+
	394506	yaiV	+
	395129	\yaiV	+
	395130	ampH	-
	396287	\ampH	-
EcoCyc (E)	396553			+	UND	0	0.0933333	0.166446	1	-0.12	0.165399	1	0.0933333	0.174356	0.00115359	0.12	0.356277	1.14397e-07
	396554			+	TSS	0	3.08	2.35729	1	-4.6	3.48544	1	6.76	5.84527	8.9884e-13	-1.26667	12.3666	1.32806e-16
	396556			+	UND	0	0.08	0.516398	1	-0.0933333	0.979796	1	0.44	0.367312	2.79284e-07	-0.413333	0.532151	3.72512e-12
	396639	sbmA	+
	397237			+	PSS	0	0.186667	0.1837	1	0.133333	0.428893	1	-0.0266667	0.611796	3.18132e-05	-0.653333	0.75639	0.000121373
	397830			+	UND	0	0.0266667	0.478835	1	0.186667	0.276334	1	-0.04	0.441128	1.28097e-06	-0.146667	0.485788	5.80937e-07
	397859	\sbmA	+
	397872	yaiW	+
	398966	\yaiW	+
	399025	yaiY	-
	399333	\yaiY	-
	399593	yaiZ	+
	399805	\yaiZ	+
	399829	ddlA	-
	400923	\ddlA	-
EcoCyc	401363			+	UND	0	-0.253333	0.569912	0.000290533	-0.0266667	0.623115	0.17688	0.666667	0.375825	4.86326e-07	-0.0133333	0.737142	5.22288e-09
	401386	iraP	+
	401646	\iraP	+
	401747	phoA	+
	403162	\phoA	+
	403281	psiF	+
	403601	\psiF	+
	403703	yaiC	+
	404818	\yaiC	+
	404835	proC	-
	405644	\proC	-
EcoCyc	405684			-	TSS	0	-0.64	0.64828	8.67396e-05	0.64	0.671421	0.771421	0.0266667	0.246277	7.64459e-07	0.08	0.234379	1.87903e-07
	405764	yaiI	+
	406222	\yaiI	+
	406405	aroL	+
	406929	\aroL	+
	406979	yaiA	+
	407170	\yaiA	+
	407428	aroM	+
	408105	\aroM	+
EcoCyc	408148			+	TSS	0	-0.48	0.571742	0.000591474	0.386667	0.518614	0.00302379	0.146667	0.153195	7.3467e-05	-0.0266667	0.142365	0.000805282
	408177	yaiE	+
	408461	\yaiE	+
	408609	ykiA	+
	408950	\ykiA	+
	409108	rdgC	-
	410019	\rdgC	-
	410144	mak	+
	411052	\mak	+
	411297	araJ	-
	412481	\araJ	-
	412607	sbcC	-
	415750	sbcD	-
	415753	\sbcC	-
	416952	\sbcD	-
	417142	phoB	+
	417240			+	UND	0	0.253333	0.197315	1	0.466667	0.559656	1	-0.0266667	0.727376	3.17603e-15	-0.306667	1.58365	3.57899e-15
	417241			+	UND	0	0.32	0.164924	1	0.08	0.352515	1	0.12	0.493694	1.7212e-14	-0.2	0.752242	2.32251e-14
	417831	\phoB	+
	417889	phoR	+
	419184	\phoR	+
	419591	brnQ	+
	420910	\brnQ	+
	420986	proY	+
	422359	\proY	+
	422518	malZ	+
	424332	\malZ	+
	424337	acpH	-
	424918	\acpH	-
	425011	queA	+
	426081	\queA	+
	426137	tgt	+
	427203			+	UND	0	-0.346667	0.516859	7.62103e-11	0.0533333	0.568569	0.0975301	0.226667	0.263312	0.999802	0.133333	0.117757	5.6149e-05
	427204			+	TSS	0	-0.8	2.68477	9.51546e-16	-1.22667	3.28641	3.57266e-10	2.08	1.97499	1.21333e-12	0.0266667	0.813224	5.05154e-12
EcoCyc	427205			+	TSS	0	-0.213333	0.434511	7.6128e-12	-0.04	0.497514	0.000762418	0.28	0.281994	2.48915e-07	-0.0933333	0.278464	0.171718
	427215			+	UND	0	-0.0266667	0.564269	1.31889e-05	-0.2	0.781836	0.00174498	0.133333	0.438432	0.990867	0.133333	0.119239	0.00274454
	427216			+	UND	0	0.0533333	0.375233	0.000551772	-0.32	0.4899	0.317039	0.266667	0.322794	0.928757	0.0266667	0.894429	0.00734834
	427264	\tgt	+
	427287	yajC	+
	427619	\yajC	+
	427647	secD	+
	427658			+	UND	0	-0.08	0.39598	0.12341	-0.0133333	0.478895	0.837175	0.0533333	0.29666	0.687987	0.12	0.156735	0.00208624
	427659			+	PSS	0	-0.0533333	0.638253	0.00083811	-0.173333	0.772886	0.11085	0.24	0.463335	0.00248807	0.0666667	0.323316	0.079403
	427660			+	PSS	0	-0.2	0.347248	6.24666e-08	-0.853333	1.48946	0.00059274	1.12	1.46852	0.000758688	0.213333	0.754586	0.000228583
	429494	\secD	+
	429505	secF	+
	430476	\secF	+
	430576			+	PSS	0	-0.24	0.225926	0.00283242	0.24	0.234379	0.00185085	-2.84217e-16	0.177388	0.131699	0.04	0.282843	0.0810815
	430605	yajD	+
	430952	\yajD	+
	431129	tsx	-
	432013	\tsx	-
	432050			-	UND	0	-0.64	0.856972	0.00116293	0.506667	0.859917	1	0.146667	0.747657	1.04644e-09	-0.0266667	0.326614	1
	432076			-	UND	0	-0.52	0.545382	4.66898e-05	0.373333	0.564479	1	0.146667	0.146593	7.13297e-13	0.0133333	0.239577	1
	432088			-	TSS	0	-2.42667	1.23935	3.67593e-09	1.96	1.24458	0.987549	0.493333	0.187617	0.00280991	0.12	0.144816	2.80174e-05
	432089			-	TSS	0	-7.30667	4.73726	2.78782e-13	6.52	4.77812	0.0720531	0.786667	0.643325	0.00762317	0.466667	0.245671	1.41338e-06
	432090			-	TSS	0	-0.52	0.385559	0.00360747	0.4	0.411178	1	0.133333	0.1466	1.47792e-08	0.0533333	0.765945	1
EcoCyc (D)	432091			-	TSS	0	-1.16	0.964966	9.86663e-08	0.946667	0.971312	0.979915	0.213333	0.115475	0.371572	0.186667	0.113142	0.00013519
	432312	yajI	-
	432851	\yajI	-
	432975			+	UND	0	-0.44	0.533112	0.000816984	0.346667	0.546947	0.0852014	0.146667	0.16222	0.00279337	0.133333	0.363189	0.000623324
	433002	nrdR	+
	433451	\nrdR	+
	433455	ribD	+
EcoCyc (H)	434504			+	TSS	0	-0.133333	0.144754	1	0.133333	0.144754	2.42231e-09	0.186667	0.864988	1	-0.146667	0.194784	1
	434511			+	PSS	0	0.186667	0.434275	1.63867e-11	-0.506667	0.612578	9.6632e-06	0.76	0.684635	2.72322e-09	-0.706667	0.712569	9.21214e-10
	434558	\ribD	+
	434593			+	UND	0	-0.16	0.177388	0.000567275	1.11022e-16	0.214144	0.987542	0.173333	0.182661	0.0607705	0.0933333	0.213363	0.151984
	434647	ribE	+
	435117	\ribE	+
	435137	nusB	+
	435556	\nusB	+
	435634	thiL	+
	436589	pgpA	+
	436611	\thiL	+
	437107	\pgpA	+
	437161	yajO	-
	437429			-	UND	0	0.16	0.187766	1	-0.2	0.42268	1	0.08	0.454824	2.60457e-07	0.173333	0.189462	3.78513e-08
	438135	\yajO	-
	438162			+	TSS	0	-0.143333	0.135277	0.000259031	-0.05	0.144338	0.200134	0.238889	0.774836	0.000211921	-0.0911111	0.894841	0.258483
	438315	dxs	-
	440177	\dxs	-
	440202	ispA	-
	441101	xseB \ispA	--
	441343	\xseB	-
EcoCyc (D)	441371			-	UND	0	-0.333333	0.263312	0.000653035	0.32	0.268328	0.169815	0.0266667	0.878818	0.015053	0.04	0.118978	0.000159455
	441549	thiI	+
	442997	\thiI	+
	443051	yajL	-
	443604	panE	-
	443641	\yajL	-
	444515	\panE	-
	444558			-	UND	0	-0.2	0.555198	1.4019e-10	-8.88178e-17	0.557274	0.92323	0.266667	0.136683	0.00207763	-0.0933333	0.144222	0.0164268
EcoCyc	444658			+	UND	0	-0.72	0.855663	2.68753e-13	-0.213333	1.99122	1.10055e-05	0.92	0.694486	2.65849e-08	0.0933333	0.17282	5.43438e-07
	444683	yajQ	+
	445174	\yajQ	+
	445302	yajR	-
	446666	\yajR	-
EcoCyc	446685			-	TSS	0	-0.48	0.823327	8.79565e-07	0.0933333	0.879697	0.000498346	0.533333	0.416588	8.27271e-06	-0.2	0.392869	0.000709704
	446815	cyoE	-
	447387			-	UND	0	-0.266667	0.239679	0.00995958	0.24	0.245178	0.271863	0.04	0.653197	0.0241922	0	0.692823	0.0214355
	447705	\cyoE	-
	447717	cyoD	-
	448046	cyoC \cyoD	--
	448547			-	UND	0	-0.146667	0.234379	0.868758	0.173333	0.292873	0.0334583	-0.106667	0.239679	0.954035	0.106667	0.134669	0.0956833
	448648			-	UND	0	-0.24	0.463335	0.00585956	0.146667	0.479444	0.987445	0.133333	0.144754	0.0317054	-0.0133333	0.113137	0.0177097
	448650	cyoB	-
	448660	\cyoC	-
	450641	\cyoB	-
	450663	cyoA	-
	451610	\cyoA	-
	451616			+	UND	0	0.253333	0.332892	1	-0.346667	0.414267	1	0.24	0.291245	4.47696e-10	-0.0933333	0.247785	0.000173401
	451622			-	UND	0	0.0533333	0.229783	1.25144e-05	-0.0133333	0.467247	0.0360445	0.04	0.562219	2.47082e-06	-0.226667	0.434386	0.000808019
	451632			-	PSS	0	-1.68	3.18715	1.05978e-05	0.72	3.33427	0.0543033	0.88	1.26323	0.00206209	0.106667	0.327414	0.00173529
	451650			-	TSS	0	0.0133333	0.189326	1.21736e-05	-0.173333	0.25923	0.00348762	0.32	0.242212	0.000471839	-0.306667	0.22745	0.0056843
	451651			-	TSS	0	-2.52667	3.59525	1.49488e-16	0.566667	4.31734	9.1768e-16	2.18667	1.94484	8.575e-15	-0.226667	0.927222	2.28495e-14
EcoCyc (D)	451653			-	TSS	0	-0.226667	0.283784	5.18874e-08	0.2	0.319934	1.7625e-08	-0.0533333	0.156631	0.000113761	0.106667	0.161658	2.03481e-06
	452070	ampG	-
	453545	\ampG	-
	453589	yajG	-
	454167	\yajG	-
	454423			+	TSS	0	-0.226667	0.319934	0.000786846	0.04	0.376597	0.0852016	0.186667	0.216679	0.14747	0.106667	0.286616	0.125403
	454434			+	TSS	0	-0.253333	0.517334	0.0038357	0.0533333	0.586859	1	0.226667	0.281236	1.70887e-08	-0.0533333	0.677175	1
	454472	bolA	+
	454789	\bolA	+
	454992			+	PSS	0	0.0666667	0.34254	0.000500119	-0.213333	0.477773	0.0446835	0.146667	0.387693	0.000143409	0.0666667	0.273182	2.22573e-05
EcoCyc (D)	454993			+	PSS	0	-1.38	5.35271	2.65599e-17	-2.79333	7.38172	3.98561e-16	4.61333	5.28422	1.58239e-15	-0.16	3.53557	3.79819e-15
	454994			+	PSS	0	-0.04	1.11475	9.89729e-15	-0.773333	1.55161	9.29354e-14	0.72	1.17796	9.79144e-12	0.4	0.998399	2.70155e-10
	454995			+	UND	0	0.0533333	1.49952	1.29003e-14	-0.6	1.52175	8.47708e-14	0.286667	1.27191	3.34862e-13	0.246667	0.925675	9.86965e-12
	454996			+	UND	0	0.04	0.169756	0.000159867	-0.306667	0.211661	0.197779	0.28	0.154919	0.238466	-0.04	0.12	0.411167
	455004			+	TSS	0	-0.2	0.136627	0.249301	0.2	0.161765	0.201647	0.0266667	0.137314	0.135591	-0.0666667	0.143818	0.385318
	455133	tig	+
	456431	\tig	+
	456554			+	UND	0	-0.293333	0.144223	0.990211	0.333333	0.163344	0.0235367	-0.0266667	0.134669	0.149006	0.0533333	0.146171	3.14713e-08
EcoCyc (D)	456577			+	UND	0	-0.506667	0.347179	1.90908e-05	0.386667	0.377359	0.194928	0.16	0.171315	0.00017608	0.0133333	0.163347	2.50272e-06
EcoCyc (H)	456604			+	UND	0	-0.0266667	0.132796	0.257691	0.0133333	0.128583	0.156133	0.24	0.289214	1.10045e-05	-0.213333	0.479332	9.16653e-08
	456605			+	TSS	0	-1.05333	0.952475	4.02683e-10	0.666667	1.12715	4.95187e-10	2.72	0.975749	2.71355e-15	-1.02667	3.26362	1.11414e-15
	456606			+	UND	0	-0.0933333	0.732967	0.963607	0.106667	0.119367	0.0417191	0.0533333	0.172172	0.1185	0.0933333	0.226274	2.49264e-06
	456677	clpP	+
	457120			+	PSS	0	-0.133333	0.184753	0.000695924	0.0266667	0.198572	0.235205	0.413333	0.142926	0.000165905	-0.333333	0.323319	1.49763e-05
	457121			+	UND	0	-0.0266667	0.765957	0.928635	0.04	0.113138	0.444747	0.0533333	0.14794	0.046918	0.106667	0.225112	0.000398271
	457199			+	UND	0	0.04	0.516398	1	0.16	0.128582	1	0.0533333	0.265333	1.17262e-06	-0.0133333	0.897713	4.41634e-07
	457200			+	UND	0	0.133333	0.117757	1	0.106667	0.226415	1	0.0533333	0.471955	1.20268e-11	-0.0533333	0.885137	7.63424e-13
	457201			+	TSS	0	0.68	0.177388	1	0.213333	0.638684	1	0.48	1.92699	5.97911e-16	0.133333	3.11256	3.93019e-16
EcoCyc (E)	457202			+	TSS	0	4.2	1.88877	7.1565e-17	5.61333	4.82622	1.06837e-19	2.94667	8.53965	5.0974e-20	-2.61333	26.4189	2.47265e-20
	457203			+	TSS	0	2.25333	0.866391	1.09834e-15	-0.533333	1.58987	2.04674e-17	0.373333	2.19849	4.55141e-17	2.38667	7.43917	1.23353e-17
	457204			+	UND	0	0.0533333	0.565685	0.00419252	0.306667	0.132665	6.62153e-13	-0.16	0.215466	3.19923e-13	0.933333	0.947577	7.80206e-15
	457208			+	PSS	0	0.04	0.4	1	0.173333	0.175879	1	0.0933333	0.374367	9.66178e-12	0.0933333	0.857215	1.28272e-07
	457209			+	UND	0	0.0266667	0.239577	1	0.0533333	0.895289	1	9.99201e-17	0.134717	0.000734407	0.133333	0.34564	3.61094e-06
	457235			+	TSS	0	0.133333	0.183251	3.71321e-06	-0.226667	0.152112	0.00198349	0.16	0.179369	2.93872e-05	0.173333	0.386437	6.7153e-08
	457300	\clpP	+
	457365			+	UND	0	0.08	0.326599	0.00158372	-0.0533333	0.113142	0.0573676	0.133333	0.386439	0.0432635	-0.333333	0.522473	0.0932157
	457405			+	UND	0	0.0266667	0.239577	1	0.146667	0.134662	1	-0.16	0.358353	2.39795e-07	-0.08	0.384295	0.0017273
	457416			+	PSS	0	0	0.4	0.0297869	0.133333	0.156631	0.0327623	0.12	0.346412	0.000164779	-0.413333	0.451368	0.000635047
	457417			+	PSS	0	0	0.565685	0.255776	0.16	0.8	0.000274666	-0.0933333	0.122261	0.000294117	0.44	0.178896	3.31693e-05
	457426	clpX	+
	457579			+	UND	0	-0.08	0.124366	0.419589	0.426667	0.34254	6.90492e-07	-0.52	0.48	1.71253e-05	0.653333	0.464758	1.74821e-11
	457904			+	UND	0	0.0666667	0.711927	1	0.0533333	0.131618	1	-0.106667	0.183729	2.24628e-07	0.0666667	0.327654	3.96699e-06
	457906			+	UND	0	0.226667	0.398923	4.78249e-06	-0.293333	0.471876	3.81435e-06	0.32	0.352381	6.60395e-12	0.0666667	0.76439	2.91232e-12
	457907			+	UND	0	0.04	0.132796	0.134619	0.0133333	0.163299	1.24008e-05	0.0266667	0.168127	8.92665e-06	0.133333	0.452982	3.51761e-10
	457909			+	UND	0	0.373333	0.266333	1.51066e-12	0.08	0.469326	1.00186e-14	-0.28	0.657513	2.75993e-14	0.733333	1.18122	3.21422e-15
	458302			+	PSS	0	-0.0266667	0.42834	0.000308219	0.08	0.575561	0.00027825	0.44	0.688198	1.91648e-07	-0.866667	0.864997	0.000140142
	458312			+	UND	0	0.0133333	0.516398	0.812633	0.0133333	0.115475	0.520491	0.2	0.265591	2.7193e-06	-0.306667	0.391237	0.130723
	458363			+	TSS	0	-0.0133333	0.115475	0.817562	0.173333	0.274227	0.000386041	-0.0666667	0.434512	0.000440369	-0.16	0.449593	8.84513e-08
	458364			+	TSS	0	0.08	0.238886	1.05318e-07	0.0266667	0.347946	2.38163e-07	0.253333	0.379448	9.63806e-08	-0.52	0.48277	5.51034e-09
	458369			+	PSS	0	0.0266667	0.711927	0.13931	0.0533333	0.188299	4.27747e-05	0.0133333	0.243642	0.00036592	-0.0666667	0.378726	0.000790391
	458370			+	UND	0	0.0266667	0.653197	0.23805	1.60982e-16	0.117757	0.0040055	0.0266667	0.154919	0.00294084	0.0666667	0.286346	0.00177044
	458373			+	TSS	0	0.12	0.354659	3.79958e-05	-0.0933333	0.462367	6.39873e-06	0.173333	0.446617	1.85121e-09	-0.0666667	0.474112	2.70404e-12
	458387			+	UND	0	0.0666667	0.653197	1	0.0533333	0.142361	1	-3.9968e-16	0.211661	7.23115e-11	-0.333333	0.244915	0.0129839
	458700	\clpX	+
	458768			+	PSS	0	0	0.326599	0.88285	0.186667	0.894427	0.000102832	-0.226667	0.134664	0.001368	0.2	0.42128	0.000874919
	458811			+	UND	0	-0.333333	0.324975	6.04609e-05	0.213333	0.353283	0.368607	0.426667	0.297546	1.64219e-10	-4.88498e-16	0.691665	1.33754e-09
	458812			+	UND	0	-0.0666667	0.113138	0.0153005	0.0533333	0.144754	0.870177	0.133333	0.166534	1.14989e-05	0.04	0.471666	3.65945e-05
	458813			+	TSS	0	-3.8	3.71349	2.2709e-15	2.2	3.99587	2.94237e-11	5.38667	2.11196	7.29028e-17	-1.73333	6.18394	1.92337e-16
EcoCyc (D, H)	458815			+	UND	0	-0.226667	0.359639	0.0105546	0.2	0.38748	0.113866	-0.0266667	0.174356	0.987472	0.12	0.154919	0.0294458
	458817			+	PSS	0	0.0266667	0.326599	0.0180682	0.133333	0.219418	0.000662952	-0.213333	0.344839	0.00263649	0.146667	0.352522	3.05028e-05
	458818			+	PSS	0	0.0266667	0.166446	0.00513013	0.333333	0.377722	0.000146317	-0.28	0.524691	6.45628e-05	0.253333	0.748911	7.30368e-07
	458888	lon	+
	461242	\lon	+
EcoCyc (D)	461332			+	TSS	0	-1.52	0.785875	2.01232e-11	1.04	0.824621	0.92323	0.48	0.256125	0.160803	0.146667	0.178885	0.00197617
	461391			+	TSS	0	-0.36	0.515891	6.48094e-05	0.226667	0.529161	1	0.133333	0.117757	1.48481e-12	0.08	0.516398	1
EcoCyc (D)	461395			+	TSS	0	-2.42667	6.2244	7.18021e-16	-1.29333	6.23142	9.44392e-15	4.65333	1.18526	1.69233e-14	-2.09333	1.62714	1.49068e-08
	461413			+	UND	0	-0.08	0.366525	3.90296e-05	-0.04	0.468136	0.00643867	0.106667	0.317442	0.0138912	0.0133333	0.158329	0.274898
	461430			+	UND	0	-0.2	0.316749	1.52022e-08	0.106667	0.373736	0.0757197	0.0266667	0.261982	0.000391683	0.08	0.186195	0.013786
	461431			+	PSS	0	-0.08	0.292873	1.76691e-09	-0.226667	0.367333	6.30105e-06	0.28	0.285657	0.00193993	0.213333	0.373242	1.62816e-06
	461432			+	TSS	0	-0.546667	0.573178	1.24427e-05	0.44	0.72673	2.40262e-08	0.0133333	0.477915	2.23309e-05	0.333333	0.343516	3.38114e-11
	461433			+	UND	0	-0.0133333	0.223284	0.000661415	-0.08	0.266892	0.00017825	0.0933333	0.155423	0.0115051	0.0666667	0.142361	0.0020194
	461451	hupB	+
	461544			+	UND	0	0.146667	0.156631	1.29529e-05	-0.333333	0.217869	1	0.386667	0.252645	4.31575e-14	-0.24	0.312412	1
	461723	\hupB	+
	461852			+	TSS	0	-0.12	0.286589	3.66322e-07	0.0133333	0.315858	0.00163448	0.08	0.158374	0.0103872	0.08	0.124427	0.000122821
	461915	ppiD	+
	463786	\ppiD	+	+	UND	0	0.12	0.265591	0.0021273	-0.226667	0.355477	0.847416	0.16	0.26549	0.00144994	-0.04	0.265635	0.0897556
	463937	ybaV	+
	464308	\ybaV	+
	464402	fadM	+
	464800	\fadM	+
	464852	queC	-
	465547	\queC	-
	465612	ybaE	-
	467312	\ybaE	-
	467412	cof	+
	468136			+	PSS	0	-0.08	0.44	4.41559e-07	-0.2	0.514328	3.63283e-06	0.586667	0.453725	6.62345e-07	-0.106667	0.672515	8.4191e-12
	468138			+	PSS	0	-0.0666667	0.426578	4.15617e-09	-0.0933333	0.441175	2.69977e-06	0.2	0.249819	0.000601807	0.68	0.387262	2.64818e-07
	468230	\cof	+
	468383	ybaO	+
	468841	\ybaO	+
	468871	mdlA	+
	470636	mdlB	+
	470643	\mdlA	+
	472417	\mdlB	+
	472598	glnK	+
	472936	\glnK	+
	472966	amtB	+
	474252	\amtB	+
	474301	tesB	-
	475161	\tesB	-
EcoCyc	475199			-	TSS	0	-0.373333	0.277642	9.79992e-06	0.306667	0.356128	0.00203833	0.12	0.315498	2.82572e-05	-0.12	0.28595	0.00476219
	475379	ybaY	+
	475951	\ybaY	+
	475982	ybaZ	-
	476371	\ybaZ	-
	476446			+	UND	0	-0.0933333	0.291244	7.45695e-09	0.04	0.334698	4.36373e-05	1.44329e-16	0.211661	0.157072	0.08	0.194388	0.0143774
	476447			+	UND	0	-0.28	0.722957	2.62058e-12	0.04	0.873248	1.85161e-11	0.373333	0.747645	2.46543e-07	0.0133333	0.883887	2.31602e-12
	476448	ffs	+	+	TSS	0	-9.26	24.8598	1.31654e-19	6.87333	29.254	1.94612e-19	3.61333	23.6929	6.14186e-19	-8.46667	21.7688	1.10088e-17
	476449			+	UND	0	0.0266667	0.565685	2.4906e-05	0.0266667	0.175879	1.4736e-05	-0.146667	0.238886	0.000332173	0.12	0.213292	0.0027887
	476450			+	TSS	0	0.0466667	1.39852	6.03412e-11	-0.853333	1.83995	8.14435e-09	1.12667	1.38934	2.26919e-12	0.16	1.86768	4.1724e-11
	476451			+	PSS	0	-0.146667	0.246577	0.00551222	0.266667	0.272275	5.06936e-06	-0.133333	0.183775	0.0010015	0.08	0.233359	7.77645e-06
	476452			+	UND	0	-0.0133333	0.174356	0.159733	-0.0133333	0.219892	0.207332	0.0933333	0.161658	0.00330591	-0.0666667	0.164925	0.000319697
	476453			+	PSS	0	-0.24	0.623538	1.73775e-06	0.226667	0.715542	6.51555e-05	0.0933333	0.387126	5.22278e-07	0.106667	0.67843	1.91011e-06
	476454			+	PSS	0	-0.226667	2.47645	5.05924e-08	-0.266667	2.84468	2.63658e-10	1.02667	1.64972	6.68982e-06	0.266667	3.1818	1.15249e-09
	476456			+	UND	0	0.0533333	0.193384	0.0730234	-0.106667	0.26379	0.000140164	0.133333	0.191833	2.62053e-07	-0.04	0.115475	2.73207e-09
	476457			+	UND	0	-0.12	0.11755	0.000165506	0.0533333	0.124366	0.971319	0.146667	0.952227	3.01611e-05	-0.0533333	0.13267	0.00492347
	476471			+	PSS	0	0.0933333	0.291244	9.54815e-09	-0.373333	0.428228	0.115952	0.386667	0.482653	4.02933e-05	-0.133333	0.352156	1.58592e-05
	476472			+	UND	0	0.173333	0.272274	2.14206e-06	-0.4	0.3674	0.368608	0.306667	0.259563	0.000172805	-0.0933333	0.152437	4.1018e-06
	476473			+	UND	0	2	2.39956	2.3538e-13	-3.98667	3.42536	1.65069e-08	2.02667	2.46659	6.73713e-08	0.08	0.428349	4.75817e-11
	476517			+	UND	0	0.133333	0.128583	6.0537e-08	-0.106667	0.213971	4.59751e-08	-0.106667	0.288162	0.000114344	0.293333	0.489898	7.02134e-10
	476518			+	PSS	0	0.213333	0.248387	3.21991e-12	-0.973333	2.47846	3.9447e-13	2.53333	3.84274	1.34557e-13	-2.09333	4.43357	2.60786e-11
	476519			+	UND	0	0	0.187899	3.37317e-07	-0.0533333	0.238318	0.000931948	0.0933333	0.219445	7.48817e-07	-0.12	0.218229	0.000435381
	476521			+	UND	0	-0.04	0.142374	1.67935e-06	-0.0666667	0.158333	0.974706	0.12	0.825178	0.0833596	0.146667	0.144223	5.6177e-07
	476522			+	UND	0	0.0266667	0.223948	4.32159e-05	-0.106667	0.294845	0.0726358	0.04	0.228619	0.881734	0.28	0.281898	1.05938e-06
	476527			+	UND	0	-0.0666667	0.115475	0.882315	0.173333	0.164925	3.32462e-06	-0.133333	0.186622	6.00998e-05	0.0666667	0.294923	2.42395e-05
	476528			+	UND	0	0.12	0.175879	0.00218839	-0.133333	0.292119	0.000901033	0.0133333	0.282843	3.0051e-05	-0.04	0.187617	0.000155927
	476561	\ffs	+
	476672	ybaA	+
	477025	\ybaA	+
	477067	ylaB	-
	478617	\ylaB	-
	478781	ylaC	-
	479251	\ylaC	-
	479286			-	PSS	0	-0.106667	0.595987	6.61882e-10	-0.08	0.676676	2.15025e-09	0.32	0.597327	2.33653e-06	-0.0533333	0.728126	6.32458e-12
	479367	maa	-
	479918	\maa	-
	479942			-	TSS	0	-0.64	0.732967	4.93624e-05	0.52	0.737564	1	0.153333	0.118322	8.10849e-13	0.106667	0.162532	1
	480090	hha	-
	480308	\hha	-
	480334	tomB	-
	480421			-	TSS	0	-0.44	0.586629	5.18626e-12	0.0266667	0.652891	0.0868912	0.48	0.324962	2.5901e-05	0.106667	0.27878	3.58288e-10
	480708	\tomB	-
EcoCyc (D)	480793			-	UND	0	-0.2	0.533112	0.00157915	0.0933333	0.533612	1	0.146667	0.461886	2.1288e-09	0.04	0.154919	1
	481254	acrB	-
	484350			-	PSS	0	0.0666667	0.233239	3.93883e-09	-0.293333	0.282843	0.000103257	0.286667	0.199627	5.37136e-07	-0.04	0.195286	1.45728e-06
	484352			-	UND	0	-0.0666667	0.979796	3.00487e-05	0.0266667	0.136983	0.10829	-0.0266667	0.126419	0.981424	0.08	0.979796	0.287434
	484403	\acrB	-
	484426	acrA	-
	485619	\acrA	-
EcoCyc (D)	485697			-	UND	0	-0.146667	0.254352	0.000502942	-0.0266667	0.285612	0.904558	0.226667	0.158326	0.0491423	-0.106667	0.136411	0.965361
	485761	acrR	+
	486408	\acrR	+
	486536	mscK	+
	489898	\mscK	+
	490110	ybaM	-
	490271	\ybaM	-
	490285	priC	-
	490812	\priC	-
	490882	ybaN	+
	491259	\ybaN	+
	491412	apt	+
	491963	\apt	+
	492055			+	UND	0	-0.16	0.451851	0.000467997	-1.77636e-16	0.526532	0.00122076	0.253333	0.311555	2.19682e-09	-0.08	0.258652	1.35837e-05
EcoCyc	492056			+	UND	0	-0.04	0.172998	7.12036e-07	0.04	0.237897	0.00117143	-0.0533333	0.2216	0.000212799	0.0666667	0.169756	0.00585418
	492092	dnaX	+
EcoCyc (E)	493708			+	UND	0	0.08	0.132796	1	0.586667	0.513893	1	0.0133333	0.82813	1.04905e-14	-0.813333	1.55197	1.43761e-13
	493909			+	PSS	0	0.0666667	0.25923	2.52165e-06	-0.16	0.293939	1.46697e-05	0.0666667	0.178886	6.15706e-05	0.0266667	0.158325	0.0038751
	494023	\dnaX	+
	494051			+	PSS	0	-0.173333	0.398923	0.00154666	0.386667	0.485245	4.087e-07	-0.04	0.664129	2.00015e-06	-0.413333	0.887845	0.00307762
	494052			+	UND	0	-0.08	0.187766	7.09601e-05	0.2	0.266439	8.73166e-06	-0.16	0.347212	0.0552083	0.0266667	0.387166	0.002437
	494076	ybaB	+
	494405	recR \ybaB	++
	495010	\recR	+
EcoCyc (H)	495076			+	TSS	0	-1.28	2.24844	1.41394e-14	0.293333	2.32346	1.12259e-08	3.48	1.97658	8.22841e-16	-0.973333	2.91578	3.00199e-16
	495082			+	PSS	0	-0.4	0.529153	0.000223757	0.24	0.536656	0.00542672	0.48	0.262298	0.000183144	0.16	0.613319	3.55946e-05
EcoCyc (H)	495083			+	PSS	0	-0.84	0.76385	0.000222372	0.666667	0.777789	0.0859153	0.893333	0.544692	4.11525e-05	-0.226667	1.266	1.98121e-05
	495084			+	PSS	0	-0.36	0.385559	0.0232899	0.133333	0.495312	0.176266	0.653333	0.341964	1.01269e-06	0.12	0.917388	2.739e-05
	495090			+	PSS	0	-0.146667	0.291252	1.9296e-08	-0.0533333	0.334752	0.00358341	0.413333	0.186231	0.000194686	0.493333	0.842228	3.82755e-07
	495091			+	PSS	0	-0.226667	0.198664	0.00378069	0.146667	0.227451	0.0207686	0.28	0.184753	0.000494717	0.28	0.381125	4.95373e-07
	495120	htpG	+
	496544			+	TSS	0	0.0266667	0.122239	0.0809155	-0.08	0.169732	0.127243	0.253333	0.166533	0.000268741	-0.306667	0.237355	0.00299521
	496994	\htpG	+
	497133			+	TSS	0	-0.213333	0.513332	1.39477e-05	0.04	0.548483	0.0896116	0.2	0.2216	0.00669078	-0.0533333	0.153189	0.00715971
	497175	adk	+
	497819	\adk	+
	498055	hemH	+
	499014	aes	-
	499017	\hemH	+
	499973	\aes	-
	500125	gsk	+
	501429	\gsk	+
	501562	ybaL	-
	503238	\ybaL	-
	503476	fsr	-
	504696	\fsr	-
	504914	ushA	+
	506566	\ushA	+
	506603	ybaK	-
	507082	\ybaK	-
EcoCyc (D)	507204	chiX	+	+	UND	0	-1.05333	1.45327	3.21711e-13	1.34667	1.73374	1.58868e-10	-0.24	1.61784	5.59114e-10	0.08	1.71645	1.65335e-13
	507286	ybaP	-
	507287	\chiX	+
	508080	\ybaP	-
	508218	ybaQ	+
	508559	\ybaQ	+
	508875	copA	-
	511379	\copA	-
EcoCyc (D)	511409			-	TSS	0	-0.16	0.259989	0.0409565	0.0133333	0.324747	0.133612	0.173333	0.211661	0.000321858	-0.0666667	0.158352	0.308828
	511641	glsA	+
	512573	\glsA	+
	512576	ybaT	+
	513868	\ybaT	+
	513993	cueR	+
	514400	\cueR	+
	514401	ybbJ	-
	514856	qmcA	-
	514859	\ybbJ	-
	515773	\qmcA	-
EcoCyc (D)	515892			+	TSS	0	-0.346667	0.543889	1.22515e-05	0.133333	0.557143	0.282046	0.253333	0.238886	0.0068479	-0.0133333	0.732967	0.00584911
	515919	fetA	+
	516583	fetB	+
	516596	\fetA	+
	517362	\fetB	+
	517425	ybbN	-
	518279	\ybbN	-
	518301			-	TSS	0	-0.0133333	0.142374	0.120475	-0.0266667	0.166587	0.0123852	0.146667	0.988679	1.96149e-05	1.77636e-16	0.2278	0.0011525
	518340	ybbO	-
	519139	tesA	-
	519149	\ybbO	-
	519733	ybbA	+
	519765	\tesA	-
	520416	ybbP	+
	520419	\ybbA	+
	522830	\ybbP	+
	523261	rhsD	+
	527541	\rhsD	+
	527581	ybbC	+
	527949	\ybbC	+
	527952	rhsH	+
	528640	ybbD	+
	528659	\rhsH	+
	529130	\ybbD	+
	529232			-	UND	0	-0.533333	0.469894	8.67863e-10	0.24	0.567988	0.000398586	0.64	0.458446	5.77799e-10	-0.266667	0.661715	3.98933e-11
	529500	ylbI	+
	529592	\ylbI	+
	529595	ylbG	-
	530016	\ylbG	-
	530132	mnmH (selU)	-
	530168			-	UND	0	0.04	0.692823	1	0.0133333	0.189327	1	0.106667	0.246712	0.000153495	-0.106667	0.237897	0.000239402
	531226	\mnmH (selU)	-
	531295	allS	-
	532221	\allS	-
	532451	allA	+
	532933	\allA	+
	532965			+	UND	0	-0.12	0.174356	4.36532e-05	0.04	0.27847	0.114526	0.0266667	0.122853	0.999703	0.106667	0.857284	8.72028e-05
	532983			+	TSS	0	-0.12	0.194389	6.65858e-09	-0.0933333	0.22862	1.11045e-05	0.173333	0.136626	0.00434551	0.0133333	0.56569	0.0207035
	533011	allR	+
	533826	\allR	+
	533916	gcl	+
	535697	\gcl	+
	535710	hyi	+
	536486	\hyi	+
	536586	glxR	+
	537464	\glxR	+
	537633	ybbW	+
	539087	\ybbW	+
	539147	allB	+
	540508	\allB	+
	540565	ybbY	+
	541866	\ybbY	+
	541888	glxK	+
	543033	\glxK	+
	543261	allE	-
	544046	\allE	-
	544057	allC	-
	545292	\allC	-
	545314	allD	-
	546363	\allD	-
	546680	fdrA	+
	548347	\fdrA	+
	548357	ylbE	+
	549616	\ylbE	+
	549627	ylbF	+
	550439	ybcF	+
	550442	\ylbF	+
	551332	\ybcF	+
	551527	purK	-
	552591	purE	-
	552594	\purK	-
	553100	\purE	-
	553218	lpxH	-
	553940	\lpxH	-
	553943	ppiB	-
	554437	\ppiB	-
	554487			-	TSS	0	-0.12	0.316749	0.109174	0.0666667	0.348987	0.131708	0.0266667	0.167195	0.949125	0.106667	0.138565	0.00195415
	554488			-	TSS	0	-2	3.2699	2.47948e-15	-0.12	3.84658	6.72067e-14	2.34667	2.44696	7.93362e-14	0.493333	0.84538	1.00416e-14
	554489			-	TSS	0	0.133333	0.493153	1.04597e-08	-0.426667	0.765488	0.000461592	0.226667	0.557136	4.69062e-05	0.0266667	0.285658	0.0124911
	554490			-	UND	0	-0.293333	1.33147	2.01534e-11	-0.546667	1.78663	3.4564e-13	1.12	1.27459	7.15443e-14	0.24	0.989629	4.10247e-14
	554556			-	UND	0	-0.08	0.147874	6.28608e-05	0.0133333	0.18619	0.162443	0.0533333	0.133628	0.280356	0.0266667	0.156369	0.0294526
EcoCyc	554577			+	UND	0	-0.0133333	0.366525	3.1773e-09	-0.253333	0.478285	0.010673	0.36	0.194389	4.53897e-09	-0.0933333	0.161659	6.90918e-05
	554611	cysS	+
	555996	\cysS	+
	556032	ybcI	-
	556553	\ybcI	-
	556661	ybcJ	-
	556873	\ybcJ	-
	556875	folD	-
	557741	\folD	-
EcoCyc	557779			-	UND	0	-0.173333	0.849845	2.43581e-13	-0.373333	0.919875	0.00191491	0.693333	0.344972	7.22312e-08	-0.0933333	0.278889	1.11627e-07
	558212	sfmA	+
	558754	\sfmA	+
	558974	sfmC	+
	559666	\sfmC	+
	559697	sfmD	+
	562300	\sfmD	+
	562336	sfmH	+
	563319	\sfmH	+
	563326			+	TSS	0	0.106667	0.264323	0.000929661	-0.213333	0.396653	0.00055248	0.146667	0.351758	1.90775e-05	-0.133333	0.235515	0.00265389
	563330	sfmF	+
	563845	\sfmF	+
	563848	sfmZ	-
	564480	\sfmZ	-
	564815	intD	-
	565858	xisD	-
	565978	\intD	-
	566079	\xisD	-
	566098	exoD	-
	566376	peaD \exoD	+-
	566684	renD	+
	566687	\peaD	+
	566842	insE1	+
	567138	insF1	+
	567141	\insE1	+
	568004	\insF1	+
	568247	\renD	+
	568315	emrE	+
	568647	\emrE	+
	568902	ybcK	+
	570428	\ybcK	+
	570893	ybcL	+
	571444	\ybcL	+
	571454	ybcM	+
	572251	\ybcM	+
	572368	ylcH	+
	572466	ybcN	+
	572469	\ylcH	+
	572921	ninE \ybcN	++
	573084	ybcO	+
	573091	\ninE	+
	573371	rusA	+
	573374	\ybcO	+
	573730	ylcG	+
	573733	\rusA	+
	573870	\ylcG	+
	573956	quuD	+
	574339	\quuD	+
	574529	nmpC	-
	574737	insH1	-
	575753	\insH1	-
	576825	\nmpC	-
EcoCyc	576868			-	UND	0	-0.586667	0.5366	0.0143329	0.533333	0.532816	0.999998	0.0533333	0.478835	4.09132e-07	0	0	1
	577398	essD	+
	577613	rrrD \essD	++
	578107	rzpD	+
	578110	\rrrD	+
	578327	rzoD	+
	578509	\rzoD	+
	578568	\rzpD	+
	578600	borD	-
	578893	\borD	-
	578918			-	TSS	0	0.12	0.246577	7.96411e-11	-0.373333	0.371949	1.2149e-07	0.4	0.339318	4.30589e-08	-0.0266667	0.269543	1.21503e-11
EcoCyc	578919			-	TSS	0	0.16	0.385559	1.92356e-11	-0.546667	0.525139	4.66556e-05	0.466667	0.381754	1.37702e-07	0.12	0.276164	7.17982e-09
	579184	ybcV	-
	579594	\ybcV	-
	579880	ybcW	+
	580086	\ybcW	+
	580251	ylcI	-
	580445	\ylcI	-
	580834	nohD	+
	581354	aaaD	+
	581379	\nohD	+
	581660	tfaD	+
	581662	\aaaD	+
	582097	\tfaD	+
	582152	ybcY	-
	582806	\ybcY	-
	582953	tfaX	+
	583135	\tfaX	+
	583681	appY	+
	584430	\appY	+
	584680	ompT	-
	585573			-	PSS	0	-0.28	0.833946	3.65467e-06	0.106667	0.914768	0.0475698	0.0533333	0.459565	0.00927434	0.186667	0.281898	0.0016116
	585633	\ompT	-
	585661			-	UND	0	-0.16	0.163299	0.182459	0.2	0.193218	0.0024595	-0.08	0.151438	0.253419	0.0533333	0.151438	0.262854
	585662			-	TSS	0	-1.02667	2.55938	3.34711e-16	-0.6	3.15674	4.08504e-15	1.16	1.78333	2.14381e-13	0.466667	0.465454	3.40118e-13
	585663			-	TSS	0	0.186667	0.538643	6.85475e-13	-0.853333	0.753355	3.16005e-07	0.813333	0.562798	1.71322e-10	0.16	0.34718	8.81841e-12
EcoCyc	585664			-	UND	0	-0.16	0.144754	0.000319134	0.133333	0.166994	0.155149	0.12	0.153189	6.85762e-07	0.0666667	0.234379	7.96052e-09
	586147	envY	-
	586908	\envY	-
	587091	ybcH	-
	587981	\ybcH	-
	587982	nfrA	-
	590941	nfrB	-
	590954	\nfrA	-
	593178	\nfrB	-
	593328	cusS	-
	594760	cusR	-
	594770	\cusS	-
	595443	\cusR	-
	595600	cusC	+
	596973	\cusC	+
	597131	cusF	+
	597463	\cusF	+
	597479	cusB	+
	598702	\cusB	+
	598714	cusA	+
	601857	\cusA	+
	601959	pheP	+
	603335	\pheP	+
	603416	ybdG	-
	604663	\ybdG	-
	604771	nfsB	-
	605424	\nfsB	-
	605443			-	UND	0	-0.106667	0.373892	7.75161e-08	-0.16	0.527189	0.165442	0.306667	0.394636	0.0789266	-0.08	0.198662	0.902025
EcoCyc	605451			-	TSS	0	-0.133333	0.337836	1.74533e-10	0.0266667	0.498455	1.79071e-06	-0.0266667	0.438862	5.79201e-05	0.12	0.194784	0.00488369
	605518	ybdF	-
	605886	\ybdF	-
	605910			-	TSS	0	-0.813333	0.792633	1.70912e-07	0.72	0.816649	0.857523	0.0533333	0.153295	0.723472	0.146667	0.137644	6.22089e-07
	605951	ybdJ	-
	606199	\ybdJ	-
	606265	ybdK	-
	607383	\ybdK	-
	607734	sokE	+
	607790			-	TSS	0	-0.426667	0.629926	1.01765e-06	-0.0266667	0.852427	0.000228663	0.493333	0.62582	0.000319122	-0.173333	0.392761	0.00205337
	607792	\sokE	+
	607836	hokE	+
	607988	\hokE	+
	608065	insL1	+
	609177	\insL1	+
	609459	entD	-
	610079	\entD	-
	610254	fepA	-
	612494	\fepA	-
	612737	fes	+
	613939	\fes	+
	613942	ybdZ	+
	614157	entF	+
	614160	\ybdZ	+
	618038	\entF	+
	618254	fepE	+
	619384	fepC	-
	619387	\fepE	+
	620196	fepG	-
	620199	\fepC	-
	621185	fepD	-
	621188	\fepG	-
	622189	\fepD	-
	622300	entS	+
	623550	\entS	+
	623554	fepB	-
	624510	\fepB	-
	624885	entC	+
	626060	\entC	+
	626070	entE	+
	627680	\entE	+
	627694	entB	+
	628551	entA \entB	++
	629297	\entA	+
	629300	entH	+
	629713	\entH	+
EcoCyc	629858			+	TSS	0	-0.306667	0.154919	0.979007	0.306667	0.158325	0.340172	0.0133333	0.516398	0.163147	0.266667	0.187617	2.32869e-06
	629894	cstA	+
	631999	\cstA	+
	632182	ybdD	+
	632379	\ybdD	+
	632389	ybdH	-
	633477	\ybdH	-
	633586	ybdL	+
	634746	\ybdL	+
	634747	ybdM	-
	635349	ybdN	-
	635376	\ybdM	-
	636569	\ybdN	-
	636716	ybdO	-
	637618	\ybdO	-
	637827	dsbG	-
	638573	\dsbG	-
	638629			+	TSS	0	-0.346667	0.194594	0.000367703	0.293333	0.213289	0.979909	0.106667	0.128582	0.472245	0.0533333	0.294845	0.37233
EcoCyc (D)	638693			+	UND	0	0	0.163299	4.21923e-09	-0.12	0.291252	0.116965	0.413333	0.328753	2.8233e-06	-0.613333	0.382275	0.411328
	638762			+	PSS	0	-0.0933333	0.153188	2.34333e-08	0.0266667	0.228295	0.000453377	-1.11022e-17	0.243642	0.000136389	0.0533333	0.211661	0.00734957
	638763			+	PSS	0	0.0533333	0.783496	1.01434e-10	-0.52	1.32796	1.29746e-06	0.306667	0.753357	1.91105e-09	0.2	0.515573	3.2778e-05
	638831			+	TSS	0	0.12	0.228794	4.18517e-12	-0.346667	0.328347	2.08711e-08	0.493333	0.384527	4.87865e-12	-0.32	0.477919	6.99824e-09
	638835			+	UND	0	0.0533333	0.254352	1.30755e-05	-0.173333	0.345873	2.4997e-05	0.106667	0.272275	0.000153871	-0.08	0.168225	0.98275
	638881			+	TSS	0	-1.37333	1.65626	3.96333e-14	0.773333	1.74349	1.55024e-12	0.493333	0.646666	9.42253e-11	0.306667	0.478888	2.56149e-12
	638907			+	PSS	0	-0.0933333	0.226276	5.14567e-05	0.0133333	0.268616	0.00463366	0.0933333	0.165389	0.00585867	-0.0666667	0.115475	0.956289
	638918			+	TSS	0	0.44	0.338625	2.04987e-13	-0.933333	0.47696	3.81898e-08	0.386667	0.367434	0.000150155	0.08	0.153195	0.000581514
	638919			+	UND	0	0.4	0.229783	1.49392e-12	-0.693333	0.335489	4.45316e-08	0.186667	0.279839	0.185399	0.12	0.181872	0.00610034
	638920			+	UND	0	0.16	0.122239	1.84591e-10	-0.226667	0.265872	9.41749e-06	-0.0666667	0.214169	0.0330012	0.146667	0.144816	0.0012846
EcoCyc (D)	638921			+	TSS	0	10.72	6.65945	3.74677e-19	-20.9333	9.45757	3.51741e-17	7.82667	6.77145	4.69669e-14	2.06667	0.975513	1.32346e-11
	638922			+	PSS	0	1.04	0.717774	1.08358e-14	-1.46667	1.34692	4.54725e-11	-0.0533333	0.797532	1.21169e-06	0.213333	0.344564	0.00492352
	638923			+	TSS	0	0.133333	0.354659	2.45184e-05	-0.133333	0.426985	1.22812e-05	0.0266667	0.322214	1.49943e-07	-0.0266667	0.273974	2.53864e-05
	638926			+	UND	0	0.0533333	0.175879	1.88049e-09	-0.0266667	0.266333	2.04286e-07	-0.16	0.28	0.0162724	0.0933333	0.239679	0.991696
	638927			+	UND	0	0.28	0.113138	1	-0.333333	0.213289	1	-0.0666667	0.226274	0.00360514	0.0133333	0.178886	1
	638945	ahpC	+
EcoCyc (E)	639002			+	UND	0	0.04	0.692823	1	0.08	0.15492	1	-0.0933333	0.223951	1.76394e-05	0.0666667	0.461882	0.00294599
	639429			+	UND	0	0.253333	0.352515	0.0185379	-0.56	0.535941	0.856545	0.346667	0.392947	0.0776712	-0.12	0.252647	0.989645
	639445			+	UND	0	0.0933333	0.485748	0.00371018	-0.253333	0.615969	0.0813215	0.146667	0.419973	0.184855	0.0133333	0.213333	0.211664
	639508	\ahpC	+
	639724			+	UND	0	0.6	0.855123	5.7086e-14	-1.45333	1.16482	5.19717e-06	0.786667	0.858147	4.13232e-05	0.0133333	0.35387	0.131344
	639731			+	PSS	0	0.653333	0.532463	2.11956e-10	-1.50667	0.733748	0.0112194	0.853333	0.511363	0.227195	0.0133333	0.923764	0.0156011
	639732			+	PSS	0	1.54667	1.88227	2.09537e-08	-3.37333	2.65591	0.00278529	1.82667	1.87618	0.00868442	0.0666667	0.155535	0.0016183
	639733			+	UND	0	0.28	0.542586	0.000221617	-0.72	0.753658	1	0.453333	0.523577	2.36775e-11	0.0666667	0.461546	1
	639753	ahpF	+
	641318	\ahpF	+
	641439	uspG	-
	641867	\uspG	-
EcoCyc	641901			-	UND	0	-0.306667	0.476952	4.17529e-09	0.0133333	0.484732	0.263032	0.28	0.988679	0.337522	0.12	0.126628	0.00314558
	642088	ybdR	+
	643326	\ybdR	+
	643557	rnk	-
	643967	\rnk	-
	644197	rna	-
	645003	\rna	-
EcoCyc	645032			-	TSS	0	-0.173333	0.245493	2.20701e-05	0.04	0.264324	0.964627	0.16	0.113138	0.0708878	0.12	0.257379	0.00422096
	645117	citT	-
	646580	\citT	-
	646631	citG	-
	647484	citX	-
	647509	\citG	-
	648035	\citX	-
	648039	citF	-
	649571	\citF	-
	649582	citE	-
	650487	citD	-
	650490	\citE	-
	650783	\citD	-
	650798	citC	-
	651856	\citC	-
	652235	citA	+
	653862	citB	+
	653893	\citA	+
	654542	\citB	+
	654583	dcuC	-
	655968	\dcuC	-
	656557	pagP	+
	657117	\pagP	+
	657216			+	UND	0	0.133333	0.349476	1.22672e-05	-0.426667	0.469326	1	0.36	0.321232	3.93399e-14	-0.0266667	0.271791	1
EcoCyc (D)	657249			+	TSS	0	-0.48	0.963894	0.00093906	0.32	0.984121	0.00348903	0.533333	0.688117	0.00162694	0.12	1.24172	2.57222e-06
	657267			+	UND	0	-0.16	0.258652	0.00193909	0.04	0.278887	0.282002	0.12	0.126491	0.387917	7.99361e-17	0.692823	0.930424
	657292	cspE	+
	657301			+	UND	0	-0.626667	0.638749	3.95052e-05	0.533333	0.643325	0.987549	0.106667	0.923773	0.272547	0.0133333	0.115475	0.597009
	657332			+	UND	0	-0.0266667	0.16	0.00100375	-0.0533333	0.198662	0.176767	0.0133333	0.144222	0.999082	0.16	0.894427	0.000297146
	657375			+	UND	0	-0.26	0.517959	5.76432e-07	0.14	0.528156	0.0114993	0.186667	0.138564	0.077431	-0.133333	0.136411	0.0326565
	657501	\cspE	+
	657555	flc	-
	657938	\flc	-
	658031	ybeM	+
	658818	\ybeM	+
	658947	tatE	+
	659150	\tatE	+
	659251	lipA	-
	659678			+	TSS	0	0.12	0.144223	1	-0.146667	0.256448	1	0.533333	0.338855	4.77787e-09	-0.333333	0.454313	1.07112e-07
	660216	\lipA	-
EcoCyc	660299			-	TSS	0	-1.06581e-16	0.336623	0.000301454	-0.146667	0.391963	0.119241	0.08	0.243316	0.339888	0.0666667	0.151446	0.941058
	660425	ybeF	-
	661378	\ybeF	-
	661637	lipB	-
	662278	\lipB	-
	662379	ybeD	-
	662642	\ybeD	-
	662752	dacA	-
	663963	\dacA	-
	664102	rlpA	-
	665190	\rlpA	-
	665201	mrdB	-
	666313	\mrdB	-
	666316	mrdA	-
	668217	\mrdA	-
	668248	rlmH	-
	668715	\rlmH	-
	668719	rsfS	-
	669036	\rsfS	-
	669296	cobC	-
	669907	\cobC	-
	669931	nadD	-
	670572	\nadD	-
	670574	holA	-
	671605	lptE \holA	--
	672186	\lptE	-
	672201	leuS	-
	674783	\leuS	-
	674843			-	TSS	0	0.253333	1.67333	8.12024e-16	-2.06667	2.1182	2.83901e-13	2.04	1.34375	2.76151e-13	0.173333	0.472724	4.06739e-14
	675018	ybeL	+
	675500	\ybeL	+
	675570	ybeQ	-
	676547	\ybeQ	-
	676711	ybeR	+
	677415	djlB	+
	677418	\ybeR	+
	678842	\djlB	+
	678852	ybeT	-
	679406	\ybeT	-
	679508	ybeU	+
	680212	djlC	+
	680215	\ybeU	+
	681663	\djlC	+
	681723	hscC	-
	683393	\hscC	-
	683477	rihA	-
	684412	\rihA	-
	684530	gltL	-
	685255	gltK \gltL	--
	685929	gltJ \gltK	--
	686669	\gltJ	-
	686837			-	PSS	0	0.0666667	0.362959	0.000360479	-0.186667	0.511277	0.000861509	0.0933333	0.446412	4.92035e-05	0.0666667	0.222711	0.000661333
	686839	gltI	-
	686841			-	PSS	0	0.24	0.637496	3.4003e-07	-0.573333	0.873918	2.41961e-06	0.44	0.677249	1.57999e-06	-0.146667	0.372465	2.83545e-06
	687747	\gltI	-
	687997	insH1	-
	689013	\insH1	-
	689343	lnt	-
	690794			-	PSS	0	-0.266667	0.399333	0.000791124	0.133333	0.431432	0.192625	0.426667	0.258658	0.000207494	0.0933333	0.961591	0.000133127
	690881	\lnt	-
	690906	ybeX	-
	691784	\ybeX	-
	691874	ybeY	-
	692338	ybeZ	-
	692341	\ybeY	-
	692345			-	PSS	0	0.0266667	0.711927	1.1612e-06	-0.08	0.119367	0.00935314	0.106667	0.11755	0.00333563	-0.04	0.188642	0.000292785
	692750			-	TSS	0	-0.0133333	0.389769	0.0769563	-0.04	0.39598	0.00099981	0.0533333	0.263312	0.00162152	-1.24345e-16	0.117758	5.73333e-05
	693378	\ybeZ	-
	693434			-	UND	0	-0.106667	0.146593	0.992727	0.146667	0.164877	0.0220707	0.12	0.384277	1.72613e-05	-0.0933333	0.469258	1.37918e-05
EcoCyc (H)	693467			-	UND	0	-0.0333333	0.154488	1.8688e-05	-0.113333	0.275256	0.306368	0.506667	0.216641	3.34024e-07	-0.533333	0.259771	1.56437e-07
	693531	miaB	-
	694955	\miaB	-
	694989			-	UND	0	0.08	0.277642	4.3153e-08	-0.306667	0.365539	0.22636	0.32	0.253126	3.75467e-05	-0.106667	0.165355	0.00352948
	694990			-	UND	0	0.0533333	0.158325	1.72193e-07	-0.2	0.265591	0.22122	0.146667	0.147874	0.248654	0.16	0.24842	0.00103471
	695077			+	TSS	0	-0.2	0.263312	0.0683015	0.12	0.328228	0.0139161	0.106667	0.222718	0.00959185	-0.0133333	0.163122	0.000332017
	695101	ubiF	+
	696276	\ubiF	+
	697513	asnB	-
	699177	\asnB	-
	699574	umpH	-
	700326	\umpH	-
	700374	nagC	-
	700647			-	UND	0	0.0933333	0.732967	1	-0.0933333	0.126491	1	0.16	0.252646	4.25647e-08	0.12	0.556657	1.60896e-10
	701594	\nagC	-
	701603	nagA	-
EcoCyc (D)	701863			-	TSS	0	-0.466667	0.425258	0.000428389	0.4	0.426516	1	0.133333	0.81824	1.05481e-10	0.0133333	0.121366	1
	702751	\nagA	-
	702811	nagB	-
	703611	\nagB	-
	703635			-	PSS	0	-0.853333	0.791623	6.29242e-06	0.626667	0.843234	1	0.293333	0.159141	8.22534e-15	-0.0666667	0.965567	1
	703636			-	UND	0	-0.4	0.848339	0.0248273	0.04	0.971342	0.999993	0.386667	0.475442	1.59905e-06	-1.60982e-16	0.11384	1
EcoCyc (D)	703840			+	TSS	0	-0.373333	0.355546	0.0157531	0.32	0.313262	0.97426	0.04	0.733287	0.512102	0.0933333	0.692824	0.338573
	703944	nagE	+
	705860			+	UND	0	-0.0666667	0.136627	5.23874e-07	-0.0133333	0.153189	0.00899424	0.08	0.952193	0.0131696	0.146667	0.236643	0.00250433
	705890	\nagE	+
EcoCyc	706060			+	TSS	0	-0.293333	0.488262	1.07436e-05	0.146667	0.523122	8.69243e-05	0.173333	0.216773	0.000108393	0.106667	0.25314	0.000552549
	706061			+	TSS	0	0.0933333	0.322494	5.42525e-06	-0.213333	0.465941	4.33721e-06	-0.0133333	0.369542	0.0210211	0.253333	0.316981	0.128983
	706062			+	UND	0	-0.0133333	0.226276	3.48538e-05	-0.12	0.294125	0.00899422	0.12	0.294549	0.231351	-0.0266667	0.815875	0.998098
	706063			+	TSS	0	0.826667	1.88497	4.93727e-15	-2.78	2.54792	7.58647e-09	2.22667	1.74159	4.91986e-07	0.18	1.17245	3.60387e-09
	706093	glnS	+
	707757	\glnS	+
	708334	chiP	+
	709740	\chiP	+
	709790	chiQ	+
	710116	\chiQ	+
	710200	fur	-
	710639	uof	-
	710646	\fur	-
EcoCyc (D)	710714			-	UND	0	0	0.287519	1.0212e-10	-0.28	0.337417	0.251301	0.386667	0.213521	3.20811e-05	-0.24	0.163299	0.985823
EcoCyc (D)	710721			-	UND	0	-0.32	0.225926	0.990211	0.306667	0.226274	0.35979	0.0266667	0.326614	0.473885	0.16	0.227666	1
	710725	\uof	-
EcoCyc	710826			-	TSS	0	-0.386667	0.37877	0.000481336	0.2	0.452985	0.0188661	0.386667	0.214165	7.95675e-06	-0.2	0.254355	2.15141e-07
	710935	fldA	-
	711465	\fldA	-
EcoCyc	711519			-	TSS	0	-0.146667	0.488888	2.55269e-11	-0.306667	0.689378	0.000262305	0.6	0.513318	2.8802e-05	-0.133333	0.324467	0.000518463
	711605	ybfE	-
	711898	\ybfE	-
	711950			-	TSS	0	0.173333	0.117757	9.75866e-06	-0.2	0.226492	1.24055e-05	-3.38618e-16	0.241638	0.00280004	-0.0133333	0.225985	0.00561595
	712038	ybfF	-
	712802	\ybfF	-
	712916			+	UND	0	-0.133333	0.126491	3.10228e-06	0.0933333	0.145187	0.000368158	0.0266667	0.156369	0.265149	0.08	0.127515	0.00528836
	712987	seqA	+
	713532	\seqA	+
	713558	pgm	+
	715198	\pgm	+
	715412	ybfP	+
	715906	\ybfP	+
	715947	ybfG	-
	716506			-	UND	0	0.0133333	0.239577	1	0.106667	0.895289	1	0.0533333	0.186231	2.58335e-10	-0.346667	0.229783	1.5313e-06
	716597	\ybfG	-
	716638			-	TSS	0	0.946667	0.679474	6.67178e-10	2.46667	1.66365	2.52086e-17	-2.17333	2.44382	5.3834e-17	-1.49333	2.49693	4.04888e-16
	716639			-	TSS	0	0.546667	0.277642	1	3.26667	0.953884	1	-2.95333	1.53363	1.70693e-16	-0.826667	2.26764	6.97199e-16
	716640			-	UND	0	0.24	0.11755	1	0.88	0.442418	1	-0.92	0.715915	6.34358e-15	-0.0533333	1.15169	4.28344e-11
EcoCyc (E)	716641			-	UND	0	0.346667	0.258652	1	0.44	0.373818	1	-0.933333	0.415693	5.75765e-14	0.56	0.611882	1.22054e-14
	716721	ybfI	-
	716870	\ybfI	-
	716946	potE	-
	718262	speF	-
	718265	\potE	-
	720460	\speF	-
	720583	ybfK	+
	720840	\ybfK	+
	721056	kdpE	-
	721730	kdpD	-
	721733	\kdpE	-
	724407	kdpC	-
	724414	\kdpD	-
	724979	\kdpC	-
	724988	kdpB	-
	727036	\kdpB	-
	727059	kdpA	-
	728732	kdpF \kdpA	--
	728821	\kdpF	-
EcoCyc (D)	728847			-	UND	0	-0.08	0.8	1	0.0933333	0.832669	3.93556e-07	0.24	0.293942	1	-0.106667	0.448482	4.18633e-09
	729072			+	TSS	0	-0.466667	0.673111	2.2308e-11	0.28	0.698896	1.30504e-07	0.16	0.222837	4.62891e-05	0.0266667	0.165399	4.03722e-08
	729134	ybfA	+
	729340	\ybfA	+
	729583	rhsC	+
	733776	ybfB \rhsC	++
	734102	\ybfB	+
	734133	rhsO	+
	735650	ybfC	+
	735653	\rhsO	+
	736219	\ybfC	+
	736445	ybfQ	+
	736684	\ybfQ	+
	736825	ybfL	+
	737961	\ybfL	+
	738092	ybfD	+
	738853	\ybfD	+
	739001	ybgA	+
	739507	phr	+
	739510	\ybgA	+
	740925	\phr	+
	741075	dtpD	-
	742556	\dtpD	-
EcoCyc	742798			+	TSS	0	-0.0266667	0.246577	1.03813e-05	-0.146667	0.282844	0.282046	0.16	0.142362	0.967443	0.04	0.579612	0.0575009
	742827	ybgI	+
	743570	\ybgI	+
	743593	ybgJ	+
	744243	ybgK	+
	744249	\ybgJ	+
	745165	ybgL	+
	745175	\ybgK	+
	745899	\ybgL	+
	745935	nei	+
	746723	abrB	-
	746726	\nei	+
	747769	\abrB	-
	747801			-	UND	0	-0.48	0.389872	0.972412	0.493333	0.393277	0.367819	-0.0133333	0.732967	0.159961	-0.0133333	0.611193	0.965516
	747921	ybgO	-
	748979	ybgP	-
	748982	\ybgO	-
	749707	\ybgP	-
	749722	ybgQ	-
	752169	\ybgQ	-
	752229	ybgD	-
	752795	\ybgD	-
	753185	gltA	-
	754468	\gltA	-
	754669			-	UND	0	-0.533333	0.5755	6.46822e-06	0.36	0.582488	0.348043	0.28	0.183333	0.00302553	0.226667	0.459557	8.94497e-07
	754675			-	UND	0	-0.72	0.912584	0.133569	0.586667	0.933672	0.999559	0.186667	0.297377	0.00013376	0.133333	0.234913	1
	754676			-	PSS	0	-1.36	1.44591	0.00566291	1.33333	1.44766	0.162352	0.04	0.145152	0.167474	0.28	0.187617	0.000188912
	754679			-	TSS	0	-0.36	0.389187	0.0158614	0.306667	0.392122	0.999998	0.0533333	0.478835	5.24992e-07	0.0133333	0.239577	1
	754681			-	UND	0	-0.36	0.222716	0.388625	0.36	0.2278	0.330641	0.0266667	0.842192	0.154948	0.0266667	0.187617	0.1678
	754719			-	TSS	0	-0.653333	0.723198	0.14119	0.626667	0.727684	0.19244	0.0533333	0.113138	0.118248	0.0266667	0.12	2.6373e-06
EcoCyc (D)	754770			-	UND	0	-0.146667	0.163299	0.931415	0.12	0.178885	0.538277	0.133333	0.166466	4.38067e-07	0.0133333	0.372993	1.47158e-07
	754840			+	TSS	0	0.0533333	0.239577	1	0.24	0.123717	1	0.00666667	0.353818	1.16e-09	0.92	1.47488	4.97516e-11
EcoCyc (D)	754955			+	TSS	0	-1.37333	0.858836	5.63974e-10	1.18667	0.876357	0.0066772	0.773333	0.565199	1.60751e-07	0.373333	0.923698	4.15083e-14
	755177	sdhC	+
	755449			+	UND	0	-0.253333	0.197315	1	0.28	0.198662	3.98118e-10	-1.60982e-16	0.981464	1	0.106667	0.214144	0.00052955
	755560	sdhD	+
	755566	\sdhC	+
	755883			+	UND	0	-0.133333	0.316749	0.83671	0.16	0.341377	0.00287764	0.0266667	0.211661	0.00331521	-0.106667	0.229783	0.000425694
	755907	sdhA \sdhD	++
	756364			+	UND	0	-0.12	0.293315	0.0130235	0.0666667	0.297547	0.987286	0.106667	0.11755	0.0243192	0.153333	0.269535	1.09528e-05
	757456			+	UND	0	-0.173333	0.252646	0.973023	0.16	0.257869	0.399298	0.0133333	0.611193	0.629367	0.12	0.134667	0.00114299
	757673	\sdhA	+
	757689	sdhB	+
	757825			+	UND	0	-0.453333	0.919438	0.025453	0.226667	0.96555	0.872504	0.333333	0.315858	1.93629e-07	0.2	0.664932	0.00111655
	758405	\sdhB	+
	758554			+	PSS	0	-0.186667	0.273847	0.00728539	0.133333	0.381125	0.873568	0.133333	0.213296	0.00120923	0.44	0.883793	0.000218356
EcoCyc (S)	758585			+	UND	0	-0.346667	0.343317	0.00566291	0.28	0.346643	0.97457	0.0666667	0.579612	0.411687	0.24	0.228626	1.94268e-06
	758706	sucA	+
	758999			+	UND	0	0.0266667	0.258652	0.00152735	-0.173333	0.343898	0.263	0.186667	0.248338	0.121927	-0.0533333	0.117822	0.0184087
	759059			+	TSS	0	-0.186667	0.462457	0.000148073	0.08	0.4996	0.907813	0.12	0.265591	0.0845222	0.146667	0.154919	1.74882e-05
	760737			+	TSS	0	-0.2	0.25923	0.00251988	0.08	0.3125	0.272082	0.146667	0.177388	0.000762994	-0.0533333	0.611193	0.979297
	761388			+	PSS	0	-0.08	0.235514	2.33496e-05	-0.0666667	0.299334	0.235217	0.213333	0.19596	0.000104916	0.0133333	0.335581	0.003222
[truncated: 10,022 more rows]
