# Supplementary material
Source: HighWire-hosted journal article supplement (doi:10.1101/rna.073288.119)
Supplement: Supplemental_Table_S6_Sequencing_adapters.xlsx [file Supplemental_Table_S6_Sequencing_adapters.xlsx]

## Sheet: Sequencing adapters
	Table S6. Contents of SOLiD sequencing adapter files.
	Solid_5prime.fasta	>P1_Adapter
		CCACTACGCCTCCGCTTTCCTCTCTATGGGCAGTCGGTGA
	Solid_3prime.fasta	>P2_Adapter
		AGAGAATGAGGAACCCGGGGCAGTT
		>Barcode_Adapter
		CGCCTTGGCCGTACAGCAG
		>Internal_Adapter
		CTGCCCCGGGTTCCTCATTCTCT
		>Internal_Adapter2
		GGCCAAGGCGGATGTACGGT
